# Supplementary material for: Transcriptome Profiles of Human Visceral Adipocytes in Obesity and Colorectal Cancer Unravel the Effects of Body Mass Index and Polyunsaturated Fatty Acids on Genes and Biological Processes Related to Tumorigenesis
Source: Front Immunol. 2019 Feb 19;10:265. doi: 10.3389/fimmu.2019.00265 (PMC6389660; doi:10.3389/fimmu.2019.00265)
Supplement: Supplementary file 2 [file Data_Sheet_2.xlsx]

## Sheet: NwCRC_Nw
Supplementary Data 2: Differential expression of adipocyte transcripts in lean subjects affected or not by CRC, by RNASeq analysis.
TranscriptRecID	GeneID	Chr	Start	Stop	Strand	TranscriptName	TranscriptType	EnsG	GeneSymbol	GeneType	EntrezGeneID	cffmpType	cffmpNearestTranscript	logFC	logCPM	LR	PValue	FDR	-
ENST00000474486	ENSG00000158882	1	161226060	161230615	+	TOMM40L-003	processed_transcript	ENSG00000158882	TOMM40L	protein_coding	84134	E	ENST00000474486	14.3592	1.4287	66.2708	3.9304e-16	1.36479e-11	-
MSTRG.24517.4	NA	20	38033832	38092352	+	not_in_ref	not_in_ref	not_in_ref	not_in_ref	not_in_ref	no_EG	j	ENST00000373433	-15.3083	1.36888	63.8303	1.35615e-15	2.35455e-11	-
ENST00000429829	ENSG00000229807	X	73820656	73852753	-	XIST-001	lincRNA	ENSG00000229807	XIST	lincRNA	7503	E	ENST00000429829	-14.3437	5.2458	62.5728	2.56781e-15	2.97215e-11	-
ENST00000357121	ENSG00000122126	X	129540275	129592561	+	OCRL-002	protein_coding	ENSG00000122126	OCRL	protein_coding	4952	E	ENST00000357121	-21.3032	2.39794	58.2289	2.33329e-14	2.02552e-10	-
MSTRG.21707.3	NA	2	61017720	61051922	+	not_in_ref	not_in_ref	not_in_ref	not_in_ref	not_in_ref	no_EG	j	ENST00000295030	7.49358	2.62218	55.6516	8.65234e-14	6.00887e-10	-
MSTRG.9832.7	NA	12	120127243	120190392	-	not_in_ref	not_in_ref	not_in_ref	not_in_ref	not_in_ref	no_EG	j	ENST00000300648	9.5784	2.19706	53.8786	2.1327e-13	1.23427e-09	-
MSTRG.14397.5	NA	16	11675141	11679156	+	not_in_ref	not_in_ref	not_in_ref	not_in_ref	not_in_ref	no_EG	j	ENST00000329565	7.5148	3.75081	49.7108	1.78163e-12	8.311e-09	-
MSTRG.39285.11	NA	9	92210360	92242689	-	not_in_ref	not_in_ref	not_in_ref	not_in_ref	not_in_ref	no_EG	j	ENST00000627121	19.0312	0.481115	49.5694	1.91476e-12	8.311e-09	-
ENST00000570322	ENSG00000170291	17	7252525	7259940	+	ELP5-004	protein_coding	ENSG00000170291	ELP5	protein_coding	23587	E	ENST00000570322	19.2113	0.759794	49.0424	2.5049e-12	8.36189e-09	-
ENST00000431419	ENSG00000106245	7	99415136	99419577	+	BUD31-005	protein_coding	ENSG00000106245	BUD31	protein_coding	8896	E	ENST00000431419	-15.3745	0.611065	48.9596	2.61288e-12	8.36189e-09	-
ENST00000326587	ENSG00000179222	X	51893602	51902357	+	MAGED1-001	protein_coding	ENSG00000179222	MAGED1	protein_coding	9500	E	ENST00000326587	6.26146	2.7855	48.9327	2.64891e-12	8.36189e-09	-
ENST00000478396	ENSG00000136536	2	159759292	159767850	+	MARCH7-008	processed_transcript	ENSG00000136536	MARCH7	protein_coding	64844	E	ENST00000478396	-15.0171	1.01121	48.261	3.73091e-12	1.0272e-08	-
ENST00000393353	ENSG00000115641	2	105360826	105399051	-	FHL2-003	protein_coding	ENSG00000115641	FHL2	protein_coding	2274	E	ENST00000393353	-15.3992	-0.441326	48.2017	3.84563e-12	1.0272e-08	-
ENST00000605750	ENSG00000188321	19	9324197	9343610	+	ZNF559-013	protein_coding	ENSG00000188321	ZNF559	protein_coding	84527	E	ENST00000605750	-22.7805	0.0167306	47.873	4.54734e-12	1.10582e-08	-
MSTRG.37079.2	NA	8	23135588	23163897	-	not_in_ref	not_in_ref	not_in_ref	not_in_ref	not_in_ref	no_EG	j	ENST00000312584	10.3806	0.585308	47.7765	4.77692e-12	1.10582e-08	-
ENST00000558498	ENSG00000104043	15	49858238	49876695	-	ATP8B4-006	processed_transcript	ENSG00000104043	ATP8B4	protein_coding	79895	E	ENST00000558498	11.306	1.86626	45.7556	1.33964e-11	2.90735e-08	-
ENST00000338844	ENSG00000172236	16	1240696	1242554	+	TPSAB1-001	protein_coding	ENSG00000172236	TPSAB1	protein_coding	7177	E	ENST00000338844	-12.6573	0.812619	45.1928	1.78558e-11	3.64721e-08	-
ENST00000274008	ENSG00000145375	4	122923074	123319450	+	SPATA5-001	protein_coding	ENSG00000145375	SPATA5	protein_coding	166378	E	ENST00000274008	20.5262	0.168907	44.2361	2.91062e-11	5.47085e-08	-
MSTRG.16539.7	NA	17	29566588	29573157	+	not_in_ref	not_in_ref	not_in_ref	not_in_ref	not_in_ref	no_EG	j	ENST00000301057	-7.48959	1.47841	44.1812	2.9935e-11	5.47085e-08	-
ENST00000620651	ENSG00000196588	22	40410282	40436310	-	MKL1-205	protein_coding	ENSG00000196588	MKL1	protein_coding	57591	E	ENST00000620651	-15.4312	1.1953	43.6571	3.91251e-11	6.7929e-08	-
MSTRG.25078.7	NA	21	29024765	29054483	+	not_in_ref	not_in_ref	not_in_ref	not_in_ref	not_in_ref	no_EG	j	ENST00000334352	-14.1226	2.08698	43.5424	4.14862e-11	6.85985e-08	-
ENST00000412516	ENSG00000169084	X	2243062	2500973	-	DHRSX-004	protein_coding	ENSG00000169084	DHRSX	protein_coding	207063	E	ENST00000412516	-15.7616	-0.872216	42.4873	7.1141e-11	1.12286e-07	-
MSTRG.39560.9	NA	9	109780456	110172512	+	not_in_ref	not_in_ref	not_in_ref	not_in_ref	not_in_ref	no_EG	j	ENST00000374530	8.67519	5.13277	42.0089	9.08603e-11	1.37175e-07	-
ENST00000380909	ENSG00000170638	22	50185915	50199564	+	TRABD-003	protein_coding	ENSG00000170638	TRABD	protein_coding	80305	E	ENST00000380909	-9.03724	1.85772	41.8994	9.60911e-11	1.39028e-07	-
MSTRG.33157.1	NA	6	31268749	31357187	-	not_in_ref	not_in_ref	not_in_ref	not_in_ref	not_in_ref	no_EG	j	ENST00000412585	8.18066	5.00833	41.7581	1.03292e-10	1.43468e-07	-
ENST00000509622	ENSG00000174720	4	112637127	112657586	+	LARP7-003	nonsense_mediated_decay	ENSG00000174720	LARP7	protein_coding	51574	E	ENST00000509622	-8.18111	1.2112	41.1987	1.37511e-10	1.83652e-07	-
MSTRG.3815.7	NA	1	230979146	231000533	+	not_in_ref	not_in_ref	not_in_ref	not_in_ref	not_in_ref	no_EG	j	ENST00000310256	4.34893	0.949283	40.6133	1.85541e-10	2.38619e-07	-
MSTRG.27757.12	NA	3	124762948	124821458	-	not_in_ref	not_in_ref	not_in_ref	not_in_ref	not_in_ref	no_EG	j	ENST00000296181	6.71349	1.63578	40.3608	2.11131e-10	2.61833e-07	-
MSTRG.17995.2	NA	17	81245000	81295111	-	not_in_ref	not_in_ref	not_in_ref	not_in_ref	not_in_ref	no_EG	j	ENST00000374759	-8.64333	2.68377	39.8468	2.74684e-10	3.20515e-07	-
ENST00000521308	ENSG00000198624	5	151181052	151224093	-	CCDC69-002	processed_transcript	ENSG00000198624	CCDC69	protein_coding	26112	E	ENST00000521308	8.5507	5.81744	39.831	2.76911e-10	3.20515e-07	-
MSTRG.18888.8	NA	19	680751	683390	+	not_in_ref	not_in_ref	not_in_ref	not_in_ref	not_in_ref	no_EG	j	ENST00000166139	8.44653	3.68631	39.6221	3.08182e-10	3.45204e-07	-
MSTRG.26995.17	NA	3	49108090	49119281	-	not_in_ref	not_in_ref	not_in_ref	not_in_ref	not_in_ref	no_EG	j	ENST00000453664	-9.94244	2.18721	39.2523	3.72421e-10	4.04123e-07	-
ENST00000581031	ENSG00000126858	17	32142568	32225503	+	RHOT1-005	nonsense_mediated_decay	ENSG00000126858	RHOT1	protein_coding	55288	E	ENST00000581031	-14.9619	-0.689361	38.899	4.46308e-10	4.69625e-07	-
MSTRG.25253.11	NA	21	41370514	41408943	+	not_in_ref	not_in_ref	not_in_ref	not_in_ref	not_in_ref	no_EG	j	ENST00000330714	-11.6584	2.70487	38.7506	4.81573e-10	4.91827e-07	-
MSTRG.17811.33	NA	17	75232116	75235757	+	not_in_ref	not_in_ref	not_in_ref	not_in_ref	not_in_ref	no_EG	j	ENST00000245544	4.38258	-0.96493	38.6552	5.05689e-10	5.01701e-07	-
ENST00000340666	ENSG00000008056	X	47571904	47619853	-	SYN1-002	protein_coding	ENSG00000008056	SYN1	protein_coding	6853	E	ENST00000340666	-11.5412	0.316921	38.3407	5.94114e-10	5.73056e-07	-
MSTRG.4400.6	NA	10	32267758	32346819	-	not_in_ref	not_in_ref	not_in_ref	not_in_ref	not_in_ref	no_EG	j	ENST00000263062	-16.6454	1.79418	38.1443	6.57022e-10	6.16606e-07	-
ENST00000376406	ENSG00000137337	6	30699807	30717889	-	MDC1-001	protein_coding	ENSG00000137337	MDC1	protein_coding	9656	E	ENST00000376406	-13.7263	-1.22207	37.7144	8.18992e-10	7.48386e-07	-
ENST00000522566	ENSG00000164930	8	103298433	103332817	+	FZD6-001	protein_coding	ENSG00000164930	FZD6	protein_coding	8323	E	ENST00000522566	-12.5446	1.27051	37.59	8.72898e-10	7.73128e-07	-
ENST00000344641	ENSG00000148187	9	122264656	122331343	+	MRRF-001	protein_coding	ENSG00000148187	MRRF	protein_coding	92399	E	ENST00000344641	-9.15441	0.891119	37.5509	8.90598e-10	7.73128e-07	-
ENST00000607788	ENSG00000108963	17	2041102	2043421	+	DPH1-018	protein_coding	ENSG00000108963	DPH1	protein_coding	1801	E	ENST00000607788	5.77564	1.47304	37.4334	9.45866e-10	8.01079e-07	-
MSTRG.21227.2	NA	2	25733753	25856966	-	not_in_ref	not_in_ref	not_in_ref	not_in_ref	not_in_ref	no_EG	j	ENST00000435504	3.3041	2.72902	37.102	1.1211e-09	9.02268e-07	-
ENST00000573947	ENSG00000072210	17	19663386	19675779	+	ALDH3A2-011	nonsense_mediated_decay	ENSG00000072210	ALDH3A2	protein_coding	224	noCuffcomp	noCuffcomp	-15.398	0.318748	37.0837	1.13167e-09	9.02268e-07	-
ENST00000484960	ENSG00000183605	10	119140913	119155123	-	SFXN4-008	processed_transcript	ENSG00000183605	SFXN4	protein_coding	119559	noCuffcomp	noCuffcomp	5.04339	-0.211373	37.0637	1.1433e-09	9.02268e-07	-
MSTRG.28559.2	NA	3	185190624	185254031	-	not_in_ref	not_in_ref	not_in_ref	not_in_ref	not_in_ref	no_EG	j	ENST00000231887	-10.4261	1.23224	36.8769	1.25829e-09	9.40052e-07	-
ENST00000591084	ENSG00000161265	19	35742527	35744699	-	U2AF1L4-010	nonsense_mediated_decay	ENSG00000161265	U2AF1L4	protein_coding	199746	E	ENST00000591084	3.78891	-0.528881	36.8419	1.28109e-09	9.40052e-07	-
MSTRG.35415.2	NA	7	56101571	56106431	-	not_in_ref	not_in_ref	not_in_ref	not_in_ref	not_in_ref	no_EG	j	ENST00000395422	7.87648	4.27547	36.8184	1.29658e-09	9.40052e-07	-
ENST00000272065	ENSG00000143727	2	264872	278283	+	ACP1-001	protein_coding	ENSG00000143727	ACP1	protein_coding	52	E	ENST00000272065	-11.5074	1.99977	36.8141	1.29946e-09	9.40052e-07	-
MSTRG.25456.11	NA	22	17787669	17827743	-	not_in_ref	not_in_ref	not_in_ref	not_in_ref	not_in_ref	no_EG	j	ENST00000441493	8.97092	-0.706122	36.7598	1.33617e-09	9.46879e-07	-
ENST00000259043	ENSG00000136527	3	185917155	185923893	-	TRA2B-014	protein_coding	ENSG00000136527	TRA2B	protein_coding	NA	noCuffcomp	noCuffcomp	7.70596	2.21837	36.7052	1.3741e-09	9.54287e-07	-
MSTRG.34074.2	NA	6	113940718	113968530	-	not_in_ref	not_in_ref	not_in_ref	not_in_ref	not_in_ref	no_EG	j	ENST00000368632	7.98577	4.01269	35.7081	2.29213e-09	1.56063e-06	-
ENST00000495008	ENSG00000198919	3	108589705	108694032	+	DZIP3-002	nonsense_mediated_decay	ENSG00000198919	DZIP3	protein_coding	9666	E	ENST00000495008	-10.8389	-0.251568	35.5889	2.43676e-09	1.62719e-06	-
MSTRG.1658.10	NA	1	86956484	87109948	+	not_in_ref	not_in_ref	not_in_ref	not_in_ref	not_in_ref	no_EG	j	ENST00000370548	7.82294	3.70132	35.4652	2.59647e-09	1.69527e-06	-
ENST00000432408	ENSG00000113851	3	3150011	3179710	-	CRBN-004	protein_coding	ENSG00000113851	CRBN	protein_coding	51185	E	ENST00000432408	8.29003	3.21149	35.4355	2.63634e-09	1.69527e-06	-
MSTRG.16092.4	NA	17	9910729	10019897	-	not_in_ref	not_in_ref	not_in_ref	not_in_ref	not_in_ref	no_EG	j	ENST00000323816	1.70444	0.118732	35.1785	3.00832e-09	1.86834e-06	-
MSTRG.15839.11	NA	17	2593968	2685615	+	not_in_ref	not_in_ref	not_in_ref	not_in_ref	not_in_ref	no_EG	j	ENST00000397195	6.66746	4.12827	35.1754	3.0131e-09	1.86834e-06	-
ENST00000261978	ENSG00000119681	14	74498170	74612331	-	LTBP2-001	protein_coding	ENSG00000119681	LTBP2	protein_coding	4053	E	ENST00000261978	-11.6111	2.24871	35.0951	3.13991e-09	1.91281e-06	-
ENST00000219782	ENSG00000103495	16	29806596	29811164	+	MAZ-004	protein_coding	ENSG00000103495	MAZ	protein_coding	4150	E	ENST00000219782	0.421791	0.594759	34.6608	3.92459e-09	2.34961e-06	-
MSTRG.33191.13	NA	6	31633954	31637651	+	not_in_ref	not_in_ref	not_in_ref	not_in_ref	not_in_ref	no_EG	j	ENST00000376033	7.26827	0.49592	34.5667	4.11903e-09	2.42422e-06	-
MSTRG.19088.6	NA	19	4675238	4723750	-	not_in_ref	not_in_ref	not_in_ref	not_in_ref	not_in_ref	no_EG	j	ENST00000598800	-12.8462	0.739903	34.3256	4.66217e-09	2.67591e-06	-
MSTRG.27346.7	NA	3	73382533	73624881	-	not_in_ref	not_in_ref	not_in_ref	not_in_ref	not_in_ref	no_EG	j	ENST00000263666	-7.51656	0.683658	34.2438	4.86226e-09	2.67591e-06	-
ENST00000394934	ENSG00000197746	10	71816299	71851325	-	PSAP-201	protein_coding	ENSG00000197746	PSAP	protein_coding	5660	E	ENST00000394934	7.29538	7.69553	34.2239	4.91207e-09	2.67591e-06	-
ENST00000246194	ENSG00000125970	20	33993722	34080271	+	RALY-002	protein_coding	ENSG00000125970	RALY	protein_coding	NA	E	ENST00000246194	-9.98261	0.940131	34.2203	4.92124e-09	2.67591e-06	-
MSTRG.11635.34	NA	14	61549227	61550949	+	not_in_ref	not_in_ref	not_in_ref	not_in_ref	not_in_ref	no_EG	j	ENST00000332981	7.83615	-0.50883	34.2161	4.93198e-09	2.67591e-06	-
MSTRG.39940.4	NA	9	130713980	130887675	+	not_in_ref	not_in_ref	not_in_ref	not_in_ref	not_in_ref	no_EG	j	ENST00000318560	7.04774	2.40706	34.0824	5.28282e-09	2.82216e-06	-
MSTRG.26882.9	NA	3	45389063	45549353	+	not_in_ref	not_in_ref	not_in_ref	not_in_ref	not_in_ref	no_EG	j	ENST00000265537	-15.0787	0.628591	33.6127	6.72536e-09	3.52257e-06	-
MSTRG.35157.10	NA	7	32979474	33006907	+	not_in_ref	not_in_ref	not_in_ref	not_in_ref	not_in_ref	no_EG	j	ENST00000538336	3.48501	0.804152	33.5921	6.7968e-09	3.52257e-06	-
ENST00000553460	ENSG00000165782	14	20457858	20459691	-	TMEM55B-007	protein_coding	ENSG00000165782	TMEM55B	protein_coding	90809	E	ENST00000553460	4.69004	0.438822	33.508	7.09711e-09	3.62412e-06	-
MSTRG.12765.5	NA	15	25337253	25438959	-	not_in_ref	not_in_ref	not_in_ref	not_in_ref	not_in_ref	no_EG	j	ENST00000566215	-9.6079	1.41809	33.4199	7.42597e-09	3.72281e-06	-
MSTRG.40642.1	NA	X	47635521	47650488	-	not_in_ref	not_in_ref	not_in_ref	not_in_ref	not_in_ref	no_EG	j	ENST00000376983	6.23508	2.11521	33.3994	7.50481e-09	3.72281e-06	-
ENST00000253458	ENSG00000131149	16	85613216	85676204	+	GSE1-002	protein_coding	ENSG00000131149	GSE1	protein_coding	23199	E	ENST00000253458	-7.62748	1.95484	33.3479	7.70593e-09	3.76874e-06	-
ENST00000527677	ENSG00000104522	8	143612621	143613391	-	TSTA3-017	retained_intron	ENSG00000104522	TSTA3	protein_coding	7264	E	ENST00000527677	6.04996	0.437919	32.8058	1.01843e-08	4.91165e-06	-
ENST00000590503	ENSG00000188283	19	37218190	37243685	+	ZNF383-003	protein_coding	ENSG00000188283	ZNF383	protein_coding	NA	E	ENST00000590503	-11.1943	-0.838808	32.5346	1.17089e-08	5.53379e-06	-
ENST00000297450	ENSG00000154188	8	107249493	107498055	-	ANGPT1-003	protein_coding	ENSG00000154188	ANGPT1	protein_coding	284	E	ENST00000297450	-10.6381	1.54585	32.5207	1.1793e-08	5.53379e-06	-
ENST00000493802	ENSG00000162645	1	89108117	89113050	-	GBP2-004	processed_transcript	ENSG00000162645	GBP2	protein_coding	NA	E	ENST00000493802	4.72478	1.79015	32.4623	1.21527e-08	5.62653e-06	-
ENST00000589389	ENSG00000140632	16	4803203	4846210	-	GLYR1-005	protein_coding	ENSG00000140632	GLYR1	protein_coding	84656	E	ENST00000589389	-13.7574	3.11657	32.3819	1.26658e-08	5.78692e-06	-
ENST00000394168	ENSG00000112624	6	42821056	42868558	+	GLTSCR1L-201	protein_coding	ENSG00000112624	GLTSCR1L	protein_coding	23506	E	ENST00000394168	0.935225	2.85911	32.262	1.34723e-08	6.07548e-06	-
MSTRG.7674.7	NA	11	118572453	118602918	+	not_in_ref	not_in_ref	not_in_ref	not_in_ref	not_in_ref	no_EG	j	ENST00000359415	6.2462	2.85746	31.535	1.9588e-08	8.72018e-06	-
ENST00000397124	ENSG00000167965	16	2205741	2209397	+	MLST8-003	protein_coding	ENSG00000167965	MLST8	protein_coding	64223	E	ENST00000397124	6.21868	2.80654	31.4027	2.09693e-08	9.21692e-06	-
MSTRG.1303.13	NA	1	54186155	54196404	-	not_in_ref	not_in_ref	not_in_ref	not_in_ref	not_in_ref	no_EG	j	ENST00000528287	-6.11764	-1.02385	31.3736	2.12854e-08	9.23892e-06	-
ENST00000522563	ENSG00000156831	8	125091870	125367075	+	NSMCE2-007	protein_coding	ENSG00000156831	NSMCE2	protein_coding	286053	E	ENST00000522563	5.6789	1.94861	31.2439	2.27564e-08	9.64505e-06	-
ENST00000611366	ENSG00000100918	14	24172025	24180254	+	REC8-002	protein_coding	ENSG00000100918	REC8	protein_coding	9985	E	ENST00000611366	-9.80089	0.185722	31.2422	2.27766e-08	9.64505e-06	-
MSTRG.26054.8	NA	22	41245615	41286749	-	not_in_ref	not_in_ref	not_in_ref	not_in_ref	not_in_ref	no_EG	j	ENST00000405486	6.83609	1.91871	31.1171	2.42926e-08	1.01631e-05	-
MSTRG.40945.4	NA	X	73820656	73833761	-	not_in_ref	not_in_ref	not_in_ref	not_in_ref	not_in_ref	no_EG	j	ENST00000429829	-7.05927	2.38508	30.6961	3.01778e-08	1.24749e-05	-
ENST00000223215	ENSG00000106484	7	130492093	130506292	+	MEST-001	protein_coding	ENSG00000106484	MEST	protein_coding	4232	E	ENST00000223215	-6.91864	1.82453	30.6386	3.10852e-08	1.26632e-05	-
ENST00000615648	ENSG00000261150	8	143857324	143878464	-	EPPK1-001	protein_coding	ENSG00000261150	EPPK1	protein_coding	83481	E	ENST00000615648	-10.246	-1.93817	30.5703	3.21979e-08	1.26632e-05	-
ENST00000560330	ENSG00000166819	15	89664367	89667640	-	PLIN1-005	protein_coding	ENSG00000166819	PLIN1	protein_coding	5346	E	ENST00000560330	6.76613	7.57529	30.5636	3.23091e-08	1.26632e-05	-
ENST00000557184	ENSG00000100532	14	54510185	54531117	+	CGRRF1-008	processed_transcript	ENSG00000100532	CGRRF1	protein_coding	NA	E	ENST00000557184	-4.50692	0.13936	30.5547	3.24585e-08	1.26632e-05	-
ENST00000355105	ENSG00000159592	1	45627306	45686630	-	GPBP1L1-201	protein_coding	ENSG00000159592	GPBP1L1	protein_coding	60313	E	ENST00000355105	-8.39328	0.705009	30.5527	3.24927e-08	1.26632e-05	-
ENST00000441917	ENSG00000089053	12	121308357	121347883	-	ANAPC5-003	protein_coding	ENSG00000089053	ANAPC5	protein_coding	51433	E	ENST00000441917	7.43778	2.61935	30.5254	3.29527e-08	1.26632e-05	-
MSTRG.40945.5	NA	X	73820656	73841670	-	not_in_ref	not_in_ref	not_in_ref	not_in_ref	not_in_ref	no_EG	j	ENST00000429829	-7.12329	2.12772	30.5117	3.3186e-08	1.26632e-05	-
ENST00000508798	ENSG00000168785	4	98470367	98658570	-	TSPAN5-002	nonsense_mediated_decay	ENSG00000168785	TSPAN5	protein_coding	10098	E	ENST00000508798	-9.10926	-1.07597	30.4638	3.40157e-08	1.2754e-05	-
ENST00000590753	ENSG00000108861	17	43766131	43774768	-	DUSP3-004	protein_coding	ENSG00000108861	DUSP3	protein_coding	1845	noCuffcomp	noCuffcomp	7.49932	1.09132	30.4557	3.41586e-08	1.2754e-05	-
ENST00000478503	ENSG00000109686	4	151120287	151166320	-	SH3D19-003	retained_intron	ENSG00000109686	SH3D19	protein_coding	152503	E	ENST00000478503	4.90303	4.1224	30.4058	3.50475e-08	1.29467e-05	-
MSTRG.38853.7	NA	9	35104123	35115760	-	not_in_ref	not_in_ref	not_in_ref	not_in_ref	not_in_ref	no_EG	j	ENST00000378566	2.18737	3.11083	30.3747	3.5614e-08	1.30175e-05	-
ENST00000583057	ENSG00000101773	18	22993484	23026467	+	RBBP8-015	protein_coding	ENSG00000101773	RBBP8	protein_coding	5932	noCuffcomp	noCuffcomp	3.65713	0.271863	30.2831	3.73371e-08	1.35051e-05	-
ENST00000255882	ENSG00000241973	22	20707691	20858812	-	PI4KA-001	protein_coding	ENSG00000241973	PI4KA	protein_coding	5297	E	ENST00000255882	-9.16788	1.4749	30.2086	3.87983e-08	1.3889e-05	-
MSTRG.38755.7	NA	9	32404390	32454769	+	not_in_ref	not_in_ref	not_in_ref	not_in_ref	not_in_ref	no_EG	j	ENST00000541043	6.27029	2.42904	30.0605	4.18772e-08	1.48382e-05	-
MSTRG.32320.11	NA	5	163437669	163444965	+	not_in_ref	not_in_ref	not_in_ref	not_in_ref	not_in_ref	no_EG	j	ENST00000393929	-8.75665	1.73647	29.9892	4.34458e-08	1.52385e-05	-
ENST00000409010	ENSG00000115520	2	197453794	197474410	+	COQ10B-002	protein_coding	ENSG00000115520	COQ10B	protein_coding	80219	E	ENST00000409010	-9.61497	0.568762	29.792	4.80977e-08	1.67014e-05	-
MSTRG.17325.5	NA	17	50346254	50361151	+	not_in_ref	not_in_ref	not_in_ref	not_in_ref	not_in_ref	no_EG	j	ENST00000017003	-1.33664	0.876394	29.4816	5.64493e-08	1.94065e-05	-
MSTRG.14532.30	NA	16	18344453	18352441	-	not_in_ref	not_in_ref	not_in_ref	not_in_ref	not_in_ref	no_EG	j	ENST00000525846	-1.15873	3.4715	29.4547	5.72388e-08	1.94065e-05	-
ENST00000406567	ENSG00000138073	2	27130775	27134612	-	PREB-003	protein_coding	ENSG00000138073	PREB	protein_coding	10113	E	ENST00000406567	-7.20935	0.206746	29.4437	5.75644e-08	1.94065e-05	-
ENST00000490232	ENSG00000274012	14	49862550	49862849	-	RN7SL2-201	misc_RNA	ENSG00000274012	RN7SL2	misc_RNA	378706	noCuffcomp	noCuffcomp	-15.6833	2.92416	29.3834	5.93827e-08	1.9827e-05	-
MSTRG.34283.22	NA	6	135285381	135497242	-	not_in_ref	not_in_ref	not_in_ref	not_in_ref	not_in_ref	no_EG	j	ENST00000265602	-11.2754	-0.101818	29.3186	6.14041e-08	2.03066e-05	-
ENST00000508500	ENSG00000160789	1	156136087	156139171	+	LMNA-020	protein_coding	ENSG00000160789	LMNA	protein_coding	4000	noCuffcomp	noCuffcomp	-10.6963	3.21647	29.1257	6.78299e-08	2.222e-05	-
MSTRG.38518.6	NA	9	4834156	4928129	+	not_in_ref	not_in_ref	not_in_ref	not_in_ref	not_in_ref	no_EG	j	ENST00000381750	6.13074	2.51764	29.0149	7.18232e-08	2.33083e-05	-
MSTRG.26452.3	NA	3	9962537	10011088	-	not_in_ref	not_in_ref	not_in_ref	not_in_ref	not_in_ref	no_EG	j	ENST00000245046	5.88783	4.5173	28.8171	7.95472e-08	2.55759e-05	-
ENST00000392730	ENSG00000215030	17	17383377	17384012	-	RPL13P12-001	processed_pseudogene	ENSG00000215030	RPL13P12	processed_pseudogene	NA	E	ENST00000392730	5.41868	2.45826	28.6784	8.5452e-08	2.72224e-05	-
MSTRG.1220.3	NA	1	51354292	51508712	-	not_in_ref	not_in_ref	not_in_ref	not_in_ref	not_in_ref	no_EG	j	ENST00000371733	-7.11585	3.30386	28.5519	9.12211e-08	2.8796e-05	-
ENST00000572680	ENSG00000215041	17	7316123	7317908	-	NEURL4-013	retained_intron	ENSG00000215041	NEURL4	protein_coding	84461	E	ENST00000572680	0.948997	-1.24008	28.4638	9.5468e-08	2.98501e-05	-
ENST00000476012	ENSG00000055950	10	100981376	100987270	-	MRPL43-003	processed_transcript	ENSG00000055950	MRPL43	protein_coding	84545	E	ENST00000476012	6.2164	0.155437	28.4474	9.62796e-08	2.98501e-05	-
ENST00000441012	ENSG00000025434	11	47257962	47268784	+	NR1H3-030	protein_coding	ENSG00000025434	NR1H3	protein_coding	10062	E	ENST00000441012	-7.92573	1.80343	28.2435	1.06971e-07	3.28714e-05	-
MSTRG.22228.12	NA	2	96547402	96552634	+	not_in_ref	not_in_ref	not_in_ref	not_in_ref	not_in_ref	no_EG	j	ENST00000454558	-4.36797	0.496908	28.1961	1.09627e-07	3.3392e-05	-
MSTRG.31057.15	NA	5	57214121	57263082	+	not_in_ref	not_in_ref	not_in_ref	not_in_ref	not_in_ref	no_EG	j	ENST00000424459	-10.8632	1.41378	27.967	1.23404e-07	3.72616e-05	-
ENST00000519597	ENSG00000186106	8	100520772	100559784	-	ANKRD46-005	protein_coding	ENSG00000186106	ANKRD46	protein_coding	157567	E	ENST00000519597	-7.48312	0.687615	27.833	1.3225e-07	3.95882e-05	-
MSTRG.14168.12	NA	16	2173513	2178129	+	not_in_ref	not_in_ref	not_in_ref	not_in_ref	not_in_ref	no_EG	j	ENST00000326181	7.70708	1.84592	27.7973	1.34717e-07	3.99823e-05	-
MSTRG.35462.8	NA	7	56011068	56051375	-	not_in_ref	not_in_ref	not_in_ref	not_in_ref	not_in_ref	no_EG	j	ENST00000395471	-8.18005	0.373395	27.7117	1.40811e-07	4.14367e-05	-
MSTRG.15671.3	NA	16	88570478	88631256	+	not_in_ref	not_in_ref	not_in_ref	not_in_ref	not_in_ref	no_EG	j	ENST00000452588	-12.9715	1.80901	27.6906	1.42354e-07	4.15387e-05	-
ENST00000411912	ENSG00000115464	2	61187463	61241614	-	USP34-002	protein_coding	ENSG00000115464	USP34	protein_coding	9736	noCuffcomp	noCuffcomp	6.92865	3.03088	27.559	1.52378e-07	4.4093e-05	-
MSTRG.15295.11	NA	16	67880749	67884431	+	not_in_ref	not_in_ref	not_in_ref	not_in_ref	not_in_ref	no_EG	j	ENST00000358933	-8.53592	1.45988	27.5318	1.54531e-07	4.43466e-05	-
ENST00000502732	ENSG00000143322	1	179099327	179229601	-	ABL2-001	protein_coding	ENSG00000143322	ABL2	protein_coding	27	E	ENST00000502732	-4.21694	0.303509	27.4953	1.57478e-07	4.48218e-05	-
ENST00000299084	ENSG00000166068	15	38252326	38357249	+	SPRED1-001	protein_coding	ENSG00000166068	SPRED1	protein_coding	161742	E	ENST00000299084	-9.78467	2.68355	27.422	1.63557e-07	4.61737e-05	-
MSTRG.39912.5	NA	9	129111026	129148945	+	not_in_ref	not_in_ref	not_in_ref	not_in_ref	not_in_ref	no_EG	j	ENST00000337738	-8.47719	1.38346	27.3933	1.66005e-07	4.64868e-05	-
ENST00000465993	ENSG00000115289	2	74505043	74507151	-	PCGF1-005	processed_transcript	ENSG00000115289	PCGF1	protein_coding	NA	E	ENST00000465993	-7.83362	-1.13492	27.2	1.83457e-07	5.09628e-05	-
MSTRG.36705.18	NA	7	151076716	151080765	-	not_in_ref	not_in_ref	not_in_ref	not_in_ref	not_in_ref	no_EG	j	ENST00000297532	-6.74498	2.74413	27.0894	1.94265e-07	5.35369e-05	-
MSTRG.24155.3	NA	20	13389422	13638903	-	not_in_ref	not_in_ref	not_in_ref	not_in_ref	not_in_ref	no_EG	j	ENST00000337743	-10.3761	0.588661	27.0633	1.96904e-07	5.3837e-05	-
MSTRG.6520.1	NA	11	59636707	59666960	-	not_in_ref	not_in_ref	not_in_ref	not_in_ref	not_in_ref	no_EG	j	ENST00000300146	-15.3581	2.762	27.0117	2.02228e-07	5.46239e-05	-
MSTRG.39237.10	NA	9	88388524	88478849	+	not_in_ref	not_in_ref	not_in_ref	not_in_ref	not_in_ref	no_EG	j	ENST00000469017	7.50123	2.60954	27.005	2.02928e-07	5.46239e-05	-
ENST00000263265	ENSG00000105559	19	48837097	48868632	-	PLEKHA4-001	protein_coding	ENSG00000105559	PLEKHA4	protein_coding	57664	E	ENST00000263265	-10.9572	-0.266053	26.8848	2.15952e-07	5.76825e-05	-
MSTRG.10816.6	NA	13	108270227	108308472	+	not_in_ref	not_in_ref	not_in_ref	not_in_ref	not_in_ref	no_EG	j	ENST00000375887	-8.3482	-0.195283	26.7469	2.31925e-07	6.1476e-05	-
MSTRG.29725.18	NA	4	94455267	94668223	+	not_in_ref	not_in_ref	not_in_ref	not_in_ref	not_in_ref	no_EG	j	ENST00000615540	-23.7284	3.84657	26.6035	2.49796e-07	6.57114e-05	-
ENST00000294794	ENSG00000162745	1	161983192	162023854	-	OLFML2B-001	protein_coding	ENSG00000162745	OLFML2B	protein_coding	25903	E	ENST00000294794	-7.92549	0.984489	26.5625	2.55154e-07	6.66162e-05	-
MSTRG.36710.7	NA	7	151232537	151238827	+	not_in_ref	not_in_ref	not_in_ref	not_in_ref	not_in_ref	no_EG	j	ENST00000495645	-7.82776	1.21886	26.5479	2.57084e-07	6.66194e-05	-
ENST00000620510	ENSG00000106261	7	100023408	100041688	+	ZKSCAN1-202	protein_coding	ENSG00000106261	ZKSCAN1	protein_coding	7586	E	ENST00000620510	-7.77475	3.44106	26.5218	2.60583e-07	6.70259e-05	-
ENST00000392585	ENSG00000183484	14	105049397	105065445	-	GPR132-002	protein_coding	ENSG00000183484	GPR132	protein_coding	29933	E	ENST00000392585	-8.65559	-0.585153	26.4812	2.66111e-07	6.79034e-05	-
ENST00000566269	ENSG00000102854	16	765732	768798	+	MSLN-005	protein_coding	ENSG00000102854	MSLN	protein_coding	10232	E	ENST00000566269	-11.6021	1.60834	26.4654	2.68301e-07	6.79034e-05	-
ENST00000536159	ENSG00000164442	6	139372255	139374362	-	CITED2-201	protein_coding	ENSG00000164442	CITED2	protein_coding	10370	E	ENST00000536159	-8.35527	2.13496	26.4542	2.69861e-07	6.79034e-05	-
MSTRG.36638.2	NA	7	144258791	144287771	-	not_in_ref	not_in_ref	not_in_ref	not_in_ref	not_in_ref	no_EG	j	ENST00000483587	-8.38036	0.578652	26.3748	2.81186e-07	7.02439e-05	-
MSTRG.32743.2	NA	6	7268309	7313207	-	not_in_ref	not_in_ref	not_in_ref	not_in_ref	not_in_ref	no_EG	j	ENST00000474597	-12.1702	-0.371181	26.2803	2.95288e-07	7.28026e-05	-
MSTRG.19475.2	NA	19	14147769	14206192	-	not_in_ref	not_in_ref	not_in_ref	not_in_ref	not_in_ref	no_EG	j	ENST00000340736	5.66943	2.47975	26.2781	2.95622e-07	7.28026e-05	-
ENST00000334133	ENSG00000131378	3	16315856	16513706	-	RFTN1-001	protein_coding	ENSG00000131378	RFTN1	protein_coding	23180	E	ENST00000334133	-8.94593	4.51353	26.2376	3.01886e-07	7.38219e-05	-
MSTRG.15235.8	NA	16	66940592	66945050	+	not_in_ref	not_in_ref	not_in_ref	not_in_ref	not_in_ref	no_EG	j	ENST00000317091	3.35173	1.15236	26.1568	3.14793e-07	7.63054e-05	-
ENST00000352456	ENSG00000105323	19	41262496	41307598	+	HNRNPUL1-001	protein_coding	ENSG00000105323	HNRNPUL1	protein_coding	11100	E	ENST00000352456	6.965	4.8772	26.1467	3.16438e-07	7.63054e-05	-
ENST00000556255	ENSG00000100441	14	24435457	24438408	+	KHNYN-006	retained_intron	ENSG00000100441	KHNYN	protein_coding	23351	E	ENST00000556255	-12.9719	-0.174993	26.1173	3.21289e-07	7.68862e-05	-
ENST00000368074	ENSG00000132716	1	160215715	160262501	-	DCAF8-002	protein_coding	ENSG00000132716	DCAF8	protein_coding	50717	E	ENST00000368074	5.94708	4.65142	26.1054	3.23275e-07	7.68862e-05	-
ENST00000622724	ENSG00000054523	1	10232329	10381596	+	KIF1B-202	protein_coding	ENSG00000054523	KIF1B	protein_coding	23095	E	ENST00000622724	8.01909	1.28187	26.0106	3.39542e-07	8.02058e-05	-
ENST00000344461	ENSG00000160055	1	32216200	32222338	-	TMEM234-009	protein_coding	ENSG00000160055	TMEM234	protein_coding	56063	noCuffcomp	noCuffcomp	11.8771	-1.49677	25.9863	3.43844e-07	8.06732e-05	-
ENST00000336934	ENSG00000133121	13	33103135	33285755	-	STARD13-006	protein_coding	ENSG00000133121	STARD13	protein_coding	90627	E	ENST00000336934	6.76177	4.04272	25.8511	3.68804e-07	8.59486e-05	-
ENST00000404032	ENSG00000119777	2	27032977	27041693	+	TMEM214-002	protein_coding	ENSG00000119777	TMEM214	protein_coding	54867	E	ENST00000404032	-9.89531	2.58546	25.7898	3.80687e-07	8.81264e-05	-
ENST00000248901	ENSG00000100055	22	37282383	37315345	+	CYTH4-001	protein_coding	ENSG00000100055	CYTH4	protein_coding	27128	E	ENST00000248901	-10.615	0.836076	25.7189	3.94931e-07	9.08185e-05	-
MSTRG.17090.5	NA	17	44395297	44474890	-	not_in_ref	not_in_ref	not_in_ref	not_in_ref	not_in_ref	no_EG	j	ENST00000590041	-16.2201	2.28773	25.6509	4.09111e-07	9.34604e-05	-
MSTRG.6494.65	NA	11	57806920	57819178	+	not_in_ref	not_in_ref	not_in_ref	not_in_ref	not_in_ref	no_EG	j	ENST00000399050	0.569929	2.6717	25.6063	4.18675e-07	9.47934e-05	-
ENST00000381809	ENSG00000147853	9	4711155	4741318	-	AK3-002	protein_coding	ENSG00000147853	AK3	protein_coding	50808	E	ENST00000381809	6.28247	4.17097	25.5983	4.20406e-07	9.47934e-05	-
ENST00000584350	ENSG00000196704	17	68250446	68257153	+	AMZ2-011	nonsense_mediated_decay	ENSG00000196704	AMZ2	protein_coding	51321	noCuffcomp	noCuffcomp	-10.2172	2.70663	25.4312	4.58449e-07	0.000102705	-
MSTRG.20470.9	NA	19	49085495	49108602	+	not_in_ref	not_in_ref	not_in_ref	not_in_ref	not_in_ref	no_EG	j	ENST00000401730	8.16417	1.74864	25.3467	4.78976e-07	0.000106615	-
ENST00000430710	ENSG00000100888	14	21385194	21437243	-	CHD8-001	protein_coding	ENSG00000100888	CHD8	protein_coding	57680	E	ENST00000430710	4.94214	2.85071	25.1655	5.26163e-07	0.000116003	-
ENST00000367843	ENSG00000143164	1	167936661	168075843	+	DCAF6-011	protein_coding	ENSG00000143164	DCAF6	protein_coding	55827	E	ENST00000367843	-11.5862	1.21418	25.1593	5.27834e-07	0.000116003	-
MSTRG.3661.16	NA	1	222715104	222735196	+	not_in_ref	not_in_ref	not_in_ref	not_in_ref	not_in_ref	no_EG	j	ENST00000340934	-13.5862	2.33965	25.1348	5.34601e-07	0.000116752	-
MSTRG.31359.5	NA	5	83052846	83065096	-	not_in_ref	not_in_ref	not_in_ref	not_in_ref	not_in_ref	no_EG	j	ENST00000511450	-2.96299	5.00625	24.9822	5.78606e-07	0.000124931	-
MSTRG.4306.15	NA	10	24466647	24547703	+	not_in_ref	not_in_ref	not_in_ref	not_in_ref	not_in_ref	no_EG	j	ENST00000376454	-3.07164	1.67573	24.9801	5.79252e-07	0.000124931	-
MSTRG.19579.2	NA	19	17405722	17425318	+	not_in_ref	not_in_ref	not_in_ref	not_in_ref	not_in_ref	no_EG	j	ENST00000543795	-8.03681	0.695491	24.9546	5.86952e-07	0.000125711	-
MSTRG.15458.3	NA	16	74621462	74664680	-	not_in_ref	not_in_ref	not_in_ref	not_in_ref	not_in_ref	no_EG	j	ENST00000571750	-9.37587	0.919117	24.9443	5.90109e-07	0.000125711	-
ENST00000520427	ENSG00000213523	5	140550682	140557677	-	SRA1-004	processed_transcript	ENSG00000213523	SRA1	protein_coding	10011	E	ENST00000520427	-10.2594	-0.601268	24.892	6.06332e-07	0.00012838	-
ENST00000422445	ENSG00000103037	16	58515791	58519503	+	SETD6-004	nonsense_mediated_decay	ENSG00000103037	SETD6	protein_coding	NA	E	ENST00000422445	7.40156	0.142297	24.7438	6.54774e-07	0.000137796	-
MSTRG.18218.5	NA	18	5392382	5419794	-	not_in_ref	not_in_ref	not_in_ref	not_in_ref	not_in_ref	no_EG	j	ENST00000341928	6.52434	1.92672	24.692	6.72631e-07	0.000140701	-
MSTRG.38888.8	NA	9	36214470	36258329	-	not_in_ref	not_in_ref	not_in_ref	not_in_ref	not_in_ref	no_EG	j	ENST00000396594	8.09328	2.30185	24.6724	6.79503e-07	0.000141288	-
MSTRG.40945.12	NA	X	73820692	73831397	-	not_in_ref	not_in_ref	not_in_ref	not_in_ref	not_in_ref	no_EG	j	ENST00000429829	-7.46153	5.33576	24.5799	7.12933e-07	0.000147356	-
ENST00000398473	ENSG00000161813	12	50400899	50480004	+	LARP4-002	protein_coding	ENSG00000161813	LARP4	protein_coding	113251	E	ENST00000398473	-8.04862	3.69829	24.525	7.33528e-07	0.000150442	-
ENST00000261534	ENSG00000009830	14	77274956	77320884	-	POMT2-001	protein_coding	ENSG00000009830	POMT2	protein_coding	29954	E	ENST00000261534	-7.80901	1.76529	24.5171	7.36528e-07	0.000150442	-
ENST00000264818	ENSG00000105397	19	10350529	10378508	-	TYK2-201	protein_coding	ENSG00000105397	TYK2	protein_coding	7297	E	ENST00000264818	-0.70518	0.618234	24.4531	7.61423e-07	0.000154618	-
ENST00000303277	ENSG00000168936	4	1715952	1721358	-	TMEM129-001	protein_coding	ENSG00000168936	TMEM129	protein_coding	92305	E	ENST00000303277	-9.65799	1.51731	24.3788	7.9134e-07	0.000159759	-
ENST00000570917	ENSG00000153066	16	11679083	11690097	-	TXNDC11-006	processed_transcript	ENSG00000153066	TXNDC11	protein_coding	51061	E	ENST00000570917	-18.9634	0.0354877	24.3034	8.22927e-07	0.000165175	-
ENST00000319778	ENSG00000120616	10	32267751	32347218	-	EPC1-002	protein_coding	ENSG00000120616	EPC1	protein_coding	80314	E	ENST00000319778	-6.82139	2.06367	24.2741	8.3555e-07	0.000166745	-
ENST00000351760	ENSG00000134330	2	9474578	9488462	+	IAH1-008	nonsense_mediated_decay	ENSG00000134330	IAH1	protein_coding	NA	E	ENST00000351760	-7.46311	1.00375	24.2132	8.62405e-07	0.000171121	-
ENST00000333055	ENSG00000131446	5	180790541	180815541	-	MGAT1-001	protein_coding	ENSG00000131446	MGAT1	protein_coding	4245	E	ENST00000333055	-9.05213	2.49633	24.1773	8.78628e-07	0.000173199	-
MSTRG.23377.12	NA	2	201116784	201141602	+	not_in_ref	not_in_ref	not_in_ref	not_in_ref	not_in_ref	no_EG	j	ENST00000309955	2.2076	0.793375	24.168	8.82855e-07	0.000173199	-
ENST00000613099	ENSG00000048707	1	12230067	12512047	+	VPS13D-003	protein_coding	ENSG00000048707	VPS13D	protein_coding	55187	E	ENST00000613099	2.65255	2.03412	24.1426	8.94612e-07	0.00017452	-
ENST00000545889	ENSG00000130779	12	122271434	122364017	-	CLIP1-008	protein_coding	ENSG00000130779	CLIP1	protein_coding	6249	E	ENST00000545889	4.93534	1.89689	24.1202	9.05049e-07	0.000175569	-
ENST00000428120	ENSG00000162585	1	2184478	2194741	-	C1orf86-002	nonsense_mediated_decay	ENSG00000162585	C1orf86	protein_coding	199990	E	ENST00000428120	-8.14859	-0.624296	24.0472	9.40052e-07	0.000181346	-
MSTRG.3142.14	NA	1	179990508	180114831	+	not_in_ref	not_in_ref	not_in_ref	not_in_ref	not_in_ref	no_EG	j	ENST00000367607	-8.63315	1.1261	24.0291	9.48928e-07	0.000182047	-
MSTRG.40945.8	NA	X	73820656	73852595	-	not_in_ref	not_in_ref	not_in_ref	not_in_ref	not_in_ref	no_EG	j	ENST00000429829	-9.39413	3.11798	23.9084	1.01032e-06	0.00019276	-
MSTRG.21674.1	NA	2	55865967	55923782	-	not_in_ref	not_in_ref	not_in_ref	not_in_ref	not_in_ref	no_EG	j	ENST00000355426	-5.94723	0.430065	23.886	1.02213e-06	0.000193947	-
ENST00000504691	ENSG00000145730	5	103007559	103029730	+	PAM-008	protein_coding	ENSG00000145730	PAM	protein_coding	5066	noCuffcomp	noCuffcomp	6.55611	4.14237	23.8419	1.04583e-06	0.000197366	-
ENST00000457309	ENSG00000164924	8	100918579	100952993	-	YWHAZ-202	protein_coding	ENSG00000164924	YWHAZ	protein_coding	7534	E	ENST00000457309	-9.6262	5.7718	23.7643	1.08881e-06	0.000204367	-
ENST00000373950	ENSG00000088367	20	36092710	36230327	+	EPB41L1-010	protein_coding	ENSG00000088367	EPB41L1	protein_coding	2036	E	ENST00000373950	-8.26984	1.46684	23.6725	1.14202e-06	0.000212742	-
MSTRG.29827.6	NA	4	107613749	107654996	-	not_in_ref	not_in_ref	not_in_ref	not_in_ref	not_in_ref	no_EG	j	ENST00000265174	4.9817	2.15455	23.6663	1.14569e-06	0.000212742	-
ENST00000369038	ENSG00000143382	1	150552088	150560937	+	ADAMTSL4-001	protein_coding	ENSG00000143382	ADAMTSL4	protein_coding	54507	E	ENST00000369038	-15.8839	3.33233	23.571	1.20389e-06	0.000222361	-
MSTRG.31946.5	NA	5	138946750	139133394	-	not_in_ref	not_in_ref	not_in_ref	not_in_ref	not_in_ref	no_EG	j	ENST00000265195	4.16196	1.5797	23.482	1.26088e-06	0.000231654	-
MSTRG.27710.9	NA	3	121663228	121729950	-	not_in_ref	not_in_ref	not_in_ref	not_in_ref	not_in_ref	no_EG	j	ENST00000393667	7.14543	4.89637	23.4498	1.28214e-06	0.000234322	-
MSTRG.17573.20	NA	17	61942610	62030000	-	not_in_ref	not_in_ref	not_in_ref	not_in_ref	not_in_ref	no_EG	j	ENST00000397786	6.0049	0.978206	23.3435	1.35499e-06	0.000246338	-
ENST00000369864	ENSG00000181754	1	109504175	109509682	-	AMIGO1-001	protein_coding	ENSG00000181754	AMIGO1	protein_coding	57463	E	ENST00000369864	0.792974	0.821637	23.3094	1.37925e-06	0.000247083	-
ENST00000320027	ENSG00000120694	13	31135049	31161927	-	HSPH1-001	protein_coding	ENSG00000120694	HSPH1	protein_coding	10808	E	ENST00000320027	5.91214	1.93253	23.3065	1.38133e-06	0.000247083	-
ENST00000540960	ENSG00000111642	12	6582168	6587825	-	CHD4-001	processed_transcript	ENSG00000111642	CHD4	protein_coding	1108	noCuffcomp	noCuffcomp	5.39252	1.06538	23.3044	1.38283e-06	0.000247083	-
MSTRG.3482.14	NA	1	207347530	207360501	+	not_in_ref	not_in_ref	not_in_ref	not_in_ref	not_in_ref	no_EG	j	ENST00000314754	-8.22817	-0.272897	23.2979	1.38755e-06	0.000247083	-
ENST00000430412	ENSG00000196950	2	195657128	195737702	+	SLC39A10-003	nonsense_mediated_decay	ENSG00000196950	SLC39A10	protein_coding	57181	E	ENST00000430412	-10.1745	1.41627	23.2818	1.39919e-06	0.00024723	-
MSTRG.9199.36	NA	12	68809227	68844195	+	not_in_ref	not_in_ref	not_in_ref	not_in_ref	not_in_ref	no_EG	j	ENST00000393417	5.52386	3.22643	23.2771	1.40261e-06	0.00024723	-
ENST00000443035	ENSG00000174485	15	65659123	65792124	-	DENND4A-001	protein_coding	ENSG00000174485	DENND4A	protein_coding	10260	E	ENST00000443035	6.10437	2.86304	23.1906	1.46715e-06	0.000257111	-
ENST00000543711	ENSG00000144959	3	172630645	172711218	-	NCEH1-202	protein_coding	ENSG00000144959	NCEH1	protein_coding	57552	E	ENST00000543711	5.62685	-0.711188	23.1823	1.47348e-06	0.000257111	-
ENST00000357103	ENSG00000006831	12	1691027	1788678	+	ADIPOR2-001	protein_coding	ENSG00000006831	ADIPOR2	protein_coding	79602	E	ENST00000357103	5.22675	2.16522	23.1404	1.50593e-06	0.000261459	-
ENST00000415383	ENSG00000155229	10	97458324	97498388	-	MMS19-007	nonsense_mediated_decay	ENSG00000155229	MMS19	protein_coding	64210	E	ENST00000415383	1.43046	2.45439	23.111	1.52913e-06	0.000264167	-
ENST00000559704	ENSG00000196547	15	90918734	90921194	+	MAN2A2-025	nonsense_mediated_decay	ENSG00000196547	MAN2A2	protein_coding	4122	noCuffcomp	noCuffcomp	6.12555	1.73139	23.0175	1.6053e-06	0.000275953	-
MSTRG.19527.72	NA	19	16645061	16659161	-	not_in_ref	not_in_ref	not_in_ref	not_in_ref	not_in_ref	no_EG	j	ENST00000593991	-9.20435	-0.586657	22.9402	1.67124e-06	0.000285872	-
MSTRG.2870.2	NA	1	164555719	164851778	+	not_in_ref	not_in_ref	not_in_ref	not_in_ref	not_in_ref	no_EG	j	ENST00000420696	5.43297	4.60963	22.8857	1.7193e-06	0.000292653	-
MSTRG.7660.14	NA	11	118607677	118658025	+	not_in_ref	not_in_ref	not_in_ref	not_in_ref	not_in_ref	no_EG	j	ENST00000361417	-7.14026	1.75299	22.7824	1.81422e-06	0.000307302	-
ENST00000246657	ENSG00000126353	17	40553769	40565472	-	CCR7-001	protein_coding	ENSG00000126353	CCR7	protein_coding	1236	E	ENST00000246657	-8.88502	-1.48449	22.7502	1.84481e-06	0.000310967	-
ENST00000588328	ENSG00000124299	19	33391423	33478084	-	PEPD-009	protein_coding	ENSG00000124299	PEPD	protein_coding	5184	E	ENST00000588328	-8.80259	-1.62218	22.656	1.93756e-06	0.000325023	-
MSTRG.34663.15	NA	6	159737383	159749415	+	not_in_ref	not_in_ref	not_in_ref	not_in_ref	not_in_ref	no_EG	j	ENST00000358372	0.0830191	3.43208	22.6409	1.95285e-06	0.000326013	-
ENST00000567500	ENSG00000141076	16	69154422	69169038	+	CIRH1A-016	protein_coding	ENSG00000141076	CIRH1A	protein_coding	84916	E	ENST00000567500	-9.30875	-0.589771	22.5291	2.06981e-06	0.000343886	-
MSTRG.4139.17	NA	10	6221404	6235532	+	not_in_ref	not_in_ref	not_in_ref	not_in_ref	not_in_ref	no_EG	j	ENST00000467491	6.0518	7.38575	22.5192	2.08058e-06	0.00034403	-
MSTRG.25212.5	NA	21	33589461	33641196	-	not_in_ref	not_in_ref	not_in_ref	not_in_ref	not_in_ref	no_EG	j	ENST00000361534	-8.63057	2.2853	22.488	2.11458e-06	0.000347993	-
ENST00000322940	ENSG00000119328	9	108934181	108940968	+	FAM206A-001	protein_coding	ENSG00000119328	FAM206A	protein_coding	54942	E	ENST00000322940	-8.64401	-0.079601	22.4248	2.18537e-06	0.000357948	-
MSTRG.11737.3	NA	14	68874323	68979031	-	not_in_ref	not_in_ref	not_in_ref	not_in_ref	not_in_ref	no_EG	j	ENST00000394419	-8.80103	3.6024	22.3583	2.26232e-06	0.000368811	-
ENST00000359013	ENSG00000163513	3	30606601	30694142	+	TGFBR2-002	protein_coding	ENSG00000163513	TGFBR2	protein_coding	7048	E	ENST00000359013	-7.0268	2.27449	22.3429	2.28054e-06	0.000370044	-
ENST00000263856	ENSG00000115561	2	86503431	86563477	-	CHMP3-001	protein_coding	ENSG00000115561	CHMP3	protein_coding	100526767;51652	E	ENST00000263856	-9.57851	3.77546	22.3284	2.29784e-06	0.000371117	-
ENST00000594665	ENSG00000104880	19	7447063	7472477	+	ARHGEF18-003	protein_coding	ENSG00000104880	ARHGEF18	protein_coding	23370	E	ENST00000594665	5.7153	2.11228	22.3071	2.32352e-06	0.000373527	-
MSTRG.12313.5	NA	14	104735036	104743550	+	not_in_ref	not_in_ref	not_in_ref	not_in_ref	not_in_ref	no_EG	j	ENST00000332972	2.91806	-0.391828	22.1927	2.46605e-06	0.000394614	-
MSTRG.35495.12	NA	7	65960704	65982096	-	not_in_ref	not_in_ref	not_in_ref	not_in_ref	not_in_ref	no_EG	j	ENST00000304895	-11.6705	1.41384	22.1176	2.56444e-06	0.000408476	-
ENST00000544802	ENSG00000233369	7	73154938	73207283	+	RP11-396K3.1-002	processed_transcript	ENSG00000233369	RP11-396K3.1	transcribed_processed_pseudogene	100093631	E	ENST00000544802	6.21659	5.19492	22.093	2.59756e-06	0.000411862	-
ENST00000415497	ENSG00000112576	6	41934956	42048894	-	CCND3-007	protein_coding	ENSG00000112576	CCND3	protein_coding	896	E	ENST00000415497	-4.1965	0.731811	22.081	2.61389e-06	0.000412567	-
MSTRG.13218.3	NA	15	56630185	56668199	-	not_in_ref	not_in_ref	not_in_ref	not_in_ref	not_in_ref	no_EG	j	ENST00000559000	-9.88342	0.97779	22.0587	2.64438e-06	0.00041549	-
ENST00000579793	ENSG00000264343	1	146146521	146229026	-	NOTCH2NL-001	protein_coding	ENSG00000264343	NOTCH2NL	protein_coding	NA	E	ENST00000579793	-8.45678	0.403471	21.9818	2.75242e-06	0.000428697	-
ENST00000378364	ENSG00000198931	16	88809339	88811944	-	APRT-001	protein_coding	ENSG00000198931	APRT	protein_coding	353	E	ENST00000378364	-8.26845	3.14236	21.9814	2.75312e-06	0.000428697	-
MSTRG.7980.22	NA	12	2890971	2941106	+	not_in_ref	not_in_ref	not_in_ref	not_in_ref	not_in_ref	no_EG	j	ENST00000397132	-7.33784	0.973798	21.9298	2.82814e-06	0.000438413	-
ENST00000528651	ENSG00000175356	11	9024207	9027539	-	SCUBE2-010	protein_coding	ENSG00000175356	SCUBE2	protein_coding	57758	noCuffcomp	noCuffcomp	-10.9935	-2.76228	21.8999	2.87256e-06	0.000441583	-
ENST00000343028	ENSG00000064115	12	26973195	27014394	-	TM7SF3-001	protein_coding	ENSG00000064115	TM7SF3	protein_coding	NA	E	ENST00000343028	-14.7378	1.29082	21.8989	2.87403e-06	0.000441583	-
MSTRG.39883.4	NA	9	128729786	128755655	-	not_in_ref	not_in_ref	not_in_ref	not_in_ref	not_in_ref	no_EG	j	ENST00000291900	-10.0582	3.60802	21.8741	2.91141e-06	0.000444414	-
MSTRG.464.9	NA	1	16985960	17000291	-	not_in_ref	not_in_ref	not_in_ref	not_in_ref	not_in_ref	no_EG	j	ENST00000452699	3.34666	1.1423	21.8697	2.91805e-06	0.000444414	-
MSTRG.13991.31	NA	15	92904473	93027942	+	not_in_ref	not_in_ref	not_in_ref	not_in_ref	not_in_ref	no_EG	j	ENST00000394196	-9.9054	0.789291	21.7964	3.03165e-06	0.000458164	-
ENST00000503889	ENSG00000180104	5	453397	471936	+	EXOC3-003	nonsense_mediated_decay	ENSG00000180104	EXOC3	protein_coding	11336	E	ENST00000503889	5.13289	1.14891	21.7945	3.03472e-06	0.000458164	-
ENST00000306481	ENSG00000168944	5	123344886	123423592	-	CEP120-201	protein_coding	ENSG00000168944	CEP120	protein_coding	153241	E	ENST00000306481	4.79607	2.77496	21.752	3.10271e-06	0.00046449	-
ENST00000282869	ENSG00000152926	7	64971776	64991036	-	ZNF117-002	protein_coding	ENSG00000152926	ZNF117	protein_coding	51351	noCuffcomp	noCuffcomp	-10.8576	1.23027	21.7516	3.10338e-06	0.00046449	-
ENST00000451085	ENSG00000173114	7	111091006	111125451	+	LRRN3-201	protein_coding	ENSG00000173114	LRRN3	protein_coding	54674	E	ENST00000451085	-6.91844	-1.88771	21.6258	3.31361e-06	0.000493758	-
ENST00000515604	ENSG00000272414	4	76251721	76311120	+	FAM47E-STBD1-004	protein_coding	ENSG00000272414	FAM47E-STBD1	protein_coding	100631383	E	ENST00000515604	-7.93019	1.04364	21.612	3.33756e-06	0.000493758	-
ENST00000394566	ENSG00000172716	17	35350305	35373620	-	SLFN11-001	protein_coding	ENSG00000172716	SLFN11	protein_coding	91607	E	ENST00000394566	-10.7995	2.34374	21.6097	3.34158e-06	0.000493758	-
ENST00000475179	ENSG00000203326	19	53365713	53386581	+	ZNF525-003	protein_coding	ENSG00000203326	ZNF525	protein_coding	170958	E	ENST00000475179	3.92054	-1.12571	21.5573	3.43412e-06	0.000505281	-
MSTRG.27695.5	NA	3	120392555	120450980	-	not_in_ref	not_in_ref	not_in_ref	not_in_ref	not_in_ref	no_EG	j	ENST00000295633	0.696434	5.07709	21.5452	3.45583e-06	0.000506331	-
MSTRG.1087.8	NA	1	44653275	44673874	-	not_in_ref	not_in_ref	not_in_ref	not_in_ref	not_in_ref	no_EG	j	ENST00000372242	1.15072	1.40888	21.4472	3.63712e-06	0.000530653	-
ENST00000562075	ENSG00000064666	19	1026691	1036677	+	CNN2-006	protein_coding	ENSG00000064666	CNN2	protein_coding	1265	E	ENST00000562075	-8.65198	-0.199521	21.4227	3.68387e-06	0.000535225	-
ENST00000344604	ENSG00000106823	9	92495312	92536055	-	ECM2-001	protein_coding	ENSG00000106823	ECM2	protein_coding	1842	E	ENST00000344604	5.3643	3.5915	21.4006	3.72662e-06	0.00053918	-
ENST00000292562	ENSG00000198169	8	144721129	144755605	-	ZNF251-001	protein_coding	ENSG00000198169	ZNF251	protein_coding	90987	E	ENST00000292562	-7.90622	0.759926	21.3766	3.77352e-06	0.000543701	-
ENST00000530003	ENSG00000117676	1	26543112	26575014	+	RPS6KA1-003	protein_coding	ENSG00000117676	RPS6KA1	protein_coding	6195	E	ENST00000530003	-9.62355	0.422909	21.3291	3.86824e-06	0.000555045	-
ENST00000486276	ENSG00000136147	13	49526189	49528976	+	PHF11-017	retained_intron	ENSG00000136147	PHF11	protein_coding	51131	E	ENST00000486276	4.35346	0.77117	21.2586	4.0131e-06	0.000573461	-
ENST00000424697	ENSG00000166526	7	100069972	100081764	-	ZNF3-202	protein_coding	ENSG00000166526	ZNF3	protein_coding	7551	E	ENST00000424697	5.85005	2.28308	21.1464	4.25491e-06	0.000605523	-
ENST00000395118	ENSG00000129009	15	74174501	74176872	+	ISLR-002	protein_coding	ENSG00000129009	ISLR	protein_coding	3671	E	ENST00000395118	-7.27762	3.43238	21.1322	4.28657e-06	0.000607539	-
MSTRG.33224.23	NA	6	32184853	32190078	-	not_in_ref	not_in_ref	not_in_ref	not_in_ref	not_in_ref	no_EG	j	ENST00000375050	-8.96065	0.8054	21.1213	4.31109e-06	0.00060853	-
MSTRG.39705.5	NA	9	120388915	120395420	-	not_in_ref	not_in_ref	not_in_ref	not_in_ref	not_in_ref	no_EG	j	ENST00000473282	5.99462	-0.194277	21.0769	4.41219e-06	0.000620279	-
ENST00000375477	ENSG00000126226	13	113177611	113208666	-	PCID2-007	protein_coding	ENSG00000126226	PCID2	protein_coding	55795	E	ENST00000375477	4.12163	0.604599	20.9786	4.64433e-06	0.000650282	-
ENST00000446916	ENSG00000088812	20	3471108	3615947	+	ATRN-001	protein_coding	ENSG00000088812	ATRN	protein_coding	8455	E	ENST00000446916	-9.38187	-0.416308	20.9426	4.73258e-06	0.000659976	-
MSTRG.6707.5	NA	11	64894546	64909355	-	not_in_ref	not_in_ref	not_in_ref	not_in_ref	not_in_ref	no_EG	j	ENST00000377264	-4.01007	0.630666	20.9131	4.806e-06	0.000667534	-
MSTRG.37632.1	NA	8	70109718	70402247	-	not_in_ref	not_in_ref	not_in_ref	not_in_ref	not_in_ref	no_EG	j	ENST00000452400	5.63174	3.46693	20.8954	4.8507e-06	0.000670518	-
MSTRG.28940.6	NA	4	6641469	6642729	+	not_in_ref	not_in_ref	not_in_ref	not_in_ref	not_in_ref	no_EG	j	ENST00000617365	4.59941	4.03233	20.8893	4.8661e-06	0.000670518	-
ENST00000430088	ENSG00000185825	X	153704021	153723399	-	BCAP31-007	protein_coding	ENSG00000185825	BCAP31	protein_coding	10134	E	ENST00000430088	5.25861	-0.0153092	20.8655	4.92701e-06	0.000676227	-
ENST00000405074	ENSG00000084764	2	26970658	27027196	+	MAPRE3-002	protein_coding	ENSG00000084764	MAPRE3	protein_coding	22924	E	ENST00000405074	-8.20652	0.754257	20.843	4.98513e-06	0.00068151	-
ENST00000397147	ENSG00000100365	22	36860988	36878015	+	NCF4-002	protein_coding	ENSG00000100365	NCF4	protein_coding	4689	E	ENST00000397147	-7.93852	-0.64231	20.8253	5.03128e-06	0.000685122	-
MSTRG.28603.10	NA	3	184299258	184309050	+	not_in_ref	not_in_ref	not_in_ref	not_in_ref	not_in_ref	no_EG	j	ENST00000310118	6.14955	2.70055	20.799	5.10101e-06	0.000691904	-
ENST00000471426	ENSG00000144642	3	29281073	29435009	+	RBMS3-009	retained_intron	ENSG00000144642	RBMS3	protein_coding	27303	E	ENST00000471426	1.45932	-1.34194	20.791	5.12232e-06	0.000692092	-
ENST00000436743	ENSG00000203747	1	161541765	161550623	-	FCGR3A-201	protein_coding	ENSG00000203747	FCGR3A	protein_coding	2214	E	ENST00000436743	-12.665	0.211486	20.7436	5.2507e-06	0.000706074	-
ENST00000574671	ENSG00000184009	17	81509999	81511848	-	ACTG1-008	retained_intron	ENSG00000184009	ACTG1	protein_coding	71	E	ENST00000574671	-14.208	-0.293552	20.7378	5.26648e-06	0.000706074	-
MSTRG.4657.17	NA	10	50084067	50133504	+	not_in_ref	not_in_ref	not_in_ref	not_in_ref	not_in_ref	no_EG	j	ENST00000282633	-9.79464	2.58801	20.6524	5.50693e-06	0.000735472	-
MSTRG.35686.21	NA	7	77630409	77639490	+	not_in_ref	not_in_ref	not_in_ref	not_in_ref	not_in_ref	no_EG	j	ENST00000248594	4.45989	1.17352	20.6369	5.55159e-06	0.000738595	-
MSTRG.27828.4	NA	3	128153636	128408639	+	not_in_ref	not_in_ref	not_in_ref	not_in_ref	not_in_ref	no_EG	j	ENST00000254730	10.2044	0.358843	20.4968	5.97306e-06	0.000791635	-
MSTRG.2791.56	NA	1	160276867	160286289	-	not_in_ref	not_in_ref	not_in_ref	not_in_ref	not_in_ref	no_EG	j	ENST00000556710	6.37367	5.76181	20.4421	6.14612e-06	0.000811475	-
MSTRG.17337.20	NA	17	50464399	50474774	+	not_in_ref	not_in_ref	not_in_ref	not_in_ref	not_in_ref	no_EG	j	ENST00000427954	1.89604	1.29315	20.4231	6.20746e-06	0.000816469	-
ENST00000369486	ENSG00000143061	1	116574409	116667753	-	IGSF3-001	protein_coding	ENSG00000143061	IGSF3	protein_coding	3321	E	ENST00000369486	-7.11913	0.0791668	20.3977	6.29052e-06	0.000824271	-
ENST00000373779	ENSG00000060656	1	29236516	29326800	+	PTPRU-001	protein_coding	ENSG00000060656	PTPRU	protein_coding	10076	E	ENST00000373779	-7.0046	0.475194	20.3858	6.32973e-06	0.000826292	-
MSTRG.21660.14	NA	2	55548379	55591558	-	not_in_ref	not_in_ref	not_in_ref	not_in_ref	not_in_ref	no_EG	j	ENST00000616407	6.03022	3.64834	20.3728	6.37279e-06	0.000828797	-
ENST00000416718	ENSG00000198744	1	634376	634922	+	RP5-857K21.11-001	unprocessed_pseudogene	ENSG00000198744	RP5-857K21.11	unprocessed_pseudogene	NA	E	ENST00000416718	4.77113	5.0265	20.3601	6.41524e-06	0.000831204	-
ENST00000486234	ENSG00000115307	2	74526746	74528085	-	AUP1-009	retained_intron	ENSG00000115307	AUP1	protein_coding	550	E	ENST00000486234	-9.12593	-0.240663	20.3311	6.51344e-06	0.000840791	-
ENST00000393688	ENSG00000116337	1	109625598	109632049	+	AMPD2-012	protein_coding	ENSG00000116337	AMPD2	protein_coding	271	E	ENST00000393688	6.48988	3.28667	20.3069	6.59615e-06	0.000848314	-
ENST00000326005	ENSG00000180304	15	64687573	64703281	-	OAZ2-001	protein_coding	ENSG00000180304	OAZ2	protein_coding	4947	E	ENST00000326005	1.3537	1.24189	20.2178	6.91066e-06	0.000885483	-
MSTRG.34121.8	NA	6	117560403	117575351	-	not_in_ref	not_in_ref	not_in_ref	not_in_ref	not_in_ref	no_EG	j	ENST00000368498	6.19562	2.6255	20.2077	6.94743e-06	0.000886921	-
MSTRG.18206.10	NA	18	5238156	5246499	+	not_in_ref	not_in_ref	not_in_ref	not_in_ref	not_in_ref	no_EG	j	ENST00000582008	0.530671	2.29282	20.1986	6.98039e-06	0.000887865	-
ENST00000602784	ENSG00000103549	16	30774070	30775188	+	RNF40-020	nonsense_mediated_decay	ENSG00000103549	RNF40	protein_coding	9810	noCuffcomp	noCuffcomp	6.48133	1.78387	20.1817	7.04225e-06	0.000892464	-
ENST00000353739	ENSG00000137075	9	36336396	36400299	-	RNF38-002	protein_coding	ENSG00000137075	RNF38	protein_coding	152006	E	ENST00000353739	6.25802	4.57639	20.1542	7.14429e-06	0.000902103	-
ENST00000292357	ENSG00000187800	1	156893731	156916434	+	PEAR1-201	protein_coding	ENSG00000187800	PEAR1	protein_coding	375033	E	ENST00000292357	-6.1078	0.418754	20.1041	7.33384e-06	0.000922683	-
MSTRG.4984.22	NA	10	71790294	71815978	+	not_in_ref	not_in_ref	not_in_ref	not_in_ref	not_in_ref	no_EG	j	ENST00000224721	-8.911	1.04422	20.0922	7.3796e-06	0.000925088	-
MSTRG.21276.11	NA	2	27236782	27243786	+	not_in_ref	not_in_ref	not_in_ref	not_in_ref	not_in_ref	no_EG	j	ENST00000264705	5.08505	0.69234	20.0853	7.40646e-06	0.000925115	-
ENST00000318560	ENSG00000097007	9	130835066	130887675	+	ABL1-001	protein_coding	ENSG00000097007	ABL1	protein_coding	25	E	ENST00000318560	-7.97532	1.80371	20.0578	7.51372e-06	0.000935148	-
ENST00000619293	ENSG00000100211	22	38665595	38673844	+	CBY1-201	protein_coding	ENSG00000100211	CBY1	protein_coding	25776	noCuffcomp	noCuffcomp	4.53362	0.207171	19.9831	7.81307e-06	0.000968933	-
ENST00000496559	ENSG00000144749	3	66378798	66406213	-	LRIG1-004	processed_transcript	ENSG00000144749	LRIG1	protein_coding	26018	E	ENST00000496559	4.49396	4.20892	19.964	7.89136e-06	0.000972236	-
MSTRG.17017.37	NA	17	42862980	42874369	+	not_in_ref	not_in_ref	not_in_ref	not_in_ref	not_in_ref	no_EG	j	ENST00000566825	-7.28568	-0.906716	19.9584	7.91467e-06	0.000972236	-
ENST00000562606	ENSG00000178802	15	74890053	74896538	+	MPI-013	protein_coding	ENSG00000178802	MPI	protein_coding	4351	E	ENST00000562606	-7.42855	-1.52648	19.9562	7.92371e-06	0.000972236	-
MSTRG.50.15	NA	1	827673	859446	+	not_in_ref	not_in_ref	not_in_ref	not_in_ref	not_in_ref	no_EG	j	ENST00000449005	5.60005	1.97228	19.9262	8.04907e-06	0.000984141	-
ENST00000581161	ENSG00000176225	18	70003969	70205700	-	RTTN-003	nonsense_mediated_decay	ENSG00000176225	RTTN	protein_coding	25914	E	ENST00000581161	-5.07898	0.731088	19.9155	8.09424e-06	0.000986191	-
ENST00000616577	ENSG00000133112	13	45333471	45341284	-	TPT1-201	protein_coding	ENSG00000133112	TPT1	protein_coding	7178	E	ENST00000616577	-8.6189	2.78637	19.8864	8.21849e-06	0.000997828	-
MSTRG.26278.6	NA	22	50503261	50507637	-	not_in_ref	not_in_ref	not_in_ref	not_in_ref	not_in_ref	no_EG	j	ENST00000216080	-6.84932	0.787464	19.8574	8.34399e-06	0.00100954	-
ENST00000358689	ENSG00000197217	8	23429152	23457695	-	ENTPD4-001	protein_coding	ENSG00000197217	ENTPD4	protein_coding	9583	E	ENST00000358689	4.11153	1.1247	19.7899	8.6438e-06	0.00104218	-
ENST00000524677	ENSG00000146067	5	177519792	177532533	-	FAM193B-004	protein_coding	ENSG00000146067	FAM193B	protein_coding	54540	noCuffcomp	noCuffcomp	-6.72323	0.861747	19.747	8.84001e-06	0.00106215	-
ENST00000552645	ENSG00000050426	12	51048874	51060421	+	LETMD1-013	retained_intron	ENSG00000050426	LETMD1	protein_coding	25875	E	ENST00000552645	2.03992	3.0924	19.732	8.90971e-06	0.00106683	-
ENST00000308158	ENSG00000175309	5	178208497	178232785	-	PHYKPL-001	protein_coding	ENSG00000175309	PHYKPL	protein_coding	85007	E	ENST00000308158	-7.49603	2.61557	19.7121	9.003e-06	0.0010743	-
MSTRG.27757.11	NA	3	124762948	124878638	-	not_in_ref	not_in_ref	not_in_ref	not_in_ref	not_in_ref	no_EG	j	ENST00000296181	5.90007	3.27622	19.6072	9.51098e-06	0.00113102	-
ENST00000625284	ENSG00000198185	20	46501088	46513555	-	ZNF334-005	protein_coding	ENSG00000198185	ZNF334	protein_coding	55713	E	ENST00000625284	-5.94157	-0.900357	19.5995	9.54945e-06	0.00113172	-
ENST00000450127	ENSG00000115539	2	100568955	100572040	+	PDCL3-002	protein_coding	ENSG00000115539	PDCL3	protein_coding	NA	noCuffcomp	noCuffcomp	-7.15788	-0.874542	19.556	9.76916e-06	0.00115382	-
MSTRG.31962.10	NA	5	139562611	139623444	+	not_in_ref	not_in_ref	not_in_ref	not_in_ref	not_in_ref	no_EG	j	ENST00000398734	-8.95322	0.00194237	19.5416	9.84332e-06	0.00115864	-
ENST00000372725	ENSG00000156650	10	74825582	75032293	+	KAT6B-002	protein_coding	ENSG00000156650	KAT6B	protein_coding	23522	E	ENST00000372725	-7.23232	2.73333	19.5342	9.88133e-06	0.00115919	-
ENST00000367940	ENSG00000162745	1	161983456	162023640	-	OLFML2B-006	protein_coding	ENSG00000162745	OLFML2B	protein_coding	25903	E	ENST00000367940	-4.99162	0.322923	19.4573	1.02873e-05	0.00120274	-
ENST00000491200	ENSG00000096746	10	68337616	68343191	+	HNRNPH3-005	processed_transcript	ENSG00000096746	HNRNPH3	protein_coding	3189	E	ENST00000491200	4.66364	1.71615	19.4316	1.04266e-05	0.00121495	-
ENST00000393230	ENSG00000106459	7	129630068	129757082	+	NRF1-003	protein_coding	ENSG00000106459	NRF1	protein_coding	4899	E	ENST00000393230	-9.38563	2.44927	19.4029	1.05847e-05	0.00122924	-
MSTRG.26628.12	NA	3	29281552	30010358	+	not_in_ref	not_in_ref	not_in_ref	not_in_ref	not_in_ref	no_EG	j	ENST00000434693	7.56793	1.98283	19.3673	1.0784e-05	0.00124821	-
MSTRG.20257.2	NA	19	43731390	43747734	-	not_in_ref	not_in_ref	not_in_ref	not_in_ref	not_in_ref	no_EG	j	ENST00000270066	-7.6125	0.331501	19.3602	1.08238e-05	0.00124829	-
MSTRG.37656.23	NA	8	71961930	72056215	+	not_in_ref	not_in_ref	not_in_ref	not_in_ref	not_in_ref	no_EG	j	ENST00000518916	-8.62728	-0.365507	19.3544	1.08566e-05	0.00124829	-
MSTRG.19270.4	NA	19	10287004	10288568	+	not_in_ref	not_in_ref	not_in_ref	not_in_ref	not_in_ref	no_EG	j	ENST00000380770	-6.48145	0.816926	19.3045	1.11446e-05	0.00127718	-
MSTRG.23784.13	NA	2	231110169	231172760	+	not_in_ref	not_in_ref	not_in_ref	not_in_ref	not_in_ref	no_EG	j	ENST00000308696	5.39472	3.08254	19.1569	1.20402e-05	0.00137527	-
MSTRG.6210.1	NA	11	27365934	27472314	-	not_in_ref	not_in_ref	not_in_ref	not_in_ref	not_in_ref	no_EG	j	ENST00000379214	5.09999	5.00875	19.0923	1.24548e-05	0.00141797	-
ENST00000377346	ENSG00000171608	1	9651745	9728919	+	PIK3CD-001	protein_coding	ENSG00000171608	PIK3CD	protein_coding	5293	E	ENST00000377346	-1.24634	3.30894	19.0144	1.29733e-05	0.00147217	-
ENST00000622429	ENSG00000179361	15	74541206	74598129	+	ARID3B-201	protein_coding	ENSG00000179361	ARID3B	protein_coding	10620	E	ENST00000622429	-8.50228	0.648861	19.0078	1.30185e-05	0.00147249	-
ENST00000620065	ENSG00000275895	21	6484626	6499202	-	U2AF1-001	nonsense_mediated_decay	ENSG00000275895	U2AF1	protein_coding	102724594	E	ENST00000620065	-0.457902	0.768444	18.9878	1.31554e-05	0.00148157	-
MSTRG.7599.30	NA	11	114439546	114450261	+	not_in_ref	not_in_ref	not_in_ref	not_in_ref	not_in_ref	no_EG	j	ENST00000265881	2.07725	1.46035	18.9837	1.31841e-05	0.00148157	-
ENST00000418924	ENSG00000100599	14	92576234	92688987	+	RIN3-005	processed_transcript	ENSG00000100599	RIN3	protein_coding	79890	E	ENST00000418924	-7.74605	0.605464	18.92	1.36313e-05	0.00152688	-
MSTRG.26326.4	NA	3	3150011	3172923	-	not_in_ref	not_in_ref	not_in_ref	not_in_ref	not_in_ref	no_EG	j	ENST00000231948	4.38627	2.40802	18.891	1.38405e-05	0.00154532	-
ENST00000450168	ENSG00000166816	16	75111896	75116771	-	LDHD-002	protein_coding	ENSG00000166816	LDHD	protein_coding	197257	E	ENST00000450168	-7.47378	3.64787	18.8754	1.39543e-05	0.00155305	-
MSTRG.26018.10	NA	22	39312887	39319649	-	not_in_ref	not_in_ref	not_in_ref	not_in_ref	not_in_ref	no_EG	j	ENST00000216146	-0.84054	0.110564	18.843	1.41931e-05	0.00157457	-
MSTRG.4064.7	NA	10	988706	1019911	+	not_in_ref	not_in_ref	not_in_ref	not_in_ref	not_in_ref	no_EG	j	ENST00000360803	-4.72442	-2.54469	18.7062	1.52483e-05	0.00168625	-
ENST00000311234	ENSG00000102786	13	51365227	51452998	-	INTS6-001	protein_coding	ENSG00000102786	INTS6	protein_coding	26512	E	ENST00000311234	-7.11978	2.31345	18.6801	1.54587e-05	0.00170409	-
ENST00000456917	ENSG00000234883	21	25561909	25575168	+	MIR155HG-001	lincRNA	ENSG00000234883	MIR155HG	lincRNA	114614	E	ENST00000456917	-9.67812	0.819766	18.6595	1.56265e-05	0.00171714	-
ENST00000533919	ENSG00000167792	11	67610393	67612433	+	NDUFV1-021	nonsense_mediated_decay	ENSG00000167792	NDUFV1	protein_coding	4723	E	ENST00000533919	3.96278	2.60651	18.6434	1.57588e-05	0.00172621	-
MSTRG.22546.9	NA	2	120253451	120294710	+	not_in_ref	not_in_ref	not_in_ref	not_in_ref	not_in_ref	no_EG	j	ENST00000431732	-8.16258	0.574085	18.6033	1.6094e-05	0.00175738	-
ENST00000396330	ENSG00000104497	8	81799587	81842286	-	SNX16-201	protein_coding	ENSG00000104497	SNX16	protein_coding	64089	E	ENST00000396330	-9.9387	0.671988	18.5546	1.65107e-05	0.00179723	-
MSTRG.8079.4	NA	12	6976186	7018474	-	not_in_ref	not_in_ref	not_in_ref	not_in_ref	not_in_ref	no_EG	j	ENST00000261407	-7.62482	2.5179	18.5322	1.67058e-05	0.00181279	-
ENST00000266269	ENSG00000100105	22	31325804	31346232	-	PATZ1-001	protein_coding	ENSG00000100105	PATZ1	protein_coding	23598	E	ENST00000266269	-8.41072	0.600022	18.5185	1.68262e-05	0.00182016	-
ENST00000263012	ENSG00000103226	16	16232601	16294806	+	NOMO3-003	protein_coding	ENSG00000103226	NOMO3	protein_coding	408050	E	ENST00000263012	-6.09324	1.9657	18.46	1.73504e-05	0.00187104	-
MSTRG.1174.5	NA	1	47333941	47378832	+	not_in_ref	not_in_ref	not_in_ref	not_in_ref	not_in_ref	no_EG	j	ENST00000371873	5.6608	5.07251	18.4427	1.75091e-05	0.00188231	-
ENST00000484974	ENSG00000239969	7	102364162	102380633	+	RP11-163E9.2-003	processed_transcript	ENSG00000239969	RP11-163E9.2	transcribed_unprocessed_pseudogene	NA	E	ENST00000484974	1.87059	-0.970937	18.4102	1.78104e-05	0.00190073	-
ENST00000368667	ENSG00000010810	6	111661282	111793886	-	FYN-014	protein_coding	ENSG00000010810	FYN	protein_coding	2534	E	ENST00000368667	6.29843	1.77097	18.4095	1.7817e-05	0.00190073	-
ENST00000611957	ENSG00000167110	9	128255830	128275989	-	GOLGA2-202	protein_coding	ENSG00000167110	GOLGA2	protein_coding	2801	noCuffcomp	noCuffcomp	-6.80553	3.17762	18.4065	1.78446e-05	0.00190073	-
MSTRG.28084.5	NA	3	142306620	142370588	-	not_in_ref	not_in_ref	not_in_ref	not_in_ref	not_in_ref	no_EG	j	ENST00000264951	-9.39147	2.46067	18.3977	1.79272e-05	0.00190368	-
ENST00000593812	ENSG00000127526	19	16549831	16552333	-	SLC35E1-009	processed_transcript	ENSG00000127526	SLC35E1	protein_coding	79939	noCuffcomp	noCuffcomp	5.67374	0.378989	18.3682	1.82069e-05	0.00192749	-
MSTRG.40959.1	NA	X	73944324	74004618	+	not_in_ref	not_in_ref	not_in_ref	not_in_ref	not_in_ref	no_EG	j	ENST00000414209	-6.54437	-0.0839693	18.3368	1.85092e-05	0.00195354	-
ENST00000592571	ENSG00000130159	19	11505958	11513168	-	ECSIT-010	nonsense_mediated_decay	ENSG00000130159	ECSIT	protein_coding	51295	noCuffcomp	noCuffcomp	5.52339	2.53221	18.2776	1.90943e-05	0.00200373	-
ENST00000570616	ENSG00000124067	16	67944738	67945405	-	SLC12A4-020	nonsense_mediated_decay	ENSG00000124067	SLC12A4	protein_coding	6560	noCuffcomp	noCuffcomp	2.60464	0.548604	18.277	1.91002e-05	0.00200373	-
ENST00000577734	ENSG00000141627	18	49043804	49097493	-	DYM-018	protein_coding	ENSG00000141627	DYM	protein_coding	NA	noCuffcomp	noCuffcomp	4.66135	-0.838373	18.2632	1.92386e-05	0.00201217	-
MSTRG.20303.10	NA	19	44874379	44889197	+	not_in_ref	not_in_ref	not_in_ref	not_in_ref	not_in_ref	no_EG	j	ENST00000252483	6.14277	-0.104427	18.2476	1.93973e-05	0.00202268	-
MSTRG.31290.5	NA	5	78485217	78648617	-	not_in_ref	not_in_ref	not_in_ref	not_in_ref	not_in_ref	no_EG	j	ENST00000380345	-2.56407	3.82582	18.2038	1.98477e-05	0.00205917	-
MSTRG.31264.11	NA	5	75534931	75601190	+	not_in_ref	not_in_ref	not_in_ref	not_in_ref	not_in_ref	no_EG	j	ENST00000506928	5.78277	1.58407	18.2002	1.98859e-05	0.00205917	-
ENST00000519487	ENSG00000154582	8	73946264	73970637	-	TCEB1-006	protein_coding	ENSG00000154582	TCEB1	protein_coding	6921	E	ENST00000519487	-8.20094	1.07573	18.1964	1.99251e-05	0.00205917	-
MSTRG.16253.8	NA	17	17803761	17811360	+	not_in_ref	not_in_ref	not_in_ref	not_in_ref	not_in_ref	no_EG	j	ENST00000353383	4.20123	-1.65898	18.1657	2.02488e-05	0.00208169	-
MSTRG.32802.3	NA	6	14117809	14136896	+	not_in_ref	not_in_ref	not_in_ref	not_in_ref	not_in_ref	no_EG	j	ENST00000379153	-7.56928	2.9823	18.1644	2.0263e-05	0.00208169	-
ENST00000558233	ENSG00000196497	14	24180364	24183272	-	IPO4-013	protein_coding	ENSG00000196497	IPO4	protein_coding	79711	noCuffcomp	noCuffcomp	-0.049812	-0.0872823	18.1565	2.03471e-05	0.00208417	-
MSTRG.37126.30	NA	8	23429072	23447787	-	not_in_ref	not_in_ref	not_in_ref	not_in_ref	not_in_ref	no_EG	j	ENST00000358689	-8.3683	0.904874	18.1311	2.062e-05	0.00210591	-
MSTRG.17596.6	NA	17	64002595	64020523	-	not_in_ref	not_in_ref	not_in_ref	not_in_ref	not_in_ref	no_EG	j	ENST00000412356	-7.20471	1.31117	18.1249	2.06874e-05	0.00210659	-
MSTRG.15191.1	NA	16	58707131	58734335	-	not_in_ref	not_in_ref	not_in_ref	not_in_ref	not_in_ref	no_EG	j	ENST00000245206	-5.61693	1.35797	18.1152	2.07937e-05	0.00211122	-
MSTRG.2462.11	NA	1	151259204	151267460	+	not_in_ref	not_in_ref	not_in_ref	not_in_ref	not_in_ref	no_EG	j	ENST00000368884	-8.88152	0.384586	18.0931	2.10364e-05	0.00212964	-
ENST00000545796	ENSG00000131196	18	79400274	79529323	+	NFATC1-201	protein_coding	ENSG00000131196	NFATC1	protein_coding	4772	E	ENST00000545796	-12.1062	-0.562568	18.0494	2.15248e-05	0.00216716	-
ENST00000266304	ENSG00000167074	22	41381929	41399326	+	TEF-001	protein_coding	ENSG00000167074	TEF	protein_coding	7008	E	ENST00000266304	-7.5518	5.11102	18.0488	2.15318e-05	0.00216716	-
MSTRG.26903.5	NA	3	45917904	45995824	-	not_in_ref	not_in_ref	not_in_ref	not_in_ref	not_in_ref	no_EG	j	ENST00000535325	4.68654	3.49221	18.0384	2.16495e-05	0.00217271	-
ENST00000480673	ENSG00000162613	1	77944055	77946576	-	FUBP1-009	processed_transcript	ENSG00000162613	FUBP1	protein_coding	8880	E	ENST00000480673	-8.37072	-3.13246	17.9911	2.21945e-05	0.00222099	-
ENST00000432329	ENSG00000118260	2	207529892	207603431	+	CREB1-001	protein_coding	ENSG00000118260	CREB1	protein_coding	NA	E	ENST00000432329	-2.64097	2.57473	17.9479	2.27034e-05	0.00226538	-
MSTRG.18603.3	NA	18	48539210	48863217	+	not_in_ref	not_in_ref	not_in_ref	not_in_ref	not_in_ref	no_EG	j	ENST00000382998	4.92692	3.40373	17.926	2.29661e-05	0.00228503	-
ENST00000617871	ENSG00000010278	12	6200389	6238261	+	CD9-202	protein_coding	ENSG00000010278	CD9	protein_coding	928	E	ENST00000617871	-6.75119	-1.91639	17.9018	2.32597e-05	0.0023059	-
ENST00000556962	ENSG00000125375	14	50322542	50324291	+	ATP5S-007	retained_intron	ENSG00000125375	ATP5S	protein_coding	27109	E	ENST00000556962	3.06433	-0.574549	17.8978	2.33087e-05	0.0023059	-
ENST00000510864	ENSG00000164306	4	184694293	184694952	+	PRIMPOL-010	processed_transcript	ENSG00000164306	PRIMPOL	protein_coding	201973	E	ENST00000510864	-8.64081	-0.821699	17.8759	2.35782e-05	0.00232594	-
ENST00000579226	ENSG00000101608	18	3247481	3256227	+	MYL12A-002	protein_coding	ENSG00000101608	MYL12A	protein_coding	10627	E	ENST00000579226	0.368196	2.16851	17.8028	2.45024e-05	0.00241026	-
ENST00000318364	ENSG00000055950	10	100986276	100987515	-	MRPL43-004	protein_coding	ENSG00000055950	MRPL43	protein_coding	84545	E	ENST00000318364	1.69583	2.15308	17.7963	2.45857e-05	0.00241162	-
ENST00000553774	ENSG00000125375	14	50321533	50324116	+	ATP5S-009	retained_intron	ENSG00000125375	ATP5S	protein_coding	27109	E	ENST00000553774	-5.49251	-0.231559	17.7718	2.49053e-05	0.00243086	-
ENST00000267229	ENSG00000139746	13	79319954	79405788	-	RBM26-002	protein_coding	ENSG00000139746	RBM26	protein_coding	64062	noCuffcomp	noCuffcomp	-10.9104	2.8711	17.7705	2.49219e-05	0.00243086	-
MSTRG.3032.8	NA	1	172553330	172612112	+	not_in_ref	not_in_ref	not_in_ref	not_in_ref	not_in_ref	no_EG	j	ENST00000263688	-4.98378	1.15305	17.7331	2.54171e-05	0.00247222	-
ENST00000361842	ENSG00000132530	17	6755840	6775647	+	XAF1-001	protein_coding	ENSG00000132530	XAF1	protein_coding	54739	E	ENST00000361842	-10.5166	1.59319	17.6971	2.59024e-05	0.00251239	-
ENST00000289431	ENSG00000158480	20	49903391	49915508	-	SPATA2-001	protein_coding	ENSG00000158480	SPATA2	protein_coding	9825	E	ENST00000289431	-4.02806	0.693192	17.6825	2.61023e-05	0.00252225	-
MSTRG.37583.3	NA	8	66138706	66140711	-	not_in_ref	not_in_ref	not_in_ref	not_in_ref	not_in_ref	no_EG	i	ENST00000353317	-7.04044	3.38142	17.679	2.61494e-05	0.00252225	-
ENST00000472434	ENSG00000143537	1	155051354	155062768	+	ADAM15-003	processed_transcript	ENSG00000143537	ADAM15	protein_coding	8751	E	ENST00000472434	5.68608	1.38218	17.6541	2.64947e-05	0.00254667	-
ENST00000463972	ENSG00000112473	6	33202255	33204439	+	SLC39A7-005	processed_transcript	ENSG00000112473	SLC39A7	protein_coding	7922	E	ENST00000463972	5.26697	2.96925	17.6502	2.65492e-05	0.00254667	-
ENST00000253934	ENSG00000131634	16	1528688	1555580	+	TMEM204-001	protein_coding	ENSG00000131634	TMEM204	protein_coding	79652	E	ENST00000253934	-7.43216	0.133788	17.5845	2.74826e-05	0.00262894	-
ENST00000568377	ENSG00000205084	16	75538151	75556238	-	TMEM231-005	protein_coding	ENSG00000205084	TMEM231	protein_coding	79583	E	ENST00000568377	5.86128	1.35772	17.5511	2.79693e-05	0.00266815	-
ENST00000605337	ENSG00000116221	1	54200196	54225464	+	MRPL37-005	protein_coding	ENSG00000116221	MRPL37	protein_coding	51253	E	ENST00000605337	-8.41623	-0.604475	17.4968	2.87796e-05	0.00273793	-
MSTRG.12765.24	NA	15	25370567	25408623	-	not_in_ref	not_in_ref	not_in_ref	not_in_ref	not_in_ref	no_EG	j	ENST00000566215	5.73119	1.06715	17.4802	2.90311e-05	0.0027543	-
ENST00000546020	ENSG00000178921	17	8266006	8270491	+	PFAS-004	protein_coding	ENSG00000178921	PFAS	protein_coding	5198	E	ENST00000546020	-6.9144	1.20025	17.4542	2.9432e-05	0.00278473	-
MSTRG.4598.6	NA	10	47967487	47991850	-	not_in_ref	not_in_ref	not_in_ref	not_in_ref	not_in_ref	no_EG	j	ENST00000613389	-6.71856	2.05372	17.4392	2.96642e-05	0.00279907	-
ENST00000555353	ENSG00000053254	14	89162362	89619149	-	FOXN3-001	protein_coding	ENSG00000053254	FOXN3	protein_coding	1112	E	ENST00000555353	4.64499	0.359258	17.3857	3.05106e-05	0.00287114	-
ENST00000450991	ENSG00000089818	12	8082268	8097769	+	NECAP1-003	nonsense_mediated_decay	ENSG00000089818	NECAP1	protein_coding	25977	E	ENST00000450991	5.04276	1.35689	17.3783	3.06311e-05	0.00287469	-
MSTRG.41574.9	NA	X	154348648	154365207	-	not_in_ref	not_in_ref	not_in_ref	not_in_ref	not_in_ref	no_EG	j	ENST00000369850	4.27919	5.48351	17.3653	3.08407e-05	0.00288656	-
MSTRG.6695.8	NA	11	64796637	64797485	-	not_in_ref	not_in_ref	not_in_ref	not_in_ref	not_in_ref	no_EG	j	ENST00000294066	0.646458	-0.909639	17.3512	3.10697e-05	0.00290018	-
MSTRG.26614.6	NA	3	28321117	28348972	-	not_in_ref	not_in_ref	not_in_ref	not_in_ref	not_in_ref	no_EG	j	ENST00000295748	5.69449	2.83675	17.3274	3.14612e-05	0.00292885	-
ENST00000588385	ENSG00000105254	19	36115813	36125709	+	TBCB-009	protein_coding	ENSG00000105254	TBCB	protein_coding	1155	E	ENST00000588385	-5.16809	-1.81231	17.3188	3.1605e-05	0.00293381	-
ENST00000512148	ENSG00000205403	4	109740724	109801985	-	CFI-001	protein_coding	ENSG00000205403	CFI	protein_coding	3426	E	ENST00000512148	-8.53623	1.76183	17.3131	3.17e-05	0.00293381	-
ENST00000371083	ENSG00000079739	1	63623093	63660221	+	PGM1-002	protein_coding	ENSG00000079739	PGM1	protein_coding	5236	E	ENST00000371083	-7.82612	-1.64483	17.309	3.1768e-05	0.00293381	-
MSTRG.2553.16	NA	1	153618804	153634270	-	not_in_ref	not_in_ref	not_in_ref	not_in_ref	not_in_ref	no_EG	j	ENST00000497086	-4.07059	-0.868749	17.2979	3.19544e-05	0.00294215	-
ENST00000409857	ENSG00000005436	2	75664419	75710892	-	GCFC2-004	protein_coding	ENSG00000005436	GCFC2	protein_coding	6936	E	ENST00000409857	-6.20163	0.819062	17.2935	3.20278e-05	0.00294215	-
ENST00000464520	ENSG00000107331	9	137007657	137009183	-	ABCA2-023	retained_intron	ENSG00000107331	ABCA2	protein_coding	20	E	ENST00000464520	3.94884	0.659324	17.2707	3.24144e-05	0.00296981	-
MSTRG.36540.5	NA	7	140023786	140058010	-	not_in_ref	not_in_ref	not_in_ref	not_in_ref	not_in_ref	no_EG	j	ENST00000263549	-9.46812	2.37531	17.1999	3.36458e-05	0.00307452	-
ENST00000371893	ENSG00000137216	6	44135033	44155519	+	TMEM63B-004	protein_coding	ENSG00000137216	TMEM63B	protein_coding	55362	E	ENST00000371893	6.26596	2.50373	17.1674	3.42262e-05	0.00311935	-
MSTRG.17406.24	NA	17	57111418	57121344	+	not_in_ref	not_in_ref	not_in_ref	not_in_ref	not_in_ref	no_EG	j	ENST00000621116	4.86901	3.65496	17.142	3.46868e-05	0.00315304	-
MSTRG.39703.5	NA	9	120843226	120854390	+	not_in_ref	not_in_ref	not_in_ref	not_in_ref	not_in_ref	no_EG	j	ENST00000588973	-7.39847	-0.314114	17.1117	3.52452e-05	0.00319545	-
ENST00000379340	ENSG00000168255	7	102537919	102572539	-	POLR2J3-003	nonsense_mediated_decay	ENSG00000168255	POLR2J3	protein_coding	548644	E	ENST00000379340	-11.6528	1.30468	17.1044	3.53805e-05	0.00319936	-
MSTRG.21304.8	NA	2	28393144	28417312	+	not_in_ref	not_in_ref	not_in_ref	not_in_ref	not_in_ref	no_EG	j	ENST00000264716	-6.98132	2.97137	17.0341	3.67137e-05	0.00331129	-
ENST00000278224	ENSG00000110619	11	3000929	3057418	-	CARS-002	protein_coding	ENSG00000110619	CARS	protein_coding	833	E	ENST00000278224	-5.81556	1.91157	17.0128	3.71288e-05	0.00334006	-
MSTRG.40629.4	NA	X	47218233	47229757	+	not_in_ref	not_in_ref	not_in_ref	not_in_ref	not_in_ref	no_EG	j	ENST00000622098	-7.755	-0.228134	16.9947	3.74842e-05	0.00336331	-
ENST00000230914	ENSG00000112996	5	44815219	44820428	+	MRPS30-003	processed_transcript	ENSG00000112996	MRPS30	protein_coding	10884	noCuffcomp	noCuffcomp	-12.817	1.50846	16.989	3.75974e-05	0.00336477	-
MSTRG.34993.2	NA	7	23105758	23175375	+	not_in_ref	not_in_ref	not_in_ref	not_in_ref	not_in_ref	no_EG	j	ENST00000521082	-8.32777	2.53041	16.9712	3.79506e-05	0.00338765	-
MSTRG.6566.7	NA	11	61402650	61429230	-	not_in_ref	not_in_ref	not_in_ref	not_in_ref	not_in_ref	no_EG	j	ENST00000340437	5.27539	3.32215	16.9466	3.84464e-05	0.00342311	-
ENST00000322897	ENSG00000134265	18	10526034	10552760	+	NAPG-001	protein_coding	ENSG00000134265	NAPG	protein_coding	8774	E	ENST00000322897	4.96868	1.75867	16.9406	3.85679e-05	0.00342515	-
ENST00000296783	ENSG00000164329	5	79612573	79686648	+	PAPD4-001	protein_coding	ENSG00000164329	PAPD4	protein_coding	167153	E	ENST00000296783	-5.82613	2.56253	16.9283	3.88195e-05	0.0034387	-
MSTRG.11798.8	NA	14	70907664	71115382	+	not_in_ref	not_in_ref	not_in_ref	not_in_ref	not_in_ref	no_EG	j	ENST00000304743	-10.5497	5.41127	16.9157	3.90778e-05	0.00345277	-
ENST00000544964	ENSG00000072110	14	68879046	68890142	-	ACTN1-019	protein_coding	ENSG00000072110	ACTN1	protein_coding	87	E	ENST00000544964	-7.38528	0.725194	16.9022	3.93559e-05	0.00346852	-
ENST00000474223	ENSG00000130066	X	23784753	23786000	+	SAT1-006	processed_transcript	ENSG00000130066	SAT1	protein_coding	6303	noCuffcomp	noCuffcomp	5.2843	3.10363	16.8573	4.02976e-05	0.00353798	-
ENST00000614500	ENSG00000116117	2	204965152	205620162	+	PARD3B-202	protein_coding	ENSG00000116117	PARD3B	protein_coding	117583	noCuffcomp	noCuffcomp	-8.74757	1.94481	16.855	4.03479e-05	0.00353798	-
MSTRG.21792.4	NA	2	65310851	65377750	-	not_in_ref	not_in_ref	not_in_ref	not_in_ref	not_in_ref	no_EG	j	ENST00000356388	5.16935	2.07841	16.826	4.09681e-05	0.00358332	-
ENST00000421699	ENSG00000167110	9	128255829	128275989	-	GOLGA2-004	protein_coding	ENSG00000167110	GOLGA2	protein_coding	2801	E	ENST00000421699	-6.32984	1.17473	16.812	4.12709e-05	0.00360073	-
ENST00000614374	ENSG00000197885	3	23892083	23910925	-	NKIRAS1-201	protein_coding	ENSG00000197885	NKIRAS1	protein_coding	28512	E	ENST00000614374	5.70919	1.48145	16.7949	4.16452e-05	0.00362428	-
ENST00000257694	ENSG00000135241	7	108471555	108526194	-	PNPLA8-001	protein_coding	ENSG00000135241	PNPLA8	protein_coding	50640	E	ENST00000257694	-9.72487	2.93592	16.7095	4.35621e-05	0.00378162	-
ENST00000401827	ENSG00000205268	8	65717510	65841952	-	PDE7A-001	protein_coding	ENSG00000205268	PDE7A	protein_coding	NA	E	ENST00000401827	-8.57929	-1.32466	16.6885	4.40471e-05	0.00380377	-
MSTRG.19739.1	NA	19	21570036	21573046	-	not_in_ref	not_in_ref	not_in_ref	not_in_ref	not_in_ref	no_EG	j	ENST00000596996	2.48671	-0.647748	16.6866	4.40921e-05	0.00380377	-
ENST00000351439	ENSG00000115252	2	182167887	182427048	-	PDE1A-201	protein_coding	ENSG00000115252	PDE1A	protein_coding	5136	E	ENST00000351439	4.62763	1.58619	16.6843	4.41459e-05	0.00380377	-
MSTRG.17061.6	NA	17	43484140	43525670	+	not_in_ref	not_in_ref	not_in_ref	not_in_ref	not_in_ref	no_EG	j	ENST00000262415	4.92447	1.90027	16.6686	4.45111e-05	0.00382201	-
MSTRG.5110.12	NA	10	87927548	87971856	+	not_in_ref	not_in_ref	not_in_ref	not_in_ref	not_in_ref	no_EG	j	ENST00000371953	-6.13543	1.30847	16.6658	4.45776e-05	0.00382201	-
ENST00000610317	ENSG00000221817	10	73496290	73504717	+	PPP3CB-AS1-012	antisense	ENSG00000221817	PPP3CB-AS1	processed_transcript	NA	E	ENST00000610317	-5.82957	-1.81676	16.6403	4.51816e-05	0.00386425	-
ENST00000609923	ENSG00000122912	10	68478001	68527474	-	SLC25A16-002	protein_coding	ENSG00000122912	SLC25A16	protein_coding	NA	E	ENST00000609923	-7.0043	2.35026	16.6296	4.54373e-05	0.00387108	-
MSTRG.40871.9	NA	X	68506235	68537266	+	not_in_ref	not_in_ref	not_in_ref	not_in_ref	not_in_ref	no_EG	j	ENST00000462683	-5.18205	3.36868	16.6276	4.54844e-05	0.00387108	-
ENST00000553708	ENSG00000100968	14	24368341	24379604	+	NFATC4-016	protein_coding	ENSG00000100968	NFATC4	protein_coding	4776	noCuffcomp	noCuffcomp	-8.73933	-0.241449	16.6146	4.57965e-05	0.00388811	-
ENST00000479802	ENSG00000231500	6	33275866	33276510	+	RPS18-008	retained_intron	ENSG00000231500	RPS18	protein_coding	6222	E	ENST00000479802	4.95119	3.56155	16.5884	4.64353e-05	0.00393273	-
ENST00000485852	ENSG00000164904	5	126544739	126550164	-	ALDH7A1-008	retained_intron	ENSG00000164904	ALDH7A1	protein_coding	501	E	ENST00000485852	-7.0105	0.183798	16.5545	4.72725e-05	0.0039939	-
MSTRG.16836.7	NA	17	38765722	38799522	-	not_in_ref	not_in_ref	not_in_ref	not_in_ref	not_in_ref	no_EG	j	ENST00000619039	-8.1768	2.22552	16.5409	4.76113e-05	0.00401212	-
ENST00000261654	ENSG00000111452	12	130953907	131141247	+	GPR133-001	protein_coding	ENSG00000111452	GPR133	protein_coding	283383	E	ENST00000261654	-7.23542	1.25989	16.5366	4.77194e-05	0.00401212	-
ENST00000460236	ENSG00000129292	8	132817408	132847580	+	PHF20L1-014	nonsense_mediated_decay	ENSG00000129292	PHF20L1	protein_coding	51105	noCuffcomp	noCuffcomp	-5.69669	2.0624	16.471	4.93988e-05	0.0041433	-
ENST00000553325	ENSG00000126214	14	103675552	103686200	+	KLC1-030	protein_coding	ENSG00000126214	KLC1	protein_coding	3831	noCuffcomp	noCuffcomp	-8.20986	-0.959514	16.4275	5.05464e-05	0.00422933	-
ENST00000383177	ENSG00000166278	6	31927763	31945624	+	C2-003	protein_coding	ENSG00000166278	C2	protein_coding	717	E	ENST00000383177	-5.23805	2.03736	16.4148	5.08872e-05	0.00424762	-
ENST00000463153	ENSG00000011198	3	43717668	43734371	+	ABHD5-007	processed_transcript	ENSG00000011198	ABHD5	protein_coding	NA	E	ENST00000463153	5.38553	1.66613	16.3793	5.18471e-05	0.00431736	-
MSTRG.37126.1	NA	8	23297180	23457578	-	not_in_ref	not_in_ref	not_in_ref	not_in_ref	not_in_ref	no_EG	j	ENST00000389131	-5.6185	2.4679	16.369	5.21301e-05	0.00433054	-
MSTRG.10310.9	NA	13	32632058	32778085	+	not_in_ref	not_in_ref	not_in_ref	not_in_ref	not_in_ref	no_EG	j	ENST00000315596	-7.84828	1.52326	16.3531	5.25699e-05	0.00434567	-
ENST00000556184	ENSG00000100650	14	69767172	69771642	+	SRSF5-006	retained_intron	ENSG00000100650	SRSF5	protein_coding	6430	E	ENST00000556184	-7.06998	1.62178	16.3519	5.26036e-05	0.00434567	-
ENST00000264868	ENSG00000091490	4	25747433	25863595	-	SEL1L3-001	protein_coding	ENSG00000091490	SEL1L3	protein_coding	23231	E	ENST00000264868	-10.313	-0.328698	16.3489	5.26877e-05	0.00434567	-
ENST00000484746	ENSG00000058668	1	203727468	203744080	+	ATP2B4-003	nonsense_mediated_decay	ENSG00000058668	ATP2B4	protein_coding	493	noCuffcomp	noCuffcomp	5.13173	5.07656	16.3429	5.28548e-05	0.00434912	-
MSTRG.35154.7	NA	7	32916884	32931274	-	not_in_ref	not_in_ref	not_in_ref	not_in_ref	not_in_ref	no_EG	j	ENST00000381639	-1.0197	-0.100793	16.3026	5.39896e-05	0.004432	-
MSTRG.13331.26	NA	15	63048569	63071884	+	not_in_ref	not_in_ref	not_in_ref	not_in_ref	not_in_ref	no_EG	j	ENST00000357980	-6.58528	2.29995	16.2869	5.4438e-05	0.00444891	-
MSTRG.10037.10	NA	12	131711199	131725609	+	not_in_ref	not_in_ref	not_in_ref	not_in_ref	not_in_ref	no_EG	j	ENST00000541286	5.06	0.835912	16.2828	5.45575e-05	0.00444891	-
MSTRG.10198.12	NA	13	26212978	26222209	-	not_in_ref	not_in_ref	not_in_ref	not_in_ref	not_in_ref	no_EG	j	ENST00000468480	3.41197	-0.563125	16.282	5.458e-05	0.00444891	-
MSTRG.4584.11	NA	10	47467998	47484016	-	not_in_ref	not_in_ref	not_in_ref	not_in_ref	not_in_ref	no_EG	j	ENST00000611843	-8.78372	0.906893	16.2703	5.49172e-05	0.00445901	-
ENST00000557154	ENSG00000100650	14	69767124	69771991	+	SRSF5-002	protein_coding	ENSG00000100650	SRSF5	protein_coding	6430	noCuffcomp	noCuffcomp	4.65512	3.42882	16.2675	5.49993e-05	0.00445901	-
ENST00000504114	ENSG00000244754	13	32432787	32538686	-	N4BP2L2-004	protein_coding	ENSG00000244754	N4BP2L2	protein_coding	10443	E	ENST00000504114	-7.87074	0.888352	16.2603	5.52098e-05	0.00445901	-
ENST00000373469	ENSG00000132792	20	37777273	37872129	+	CTNNBL1-004	protein_coding	ENSG00000132792	CTNNBL1	protein_coding	56259	E	ENST00000373469	5.11126	1.52949	16.2568	5.53122e-05	0.00445901	-
ENST00000491511	ENSG00000144815	3	101779442	101827392	+	NXPE3-001	protein_coding	ENSG00000144815	NXPE3	protein_coding	91775	E	ENST00000491511	4.07481	0.425832	16.2556	5.5346e-05	0.00445901	-
ENST00000460031	ENSG00000117385	1	42746374	42766989	-	P3H1-009	retained_intron	ENSG00000117385	P3H1	protein_coding	64175	E	ENST00000460031	-1.37824	1.26093	16.2349	5.59532e-05	0.00449749	-
MSTRG.39899.6	NA	9	129084686	129090438	+	not_in_ref	not_in_ref	not_in_ref	not_in_ref	not_in_ref	no_EG	j	ENST00000372546	-7.49204	1.22155	16.2267	5.61978e-05	0.00450454	-
MSTRG.15678.1	NA	16	88651935	88660918	-	not_in_ref	not_in_ref	not_in_ref	not_in_ref	not_in_ref	no_EG	j	ENST00000301012	-7.3603	1.26608	16.2232	5.63003e-05	0.00450454	-
MSTRG.32467.8	NA	5	176346065	176361731	-	not_in_ref	not_in_ref	not_in_ref	not_in_ref	not_in_ref	no_EG	j	ENST00000298569	-9.30194	3.0359	16.1867	5.73958e-05	0.00458164	-
ENST00000447873	ENSG00000127990	7	94585257	94656166	-	SGCE-005	protein_coding	ENSG00000127990	SGCE	protein_coding	8910	E	ENST00000447873	-7.79686	1.73258	16.1357	5.89624e-05	0.00469589	-
ENST00000514151	ENSG00000172869	5	119105223	119129332	+	DMXL1-011	processed_transcript	ENSG00000172869	DMXL1	protein_coding	1657	noCuffcomp	noCuffcomp	-7.58156	-1.20072	16.1258	5.92708e-05	0.00470704	-
MSTRG.13792.17	NA	15	85067029	85139126	+	not_in_ref	not_in_ref	not_in_ref	not_in_ref	not_in_ref	no_EG	j	ENST00000310298	5.54835	1.8452	16.1225	5.93735e-05	0.00470704	-
MSTRG.10577.10	NA	13	52617633	52643767	+	not_in_ref	not_in_ref	not_in_ref	not_in_ref	not_in_ref	no_EG	j	ENST00000509685	-7.79482	-0.139774	16.1109	5.97407e-05	0.00472537	-
ENST00000567607	ENSG00000140682	16	31473426	31477958	+	TGFB1I1-004	protein_coding	ENSG00000140682	TGFB1I1	protein_coding	7041	E	ENST00000567607	-10.4749	2.04759	16.0949	6.02461e-05	0.00475451	-
ENST00000219345	ENSG00000103066	16	68245344	68261062	+	PLA2G15-001	protein_coding	ENSG00000103066	PLA2G15	protein_coding	23659	E	ENST00000219345	-10.2306	2.77425	16.0894	6.04207e-05	0.00475748	-
MSTRG.41360.5	NA	X	123960560	124102499	+	not_in_ref	not_in_ref	not_in_ref	not_in_ref	not_in_ref	no_EG	j	ENST00000218089	5.20982	3.52667	16.0536	6.15743e-05	0.00483734	-
MSTRG.11635.5	NA	14	61280953	61550980	+	not_in_ref	not_in_ref	not_in_ref	not_in_ref	not_in_ref	no_EG	j	ENST00000332981	-6.51491	-0.283962	16.048	6.17556e-05	0.00484064	-
MSTRG.36060.1	NA	7	102480477	102572521	-	not_in_ref	not_in_ref	not_in_ref	not_in_ref	not_in_ref	no_EG	j	ENST00000481893	-5.4423	0.919659	16.0236	6.25562e-05	0.00489234	-
MSTRG.33478.5	NA	6	41789974	41840959	-	not_in_ref	not_in_ref	not_in_ref	not_in_ref	not_in_ref	no_EG	j	ENST00000373010	4.08401	1.25562	16.0096	6.30233e-05	0.0049178	-
MSTRG.34879.8	NA	7	7215051	7248556	+	not_in_ref	not_in_ref	not_in_ref	not_in_ref	not_in_ref	no_EG	j	ENST00000436587	0.54957	2.19884	16.0004	6.3329e-05	0.00493058	-
ENST00000496365	ENSG00000068438	X	48479038	48486311	+	FTSJ1-007	processed_transcript	ENSG00000068438	FTSJ1	protein_coding	24140	noCuffcomp	noCuffcomp	4.17304	0.29328	15.9747	6.41943e-05	0.00498676	-
MSTRG.38350.1	NA	8	143574785	143577915	-	not_in_ref	not_in_ref	not_in_ref	not_in_ref	not_in_ref	no_EG	j	ENST00000449291	-6.36181	2.89451	15.9625	6.46095e-05	0.00500782	-
ENST00000393313	ENSG00000048405	7	127370043	127392691	-	ZNF800-002	protein_coding	ENSG00000048405	ZNF800	protein_coding	168850	E	ENST00000393313	-0.0258051	1.10801	15.9262	6.58602e-05	0.00509338	-
ENST00000372742	ENSG00000125962	X	102601137	102604153	+	ARMCX5-005	protein_coding	ENSG00000125962	ARMCX5	protein_coding	64860	E	ENST00000372742	5.63651	1.79417	15.9139	6.62891e-05	0.00511516	-
ENST00000341502	ENSG00000150527	14	39267246	39388513	+	CTAGE5-015	protein_coding	ENSG00000150527	CTAGE5	protein_coding	4253	E	ENST00000341502	0.29011	-0.399947	15.9019	6.67126e-05	0.00513643	-
MSTRG.134.4	NA	1	1751232	1756327	-	not_in_ref	not_in_ref	not_in_ref	not_in_ref	not_in_ref	no_EG	j	ENST00000378625	-17.0264	1.89111	15.8962	6.69131e-05	0.00514047	-
ENST00000545521	ENSG00000103495	16	29806106	29811160	+	MAZ-005	protein_coding	ENSG00000103495	MAZ	protein_coding	4150	E	ENST00000545521	-7.38481	3.41077	15.8772	6.75883e-05	0.00518088	-
ENST00000548386	ENSG00000196531	12	56712440	56713582	-	NACA-016	processed_transcript	ENSG00000196531	NACA	protein_coding	4666	noCuffcomp	noCuffcomp	4.48693	-0.601925	15.8618	6.81397e-05	0.00521164	-
MSTRG.33633.9	NA	6	53065503	53097888	+	not_in_ref	not_in_ref	not_in_ref	not_in_ref	not_in_ref	no_EG	j	ENST00000323557	-12.4242	1.03168	15.8562	6.83417e-05	0.0052156	-
ENST00000372836	ENSG00000137161	6	42929200	42939287	+	CNPY3-001	protein_coding	ENSG00000137161	CNPY3	protein_coding	10695	E	ENST00000372836	-6.39681	1.22654	15.8439	6.87879e-05	0.00523814	-
MSTRG.18766.4	NA	18	70290205	70330117	+	not_in_ref	not_in_ref	not_in_ref	not_in_ref	not_in_ref	no_EG	j	ENST00000397942	5.7302	2.00036	15.8065	7.01597e-05	0.00532099	-
ENST00000514678	ENSG00000182923	3	134547387	134575013	+	CEP63-012	protein_coding	ENSG00000182923	CEP63	protein_coding	80254	noCuffcomp	noCuffcomp	4.74472	0.378065	15.8059	7.01824e-05	0.00532099	-
ENST00000372691	ENSG00000102409	X	103215124	103217099	+	BEX4-002	protein_coding	ENSG00000102409	BEX4	protein_coding	56271	E	ENST00000372691	3.75002	1.83662	15.7945	7.06083e-05	0.00533734	-
ENST00000311601	ENSG00000174705	5	172333499	172454523	-	SH3PXD2B-001	protein_coding	ENSG00000174705	SH3PXD2B	protein_coding	285590	E	ENST00000311601	-7.67949	1.71813	15.7908	7.07458e-05	0.00533734	-
ENST00000607145	ENSG00000271895	1	11029659	11030528	+	RP4-635E18.8-001	antisense	ENSG00000271895	RP4-635E18.8	antisense	NA	E	ENST00000607145	-5.88532	-1.3741	15.7878	7.08591e-05	0.00533734	-
ENST00000465829	ENSG00000170667	7	102483144	102517781	-	RASA4B-001	protein_coding	ENSG00000170667	RASA4B	protein_coding	100271927	E	ENST00000465829	-0.957723	-0.700308	15.7661	7.1677e-05	0.00538609	-
ENST00000490035	ENSG00000185565	3	115802388	116445531	-	LSAMP-001	protein_coding	ENSG00000185565	LSAMP	protein_coding	4045	E	ENST00000490035	-7.83394	0.972477	15.7624	7.18166e-05	0.00538609	-
ENST00000440943	ENSG00000078618	1	51789191	51814071	-	NRD1-003	protein_coding	ENSG00000078618	NRD1	protein_coding	4898	noCuffcomp	noCuffcomp	5.00599	3.45292	15.7499	7.22911e-05	0.00540999	-
ENST00000394709	ENSG00000126803	14	64535905	64546173	+	HSPA2-001	protein_coding	ENSG00000126803	HSPA2	protein_coding	3306	E	ENST00000394709	-6.63793	-1.8232	15.6783	7.50803e-05	0.00560664	-
MSTRG.19252.3	NA	19	9959561	9973430	-	not_in_ref	not_in_ref	not_in_ref	not_in_ref	not_in_ref	no_EG	j	ENST00000264828	4.41536	0.970734	15.6708	7.53805e-05	0.00561698	-
MSTRG.2347.4	NA	1	149054033	149103512	-	not_in_ref	not_in_ref	not_in_ref	not_in_ref	not_in_ref	no_EG	j	ENST00000615421	-9.06768	2.67327	15.6591	7.58486e-05	0.00563976	-
ENST00000299381	ENSG00000166295	10	72216048	72235860	+	ANAPC16-001	protein_coding	ENSG00000166295	ANAPC16	protein_coding	119504	E	ENST00000299381	5.00157	3.66714	15.6086	7.78993e-05	0.00577986	-
ENST00000424948	ENSG00000234694	1	43354684	43358658	-	RP1-92O14.3-001	antisense	ENSG00000234694	RP1-92O14.3	antisense	NA	E	ENST00000424948	-7.75255	-1.05726	15.5841	7.8916e-05	0.00584282	-
MSTRG.25034.3	NA	21	25724480	25735585	-	not_in_ref	not_in_ref	not_in_ref	not_in_ref	not_in_ref	no_EG	j	ENST00000400094	5.30574	-0.439121	15.5707	7.94761e-05	0.00587176	-
ENST00000523965	ENSG00000120896	8	22565678	22575495	+	SORBS3-032	protein_coding	ENSG00000120896	SORBS3	protein_coding	10174	E	ENST00000523965	2.84474	3.41718	15.5513	8.02975e-05	0.00591985	-
ENST00000514825	ENSG00000170606	5	133101596	133104477	+	HSPA4-003	retained_intron	ENSG00000170606	HSPA4	protein_coding	NA	E	ENST00000514825	2.76992	1.16838	15.5292	8.12417e-05	0.00597677	-
ENST00000503731	ENSG00000104723	8	15540283	15764459	+	TUSC3-007	protein_coding	ENSG00000104723	TUSC3	protein_coding	7991	E	ENST00000503731	-6.20606	0.538252	15.4998	8.25124e-05	0.00605742	-
ENST00000275635	ENSG00000086730	7	74210006	74229831	+	LAT2-009	protein_coding	ENSG00000086730	LAT2	protein_coding	7462	E	ENST00000275635	-6.70743	-1.32914	15.4791	8.34216e-05	0.00611125	-
MSTRG.32645.10	NA	6	292477	351353	+	not_in_ref	not_in_ref	not_in_ref	not_in_ref	not_in_ref	no_EG	j	ENST00000344450	4.34665	2.26727	15.4658	8.40098e-05	0.00614138	-
ENST00000327697	ENSG00000164068	3	49689499	49721527	+	RNF123-001	protein_coding	ENSG00000164068	RNF123	protein_coding	63891	E	ENST00000327697	-6.02401	3.02175	15.4582	8.4352e-05	0.00615344	-
MSTRG.1777.5	NA	1	94927554	94963243	+	not_in_ref	not_in_ref	not_in_ref	not_in_ref	not_in_ref	no_EG	j	ENST00000438509	-7.96489	0.521553	15.4512	8.46624e-05	0.00615399	-
ENST00000379730	ENSG00000145703	5	76547409	76708130	+	IQGAP2-201	protein_coding	ENSG00000145703	IQGAP2	protein_coding	10788	E	ENST00000379730	-4.70829	0.0451195	15.4476	8.48263e-05	0.00615399	-
ENST00000300849	ENSG00000167394	16	31060850	31074320	-	ZNF668-001	protein_coding	ENSG00000167394	ZNF668	protein_coding	79759	E	ENST00000300849	-7.26669	1.24802	15.4461	8.48911e-05	0.00615399	-
ENST00000458595	ENSG00000120549	10	24208791	24547848	+	KIAA1217-203	protein_coding	ENSG00000120549	KIAA1217	protein_coding	56243	E	ENST00000458595	-6.61635	-0.145392	15.438	8.52555e-05	0.00616752	-
MSTRG.6446.7	NA	11	47716519	47744143	-	not_in_ref	not_in_ref	not_in_ref	not_in_ref	not_in_ref	no_EG	j	ENST00000263773	5.24467	0.645471	15.4309	8.55784e-05	0.00617802	-
ENST00000427177	ENSG00000184640	17	77281410	77500592	+	SEPT9-001	protein_coding	ENSG00000184640	SEPT9	protein_coding	10801	E	ENST00000427177	-9.34963	2.51117	15.4247	8.58588e-05	0.0061854	-
ENST00000305046	ENSG00000196616	4	99304964	99321399	-	ADH1B-001	protein_coding	ENSG00000196616	ADH1B	protein_coding	125	E	ENST00000305046	-9.11195	6.03632	15.4107	8.64974e-05	0.0062185	-
MSTRG.36685.27	NA	7	150368908	150374039	+	not_in_ref	not_in_ref	not_in_ref	not_in_ref	not_in_ref	no_EG	j	ENST00000397281	2.88903	2.0553	15.3803	8.79003e-05	0.0063063	-
MSTRG.22489.22	NA	2	113237595	113240825	+	not_in_ref	not_in_ref	not_in_ref	not_in_ref	not_in_ref	no_EG	j	ENST00000456685	4.26405	0.769665	15.3613	8.87868e-05	0.00634663	-
ENST00000379802	ENSG00000096696	6	7541575	7586717	+	DSP-001	protein_coding	ENSG00000096696	DSP	protein_coding	1832	E	ENST00000379802	-5.09229	2.34138	15.3571	8.89865e-05	0.00634663	-
MSTRG.41531.7	NA	X	150766346	150828368	-	not_in_ref	not_in_ref	not_in_ref	not_in_ref	not_in_ref	no_EG	j	ENST00000613030	4.82037	4.71353	15.3565	8.90147e-05	0.00634663	-
MSTRG.15345.30	NA	16	69187642	69325046	+	not_in_ref	not_in_ref	not_in_ref	not_in_ref	not_in_ref	no_EG	j	ENST00000254950	-10.4275	1.58784	15.3527	8.91935e-05	0.00634663	-
MSTRG.557.1	NA	1	23359435	23370432	-	not_in_ref	not_in_ref	not_in_ref	not_in_ref	not_in_ref	no_EG	j	ENST00000314011	-9.31093	2.16686	15.3408	8.97576e-05	0.00637371	-
MSTRG.17067.10	NA	17	43848558	43863633	+	not_in_ref	not_in_ref	not_in_ref	not_in_ref	not_in_ref	no_EG	j	ENST00000317310	-7.25664	1.74976	15.3259	9.04683e-05	0.00641106	-
ENST00000565848	ENSG00000123358	12	52056689	52057471	+	NR4A1-018	retained_intron	ENSG00000123358	NR4A1	protein_coding	3164	noCuffcomp	noCuffcomp	5.08285	-1.16404	15.2867	9.23659e-05	0.00653221	-
ENST00000439918	ENSG00000185624	17	81843994	81860560	-	P4HB-021	protein_coding	ENSG00000185624	P4HB	protein_coding	5034	E	ENST00000439918	-8.92962	-1.19497	15.2701	9.318e-05	0.00657639	-
ENST00000496254	ENSG00000163938	3	52686049	52694459	+	GNL3-004	retained_intron	ENSG00000163938	GNL3	protein_coding	26354	E	ENST00000496254	0.618446	2.15012	15.2636	9.3503e-05	0.0065858	-
MSTRG.17406.6	NA	17	57085717	57121345	+	not_in_ref	not_in_ref	not_in_ref	not_in_ref	not_in_ref	no_EG	j	ENST00000621116	-8.67948	0.243549	15.2505	9.41504e-05	0.00661797	-
ENST00000340020	ENSG00000186063	1	222668013	222712524	-	AIDA-001	protein_coding	ENSG00000186063	AIDA	protein_coding	64853	E	ENST00000340020	-16.0652	1.33734	15.2441	9.44726e-05	0.00662721	-
MSTRG.16033.5	NA	17	7562122	7571686	+	not_in_ref	not_in_ref	not_in_ref	not_in_ref	not_in_ref	no_EG	j	ENST00000614237	-8.15644	2.70452	15.2357	9.48933e-05	0.0066433	-
ENST00000583848	ENSG00000072778	17	7224489	7225266	+	ACADVL-033	nonsense_mediated_decay	ENSG00000072778	ACADVL	protein_coding	37	E	ENST00000583848	-4.47245	-0.762052	15.2153	9.59249e-05	0.006702	-
MSTRG.5743.4	NA	11	767222	774068	-	not_in_ref	not_in_ref	not_in_ref	not_in_ref	not_in_ref	no_EG	j	ENST00000319863	-6.17744	0.771504	15.1585	9.88516e-05	0.00689262	-
ENST00000352222	ENSG00000115317	2	74529990	74533332	+	HTRA2-002	protein_coding	ENSG00000115317	HTRA2	protein_coding	27429	E	ENST00000352222	6.50189	1.30746	15.1469	9.94589e-05	0.00692106	-
ENST00000568865	ENSG00000064666	19	1031137	1038309	+	CNN2-009	protein_coding	ENSG00000064666	CNN2	protein_coding	1265	E	ENST00000568865	-5.58754	0.841551	15.1368	9.99947e-05	0.00694443	-
ENST00000565316	ENSG00000188603	16	28477516	28491759	-	CLN3-020	protein_coding	ENSG00000188603	CLN3	protein_coding	1201	E	ENST00000565316	-6.19965	0.794717	15.1254	0.000100599	0.00697246	-
ENST00000467229	ENSG00000137210	6	10751170	10829205	+	TMEM14B-016	nonsense_mediated_decay	ENSG00000137210	TMEM14B	protein_coding	81853	noCuffcomp	noCuffcomp	-5.8467	0.641082	15.1187	0.000100957	0.00698335	-
ENST00000535698	ENSG00000060237	12	862235	880814	+	WNK1-015	protein_coding	ENSG00000060237	WNK1	protein_coding	65125	noCuffcomp	noCuffcomp	-5.26863	-0.506532	15.0991	0.000102009	0.0070421	-
MSTRG.28949.11	NA	4	6866190	6884104	+	not_in_ref	not_in_ref	not_in_ref	not_in_ref	not_in_ref	no_EG	j	ENST00000307659	-6.57567	2.35108	15.0886	0.000102581	0.00706751	-
ENST00000369047	ENSG00000143369	1	150508085	150513789	+	ECM1-011	protein_coding	ENSG00000143369	ECM1	protein_coding	1893	E	ENST00000369047	-9.73016	0.137789	15.0821	0.000102936	0.0070779	-
MSTRG.9942.9	NA	12	123459750	123466389	+	not_in_ref	not_in_ref	not_in_ref	not_in_ref	not_in_ref	no_EG	j	ENST00000526639	4.96238	-1.04854	15.0598	0.000104156	0.00714768	-
ENST00000475061	ENSG00000083750	X	55755810	55758382	+	RRAGB-006	processed_transcript	ENSG00000083750	RRAGB	protein_coding	10325	E	ENST00000475061	-6.88864	-1.09348	15.041	0.000105199	0.007205	-
ENST00000578758	ENSG00000108654	17	64500134	64502350	-	DDX5-030	retained_intron	ENSG00000108654	DDX5	protein_coding	1655	E	ENST00000578758	-5.15345	1.64684	14.9936	0.000107879	0.00737397	-
MSTRG.10997.1	NA	14	20365667	20381664	-	not_in_ref	not_in_ref	not_in_ref	not_in_ref	not_in_ref	no_EG	j	ENST00000262715	-5.54034	0.268575	14.9849	0.000108375	0.00739338	-
ENST00000471232	ENSG00000115760	2	32524758	32618876	+	BIRC6-002	retained_intron	ENSG00000115760	BIRC6	protein_coding	57448	E	ENST00000471232	-10.3907	1.87923	14.9701	0.00010923	0.00743705	-
ENST00000344987	ENSG00000154889	18	11884068	11908330	-	MPPE1-016	protein_coding	ENSG00000154889	MPPE1	protein_coding	65258	E	ENST00000344987	-7.95218	1.03519	14.95	0.0001104	0.00750203	-
MSTRG.37333.19	NA	8	38757299	38853023	+	not_in_ref	not_in_ref	not_in_ref	not_in_ref	not_in_ref	no_EG	j	ENST00000518415	5.0884	5.35164	14.9197	0.000112185	0.00759592	-
MSTRG.28919.28	NA	4	3422930	3432238	+	not_in_ref	not_in_ref	not_in_ref	not_in_ref	not_in_ref	no_EG	j	ENST00000344733	-5.26046	-0.374352	14.9191	0.000112219	0.00759592	-
ENST00000555405	ENSG00000119638	14	75082121	75091685	-	NEK9-004	retained_intron	ENSG00000119638	NEK9	protein_coding	NA	E	ENST00000555405	3.91955	3.46997	14.899	0.000113426	0.00766265	-
MSTRG.39973.1	NA	9	133019486	133021148	+	not_in_ref	not_in_ref	not_in_ref	not_in_ref	not_in_ref	no_EG	o	ENST00000436459	-14.0623	8.37142	14.8911	0.000113896	0.00767948	-
ENST00000261789	ENSG00000100926	14	24189143	24195687	-	TM9SF1-002	protein_coding	ENSG00000100926	TM9SF1	protein_coding	10548	noCuffcomp	noCuffcomp	-6.72068	0.878896	14.8845	0.0001143	0.00768126	-
MSTRG.13436.4	NA	15	67201707	67254453	-	not_in_ref	not_in_ref	not_in_ref	not_in_ref	not_in_ref	no_EG	j	ENST00000261880	-10.0914	0.740601	14.8834	0.000114365	0.00768126	-
ENST00000612242	ENSG00000081019	1	113761833	113812448	-	RSBN1-201	protein_coding	ENSG00000081019	RSBN1	protein_coding	54665	noCuffcomp	noCuffcomp	5.14666	1.92547	14.8662	0.000115416	0.00773685	-
ENST00000598962	ENSG00000105223	19	40348672	40366666	+	PLD3-022	protein_coding	ENSG00000105223	PLD3	protein_coding	23646	E	ENST00000598962	-13.1488	-1.19494	14.8455	0.000116684	0.0078068	-
ENST00000409644	ENSG00000167716	17	1724960	1738592	+	WDR81-001	protein_coding	ENSG00000167716	WDR81	protein_coding	124997	E	ENST00000409644	-12.9072	3.56668	14.8344	0.000117373	0.00783782	-
ENST00000484266	ENSG00000100288	22	50578963	50582824	-	CHKB-005	retained_intron	ENSG00000100288	CHKB	protein_coding	1120	E	ENST00000484266	-5.83316	-0.319915	14.8219	0.000118153	0.00787477	-
ENST00000538028	ENSG00000103591	15	67201673	67221202	-	AAGAB-004	processed_transcript	ENSG00000103591	AAGAB	protein_coding	79719	E	ENST00000538028	-5.57332	0.206367	14.799	0.000119596	0.00794423	-
MSTRG.32296.16	NA	5	158695922	158701927	-	not_in_ref	not_in_ref	not_in_ref	not_in_ref	not_in_ref	no_EG	j	ENST00000518836	-6.87199	5.24906	14.7981	0.000119653	0.00794423	-
MSTRG.32645.1	NA	6	291630	351350	+	not_in_ref	not_in_ref	not_in_ref	not_in_ref	not_in_ref	no_EG	j	ENST00000344450	4.31164	4.03765	14.7757	0.000121083	0.00800899	-
ENST00000493287	ENSG00000242485	1	1401913	1406307	-	MRPL20-006	processed_transcript	ENSG00000242485	MRPL20	protein_coding	55052	E	ENST00000493287	4.57355	2.1655	14.7756	0.00012109	0.00800899	-
ENST00000452621	ENSG00000117625	1	211259388	211313298	+	RCOR3-007	protein_coding	ENSG00000117625	RCOR3	protein_coding	55758	E	ENST00000452621	-5.95427	0.465804	14.7398	0.000123412	0.00814705	-
ENST00000571105	ENSG00000185813	17	81904367	81911413	-	PCYT2-002	protein_coding	ENSG00000185813	PCYT2	protein_coding	NA	E	ENST00000571105	4.09063	2.96041	14.726	0.000124322	0.00818409	-
MSTRG.33283.2	NA	6	33076010	33083809	+	not_in_ref	not_in_ref	not_in_ref	not_in_ref	not_in_ref	no_EG	j	ENST00000418931	-5.81112	-2.32776	14.7241	0.000124444	0.00818409	-
MSTRG.20976.3	NA	2	279574	288665	-	not_in_ref	not_in_ref	not_in_ref	not_in_ref	not_in_ref	no_EG	j	ENST00000403610	-6.24101	0.269929	14.6925	0.000126552	0.00829844	-
ENST00000303068	ENSG00000135063	9	69371266	69392455	+	FAM189A2-001	protein_coding	ENSG00000135063	FAM189A2	protein_coding	9413	E	ENST00000303068	-8.67992	-0.588223	14.6908	0.000126661	0.00829844	-
ENST00000565092	ENSG00000103249	16	1445344	1449797	-	CLCN7-005	retained_intron	ENSG00000103249	CLCN7	protein_coding	1186	E	ENST00000565092	-6.37597	1.13747	14.6831	0.000127183	0.00831695	-
ENST00000589664	ENSG00000183077	17	78202572	78207405	+	AFMID-012	processed_transcript	ENSG00000183077	AFMID	protein_coding	125061	E	ENST00000589664	-3.76631	-1.36689	14.6354	0.000130444	0.00851417	-
MSTRG.21538.6	NA	2	44317938	44359749	-	not_in_ref	not_in_ref	not_in_ref	not_in_ref	not_in_ref	no_EG	j	ENST00000426481	-8.08108	0.0751598	14.6118	0.000132082	0.0086049	-
ENST00000296522	ENSG00000164120	4	174490177	174522898	-	HPGD-001	protein_coding	ENSG00000164120	HPGD	protein_coding	3248	E	ENST00000296522	-8.1733	-1.61813	14.5962	0.000133184	0.00866044	-
ENST00000375561	ENSG00000106809	9	92383967	92404613	-	OGN-001	protein_coding	ENSG00000106809	OGN	protein_coding	4969	E	ENST00000375561	-4.07012	6.54728	14.5893	0.000133672	0.00867593	-
MSTRG.40036.2	NA	9	136428619	136434779	-	not_in_ref	not_in_ref	not_in_ref	not_in_ref	not_in_ref	no_EG	j	ENST00000371712	2.6881	1.67523	14.5827	0.000134137	0.0086899	-
MSTRG.15603.6	NA	16	84974467	84989118	-	not_in_ref	not_in_ref	not_in_ref	not_in_ref	not_in_ref	no_EG	j	ENST00000344861	-0.0403312	0.587214	14.5264	0.000138208	0.00893693	-
ENST00000590994	ENSG00000249115	19	35620058	35623608	+	HAUS5-010	protein_coding	ENSG00000249115	HAUS5	protein_coding	23354	E	ENST00000590994	-8.79186	-1.20047	14.5176	0.00013886	0.00896238	-
ENST00000622629	ENSG00000116062	2	47783082	47806952	+	MSH6-205	protein_coding	ENSG00000116062	MSH6	protein_coding	2956	E	ENST00000622629	-6.10484	1.95382	14.4876	0.000141084	0.00908904	-
MSTRG.35955.12	NA	7	99027444	99032797	-	not_in_ref	not_in_ref	not_in_ref	not_in_ref	not_in_ref	no_EG	j	ENST00000361125	3.78922	1.27652	14.4661	0.000142708	0.00917665	-
ENST00000521688	ENSG00000120533	8	109334324	109345952	+	ENY2-001	protein_coding	ENSG00000120533	ENY2	protein_coding	56943	E	ENST00000521688	4.99129	1.27904	14.4609	0.000143098	0.00918471	-
ENST00000566157	ENSG00000087263	16	56451490	56479100	+	OGFOD1-001	protein_coding	ENSG00000087263	OGFOD1	protein_coding	NA	E	ENST00000566157	4.58176	0.654839	14.41	0.000147023	0.00940656	-
ENST00000467111	ENSG00000168961	17	27631214	27649541	+	LGALS9-003	nonsense_mediated_decay	ENSG00000168961	LGALS9	protein_coding	3965	E	ENST00000467111	-6.88543	0.431331	14.409	0.000147096	0.00940656	-
MSTRG.600.28	NA	1	24646024	24673309	+	not_in_ref	not_in_ref	not_in_ref	not_in_ref	not_in_ref	no_EG	j	ENST00000374389	-5.28506	1.95139	14.3974	0.000148004	0.00944642	-
ENST00000368086	ENSG00000162729	1	160091340	160098689	-	IGSF8-003	protein_coding	ENSG00000162729	IGSF8	protein_coding	93185	E	ENST00000368086	-7.06972	0.490019	14.3941	0.000148263	0.00944642	-
ENST00000482446	ENSG00000189050	17	59952362	59964734	-	RNFT1-002	nonsense_mediated_decay	ENSG00000189050	RNFT1	protein_coding	51136	E	ENST00000482446	-6.7452	0.390615	14.3872	0.000148814	0.00945549	-
MSTRG.24062.12	NA	20	3209525	3223860	+	not_in_ref	not_in_ref	not_in_ref	not_in_ref	not_in_ref	no_EG	j	ENST00000380113	5.19616	0.844234	14.3838	0.00014908	0.00945549	-
ENST00000560468	ENSG00000182718	15	60360967	60397986	-	ANXA2-020	protein_coding	ENSG00000182718	ANXA2	protein_coding	302	noCuffcomp	noCuffcomp	-9.21654	1.90317	14.382	0.000149223	0.00945549	-
ENST00000484697	ENSG00000117480	1	46405723	46413848	+	FAAH-002	nonsense_mediated_decay	ENSG00000117480	FAAH	protein_coding	2166	E	ENST00000484697	-8.3252	-1.29853	14.3752	0.000149761	0.00945602	-
MSTRG.34699.40	NA	6	167968803	167972023	+	not_in_ref	not_in_ref	not_in_ref	not_in_ref	not_in_ref	no_EG	j	ENST00000400822	3.66543	1.28944	14.375	0.000149776	0.00945602	-
ENST00000336126	ENSG00000180628	10	91220788	91284331	+	PCGF5-001	protein_coding	ENSG00000180628	PCGF5	protein_coding	84333	E	ENST00000336126	-14.6417	4.0003	14.3604	0.000150941	0.0095123	-
ENST00000460472	ENSG00000155657	2	178525989	178807423	-	TTN-003	protein_coding	ENSG00000155657	TTN	protein_coding	7273	E	ENST00000460472	-7.53178	-0.242176	14.3457	0.000152123	0.00956945	-
ENST00000327374	ENSG00000183597	22	20021108	20065926	+	TANGO2-003	protein_coding	ENSG00000183597	TANGO2	protein_coding	128989	E	ENST00000327374	-9.74536	2.3052	14.3284	0.000153531	0.0096405	-
MSTRG.29367.2	NA	4	55427972	55510066	-	not_in_ref	not_in_ref	not_in_ref	not_in_ref	not_in_ref	no_EG	j	ENST00000381322	9.36465	2.60284	14.324	0.000153891	0.00964063	-
ENST00000370345	ENSG00000075826	10	100486642	100519834	-	SEC31B-003	protein_coding	ENSG00000075826	SEC31B	protein_coding	25956	E	ENST00000370345	-7.86772	0.100057	14.3216	0.000154088	0.00964063	-
MSTRG.37983.6	NA	8	102826364	102864035	-	not_in_ref	not_in_ref	not_in_ref	not_in_ref	not_in_ref	no_EG	j	ENST00000347770	4.8224	2.42809	14.3086	0.000155151	0.00968968	-
ENST00000308595	ENSG00000173020	11	67266410	67286556	+	ADRBK1-001	protein_coding	ENSG00000173020	ADRBK1	protein_coding	156	E	ENST00000308595	-9.76265	1.64871	14.2943	0.000156338	0.00974598	-
MSTRG.16945.2	NA	17	42101404	42112609	-	not_in_ref	not_in_ref	not_in_ref	not_in_ref	not_in_ref	no_EG	j	ENST00000251642	-9.13848	1.25764	14.291	0.000156614	0.00974598	-
ENST00000409036	ENSG00000091428	2	172735967	173052893	+	RAPGEF4-011	protein_coding	ENSG00000091428	RAPGEF4	protein_coding	11069	E	ENST00000409036	-8.03266	1.02707	14.2835	0.000157236	0.00976719	-
MSTRG.28128.1	NA	3	148984175	148984995	-	not_in_ref	not_in_ref	not_in_ref	not_in_ref	not_in_ref	no_EG	p	ENST00000461599	4.86911	0.64986	14.2774	0.000157747	0.00978144	-
ENST00000585281	ENSG00000265190	10	47467993	47484055	-	ANXA8-001	protein_coding	ENSG00000265190	ANXA8	protein_coding	653145	E	ENST00000585281	-4.94801	3.6115	14.2724	0.000158165	0.00978986	-
ENST00000427012	ENSG00000183337	X	40051257	40063002	-	BCOR-002	protein_coding	ENSG00000183337	BCOR	protein_coding	54880	E	ENST00000427012	-6.22523	-1.10916	14.1722	0.00016682	0.0103072	-
MSTRG.19061.11	NA	19	4445091	4455416	-	not_in_ref	not_in_ref	not_in_ref	not_in_ref	not_in_ref	no_EG	j	ENST00000301281	-0.56305	3.55895	14.1682	0.000167177	0.0103109	-
MSTRG.39651.4	NA	9	114402124	114505450	-	not_in_ref	not_in_ref	not_in_ref	not_in_ref	not_in_ref	no_EG	j	ENST00000362057	-5.42475	-0.798551	14.1607	0.00016784	0.0103335	-
ENST00000354546	ENSG00000197043	5	151101105	151157882	-	ANXA6-001	protein_coding	ENSG00000197043	ANXA6	protein_coding	309	E	ENST00000354546	-10.2645	1.86207	14.1523	0.000168595	0.0103616	-
MSTRG.3911.4	NA	1	241593602	241628494	-	not_in_ref	not_in_ref	not_in_ref	not_in_ref	not_in_ref	no_EG	j	ENST00000478849	-9.67138	0.545242	14.1222	0.000171308	0.0105097	-
MSTRG.3749.2	NA	1	228106679	228109175	-	not_in_ref	not_in_ref	not_in_ref	not_in_ref	not_in_ref	no_EG	j	ENST00000366731	-6.03101	-1.11354	14.0952	0.000173785	0.0106429	-
MSTRG.37213.8	NA	8	30063130	30082948	-	not_in_ref	not_in_ref	not_in_ref	not_in_ref	not_in_ref	no_EG	j	ENST00000256255	-10.5417	4.88924	14.079	0.000175294	0.0107164	-
MSTRG.10324.7	NA	13	36301667	36346283	-	not_in_ref	not_in_ref	not_in_ref	not_in_ref	not_in_ref	no_EG	j	ENST00000494062	5.08932	2.79021	14.018	0.000181071	0.0110501	-
MSTRG.7732.1	NA	11	121360376	121361304	-	not_in_ref	not_in_ref	not_in_ref	not_in_ref	not_in_ref	no_EG	p	ENST00000527904	-4.61486	0.798887	13.9863	0.000184152	0.0112184	-
MSTRG.15668.1	NA	16	88087095	88090806	+	not_in_ref	not_in_ref	not_in_ref	not_in_ref	not_in_ref	no_EG	j	ENST00000566155	-2.38784	0.930489	13.9764	0.000185125	0.0112437	-
MSTRG.18062.8	NA	17	82079360	82091704	-	not_in_ref	not_in_ref	not_in_ref	not_in_ref	not_in_ref	no_EG	j	ENST00000306749	-6.63838	7.60616	13.9707	0.000185683	0.0112437	-
MSTRG.14711.1	NA	16	27459555	27482512	-	not_in_ref	not_in_ref	not_in_ref	not_in_ref	not_in_ref	no_EG	j	ENST00000356183	4.60776	2.46887	13.9682	0.000185931	0.0112437	-
ENST00000451209	ENSG00000233971	2	71984182	71984434	-	RPS20P10-001	processed_pseudogene	ENSG00000233971	RPS20P10	processed_pseudogene	NA	E	ENST00000451209	3.90936	0.694246	13.9675	0.000185994	0.0112437	-
ENST00000595565	ENSG00000104980	19	7926721	7932746	-	TIMM44-009	protein_coding	ENSG00000104980	TIMM44	protein_coding	10469	E	ENST00000595565	6.56719	0.955329	13.9656	0.000186187	0.0112437	-
MSTRG.13566.2	NA	15	74836118	74843019	-	not_in_ref	not_in_ref	not_in_ref	not_in_ref	not_in_ref	no_EG	j	ENST00000440863	-5.2169	1.1051	13.9498	0.000187757	0.0113189	-
ENST00000216274	ENSG00000129465	14	24336021	24340045	-	RIPK3-001	protein_coding	ENSG00000129465	RIPK3	protein_coding	11035	E	ENST00000216274	-4.94504	0.199719	13.9357	0.000189176	0.0113847	-
ENST00000539496	ENSG00000003096	X	117897814	117985280	-	KLHL13-202	protein_coding	ENSG00000003096	KLHL13	protein_coding	90293	E	ENST00000539496	-8.78466	-1.39018	13.9318	0.000189569	0.0113885	-
ENST00000613372	ENSG00000277631	9	72727	87739	+	PGM5P3-AS1-006	lincRNA	ENSG00000277631	PGM5P3-AS1	lincRNA	NA	E	ENST00000613372	-7.13372	0.855326	13.9173	0.000191035	0.0114568	-
ENST00000387314	ENSG00000210049	MT	577	647	+	MT-TF-201	Mt_tRNA	ENSG00000210049	MT-TF	Mt_tRNA	NA	E	ENST00000387314	4.06948	-0.968759	13.9098	0.000191801	0.0114665	-
ENST00000532202	ENSG00000177156	11	764370	765005	+	TALDO1-008	processed_transcript	ENSG00000177156	TALDO1	protein_coding	6888	E	ENST00000532202	4.37869	2.06046	13.9092	0.000191856	0.0114665	-
MSTRG.37786.4	NA	8	85107238	85146076	+	not_in_ref	not_in_ref	not_in_ref	not_in_ref	not_in_ref	no_EG	j	ENST00000360375	-5.12578	0.736056	13.8432	0.000198712	0.0118558	-
MSTRG.34420.4	NA	6	148508074	148552067	+	not_in_ref	not_in_ref	not_in_ref	not_in_ref	not_in_ref	no_EG	j	ENST00000367467	-6.87186	4.12964	13.8372	0.000199351	0.0118735	-
ENST00000353788	ENSG00000104497	8	81799581	81842193	-	SNX16-002	protein_coding	ENSG00000104497	SNX16	protein_coding	64089	E	ENST00000353788	5.19451	3.09895	13.8236	0.000200795	0.0119391	-
MSTRG.15386.13	NA	16	70691329	70801075	-	not_in_ref	not_in_ref	not_in_ref	not_in_ref	not_in_ref	no_EG	j	ENST00000261776	-6.37614	1.46883	13.8136	0.000201869	0.0119824	-
ENST00000610318	ENSG00000182168	4	95162504	95335632	-	UNC5C-201	protein_coding	ENSG00000182168	UNC5C	protein_coding	8633	E	ENST00000610318	0.215599	2.46533	13.7968	0.000203687	0.0120697	-
ENST00000321955	ENSG00000077616	11	90134712	90192611	+	NAALAD2-002	protein_coding	ENSG00000077616	NAALAD2	protein_coding	10003	E	ENST00000321955	-5.73266	1.2012	13.7787	0.000205652	0.0121471	-
MSTRG.20970.9	NA	19	58575460	58599435	+	not_in_ref	not_in_ref	not_in_ref	not_in_ref	not_in_ref	no_EG	j	ENST00000487264	4.76485	1.08024	13.7783	0.000205694	0.0121471	-
MSTRG.33220.10	NA	6	32027320	32035401	+	not_in_ref	not_in_ref	not_in_ref	not_in_ref	not_in_ref	no_EG	j	ENST00000435363	-8.2207	3.45562	13.7525	0.000208546	0.0122946	-
ENST00000325144	ENSG00000181472	6	151364117	151391548	-	ZBTB2-001	protein_coding	ENSG00000181472	ZBTB2	protein_coding	57621	E	ENST00000325144	-2.70402	0.147843	13.7477	0.000209082	0.0123053	-
MSTRG.35691.8	NA	7	77004662	77042402	+	not_in_ref	not_in_ref	not_in_ref	not_in_ref	not_in_ref	no_EG	j	ENST00000584900	-11.2392	-2.35775	13.7116	0.000213135	0.0125227	-
MSTRG.26635.5	NA	3	31532972	31637593	+	not_in_ref	not_in_ref	not_in_ref	not_in_ref	not_in_ref	no_EG	j	ENST00000295770	-10.9063	0.712168	13.7078	0.000213569	0.0125228	-
ENST00000292303	ENSG00000160791	3	46370854	46376206	+	CCR5-001	protein_coding	ENSG00000160791	CCR5	protein_coding	NA	E	ENST00000292303	-5.49632	-0.514527	13.7052	0.000213859	0.0125228	-
ENST00000426055	ENSG00000003436	2	187466985	187554492	-	TFPI-002	protein_coding	ENSG00000003436	TFPI	protein_coding	7035	noCuffcomp	noCuffcomp	0.802039	4.13176	13.6913	0.00021545	0.0125947	-
MSTRG.1377.4	NA	1	62237544	62283056	-	not_in_ref	not_in_ref	not_in_ref	not_in_ref	not_in_ref	no_EG	j	ENST00000371153	-8.15152	2.04293	13.6842	0.000216262	0.012621	-
ENST00000610563	ENSG00000188811	13	39038391	39050103	+	NHLRC3-201	protein_coding	ENSG00000188811	NHLRC3	protein_coding	387921	noCuffcomp	noCuffcomp	-7.15047	3.61799	13.6669	0.000218263	0.0127164	-
MSTRG.14420.1	NA	16	11750586	11796445	-	not_in_ref	not_in_ref	not_in_ref	not_in_ref	not_in_ref	no_EG	j	ENST00000355758	-6.7064	1.9324	13.6606	0.000218999	0.0127379	-
MSTRG.14209.4	NA	16	2483010	2505733	+	not_in_ref	not_in_ref	not_in_ref	not_in_ref	not_in_ref	no_EG	j	ENST00000293970	4.65531	1.22063	13.6538	0.000219794	0.0127628	-
MSTRG.32117.22	NA	5	148414112	148442752	+	not_in_ref	not_in_ref	not_in_ref	not_in_ref	not_in_ref	no_EG	j	ENST00000340253	4.6879	1.72461	13.6433	0.000221033	0.0128102	-
MSTRG.27160.9	NA	3	56557203	56621755	+	not_in_ref	not_in_ref	not_in_ref	not_in_ref	not_in_ref	no_EG	j	ENST00000471681	-7.39834	-1.11589	13.6406	0.000221349	0.0128102	-
MSTRG.2678.1	NA	1	156290089	156295610	-	not_in_ref	not_in_ref	not_in_ref	not_in_ref	not_in_ref	no_EG	j	ENST00000614643	-1.54041	-0.634944	13.6372	0.000221748	0.0128119	-
MSTRG.2694.4	NA	1	156728557	156736949	+	not_in_ref	not_in_ref	not_in_ref	not_in_ref	not_in_ref	no_EG	j	ENST00000368216	3.91098	1.32007	13.625	0.000223191	0.0128677	-
MSTRG.33552.10	NA	6	43620569	43622804	-	not_in_ref	not_in_ref	not_in_ref	not_in_ref	not_in_ref	no_EG	j	ENST00000307126	3.75554	1.61095	13.6228	0.000223454	0.0128677	-
MSTRG.26007.3	NA	22	38705742	38732239	+	not_in_ref	not_in_ref	not_in_ref	not_in_ref	not_in_ref	no_EG	j	ENST00000216044	-8.39548	1.7138	13.608	0.000225229	0.0129484	-
ENST00000475430	ENSG00000186310	X	93670935	93673568	-	NAP1L3-002	protein_coding	ENSG00000186310	NAP1L3	protein_coding	4675	E	ENST00000475430	-4.92358	-0.949756	13.6036	0.000225751	0.012957	-
MSTRG.22491.7	NA	2	113598384	113599041	+	not_in_ref	not_in_ref	not_in_ref	not_in_ref	not_in_ref	no_EG	j	ENST00000453662	-7.54105	-0.606627	13.5926	0.000227077	0.0129914	-
ENST00000557609	ENSG00000100600	14	92703847	92748603	-	LGMN-007	nonsense_mediated_decay	ENSG00000100600	LGMN	protein_coding	5641	E	ENST00000557609	-8.86665	4.21135	13.5924	0.000227099	0.0129914	-
ENST00000433983	ENSG00000140374	15	76216084	76311404	-	ETFA-002	protein_coding	ENSG00000140374	ETFA	protein_coding	2108	E	ENST00000433983	-6.09633	2.94478	13.5469	0.000232674	0.0132885	-
MSTRG.30043.19	NA	4	128811326	128873264	+	not_in_ref	not_in_ref	not_in_ref	not_in_ref	not_in_ref	no_EG	j	ENST00000226319	4.2435	1.35958	13.5349	0.000234164	0.0133418	-
ENST00000513253	ENSG00000159685	3	126730564	126960391	+	CHCHD6-008	protein_coding	ENSG00000159685	CHCHD6	protein_coding	84303	E	ENST00000513253	4.81615	-0.293689	13.5332	0.000234377	0.0133418	-
MSTRG.12996.4	NA	15	43785462	43796089	+	not_in_ref	not_in_ref	not_in_ref	not_in_ref	not_in_ref	no_EG	j	ENST00000448830	-9.32547	0.0434354	13.5116	0.0002371	0.0134595	-
MSTRG.17841.21	NA	17	75667410	75706701	+	not_in_ref	not_in_ref	not_in_ref	not_in_ref	not_in_ref	no_EG	j	ENST00000583536	-6.58312	1.13774	13.5106	0.00023722	0.0134595	-
ENST00000470395	ENSG00000116209	1	54032019	54036802	-	TMEM59-009	processed_transcript	ENSG00000116209	TMEM59	protein_coding	9528	E	ENST00000470395	4.83824	3.61962	13.4958	0.000239097	0.0135439	-
MSTRG.7734.8	NA	11	121293071	121308633	+	not_in_ref	not_in_ref	not_in_ref	not_in_ref	not_in_ref	no_EG	j	ENST00000534230	-6.50051	3.03453	13.4409	0.000246192	0.0139119	-
MSTRG.890.10	NA	1	36225429	36305350	+	not_in_ref	not_in_ref	not_in_ref	not_in_ref	not_in_ref	no_EG	j	ENST00000469141	-5.16051	4.51487	13.4394	0.000246394	0.0139119	-
MSTRG.22962.17	NA	2	164684825	164841850	-	not_in_ref	not_in_ref	not_in_ref	not_in_ref	not_in_ref	no_EG	j	ENST00000629362	-4.70025	1.68534	13.4204	0.000248897	0.0140304	-
ENST00000393910	ENSG00000141698	17	41825238	41836197	-	NT5C3B-015	retained_intron	ENSG00000141698	NT5C3B	protein_coding	NA	E	ENST00000393910	-6.07168	1.01602	13.4116	0.00025008	0.0140698	-
ENST00000370558	ENSG00000097033	1	86704576	86748184	+	SH3GLB1-001	protein_coding	ENSG00000097033	SH3GLB1	protein_coding	51100	E	ENST00000370558	-8.27918	4.95866	13.4091	0.000250407	0.0140698	-
ENST00000304552	ENSG00000172215	3	45943472	45948353	+	CXCR6-001	protein_coding	ENSG00000172215	CXCR6	protein_coding	10663	E	ENST00000304552	-5.30594	-1.24829	13.3986	0.000251806	0.0141255	-
MSTRG.17614.7	NA	17	63702842	63707404	-	not_in_ref	not_in_ref	not_in_ref	not_in_ref	not_in_ref	no_EG	j	ENST00000336174	-6.6519	1.12314	13.3757	0.000254902	0.0142762	-
ENST00000247291	ENSG00000126878	9	131096542	131123145	+	AIF1L-001	protein_coding	ENSG00000126878	AIF1L	protein_coding	83543	E	ENST00000247291	-7.4344	2.73533	13.3692	0.000255795	0.0143031	-
MSTRG.34528.16	NA	6	152991228	152998031	-	not_in_ref	not_in_ref	not_in_ref	not_in_ref	not_in_ref	no_EG	j	ENST00000367233	-0.632443	0.744008	13.3613	0.000256875	0.0143404	-
MSTRG.33157.24	NA	6	31353872	31357109	-	not_in_ref	not_in_ref	not_in_ref	not_in_ref	not_in_ref	no_EG	j	ENST00000412585	-6.22531	5.92353	13.3418	0.000259559	0.014467	-
MSTRG.37561.3	NA	8	61500557	61714525	-	not_in_ref	not_in_ref	not_in_ref	not_in_ref	not_in_ref	no_EG	j	ENST00000379454	-6.77179	0.155202	13.3107	0.000263895	0.0146851	-
ENST00000238875	ENSG00000119862	2	64454092	64461381	+	LGALSL-001	protein_coding	ENSG00000119862	LGALSL	protein_coding	29094	E	ENST00000238875	-3.2303	0.547301	13.3049	0.000264719	0.0147073	-
ENST00000520470	ENSG00000188938	9	93446905	93453257	-	FAM120AOS-009	processed_transcript	ENSG00000188938	FAM120AOS	protein_coding	158293	E	ENST00000520470	-4.73641	0.686072	13.2938	0.00026628	0.0147705	-
MSTRG.36705.24	NA	7	151076716	151080761	-	not_in_ref	not_in_ref	not_in_ref	not_in_ref	not_in_ref	no_EG	j	ENST00000297532	-7.57376	2.27071	13.288	0.000267105	0.0147926	-
MSTRG.20535.8	NA	19	50205528	50310542	+	not_in_ref	not_in_ref	not_in_ref	not_in_ref	not_in_ref	no_EG	j	ENST00000601313	-7.55763	3.88127	13.2769	0.000268701	0.0148573	-
ENST00000367483	ENSG00000116690	1	186296279	186314562	+	PRG4-002	protein_coding	ENSG00000116690	PRG4	protein_coding	10216	E	ENST00000367483	-8.67737	2.17083	13.2608	0.000271013	0.0149613	-
ENST00000470099	ENSG00000118961	2	20684412	20739991	-	C2orf43-004	retained_intron	ENSG00000118961	C2orf43	protein_coding	60526	E	ENST00000470099	4.89485	-0.311697	13.2489	0.000272744	0.0150177	-
ENST00000327237	ENSG00000140688	16	31489489	31508413	-	C16orf58-001	protein_coding	ENSG00000140688	C16orf58	protein_coding	64755	E	ENST00000327237	-12.741	3.23205	13.2478	0.0002729	0.0150177	-
ENST00000236937	ENSG00000072694	1	161663147	161678022	+	FCGR2B-005	protein_coding	ENSG00000072694	FCGR2B	protein_coding	2213	E	ENST00000236937	-5.25027	0.816882	13.2331	0.000275043	0.0150679	-
MSTRG.39042.8	NA	9	65878766	65896997	+	not_in_ref	not_in_ref	not_in_ref	not_in_ref	not_in_ref	no_EG	j	ENST00000624547	4.29101	2.63801	13.2327	0.000275106	0.0150679	-
ENST00000377991	ENSG00000137103	9	35829232	35854847	+	TMEM8B-005	protein_coding	ENSG00000137103	TMEM8B	protein_coding	51754	E	ENST00000377991	-7.3545	1.63053	13.2327	0.000275114	0.0150679	-
MSTRG.22077.1	NA	2	86503430	86623028	-	not_in_ref	not_in_ref	not_in_ref	not_in_ref	not_in_ref	no_EG	j	ENST00000604011	-11.3538	0.854353	13.2141	0.000277857	0.0151942	-
MSTRG.19088.2	NA	19	4675224	4717616	-	not_in_ref	not_in_ref	not_in_ref	not_in_ref	not_in_ref	no_EG	j	ENST00000598800	-7.72891	2.75103	13.1309	0.00029046	0.0158584	-
ENST00000333202	ENSG00000184277	15	101641848	101652367	-	TM2D3-002	protein_coding	ENSG00000184277	TM2D3	protein_coding	80213	E	ENST00000333202	-5.70938	1.37003	13.1271	0.000291047	0.0158655	-
ENST00000463574	ENSG00000234745	6	31355122	31355802	-	HLA-B-005	retained_intron	ENSG00000234745	HLA-B	protein_coding	3106	E	ENST00000463574	-4.70618	3.19284	13.1166	0.00029269	0.01593	-
ENST00000372106	ENSG00000101888	X	109536876	109544690	+	NXT2-002	protein_coding	ENSG00000101888	NXT2	protein_coding	55916	E	ENST00000372106	-6.46527	2.20437	13.1023	0.000294941	0.0159908	-
ENST00000419828	ENSG00000172354	7	100673823	100679165	+	GNB2-004	protein_coding	ENSG00000172354	GNB2	protein_coding	2783	E	ENST00000419828	4.95881	4.00882	13.0996	0.00029536	0.0159908	-
ENST00000515671	ENSG00000138758	4	77034924	77040152	+	SEPT11-014	processed_transcript	ENSG00000138758	SEPT11	protein_coding	55752	E	ENST00000515671	3.44354	-0.101233	13.0988	0.000295481	0.0159908	-
MSTRG.16611.2	NA	17	31851867	31901673	-	not_in_ref	not_in_ref	not_in_ref	not_in_ref	not_in_ref	no_EG	j	ENST00000261708	0.71923	1.3555	13.0978	0.000295648	0.0159908	-
ENST00000530175	ENSG00000166483	11	9581544	9588701	+	WEE1-007	nonsense_mediated_decay	ENSG00000166483	WEE1	protein_coding	7465	noCuffcomp	noCuffcomp	-0.406483	-0.686896	13.0545	0.000302555	0.0163389	-
MSTRG.5508.23	NA	10	112951170	113167674	+	not_in_ref	not_in_ref	not_in_ref	not_in_ref	not_in_ref	no_EG	j	ENST00000542695	4.72627	3.75503	13.0413	0.000304701	0.016404	-
ENST00000444201	ENSG00000187210	9	76459152	76507414	+	GCNT1-202	protein_coding	ENSG00000187210	GCNT1	protein_coding	2650	E	ENST00000444201	-6.44314	0.357466	13.036	0.000305563	0.016404	-
ENST00000360814	ENSG00000120820	12	103988984	104050137	-	GLT8D2-002	protein_coding	ENSG00000120820	GLT8D2	protein_coding	83468	E	ENST00000360814	-6.52456	0.461938	13.0359	0.00030557	0.016404	-
ENST00000282251	ENSG00000152404	11	107326345	107457844	-	CWF19L2-001	protein_coding	ENSG00000152404	CWF19L2	protein_coding	143884	E	ENST00000282251	3.54862	2.3301	13.0355	0.000305649	0.016404	-
MSTRG.15004.24	NA	16	47660703	47700348	+	not_in_ref	not_in_ref	not_in_ref	not_in_ref	not_in_ref	no_EG	j	ENST00000566044	-6.86564	1.44603	13.0185	0.000308436	0.0165276	-
MSTRG.15476.5	NA	16	75111896	75115592	-	not_in_ref	not_in_ref	not_in_ref	not_in_ref	not_in_ref	no_EG	j	ENST00000300051	-7.34786	4.71302	13.0156	0.000308905	0.0165276	-
ENST00000550333	ENSG00000133641	12	88035505	88050158	+	C12orf29-003	nonsense_mediated_decay	ENSG00000133641	C12orf29	protein_coding	91298	E	ENST00000550333	-6.60285	2.56856	13.0115	0.000309586	0.0165386	-
MSTRG.34062.7	NA	6	112070812	112085774	-	not_in_ref	not_in_ref	not_in_ref	not_in_ref	not_in_ref	no_EG	j	ENST00000368662	-7.41877	0.665361	13.0043	0.000310773	0.0165765	-
MSTRG.14608.19	NA	16	21415006	21520010	-	not_in_ref	not_in_ref	not_in_ref	not_in_ref	not_in_ref	no_EG	j	ENST00000522480	-2.64123	0.146348	12.9998	0.000311531	0.0165914	-
ENST00000402093	ENSG00000219200	17	7012417	7014531	+	RNASEK-201	protein_coding	ENSG00000219200	RNASEK	protein_coding	440400	noCuffcomp	noCuffcomp	4.7465	0.196557	12.9694	0.000316624	0.0168368	-
MSTRG.29246.5	NA	4	40810088	41216714	-	not_in_ref	not_in_ref	not_in_ref	not_in_ref	not_in_ref	no_EG	j	ENST00000295974	3.09714	3.62405	12.9496	0.00031999	0.0169642	-
MSTRG.7498.4	NA	11	108767314	108940894	+	not_in_ref	not_in_ref	not_in_ref	not_in_ref	not_in_ref	no_EG	j	ENST00000322536	-5.70806	1.22887	12.9496	0.000319996	0.0169642	-
ENST00000543322	ENSG00000049883	5	72320367	72359352	+	PTCD2-202	protein_coding	ENSG00000049883	PTCD2	protein_coding	79810	E	ENST00000543322	4.61806	1.38505	12.9401	0.000321621	0.017012	-
MSTRG.35132.3	NA	7	30732432	30757602	+	not_in_ref	not_in_ref	not_in_ref	not_in_ref	not_in_ref	no_EG	o	ENST00000458257	-4.27303	1.9125	12.9386	0.000321879	0.017012	-
MSTRG.40846.5	NA	X	65512583	65528387	-	not_in_ref	not_in_ref	not_in_ref	not_in_ref	not_in_ref	no_EG	j	ENST00000374811	-5.40679	0.50138	12.9356	0.000322387	0.017013	-
ENST00000250263	ENSG00000104626	8	9002804	9033339	+	ERI1-201	protein_coding	ENSG00000104626	ERI1	protein_coding	90459	noCuffcomp	noCuffcomp	4.87495	1.48484	12.9301	0.000323346	0.0170377	-
MSTRG.38553.18	NA	9	684342	746104	+	not_in_ref	not_in_ref	not_in_ref	not_in_ref	not_in_ref	no_EG	j	ENST00000382303	-9.85851	3.07491	12.9204	0.000325017	0.0170998	-
ENST00000310054	ENSG00000167600	19	41193049	41207539	+	CYP2S1-001	protein_coding	ENSG00000167600	CYP2S1	protein_coding	29785	E	ENST00000310054	-3.83024	-0.204652	12.9067	0.000327412	0.0171998	-
ENST00000591234	ENSG00000154265	17	69247145	69286261	-	ABCA5-007	nonsense_mediated_decay	ENSG00000154265	ABCA5	protein_coding	23461	noCuffcomp	noCuffcomp	-0.559095	1.97701	12.8809	0.000331958	0.0173911	-
MSTRG.4034.6	NA	1	248850014	248858930	-	not_in_ref	not_in_ref	not_in_ref	not_in_ref	not_in_ref	no_EG	j	ENST00000451251	-5.45965	0.55591	12.8803	0.000332055	0.0173911	-
ENST00000381846	ENSG00000121897	4	39459072	39477621	+	LIAS-002	protein_coding	ENSG00000121897	LIAS	protein_coding	11019	E	ENST00000381846	-6.8923	1.98921	12.876	0.000332819	0.0173938	-
MSTRG.26752.6	NA	3	39052301	39096614	+	not_in_ref	not_in_ref	not_in_ref	not_in_ref	not_in_ref	no_EG	j	ENST00000420940	3.83367	2.54019	12.8744	0.000333109	0.0173938	-
MSTRG.34503.2	NA	6	151404846	151408666	-	not_in_ref	not_in_ref	not_in_ref	not_in_ref	not_in_ref	no_EG	j	ENST00000367303	3.25602	-0.340352	12.866	0.0003346	0.0174454	-
ENST00000551812	ENSG00000076108	12	56595930	56636379	-	BAZ2A-001	protein_coding	ENSG00000076108	BAZ2A	protein_coding	11176	E	ENST00000551812	-5.29822	2.01735	12.8527	0.000337001	0.0175442	-
MSTRG.1579.8	NA	1	78620510	78664078	+	not_in_ref	not_in_ref	not_in_ref	not_in_ref	not_in_ref	no_EG	j	ENST00000370751	-3.88513	4.08704	12.8464	0.000338134	0.0175769	-
ENST00000426925	ENSG00000131370	3	15255589	15333189	-	SH3BP5-002	protein_coding	ENSG00000131370	SH3BP5	protein_coding	9467	E	ENST00000426925	-4.8876	-0.829296	12.8246	0.000342097	0.0177563	-
ENST00000529978	ENSG00000250305	8	13012013	13026165	+	KIAA1456-006	retained_intron	ENSG00000250305	KIAA1456	protein_coding	57604	E	ENST00000529978	1.70178	-1.14547	12.7767	0.000350966	0.0181894	-
ENST00000369478	ENSG00000116824	1	116754385	116769228	+	CD2-001	protein_coding	ENSG00000116824	CD2	protein_coding	914	E	ENST00000369478	-6.2725	-1.01141	12.7652	0.000353122	0.0182547	-
ENST00000453527	ENSG00000164733	8	11844320	11868087	-	CTSB-006	protein_coding	ENSG00000164733	CTSB	protein_coding	1508	E	ENST00000453527	-6.88828	4.48442	12.7644	0.000353276	0.0182547	-
MSTRG.6558.3	NA	11	61299556	61333169	-	not_in_ref	not_in_ref	not_in_ref	not_in_ref	not_in_ref	no_EG	j	ENST00000540166	-7.74446	3.87862	12.7605	0.000354019	0.0182659	-
MSTRG.3037.1	NA	1	173714941	173787056	+	not_in_ref	not_in_ref	not_in_ref	not_in_ref	not_in_ref	no_EG	j	ENST00000209884	-7.42767	0.107991	12.7512	0.00035578	0.0183295	-
MSTRG.32157.3	NA	5	150053293	150086554	-	not_in_ref	not_in_ref	not_in_ref	not_in_ref	not_in_ref	no_EG	j	ENST00000286301	-6.84539	0.200624	12.7319	0.000359477	0.0184926	-
ENST00000452106	ENSG00000100395	22	41205324	41231271	+	L3MBTL2-005	nonsense_mediated_decay	ENSG00000100395	L3MBTL2	protein_coding	83746	E	ENST00000452106	-5.41525	2.06931	12.685	0.000368595	0.0189335	-
ENST00000321348	ENSG00000071967	2	171522348	171558133	+	CYBRD1-001	protein_coding	ENSG00000071967	CYBRD1	protein_coding	79901	E	ENST00000321348	5.37703	5.45208	12.6722	0.000371124	0.0190353	-
ENST00000417220	ENSG00000041880	3	51942345	51948862	+	PARP3-002	protein_coding	ENSG00000041880	PARP3	protein_coding	10039	E	ENST00000417220	-5.82118	0.942103	12.6595	0.000373653	0.0191368	-
ENST00000423684	ENSG00000223959	16	89977694	89984701	+	AFG3L1P-006	retained_intron	ENSG00000223959	AFG3L1P	unitary_pseudogene	172	E	ENST00000423684	-8.60768	-1.61591	12.6431	0.000376962	0.0192778	-
MSTRG.14532.17	NA	16	18334351	18346318	-	not_in_ref	not_in_ref	not_in_ref	not_in_ref	not_in_ref	no_EG	j	ENST00000525846	-5.76011	0.77608	12.6354	0.000378517	0.0193289	-
ENST00000517654	ENSG00000153310	8	129841484	130016451	-	FAM49B-009	protein_coding	ENSG00000153310	FAM49B	protein_coding	51571	E	ENST00000517654	0.42161	1.81534	12.6207	0.000381501	0.0193838	-
ENST00000310496	ENSG00000169733	17	82047902	82051774	-	RFNG-001	protein_coding	ENSG00000169733	RFNG	protein_coding	5986	E	ENST00000310496	-12.6997	0.556304	12.6206	0.00038152	0.0193838	-
ENST00000464385	ENSG00000078618	1	51789217	51789822	-	NRD1-010	processed_transcript	ENSG00000078618	NRD1	protein_coding	4898	E	ENST00000464385	4.67035	0.895426	12.6191	0.000381823	0.0193838	-
ENST00000474864	ENSG00000137404	6	30688047	30690974	-	NRM-006	processed_transcript	ENSG00000137404	NRM	protein_coding	11270	E	ENST00000474864	-5.98084	0.372858	12.6191	0.000381825	0.0193838	-
ENST00000287878	ENSG00000106617	7	151556111	151877125	-	PRKAG2-001	protein_coding	ENSG00000106617	PRKAG2	protein_coding	51422	E	ENST00000287878	-8.71882	2.79577	12.6099	0.000383704	0.0194507	-
MSTRG.34007.3	NA	6	109691404	109825422	+	not_in_ref	not_in_ref	not_in_ref	not_in_ref	not_in_ref	no_EG	j	ENST00000230124	4.39944	1.46696	12.6035	0.000385023	0.0194891	-
ENST00000420906	ENSG00000109685	4	1892845	1942575	+	WHSC1-006	protein_coding	ENSG00000109685	WHSC1	protein_coding	7468	E	ENST00000420906	4.17197	-0.737696	12.5504	0.000396117	0.0200215	-
ENST00000261368	ENSG00000064692	5	122312069	122464219	+	SNCAIP-001	protein_coding	ENSG00000064692	SNCAIP	protein_coding	9627	E	ENST00000261368	-6.85433	-0.313504	12.5447	0.000397337	0.0200374	-
ENST00000453910	ENSG00000215386	21	16419518	16607103	+	MIR99AHG-009	lincRNA	ENSG00000215386	MIR99AHG	lincRNA	388815	E	ENST00000453910	-7.236	-0.177474	12.5435	0.000397585	0.0200374	-
ENST00000370935	ENSG00000165675	X	130623369	130903234	-	ENOX2-003	protein_coding	ENSG00000165675	ENOX2	protein_coding	10495	E	ENST00000370935	1.50368	-1.5253	12.5223	0.000402125	0.0202368	-
ENST00000381707	ENSG00000184923	10	87225448	87234978	+	NUTM2A-001	protein_coding	ENSG00000184923	NUTM2A	protein_coding	728118	E	ENST00000381707	-5.02685	0.609151	12.5094	0.000404909	0.020347	-
ENST00000378858	ENSG00000125872	20	6040778	6054049	-	LRRN4-001	protein_coding	ENSG00000125872	LRRN4	protein_coding	164312	E	ENST00000378858	-4.10228	1.14144	12.5067	0.000405488	0.020347	-
MSTRG.10228.2	NA	13	28138267	28295328	+	not_in_ref	not_in_ref	not_in_ref	not_in_ref	not_in_ref	no_EG	j	ENST00000380958	-4.73545	0.113571	12.5012	0.000406685	0.0203566	-
ENST00000445964	ENSG00000168918	2	233060398	233207902	+	INPP5D-006	protein_coding	ENSG00000168918	INPP5D	protein_coding	3635	E	ENST00000445964	-4.4358	-0.107512	12.5005	0.000406852	0.0203566	-
ENST00000338523	ENSG00000086300	7	26291923	26374325	+	SNX10-002	protein_coding	ENSG00000086300	SNX10	protein_coding	29887	E	ENST00000338523	1.79729	-0.0497279	12.4959	0.000407839	0.0203767	-
ENST00000612719	ENSG00000251247	19	36851651	36879574	+	ZNF345-201	protein_coding	ENSG00000251247	ZNF345	protein_coding	25850	E	ENST00000612719	-6.38283	-0.572301	12.4799	0.000411346	0.0205224	-
MSTRG.17225.5	NA	17	48026171	48036906	-	not_in_ref	not_in_ref	not_in_ref	not_in_ref	not_in_ref	no_EG	j	ENST00000621465	-6.9763	2.18923	12.4352	0.000421324	0.0209901	-
MSTRG.39993.3	NA	9	133406062	133417959	-	not_in_ref	not_in_ref	not_in_ref	not_in_ref	not_in_ref	no_EG	j	ENST00000371942	-1.01543	1.75275	12.4256	0.000423498	0.0210681	-
ENST00000470705	ENSG00000132681	1	160177411	160186977	+	ATP1A4-006	protein_coding	ENSG00000132681	ATP1A4	protein_coding	480	E	ENST00000470705	-5.49505	-2.16996	12.4093	0.000427203	0.0211451	-
MSTRG.15172.3	NA	16	58113606	58129300	-	not_in_ref	not_in_ref	not_in_ref	not_in_ref	not_in_ref	no_EG	j	ENST00000262498	-4.77635	0.216146	12.4081	0.000427464	0.0211451	-
ENST00000552049	ENSG00000161835	12	52010521	52015887	+	GRASP-003	protein_coding	ENSG00000161835	GRASP	protein_coding	160622	E	ENST00000552049	-8.19354	-1.90567	12.4074	0.000427639	0.0211451	-
ENST00000590869	ENSG00000129351	19	10683756	10689492	+	ILF3-023	protein_coding	ENSG00000129351	ILF3	protein_coding	3609	E	ENST00000590869	-5.42517	0.382989	12.4047	0.000428245	0.0211451	-
MSTRG.33067.1	NA	6	30595487	30626392	+	not_in_ref	not_in_ref	not_in_ref	not_in_ref	not_in_ref	no_EG	o	ENST00000475993	0.909336	0.267701	12.4046	0.000428284	0.0211451	-
ENST00000287916	ENSG00000157224	7	90403386	90415954	+	CLDN12-001	protein_coding	ENSG00000157224	CLDN12	protein_coding	9069	E	ENST00000287916	-4.96289	1.20975	12.4006	0.000429205	0.0211451	-
ENST00000393080	ENSG00000196136	14	94612384	94624055	+	SERPINA3-007	protein_coding	ENSG00000196136	SERPINA3	protein_coding	12	E	ENST00000393080	-6.60593	3.02958	12.4001	0.000429307	0.0211451	-
MSTRG.32129.1	NA	5	149344708	149354582	+	not_in_ref	not_in_ref	not_in_ref	not_in_ref	not_in_ref	no_EG	j	ENST00000329271	-6.41394	0.108229	12.3793	0.000434126	0.0213521	-
ENST00000358813	ENSG00000115009	2	227813854	227817534	+	CCL20-004	protein_coding	ENSG00000115009	CCL20	protein_coding	6364	E	ENST00000358813	-5.81991	6.61013	12.371	0.000436045	0.0214161	-
MSTRG.26971.41	NA	3	48693785	48717192	-	not_in_ref	not_in_ref	not_in_ref	not_in_ref	not_in_ref	no_EG	j	ENST00000433104	-11.0905	-0.126467	12.3467	0.000441775	0.0216516	-
MSTRG.6115.12	NA	11	18080348	18105715	-	not_in_ref	not_in_ref	not_in_ref	not_in_ref	not_in_ref	no_EG	j	ENST00000524803	3.64521	0.486386	12.3449	0.000442197	0.0216516	-
ENST00000370938	ENSG00000116761	1	70411272	70439570	+	CTH-001	protein_coding	ENSG00000116761	CTH	protein_coding	1491	E	ENST00000370938	3.92161	2.55918	12.3427	0.000442709	0.0216516	-
ENST00000620797	ENSG00000115204	2	27309492	27312453	-	MPV17-006	processed_transcript	ENSG00000115204	MPV17	protein_coding	4358	E	ENST00000620797	4.44889	1.66377	12.3356	0.0004444	0.0216749	-
MSTRG.23998.131	NA	2	241560169	241574106	+	not_in_ref	not_in_ref	not_in_ref	not_in_ref	not_in_ref	no_EG	j	ENST00000318407	-10.3779	4.91309	12.3355	0.000444433	0.0216749	-
MSTRG.30275.5	NA	4	156761614	156971315	-	not_in_ref	not_in_ref	not_in_ref	not_in_ref	not_in_ref	no_EG	j	ENST00000506880	-8.82146	3.98035	12.3174	0.000448747	0.0218545	-
ENST00000263864	ENSG00000118640	2	85577491	85582031	+	VAMP8-001	protein_coding	ENSG00000118640	VAMP8	protein_coding	8673	E	ENST00000263864	-6.71189	0.188969	12.2965	0.000453805	0.0220547	-
ENST00000403712	ENSG00000035115	2	218136	264032	-	SH3YL1-002	protein_coding	ENSG00000035115	SH3YL1	protein_coding	26751	E	ENST00000403712	3.19459	1.66613	12.2952	0.000454127	0.0220547	-
ENST00000617869	ENSG00000155100	8	91070196	91087091	+	OTUD6B-202	protein_coding	ENSG00000155100	OTUD6B	protein_coding	51633	noCuffcomp	noCuffcomp	-7.53608	2.05415	12.2769	0.000458608	0.0222412	-
MSTRG.26534.12	NA	3	15560747	15601185	-	not_in_ref	not_in_ref	not_in_ref	not_in_ref	not_in_ref	no_EG	j	ENST00000321169	-8.06465	1.91059	12.2724	0.000459716	0.0222638	-
ENST00000215790	ENSG00000099992	22	30291990	30327046	-	TBC1D10A-001	protein_coding	ENSG00000099992	TBC1D10A	protein_coding	83874	E	ENST00000215790	-6.33084	1.38625	12.2688	0.000460595	0.0222753	-
MSTRG.38122.3	NA	8	119557085	119595996	-	not_in_ref	not_in_ref	not_in_ref	not_in_ref	not_in_ref	no_EG	j	ENST00000427067	3.58626	3.0375	12.2567	0.000463585	0.0223888	-
ENST00000312943	ENSG00000146094	5	177501907	177510385	-	DOK3-002	protein_coding	ENSG00000146094	DOK3	protein_coding	79930	E	ENST00000312943	3.91665	-1.53474	12.2251	0.000471511	0.0227399	-
MSTRG.15345.14	NA	16	69139012	69169022	+	not_in_ref	not_in_ref	not_in_ref	not_in_ref	not_in_ref	no_EG	j	ENST00000314423	-8.81004	2.00612	12.2187	0.000473122	0.0227616	-
ENST00000256969	ENSG00000134548	12	21526307	21532947	+	SPX-001	protein_coding	ENSG00000134548	SPX	protein_coding	NA	E	ENST00000256969	-4.97411	5.36272	12.2172	0.0004735	0.0227616	-
ENST00000534326	ENSG00000137216	6	44127639	44149261	+	TMEM63B-002	retained_intron	ENSG00000137216	TMEM63B	protein_coding	55362	E	ENST00000534326	-6.53764	0.429759	12.2156	0.000473927	0.0227616	-
MSTRG.9394.4	NA	12	88142307	88199861	+	not_in_ref	not_in_ref	not_in_ref	not_in_ref	not_in_ref	no_EG	j	ENST00000266712	-6.36039	2.16586	12.2067	0.000476183	0.0228384	-
MSTRG.36790.18	NA	7	157415405	157417439	+	not_in_ref	not_in_ref	not_in_ref	not_in_ref	not_in_ref	no_EG	j	ENST00000262177	4.63321	2.16231	12.1897	0.00048054	0.0230155	-
ENST00000452392	ENSG00000250264	6	32813767	32838822	-	XXbac-BPG246D15.9-001	protein_coding	ENSG00000250264	XXbac-BPG246D15.9	protein_coding	NA	E	ENST00000452392	-3.45005	-0.770361	12.1713	0.000485317	0.0232123	-
MSTRG.19856.4	NA	19	32597020	32675147	-	not_in_ref	not_in_ref	not_in_ref	not_in_ref	not_in_ref	no_EG	j	ENST00000306065	-5.65715	2.52781	12.1681	0.00048613	0.0232192	-
ENST00000368551	ENSG00000148803	10	133355203	133357737	-	FUOM-002	protein_coding	ENSG00000148803	FUOM	protein_coding	282969	E	ENST00000368551	3.36753	0.771104	12.1615	0.000487864	0.02327	-
ENST00000373383	ENSG00000094841	X	75274088	75304600	+	UPRT-001	protein_coding	ENSG00000094841	UPRT	protein_coding	139596	E	ENST00000373383	-3.59492	1.15432	12.1462	0.000491878	0.0234198	-
ENST00000542278	ENSG00000165195	X	15319451	15335554	-	PIGA-201	protein_coding	ENSG00000165195	PIGA	protein_coding	5277	E	ENST00000542278	-7.99116	1.00286	12.1444	0.000492352	0.0234198	-
ENST00000422643	ENSG00000106123	7	142862756	142871092	+	EPHB6-202	protein_coding	ENSG00000106123	EPHB6	protein_coding	2051	noCuffcomp	noCuffcomp	5.13131	2.74679	12.1314	0.000495798	0.0235514	-
MSTRG.31886.9	NA	5	135334435	135399204	-	not_in_ref	not_in_ref	not_in_ref	not_in_ref	not_in_ref	no_EG	j	ENST00000511689	-6.53818	1.84811	12.123	0.000498026	0.0236249	-
MSTRG.25307.8	NA	21	43792550	43805293	+	not_in_ref	not_in_ref	not_in_ref	not_in_ref	not_in_ref	no_EG	j	ENST00000497547	4.41855	2.47333	12.1176	0.000499474	0.0236613	-
ENST00000475833	ENSG00000124253	20	57561103	57562307	+	PCK1-003	retained_intron	ENSG00000124253	PCK1	protein_coding	NA	E	ENST00000475833	-5.28536	-0.81291	12.1084	0.000501952	0.0237463	-
ENST00000380241	ENSG00000047230	X	16588306	16712936	-	CTPS2-001	protein_coding	ENSG00000047230	CTPS2	protein_coding	56474	E	ENST00000380241	4.50697	1.28478	12.0953	0.000505493	0.0238813	-
ENST00000340736	ENSG00000072071	19	14147743	14206187	-	LPHN1-001	protein_coding	ENSG00000072071	LPHN1	protein_coding	22859	E	ENST00000340736	-4.33945	1.12057	12.0615	0.000514746	0.0242854	-
ENST00000344980	ENSG00000197647	19	12014758	12035710	-	ZNF433-005	protein_coding	ENSG00000197647	ZNF433	protein_coding	163059	E	ENST00000344980	-7.31539	-0.116691	12.0429	0.000519913	0.0244959	-
MSTRG.1793.3	NA	1	93179949	93278744	+	not_in_ref	not_in_ref	not_in_ref	not_in_ref	not_in_ref	no_EG	j	ENST00000343253	-4.72858	0.350727	12.0306	0.000523331	0.0246235	-
ENST00000288840	ENSG00000137834	15	66702228	66782848	+	SMAD6-001	protein_coding	ENSG00000137834	SMAD6	protein_coding	NA	E	ENST00000288840	4.18311	1.27237	12.012	0.000528597	0.0248214	-
ENST00000389447	ENSG00000172775	16	57153737	57173881	-	FAM192A-201	protein_coding	ENSG00000172775	FAM192A	protein_coding	80011	E	ENST00000389447	-8.32821	1.35102	12.0107	0.000528968	0.0248214	-
MSTRG.20710.9	NA	19	54190325	54193666	+	not_in_ref	not_in_ref	not_in_ref	not_in_ref	not_in_ref	no_EG	j	ENST00000429671	-5.81425	0.502771	11.9995	0.000532156	0.0249259	-
ENST00000420541	ENSG00000121858	3	172505662	172523475	-	TNFSF10-002	protein_coding	ENSG00000121858	TNFSF10	protein_coding	8743	E	ENST00000420541	2.60508	1.32993	11.9978	0.000532629	0.0249259	-
MSTRG.4158.3	NA	10	11455388	11611473	-	not_in_ref	not_in_ref	not_in_ref	not_in_ref	not_in_ref	no_EG	j	ENST00000609104	4.73846	1.31624	11.9885	0.000535294	0.0250169	-
MSTRG.4893.15	NA	10	73375445	73414016	-	not_in_ref	not_in_ref	not_in_ref	not_in_ref	not_in_ref	no_EG	j	ENST00000372919	-4.2315	1.78195	11.9732	0.00053972	0.0251617	-
MSTRG.28528.13	NA	3	183015289	183037436	-	not_in_ref	not_in_ref	not_in_ref	not_in_ref	not_in_ref	no_EG	j	ENST00000497959	4.38288	2.21192	11.9728	0.000539842	0.0251617	-
ENST00000295962	ENSG00000163686	3	58237532	58294734	+	ABHD6-002	protein_coding	ENSG00000163686	ABHD6	protein_coding	57406	E	ENST00000295962	3.37539	0.724037	11.9505	0.000546331	0.02543	-
ENST00000597512	ENSG00000130475	19	17762703	17788538	+	FCHO1-006	protein_coding	ENSG00000130475	FCHO1	protein_coding	23149	E	ENST00000597512	-10.0728	-1.39201	11.908	0.000558942	0.0259822	-
MSTRG.36791.13	NA	7	152135279	152163797	-	not_in_ref	not_in_ref	not_in_ref	not_in_ref	not_in_ref	no_EG	j	ENST00000558084	-4.67363	1.81758	11.8897	0.000564438	0.0262026	-
ENST00000469467	ENSG00000164889	7	151075983	151076524	+	SLC4A2-021	retained_intron	ENSG00000164889	SLC4A2	protein_coding	6522	E	ENST00000469467	3.67188	-1.17727	11.8864	0.000565448	0.0262144	-
ENST00000367309	ENSG00000174307	1	201465958	201469237	-	PHLDA3-002	protein_coding	ENSG00000174307	PHLDA3	protein_coding	NA	E	ENST00000367309	-5.90399	2.62512	11.8752	0.000568875	0.0263238	-
MSTRG.14016.5	NA	15	101632978	101652280	-	not_in_ref	not_in_ref	not_in_ref	not_in_ref	not_in_ref	no_EG	j	ENST00000333202	4.18651	1.78858	11.8737	0.000569323	0.0263238	-
ENST00000340828	ENSG00000113328	5	163437581	163445016	+	CCNG1-001	protein_coding	ENSG00000113328	CCNG1	protein_coding	900	E	ENST00000340828	5.42035	4.59409	11.865	0.000571982	0.0264116	-
MSTRG.19488.4	NA	19	14477764	14496072	-	not_in_ref	not_in_ref	not_in_ref	not_in_ref	not_in_ref	no_EG	j	ENST00000393033	-4.58219	1.85437	11.8619	0.000572948	0.026421	-
MSTRG.25365.9	NA	21	45512558	45544243	-	not_in_ref	not_in_ref	not_in_ref	not_in_ref	not_in_ref	no_EG	j	ENST00000311124	-6.29442	1.71685	11.8516	0.00057613	0.0265325	-
ENST00000554980	ENSG00000119699	14	75958099	75966722	-	TGFB3-003	retained_intron	ENSG00000119699	TGFB3	protein_coding	NA	E	ENST00000554980	-3.58431	-1.26314	11.8337	0.000581669	0.0267522	-
MSTRG.25210.29	NA	21	33576263	33577481	+	not_in_ref	not_in_ref	not_in_ref	not_in_ref	not_in_ref	no_EG	j	ENST00000455528	4.56141	3.27594	11.8194	0.000586173	0.0269237	-
MSTRG.23773.14	NA	2	230417591	230545673	+	not_in_ref	not_in_ref	not_in_ref	not_in_ref	not_in_ref	no_EG	j	ENST00000340126	-5.16041	3.54046	11.8091	0.000589429	0.0270375	-
ENST00000201031	ENSG00000087510	20	56629302	56639283	+	TFAP2C-001	protein_coding	ENSG00000087510	TFAP2C	protein_coding	7022	E	ENST00000201031	-4.09563	-0.830877	11.797	0.000593264	0.0271698	-
ENST00000433667	ENSG00000122515	7	44756188	44768694	+	ZMIZ2-004	protein_coding	ENSG00000122515	ZMIZ2	protein_coding	83637	E	ENST00000433667	-5.78557	2.52335	11.7951	0.000593879	0.0271698	-
MSTRG.26452.9	NA	3	10006344	10011114	-	not_in_ref	not_in_ref	not_in_ref	not_in_ref	not_in_ref	no_EG	j	ENST00000383808	4.4741	1.88281	11.7901	0.000595467	0.0272066	-
ENST00000407997	ENSG00000239713	22	39077005	39087743	+	APOBEC3G-001	protein_coding	ENSG00000239713	APOBEC3G	protein_coding	60489	E	ENST00000407997	-4.91826	-0.0869237	11.7708	0.000601678	0.0274542	-
MSTRG.5149.1	NA	10	91162525	91284307	+	not_in_ref	not_in_ref	not_in_ref	not_in_ref	not_in_ref	no_EG	j	ENST00000543648	4.11861	3.75592	11.7653	0.000603455	0.0274992	-
ENST00000394235	ENSG00000109381	4	139057220	139177218	-	ELF2-001	protein_coding	ENSG00000109381	ELF2	protein_coding	1998	E	ENST00000394235	-5.27612	-0.819922	11.7598	0.00060524	0.0275444	-
MSTRG.10340.13	NA	13	37009497	37047347	-	not_in_ref	not_in_ref	not_in_ref	not_in_ref	not_in_ref	no_EG	j	ENST00000350612	-4.3972	1.2509	11.7533	0.000607363	0.0276048	-
ENST00000618786	ENSG00000276168	14	49586580	49586878	+	RN7SL1-201	misc_RNA	ENSG00000276168	RN7SL1	misc_RNA	NA	noCuffcomp	noCuffcomp	-8.94198	4.5695	11.7487	0.000608861	0.0276129	-
MSTRG.32308.4	NA	5	160010547	160065487	+	not_in_ref	not_in_ref	not_in_ref	not_in_ref	not_in_ref	no_EG	j	ENST00000231238	-4.44068	1.19291	11.7477	0.000609171	0.0276129	-
ENST00000159111	ENSG00000127663	19	4969121	5153595	+	KDM4B-001	protein_coding	ENSG00000127663	KDM4B	protein_coding	23030	E	ENST00000159111	3.33764	3.31353	11.7454	0.000609926	0.0276129	-
MSTRG.34951.3	NA	7	17790773	17940466	-	not_in_ref	not_in_ref	not_in_ref	not_in_ref	not_in_ref	no_EG	j	ENST00000409076	5.27148	4.06917	11.742	0.000611066	0.0276285	-
MSTRG.20747.50	NA	19	54663758	54668230	+	not_in_ref	not_in_ref	not_in_ref	not_in_ref	not_in_ref	no_EG	j	ENST00000391736	-5.51528	1.77675	11.7341	0.00061366	0.0277097	-
ENST00000508579	ENSG00000153113	5	96741874	96772813	+	CAST-037	protein_coding	ENSG00000153113	CAST	protein_coding	831	E	ENST00000508579	-4.94989	-1.16694	11.7127	0.000620738	0.0279929	-
ENST00000271324	ENSG00000143119	1	110873154	110899928	+	CD53-001	protein_coding	ENSG00000143119	CD53	protein_coding	963	E	ENST00000271324	-4.9327	2.84585	11.7028	0.000624057	0.0281061	-
MSTRG.3798.3	NA	1	230702824	230709130	-	not_in_ref	not_in_ref	not_in_ref	not_in_ref	not_in_ref	no_EG	j	ENST00000366667	-4.07465	1.70421	11.6991	0.000625304	0.0281257	-
ENST00000368804	ENSG00000159450	1	152106317	152114080	-	TCHH-001	protein_coding	ENSG00000159450	TCHH	protein_coding	7062	noCuffcomp	noCuffcomp	-4.06649	0.0871097	11.6964	0.000626195	0.0281294	-
MSTRG.19196.3	NA	19	8580250	8608193	-	not_in_ref	not_in_ref	not_in_ref	not_in_ref	not_in_ref	no_EG	j	ENST00000597188	-5.01207	0.374272	11.691	0.00062803	0.0281636	-
MSTRG.27948.21	NA	3	132680740	132722311	-	not_in_ref	not_in_ref	not_in_ref	not_in_ref	not_in_ref	no_EG	j	ENST00000471702	-8.61365	1.71728	11.6894	0.000628579	0.0281636	-
MSTRG.41087.5	NA	X	96684724	97604997	+	not_in_ref	not_in_ref	not_in_ref	not_in_ref	not_in_ref	no_EG	j	ENST00000373054	-4.80958	3.80027	11.6859	0.00062976	0.0281801	-
ENST00000360957	ENSG00000104881	19	45379634	45405038	-	PPP1R13L-001	protein_coding	ENSG00000104881	PPP1R13L	protein_coding	10848	E	ENST00000360957	-6.03201	1.05085	11.6753	0.00063337	0.0283052	-
ENST00000559608	ENSG00000140332	15	70049801	70051505	-	TLE3-029	retained_intron	ENSG00000140332	TLE3	protein_coding	7090	E	ENST00000559608	-5.95189	-0.460492	11.6517	0.000641439	0.028629	-
ENST00000573320	ENSG00000185359	17	81700792	81701974	+	HGS-018	protein_coding	ENSG00000185359	HGS	protein_coding	9146	noCuffcomp	noCuffcomp	3.10317	1.61347	11.6301	0.000648914	0.0289254	-
MSTRG.41576.9	NA	X	154398377	154403497	+	not_in_ref	not_in_ref	not_in_ref	not_in_ref	not_in_ref	no_EG	j	ENST00000369817	3.84353	-0.492776	11.6049	0.000657772	0.0292826	-
ENST00000381039	ENSG00000122257	16	24540520	24572863	+	RBBP6-005	protein_coding	ENSG00000122257	RBBP6	protein_coding	5930	E	ENST00000381039	-7.64506	1.67231	11.5917	0.000662484	0.0294547	-
ENST00000282701	ENSG00000152785	4	81030965	81057531	+	BMP3-001	protein_coding	ENSG00000152785	BMP3	protein_coding	651	E	ENST00000282701	-4.67776	5.00265	11.5805	0.000666481	0.0295945	-
MSTRG.11856.46	NA	14	73904032	73932247	+	not_in_ref	not_in_ref	not_in_ref	not_in_ref	not_in_ref	no_EG	j	ENST00000556551	4.61899	2.08401	11.5686	0.000670736	0.0297454	-
MSTRG.22323.14	NA	2	102142306	102179874	+	not_in_ref	not_in_ref	not_in_ref	not_in_ref	not_in_ref	no_EG	j	ENST00000410023	-7.13383	3.32022	11.5571	0.000674924	0.0298929	-
MSTRG.14019.10	NA	15	101655997	101714957	-	not_in_ref	not_in_ref	not_in_ref	not_in_ref	not_in_ref	no_EG	j	ENST00000539112	-4.68053	0.450965	11.5375	0.000682066	0.0301708	-
ENST00000589454	ENSG00000130811	19	10115534	10119864	-	EIF3G-006	protein_coding	ENSG00000130811	EIF3G	protein_coding	8666	noCuffcomp	noCuffcomp	-10.6371	3.43789	11.5192	0.000688792	0.0304296	-
ENST00000259470	ENSG00000136943	9	97032658	97039310	-	CTSV-001	protein_coding	ENSG00000136943	CTSV	protein_coding	1515	E	ENST00000259470	-5.12806	-1.69271	11.5084	0.000692812	0.0305405	-
ENST00000306999	ENSG00000106524	7	16599776	16645817	-	ANKMY2-001	protein_coding	ENSG00000106524	ANKMY2	protein_coding	57037	E	ENST00000306999	-6.74822	0.623089	11.5041	0.00069442	0.0305405	-
ENST00000445930	ENSG00000100519	14	52707172	52728587	+	PSMC6-001	protein_coding	ENSG00000100519	PSMC6	protein_coding	5706	E	ENST00000445930	-11.001	-2.80663	11.5033	0.000694711	0.0305405	-
MSTRG.36553.6	NA	7	140674621	140695083	+	not_in_ref	not_in_ref	not_in_ref	not_in_ref	not_in_ref	no_EG	j	ENST00000072869	3.3459	1.63407	11.503	0.000694821	0.0305405	-
MSTRG.39883.1	NA	9	128729786	128771766	-	not_in_ref	not_in_ref	not_in_ref	not_in_ref	not_in_ref	no_EG	j	ENST00000291900	-5.82114	2.72127	11.4901	0.000699679	0.0307151	-
MSTRG.782.6	NA	1	31908653	31938297	-	not_in_ref	not_in_ref	not_in_ref	not_in_ref	not_in_ref	no_EG	j	ENST00000532001	-6.18576	0.807159	11.4857	0.000701334	0.0307489	-
MSTRG.32786.5	NA	6	12012000	12164928	+	not_in_ref	not_in_ref	not_in_ref	not_in_ref	not_in_ref	no_EG	j	ENST00000379388	-6.94303	2.40908	11.4809	0.000703161	0.030757	-
MSTRG.22969.16	NA	2	169604040	169641355	+	not_in_ref	not_in_ref	not_in_ref	not_in_ref	not_in_ref	no_EG	j	ENST00000260970	5.03461	2.81281	11.4805	0.00070329	0.030757	-
MSTRG.2824.15	NA	1	161171312	161177494	-	not_in_ref	not_in_ref	not_in_ref	not_in_ref	not_in_ref	no_EG	j	ENST00000622395	-3.96311	-0.604705	11.4666	0.000708573	0.030949	-
MSTRG.6613.3	NA	11	62771367	62782755	+	not_in_ref	not_in_ref	not_in_ref	not_in_ref	not_in_ref	no_EG	j	ENST00000294168	-4.964	-0.722423	11.4548	0.000713104	0.0311078	-
ENST00000493306	ENSG00000136826	9	107484852	107489437	-	KLF4-003	retained_intron	ENSG00000136826	KLF4	protein_coding	9314	E	ENST00000493306	-5.84325	1.71591	11.4456	0.000716648	0.0312232	-
ENST00000317677	ENSG00000214078	20	35626044	35653677	-	CPNE1-005	protein_coding	ENSG00000214078	CPNE1	protein_coding	8904	noCuffcomp	noCuffcomp	-3.65966	3.54	11.4382	0.000719499	0.0313081	-
ENST00000541903	ENSG00000141252	17	519119	522995	-	VPS53-017	processed_transcript	ENSG00000141252	VPS53	protein_coding	55275	E	ENST00000541903	-6.15016	-0.706017	11.4336	0.000721284	0.0313403	-
ENST00000527481	ENSG00000105397	19	10350947	10354522	-	TYK2-020	nonsense_mediated_decay	ENSG00000105397	TYK2	protein_coding	7297	E	ENST00000527481	-5.99537	0.0951331	11.4316	0.000722044	0.0313403	-
MSTRG.4260.2	NA	10	17644195	17715854	+	not_in_ref	not_in_ref	not_in_ref	not_in_ref	not_in_ref	no_EG	j	ENST00000377524	-6.6056	2.51289	11.4261	0.000724189	0.0313942	-
ENST00000542580	ENSG00000172037	3	49124443	49125204	-	LAMB2-019	retained_intron	ENSG00000172037	LAMB2	protein_coding	3913	E	ENST00000542580	-4.27148	1.65159	11.4095	0.000730682	0.0316361	-
ENST00000427123	ENSG00000115234	2	27370628	27377123	+	SNX17-003	nonsense_mediated_decay	ENSG00000115234	SNX17	protein_coding	9784	E	ENST00000427123	-5.12455	1.85981	11.4006	0.000734203	0.031749	-
MSTRG.23039.15	NA	2	173908532	173965310	-	not_in_ref	not_in_ref	not_in_ref	not_in_ref	not_in_ref	no_EG	j	ENST00000310015	4.05043	4.35695	11.3932	0.000737152	0.031819	-
ENST00000548033	ENSG00000004455	1	33010478	33036840	-	AK2-010	protein_coding	ENSG00000004455	AK2	protein_coding	204	E	ENST00000548033	-9.09675	0.0630545	11.3919	0.000737655	0.031819	-
ENST00000438792	ENSG00000126777	14	55580315	55684579	+	KTN1-004	protein_coding	ENSG00000126777	KTN1	protein_coding	3895	E	ENST00000438792	-10.2405	5.38398	11.3829	0.000741231	0.0319045	-
MSTRG.1155.4	NA	1	46557410	46585560	-	not_in_ref	not_in_ref	not_in_ref	not_in_ref	not_in_ref	no_EG	j	ENST00000371946	-6.96698	1.91037	11.3823	0.000741474	0.0319045	-
ENST00000500704	ENSG00000123552	6	99432379	99515425	-	USP45-008	protein_coding	ENSG00000123552	USP45	protein_coding	85015	E	ENST00000500704	-5.00148	0.530007	11.3648	0.00074848	0.0321661	-
ENST00000618804	ENSG00000148541	10	59246129	59362550	-	FAM13C-001	protein_coding	ENSG00000148541	FAM13C	protein_coding	220965	E	ENST00000618804	-8.5632	1.94448	11.3595	0.000750618	0.0322029	-
ENST00000578000	ENSG00000204650	17	45638975	45642300	+	CRHR1-IT1-013	processed_transcript	ENSG00000204650	CRHR1-IT1	transcribed_unprocessed_pseudogene	147081;401884	E	ENST00000578000	3.81161	-0.677517	11.3581	0.000751191	0.0322029	-
MSTRG.11964.3	NA	14	77672530	77707898	-	not_in_ref	not_in_ref	not_in_ref	not_in_ref	not_in_ref	no_EG	j	ENST00000216489	4.69483	0.516624	11.3462	0.000756035	0.0323706	-
ENST00000368013	ENSG00000186517	1	161046948	161069945	-	ARHGAP30-007	protein_coding	ENSG00000186517	ARHGAP30	protein_coding	257106	E	ENST00000368013	-5.41834	2.03848	11.3411	0.000758101	0.0324191	-
MSTRG.19899.11	NA	19	34365022	34400327	+	not_in_ref	not_in_ref	not_in_ref	not_in_ref	not_in_ref	no_EG	j	ENST00000588991	-9.07603	6.35732	11.3317	0.000761959	0.032544	-
ENST00000602153	ENSG00000105193	19	39433223	39433761	-	RPS16-009	protein_coding	ENSG00000105193	RPS16	protein_coding	6217	E	ENST00000602153	-5.23449	0.171655	11.3114	0.000770337	0.0328614	-
MSTRG.15104.2	NA	16	55802853	55833158	-	not_in_ref	not_in_ref	not_in_ref	not_in_ref	not_in_ref	no_EG	j	ENST00000422046	5.10629	4.53329	11.2868	0.000780586	0.0332577	-
MSTRG.14494.12	NA	16	15652373	15726335	+	not_in_ref	not_in_ref	not_in_ref	not_in_ref	not_in_ref	no_EG	j	ENST00000396355	-7.09809	-0.606737	11.2658	0.00078949	0.0335959	-
ENST00000558018	ENSG00000140545	15	88898683	88913379	-	MFGE8-005	nonsense_mediated_decay	ENSG00000140545	MFGE8	protein_coding	4240	E	ENST00000558018	-5.79583	0.305716	11.2484	0.000796896	0.0338451	-
ENST00000430334	ENSG00000225190	17	45435900	45490744	-	PLEKHM1-001	protein_coding	ENSG00000225190	PLEKHM1	protein_coding	9842	E	ENST00000430334	-5.87734	2.52417	11.246	0.00079796	0.0338451	-
ENST00000618940	ENSG00000006125	17	35587515	35724086	+	AP2B1-201	protein_coding	ENSG00000006125	AP2B1	protein_coding	163	E	ENST00000618940	-4.86275	3.04342	11.2453	0.00079827	0.0338451	-
ENST00000356284	ENSG00000112562	6	168441151	168667994	+	SMOC2-001	protein_coding	ENSG00000112562	SMOC2	protein_coding	64094	E	ENST00000356284	-3.48769	2.74774	11.2358	0.000802331	0.0339758	-
ENST00000527898	ENSG00000019144	11	118631916	118658025	+	PHLDB1-009	processed_transcript	ENSG00000019144	PHLDB1	protein_coding	23187	noCuffcomp	noCuffcomp	-7.33536	5.14837	11.2314	0.000804266	0.0340162	-
MSTRG.39629.11	NA	9	113255609	113264492	+	not_in_ref	not_in_ref	not_in_ref	not_in_ref	not_in_ref	no_EG	j	ENST00000374212	-7.447	2.34187	11.2262	0.000806512	0.0340697	-
ENST00000380605	ENSG00000088882	20	2794069	2800637	-	CPXM1-001	protein_coding	ENSG00000088882	CPXM1	protein_coding	56265	E	ENST00000380605	-6.64301	1.99752	11.218	0.000810066	0.0341783	-
ENST00000547568	ENSG00000011465	12	91146058	91182805	-	DCN-006	protein_coding	ENSG00000011465	DCN	protein_coding	1634	E	ENST00000547568	-7.27394	2.77083	11.1859	0.000824193	0.0347321	-
ENST00000236412	ENSG00000117751	1	27830814	27851528	+	PPP1R8-003	protein_coding	ENSG00000117751	PPP1R8	protein_coding	5511	E	ENST00000236412	-7.79144	0.722822	11.1754	0.000828899	0.0348881	-
ENST00000397081	ENSG00000091428	2	172735841	173052887	+	RAPGEF4-001	protein_coding	ENSG00000091428	RAPGEF4	protein_coding	11069	E	ENST00000397081	3.5728	0.555812	11.1498	0.000840413	0.0353299	-
ENST00000630983	ENSG00000186184	13	27621875	27667410	+	POLR1D-005	protein_coding	ENSG00000186184	POLR1D	protein_coding	51082	E	ENST00000630983	3.1866	3.04946	11.144	0.000843022	0.0353967	-
ENST00000569566	ENSG00000102854	16	762524	765036	+	MSLN-007	protein_coding	ENSG00000102854	MSLN	protein_coding	10232	E	ENST00000569566	-5.41549	2.0871	11.1404	0.000844675	0.0354233	-
ENST00000319331	ENSG00000175928	3	3799437	3847703	+	LRRN1-001	protein_coding	ENSG00000175928	LRRN1	protein_coding	57633	E	ENST00000319331	-3.87126	-0.532325	11.1145	0.000856543	0.0358777	-
MSTRG.17666.1	NA	17	64499616	64507273	-	not_in_ref	not_in_ref	not_in_ref	not_in_ref	not_in_ref	no_EG	j	ENST00000225792	-5.1008	-0.570253	11.1094	0.000858906	0.0359333	-
MSTRG.27037.26	NA	3	50290181	50291847	-	not_in_ref	not_in_ref	not_in_ref	not_in_ref	not_in_ref	no_EG	j	ENST00000436390	-6.96394	-1.08434	11.0836	0.000870953	0.0363935	-
ENST00000578653	ENSG00000160551	17	29522288	29530738	+	TAOK1-005	retained_intron	ENSG00000160551	TAOK1	protein_coding	57551	E	ENST00000578653	-0.321304	-1.18499	11.0777	0.000873743	0.0364183	-
ENST00000472059	ENSG00000072210	17	19648851	19677596	+	ALDH3A2-003	nonsense_mediated_decay	ENSG00000072210	ALDH3A2	protein_coding	224	E	ENST00000472059	-5.09919	2.6016	11.0771	0.000874024	0.0364183	-
MSTRG.13513.69	NA	15	72343887	72376003	-	not_in_ref	not_in_ref	not_in_ref	not_in_ref	not_in_ref	no_EG	j	ENST00000379915	-5.88725	2.20073	11.0756	0.000874694	0.0364183	-
ENST00000590665	ENSG00000152234	18	46084150	46098296	-	ATP5A1-009	protein_coding	ENSG00000152234	ATP5A1	protein_coding	498	E	ENST00000590665	5.54907	5.10842	11.0728	0.000876014	0.0364296	-
ENST00000402291	ENSG00000162929	2	61065933	61124280	+	KIAA1841-003	protein_coding	ENSG00000162929	KIAA1841	protein_coding	84542	E	ENST00000402291	-6.20233	0.909101	11.0571	0.000883472	0.0366612	-
ENST00000524606	ENSG00000129084	11	14504874	14511031	-	PSMA1-021	processed_transcript	ENSG00000129084	PSMA1	protein_coding	5682	E	ENST00000524606	3.3588	2.46211	11.0567	0.000883695	0.0366612	-
ENST00000605660	ENSG00000196422	9	135484392	135488893	+	PPP1R26-003	protein_coding	ENSG00000196422	PPP1R26	protein_coding	9858	E	ENST00000605660	-4.83079	2.59046	11.0536	0.00088517	0.0366786	-
MSTRG.12928.20	NA	15	41841829	41848140	+	not_in_ref	not_in_ref	not_in_ref	not_in_ref	not_in_ref	no_EG	j	ENST00000382448	-7.03381	-0.500035	11.0504	0.000886683	0.0366975	-
MSTRG.1685.13	NA	1	89107959	89126174	-	not_in_ref	not_in_ref	not_in_ref	not_in_ref	not_in_ref	no_EG	j	ENST00000464839	3.27483	6.84295	11.0424	0.000890496	0.0367687	-
ENST00000392322	ENSG00000115415	2	190975537	191014168	-	STAT1-003	protein_coding	ENSG00000115415	STAT1	protein_coding	6772	E	ENST00000392322	2.9436	5.99071	11.0424	0.000890521	0.0367687	-
MSTRG.13407.37	NA	15	65659261	65761415	-	not_in_ref	not_in_ref	not_in_ref	not_in_ref	not_in_ref	no_EG	j	ENST00000443035	-4.74352	1.8256	11.0321	0.000895469	0.0368663	-
MSTRG.26297.35	NA	22	50579804	50582420	-	not_in_ref	not_in_ref	not_in_ref	not_in_ref	not_in_ref	no_EG	j	ENST00000492556	-4.26278	0.10058	11.0309	0.000896067	0.0368663	-
ENST00000286096	ENSG00000155666	16	27203495	27221768	+	KDM8-001	protein_coding	ENSG00000155666	KDM8	protein_coding	79831	E	ENST00000286096	-7.07101	-0.462729	11.0309	0.000896071	0.0368663	-
ENST00000555698	ENSG00000129538	14	20801394	20802848	-	RNASE1-005	protein_coding	ENSG00000129538	RNASE1	protein_coding	6035	E	ENST00000555698	-3.41573	4.38563	11.0275	0.00089769	0.0368892	-
MSTRG.39895.3	NA	9	128819713	128829153	-	not_in_ref	not_in_ref	not_in_ref	not_in_ref	not_in_ref	no_EG	j	ENST00000361256	-4.69703	0.0962009	11.0158	0.00090339	0.0370796	-
ENST00000477601	ENSG00000144802	3	101855733	101859527	+	NFKBIZ-012	protein_coding	ENSG00000144802	NFKBIZ	protein_coding	64332	noCuffcomp	noCuffcomp	-4.21534	1.38848	11.0134	0.00090456	0.0370838	-
MSTRG.5040.8	NA	10	80408712	80432997	+	not_in_ref	not_in_ref	not_in_ref	not_in_ref	not_in_ref	no_EG	j	ENST00000606162	-7.40404	1.07638	10.9896	0.000916236	0.0375181	-
MSTRG.38964.1	NA	9	41373439	41373913	+	not_in_ref	not_in_ref	not_in_ref	not_in_ref	not_in_ref	no_EG	u	NA	4.31464	-0.419537	10.9778	0.000922091	0.0377134	-
MSTRG.1685.3	NA	1	89102980	89147569	-	not_in_ref	not_in_ref	not_in_ref	not_in_ref	not_in_ref	no_EG	j	ENST00000464839	-6.48186	1.81446	10.9724	0.000924806	0.0377185	-
MSTRG.32125.6	NA	5	149141598	149260439	+	not_in_ref	not_in_ref	not_in_ref	not_in_ref	not_in_ref	no_EG	j	ENST00000309868	3.09864	2.08845	10.9705	0.000925752	0.0377185	-
ENST00000511946	ENSG00000189157	4	76278119	76283774	+	FAM47E-011	processed_transcript	ENSG00000189157	FAM47E	protein_coding	100129583	noCuffcomp	noCuffcomp	3.76862	0.437847	10.9692	0.000926391	0.0377185	-
ENST00000599857	ENSG00000062822	19	50384351	50418014	+	POLD1-001	protein_coding	ENSG00000062822	POLD1	protein_coding	5424	E	ENST00000599857	-7.85958	1.41466	10.9689	0.00092656	0.0377185	-
MSTRG.24437.4	NA	20	35115364	35147243	-	not_in_ref	not_in_ref	not_in_ref	not_in_ref	not_in_ref	no_EG	j	ENST00000374492	-1.66503	0.258311	10.9552	0.000933388	0.037952	-
MSTRG.10642.1	NA	13	76593028	76593297	+	not_in_ref	not_in_ref	not_in_ref	not_in_ref	not_in_ref	no_EG	u	NA	1.66597	-0.904895	10.9497	0.000936193	0.0380215	-
MSTRG.9391.1	NA	12	88048898	88142035	-	not_in_ref	not_in_ref	not_in_ref	not_in_ref	not_in_ref	no_EG	j	ENST00000552810	-4.97794	0.443718	10.9429	0.000939624	0.0381162	-
ENST00000264663	ENSG00000112992	5	43602723	43707405	+	NNT-001	protein_coding	ENSG00000112992	NNT	protein_coding	23530	E	ENST00000264663	3.65402	2.30173	10.9393	0.000941433	0.0381451	-
MSTRG.27103.1	NA	3	52903435	53046663	-	not_in_ref	not_in_ref	not_in_ref	not_in_ref	not_in_ref	no_EG	j	ENST00000394752	-11.232	1.23959	10.9323	0.00094502	0.0382458	-
ENST00000392587	ENSG00000112290	6	110099819	110179702	-	WASF1-004	protein_coding	ENSG00000112290	WASF1	protein_coding	8936	E	ENST00000392587	-9.98266	0.746392	10.9251	0.000948704	0.0383502	-
ENST00000509606	ENSG00000133835	5	119527158	119542332	+	HSD17B4-020	retained_intron	ENSG00000133835	HSD17B4	protein_coding	3295	noCuffcomp	noCuffcomp	-6.66184	2.91715	10.9215	0.000950528	0.0383792	-
ENST00000419884	ENSG00000138095	2	43888278	43899284	-	LRPPRC-009	protein_coding	ENSG00000138095	LRPPRC	protein_coding	10128	noCuffcomp	noCuffcomp	4.58948	2.03153	10.9155	0.000953623	0.0384595	-
MSTRG.1931.16	NA	1	109915657	109926743	+	not_in_ref	not_in_ref	not_in_ref	not_in_ref	not_in_ref	no_EG	j	ENST00000329608	2.84982	4.75073	10.9081	0.000957431	0.0385683	-
ENST00000372230	ENSG00000080189	20	46349528	46364395	-	SLC35C2-013	protein_coding	ENSG00000080189	SLC35C2	protein_coding	51006	E	ENST00000372230	-8.11087	3.73132	10.8854	0.000969231	0.0389984	-
ENST00000472326	ENSG00000127990	7	94585470	94599137	-	SGCE-010	retained_intron	ENSG00000127990	SGCE	protein_coding	8910	E	ENST00000472326	0.759894	-0.0105968	10.881	0.000971576	0.0390475	-
ENST00000538932	ENSG00000179195	12	123973215	124015439	+	ZNF664-002	protein_coding	ENSG00000179195	ZNF664	protein_coding	144348	E	ENST00000538932	3.64079	2.37403	10.8556	0.000984968	0.0395399	-
ENST00000561736	ENSG00000172236	16	1241251	1242516	+	TPSAB1-004	protein_coding	ENSG00000172236	TPSAB1	protein_coding	7177	E	ENST00000561736	-5.5617	1.50564	10.8489	0.00098857	0.0396221	-
ENST00000347055	ENSG00000172086	2	88027205	88055729	-	KRCC1-001	protein_coding	ENSG00000172086	KRCC1	protein_coding	51315	E	ENST00000347055	-5.27602	2.20388	10.8475	0.000989296	0.0396221	-
MSTRG.7409.20	NA	11	100936202	100993941	+	not_in_ref	not_in_ref	not_in_ref	not_in_ref	not_in_ref	no_EG	j	ENST00000298815	-8.01344	3.26301	10.8148	0.00100693	0.040282	-
MSTRG.13785.7	NA	15	84655129	84658095	-	not_in_ref	not_in_ref	not_in_ref	not_in_ref	not_in_ref	no_EG	j	ENST00000394588	-6.89968	3.44148	10.8034	0.00101313	0.0404832	-
ENST00000442215	ENSG00000163832	3	47495641	47513709	-	ELP6-003	nonsense_mediated_decay	ENSG00000163832	ELP6	protein_coding	54859	E	ENST00000442215	-5.01057	0.645662	10.795	0.00101777	0.0406218	-
ENST00000347587	ENSG00000128918	15	57953431	58065738	-	ALDH1A2-002	protein_coding	ENSG00000128918	ALDH1A2	protein_coding	8854	E	ENST00000347587	-6.60263	-0.707724	10.7781	0.00102707	0.0409003	-
MSTRG.27948.20	NA	3	132680653	132688888	-	not_in_ref	not_in_ref	not_in_ref	not_in_ref	not_in_ref	no_EG	j	ENST00000471702	4.73417	2.06644	10.7781	0.0010271	0.0409003	-
ENST00000575318	ENSG00000120071	17	46029925	46172177	-	KANSL1-006	protein_coding	ENSG00000120071	KANSL1	protein_coding	284058	E	ENST00000575318	-2.76908	1.53957	10.7744	0.00102914	0.0409254	-
MSTRG.17668.2	NA	17	64506865	64537946	+	not_in_ref	not_in_ref	not_in_ref	not_in_ref	not_in_ref	no_EG	j	ENST00000556440	-4.2718	1.21096	10.7727	0.00103009	0.0409254	-
MSTRG.25255.1	NA	21	41461823	41464263	+	not_in_ref	not_in_ref	not_in_ref	not_in_ref	not_in_ref	no_EG	u	NA	-4.29048	-0.713505	10.7674	0.00103301	0.0409945	-
ENST00000377254	ENSG00000144115	2	88170295	88186636	+	THNSL2-201	protein_coding	ENSG00000144115	THNSL2	protein_coding	55258	E	ENST00000377254	3.97691	2.17536	10.7636	0.00103517	0.0410332	-
ENST00000297195	ENSG00000164638	7	5282969	5304060	+	SLC29A4-002	protein_coding	ENSG00000164638	SLC29A4	protein_coding	222962	E	ENST00000297195	-7.17191	3.8041	10.7614	0.00103638	0.0410343	-
ENST00000427222	ENSG00000100239	22	50423605	50444371	+	PPP6R2-005	protein_coding	ENSG00000100239	PPP6R2	protein_coding	9701	noCuffcomp	noCuffcomp	0.798398	1.26727	10.7236	0.00105779	0.0418343	-
ENST00000547997	ENSG00000028203	12	95217761	95301172	+	VEZT-002	nonsense_mediated_decay	ENSG00000028203	VEZT	protein_coding	55591	E	ENST00000547997	-5.49121	3.3246	10.7204	0.0010596	0.0418586	-
MSTRG.39271.7	NA	9	91409045	91423356	-	not_in_ref	not_in_ref	not_in_ref	not_in_ref	not_in_ref	no_EG	j	ENST00000297689	-10.7451	3.12708	10.6845	0.00108037	0.0426305	-
ENST00000285381	ENSG00000164879	8	85438827	85449040	+	CA3-001	protein_coding	ENSG00000164879	CA3	protein_coding	761	E	ENST00000285381	-6.36983	9.05647	10.6687	0.00108964	0.0429475	-
ENST00000434821	ENSG00000115170	2	157736449	157875862	-	ACVR1-201	protein_coding	ENSG00000115170	ACVR1	protein_coding	90	E	ENST00000434821	-6.26399	1.87333	10.66	0.00109476	0.0431002	-
ENST00000411828	ENSG00000183527	21	39175588	39183287	-	PSMG1-005	nonsense_mediated_decay	ENSG00000183527	PSMG1	protein_coding	8624	E	ENST00000411828	-6.13869	0.552196	10.6507	0.00110026	0.0432679	-
ENST00000583590	ENSG00000198231	17	63773884	63819317	+	DDX42-002	protein_coding	ENSG00000198231	DDX42	protein_coding	11325	E	ENST00000583590	-7.72135	1.22207	10.634	0.00111029	0.0435878	-
ENST00000437389	ENSG00000229694	9	91170669	91182717	+	RP11-305L7.6-003	lincRNA	ENSG00000229694	RP11-305L7.6	lincRNA	NA	E	ENST00000437389	3.58535	-0.114365	10.6329	0.00111091	0.0435878	-
ENST00000379573	ENSG00000125843	20	3820531	3825302	+	AP5S1-003	protein_coding	ENSG00000125843	AP5S1	protein_coding	55317	E	ENST00000379573	-6.78513	-0.904668	10.63	0.00111265	0.0436069	-
MSTRG.11856.14	NA	14	73852072	73932247	+	not_in_ref	not_in_ref	not_in_ref	not_in_ref	not_in_ref	no_EG	j	ENST00000556551	-4.67529	0.708629	10.6248	0.0011158	0.0436808	-
MSTRG.39016.16	NA	9	63127264	63161203	+	not_in_ref	not_in_ref	not_in_ref	not_in_ref	not_in_ref	no_EG	j	ENST00000447083	-6.56003	0.675009	10.5717	0.0011483	0.0449026	-
MSTRG.32601.3	NA	5	180829937	180831535	-	not_in_ref	not_in_ref	not_in_ref	not_in_ref	not_in_ref	no_EG	o	ENST00000623091	3.30215	1.52007	10.5638	0.00115323	0.0450447	-
ENST00000412309	ENSG00000110077	11	60172497	60183223	-	MS4A6A-006	protein_coding	ENSG00000110077	MS4A6A	protein_coding	64231	noCuffcomp	noCuffcomp	-6.02975	0.10001	10.5605	0.00115529	0.045058	-
MSTRG.15412.6	NA	16	71846069	71930639	+	not_in_ref	not_in_ref	not_in_ref	not_in_ref	not_in_ref	no_EG	j	ENST00000544564	0.52398	0.421334	10.5591	0.00115617	0.045058	-
ENST00000263636	ENSG00000054219	2	159803355	159904710	-	LY75-001	protein_coding	ENSG00000054219	LY75	protein_coding	4065	E	ENST00000263636	-6.18365	-0.0425392	10.5498	0.001162	0.0452328	-
ENST00000409780	ENSG00000153208	2	111898629	112029367	+	MERTK-002	protein_coding	ENSG00000153208	MERTK	protein_coding	10461	E	ENST00000409780	-8.96707	-0.418564	10.5478	0.00116325	0.0452328	-
ENST00000438257	ENSG00000211448	14	80197530	80211627	-	DIO2-002	protein_coding	ENSG00000211448	DIO2	protein_coding	1734	E	ENST00000438257	-10.0564	0.868934	10.5438	0.00116582	0.0452816	-
MSTRG.4191.6	NA	10	12167577	12189592	-	not_in_ref	not_in_ref	not_in_ref	not_in_ref	not_in_ref	no_EG	j	ENST00000378937	-8.25233	2.96766	10.5319	0.00117335	0.0455232	-
ENST00000543355	ENSG00000167272	12	120579154	120581381	-	POP5-006	processed_transcript	ENSG00000167272	POP5	protein_coding	51367	E	ENST00000543355	-4.29083	-1.96595	10.5159	0.00118352	0.0458667	-
ENST00000413984	ENSG00000167380	19	44165103	44175158	+	ZNF226-006	protein_coding	ENSG00000167380	ZNF226	protein_coding	7769	E	ENST00000413984	0.602282	-2.4773	10.5098	0.00118743	0.0459669	-
MSTRG.33314.6	NA	6	33572553	33580168	-	not_in_ref	not_in_ref	not_in_ref	not_in_ref	not_in_ref	no_EG	j	ENST00000442998	-4.30311	1.38252	10.5055	0.0011902	0.0460228	-
MSTRG.28678.2	NA	3	190305707	190322411	-	not_in_ref	not_in_ref	not_in_ref	not_in_ref	not_in_ref	no_EG	j	ENST00000295522	-6.05249	2.83223	10.5034	0.00119154	0.0460234	-
MSTRG.4576.5	NA	10	47210914	47228868	+	not_in_ref	not_in_ref	not_in_ref	not_in_ref	not_in_ref	no_EG	u	NA	4.38002	2.76592	10.5005	0.00119344	0.0460455	-
ENST00000494699	ENSG00000115694	2	241495046	241496538	-	STK25-032	retained_intron	ENSG00000115694	STK25	protein_coding	10494	E	ENST00000494699	2.53482	2.04195	10.4922	0.00119882	0.0461878	-
ENST00000370466	ENSG00000162645	1	89108000	89126114	-	GBP2-002	protein_coding	ENSG00000162645	GBP2	protein_coding	NA	E	ENST00000370466	-6.02951	5.80262	10.4907	0.00119979	0.0461878	-
ENST00000470588	ENSG00000082014	7	151239008	151241492	-	SMARCD3-007	retained_intron	ENSG00000082014	SMARCD3	protein_coding	6604	E	ENST00000470588	-4.0908	-0.531535	10.4632	0.00121777	0.046828	-
ENST00000444458	ENSG00000115355	2	55288088	55309207	-	CCDC88A-003	protein_coding	ENSG00000115355	CCDC88A	protein_coding	55704	E	ENST00000444458	4.59157	1.78278	10.4591	0.00122046	0.0468798	-
MSTRG.14634.1	NA	16	23061406	23108186	-	not_in_ref	not_in_ref	not_in_ref	not_in_ref	not_in_ref	no_EG	j	ENST00000219689	-10.6328	1.8165	10.4427	0.00123137	0.0472366	-
ENST00000377967	ENSG00000147050	X	44873511	45112602	+	KDM6A-001	protein_coding	ENSG00000147050	KDM6A	protein_coding	7403	E	ENST00000377967	-4.22741	0.923009	10.441	0.00123247	0.0472366	-
ENST00000320895	ENSG00000049656	5	1317744	1345099	-	CLPTM1L-001	protein_coding	ENSG00000049656	CLPTM1L	protein_coding	81037	E	ENST00000320895	-7.72752	0.554352	10.432	0.00123852	0.047375	-
ENST00000467196	ENSG00000101361	20	2655436	2658393	+	NOP56-007	nonsense_mediated_decay	ENSG00000101361	NOP56	protein_coding	10528	E	ENST00000467196	5.50253	2.03206	10.4291	0.00124047	0.047375	-
ENST00000555365	ENSG00000100445	14	24439902	24442765	-	SDR39U1-018	protein_coding	ENSG00000100445	SDR39U1	protein_coding	56948	E	ENST00000555365	-5.94625	1.53053	10.4291	0.00124048	0.047375	-
MSTRG.5486.1	NA	10	112149860	112215377	-	not_in_ref	not_in_ref	not_in_ref	not_in_ref	not_in_ref	no_EG	j	ENST00000348367	-6.74061	10.3035	10.4275	0.00124154	0.047375	-
ENST00000397910	ENSG00000181143	19	8848844	8981342	-	MUC16-001	protein_coding	ENSG00000181143	MUC16	protein_coding	94025	E	ENST00000397910	-4.03315	1.6415	10.4172	0.00124844	0.0475861	-
ENST00000396231	ENSG00000186976	22	43528744	43812190	-	EFCAB6-001	protein_coding	ENSG00000186976	EFCAB6	protein_coding	64800	E	ENST00000396231	-5.46567	-0.349503	10.4124	0.00125174	0.0476594	-
MSTRG.1926.13	NA	1	109656721	109661700	+	not_in_ref	not_in_ref	not_in_ref	not_in_ref	not_in_ref	no_EG	j	ENST00000369836	-7.11324	1.80214	10.4078	0.00125481	0.0477242	-
ENST00000623080	ENSG00000279423	14	34541044	34541714	+	RP11-671J11.5-001	TEC	ENSG00000279423	RP11-671J11.5	TEC	NA	E	ENST00000623080	2.94168	1.668	10.4055	0.00125641	0.0477328	-
MSTRG.19291.15	NA	19	10777169	10831897	+	not_in_ref	not_in_ref	not_in_ref	not_in_ref	not_in_ref	no_EG	j	ENST00000389253	-8.76322	3.76344	10.4001	0.00126009	0.0478201	-
ENST00000588281	ENSG00000087157	17	78399289	78424557	+	PGS1-007	processed_transcript	ENSG00000087157	PGS1	protein_coding	9489	E	ENST00000588281	3.33691	1.03595	10.3933	0.00126475	0.0479446	-
ENST00000622299	ENSG00000214087	17	81681187	81683763	-	ARL16-014	protein_coding	ENSG00000214087	ARL16	protein_coding	339231	noCuffcomp	noCuffcomp	-7.56875	2.15453	10.365	0.00128429	0.0486321	-
ENST00000515055	ENSG00000250135	1	32170733	32176568	+	RP4-622L5.2-001	sense_intronic	ENSG00000250135	RP4-622L5.2	sense_intronic	NA	E	ENST00000515055	3.69123	1.18856	10.354	0.00129191	0.0488674	-
MSTRG.23521.3	NA	2	210187939	210224849	-	not_in_ref	not_in_ref	not_in_ref	not_in_ref	not_in_ref	no_EG	j	ENST00000233710	-6.34119	0.854029	10.3396	0.00130205	0.0491973	-
ENST00000404760	ENSG00000100425	22	49773283	49827512	-	BRD1-003	protein_coding	ENSG00000100425	BRD1	protein_coding	23774	E	ENST00000404760	-14.1479	1.18414	10.3346	0.00130556	0.0492765	-
ENST00000613549	ENSG00000272636	17	142789	181636	-	DOC2B-001	protein_coding	ENSG00000272636	DOC2B	protein_coding	NA	E	ENST00000613549	-4.46575	-0.301172	10.3312	0.00130798	0.0493139	-
ENST00000586868	ENSG00000105254	19	36116072	36125947	+	TBCB-005	protein_coding	ENSG00000105254	TBCB	protein_coding	1155	noCuffcomp	noCuffcomp	3.97753	0.537064	10.3161	0.00131875	0.0496663	-
ENST00000621247	ENSG00000105672	19	35642139	35644871	+	ETV2-203	protein_coding	ENSG00000105672	ETV2	protein_coding	2116	E	ENST00000621247	1.86174	-1.47684	10.3122	0.00132156	0.049718	-
ENST00000308344	ENSG00000106404	7	101232092	101237946	-	CLDN15-002	protein_coding	ENSG00000106404	CLDN15	protein_coding	24146	E	ENST00000308344	-5.49348	2.2892	10.3086	0.00132409	0.0497593	-

## Sheet: ObCRC_NwCRC
Supplementary Data 2: Differential expression of adipocyte transcripts in lean and obese subjects affected by CRC, by RNASeq analysis.
TranscriptRecID	GeneID	Chr	Start	Stop	Strand	TranscriptName	TranscriptType	EnsG	GeneSymbol	GeneType	EntrezGeneID	cffmpType	cffmpNearestTranscript	logFC	logCPM	LR	PValue	FDR	-
ENST00000336126	ENSG00000180628	10	91220788	91284331	+	PCGF5-001	protein_coding	ENSG00000180628	PCGF5	protein_coding	84333	E	ENST00000336126	76.9457	3.40547	67.716	1.88827e-16	6.55684e-12	-
MSTRG.29367.2	NA	4	55427972	55510066	-	not_in_ref	not_in_ref	not_in_ref	not_in_ref	not_in_ref	no_EG	j	ENST00000381322	-18.5898	2.54512	61.2103	5.12915e-15	8.90523e-11	-
MSTRG.29758.20	NA	4	99336492	99352730	-	not_in_ref	not_in_ref	not_in_ref	not_in_ref	not_in_ref	no_EG	j	ENST00000515683	42.465	1.82355	60.0116	9.43017e-15	1.09151e-10	-
MSTRG.25985.6	NA	22	38219316	38247997	-	not_in_ref	not_in_ref	not_in_ref	not_in_ref	not_in_ref	no_EG	j	ENST00000436674	-26.3959	3.03608	58.635	1.89805e-14	1.6477e-10	-
ENST00000295802	ENSG00000042445	2	85342088	85354620	-	RETSAT-001	protein_coding	ENSG00000042445	RETSAT	protein_coding	54884	E	ENST00000295802	-13.2965	2.87413	56.4449	5.77945e-14	4.01371e-10	-
ENST00000327237	ENSG00000140688	16	31489489	31508413	-	C16orf58-001	protein_coding	ENSG00000140688	C16orf58	protein_coding	64755	E	ENST00000327237	18.3232	2.18694	54.9389	1.24339e-13	7.19589e-10	-
MSTRG.15921.2	NA	17	4163843	4260347	-	not_in_ref	not_in_ref	not_in_ref	not_in_ref	not_in_ref	no_EG	j	ENST00000341657	31.5963	2.80803	54.2119	1.7999e-13	8.5633e-10	-
MSTRG.26282.10	NA	22	50446826	50474942	-	not_in_ref	not_in_ref	not_in_ref	not_in_ref	not_in_ref	no_EG	j	ENST00000380817	15.8031	3.66145	54.0316	1.97288e-13	8.5633e-10	-
ENST00000367857	ENSG00000118515	6	134169353	134174865	-	SGK1-011	protein_coding	ENSG00000118515	SGK1	protein_coding	6446	E	ENST00000367857	36.422	0.635145	50.6858	1.08399e-12	4.18226e-09	-
MSTRG.39832.3	NA	9	127815017	127824405	-	not_in_ref	not_in_ref	not_in_ref	not_in_ref	not_in_ref	no_EG	j	ENST00000373203	6.56083	1.50005	49.6207	1.86531e-12	6.4771e-09	-
ENST00000292530	ENSG00000160961	19	14690101	14721908	+	ZNF333-001	protein_coding	ENSG00000160961	ZNF333	protein_coding	84449	E	ENST00000292530	30.4418	0.618984	49.3559	2.13495e-12	6.73945e-09	-
MSTRG.32760.7	NA	6	8413068	8435434	-	not_in_ref	not_in_ref	not_in_ref	not_in_ref	not_in_ref	no_EG	j	ENST00000379660	26.4612	1.83829	48.9407	2.63817e-12	7.63398e-09	-
MSTRG.15829.4	NA	17	1830064	1898004	+	not_in_ref	not_in_ref	not_in_ref	not_in_ref	not_in_ref	no_EG	j	ENST00000254719	14.1986	0.549692	48.1024	4.04541e-12	1.08056e-08	-
MSTRG.25253.11	NA	21	41370514	41408943	+	not_in_ref	not_in_ref	not_in_ref	not_in_ref	not_in_ref	no_EG	j	ENST00000330714	47.8439	-1.8307	47.5139	5.46145e-12	1.3546e-08	-
MSTRG.10047.177	NA	12	124911704	124915229	-	not_in_ref	not_in_ref	not_in_ref	not_in_ref	not_in_ref	no_EG	j	ENST00000538617	22.1518	2.87563	46.2932	1.01817e-11	2.09653e-08	-
MSTRG.22737.10	NA	2	135531546	135725271	+	not_in_ref	not_in_ref	not_in_ref	not_in_ref	not_in_ref	no_EG	j	ENST00000264160	14.3785	1.97847	46.2037	1.06575e-11	2.09653e-08	-
ENST00000474486	ENSG00000158882	1	161226060	161230615	+	TOMM40L-003	processed_transcript	ENSG00000158882	TOMM40L	protein_coding	84134	E	ENST00000474486	-12.2993	1.48425	46.0386	1.15948e-11	2.09653e-08	-
ENST00000355431	ENSG00000032219	14	58298385	58373733	+	ARID4A-001	protein_coding	ENSG00000032219	ARID4A	protein_coding	5926	E	ENST00000355431	40.5227	0.770848	46.0347	1.16174e-11	2.09653e-08	-
ENST00000617005	ENSG00000182621	20	8628288	8884896	+	PLCB1-202	protein_coding	ENSG00000182621	PLCB1	protein_coding	23236	E	ENST00000617005	22.1458	0.0520365	46.0233	1.16855e-11	2.09653e-08	-
MSTRG.35180.12	NA	7	35832798	35905305	+	not_in_ref	not_in_ref	not_in_ref	not_in_ref	not_in_ref	no_EG	j	ENST00000350320	-13.6581	3.08319	45.959	1.20754e-11	2.09653e-08	-
MSTRG.2791.27	NA	1	160217347	160262407	-	not_in_ref	not_in_ref	not_in_ref	not_in_ref	not_in_ref	no_EG	j	ENST00000556710	14.2891	0.26418	45.4717	1.54864e-11	2.56071e-08	-
ENST00000609540	ENSG00000170222	17	10704900	10711230	+	ADPRM-004	protein_coding	ENSG00000170222	ADPRM	protein_coding	NA	E	ENST00000609540	-11.7329	1.29114	44.8165	2.16394e-11	3.41549e-08	-
ENST00000589970	ENSG00000105341	19	41431872	41439908	-	ATP5SL-008	protein_coding	ENSG00000105341	ATP5SL	protein_coding	55101	E	ENST00000589970	46.406	-0.638246	44.0811	3.15049e-11	4.75642e-08	-
MSTRG.27945.25	NA	3	133574583	133590259	+	not_in_ref	not_in_ref	not_in_ref	not_in_ref	not_in_ref	no_EG	j	ENST00000420115	17.9839	4.63888	43.6683	3.89014e-11	5.62838e-08	-
MSTRG.26837.6	NA	3	44338223	44409445	+	not_in_ref	not_in_ref	not_in_ref	not_in_ref	not_in_ref	no_EG	j	ENST00000342649	14.4446	0.902397	43.0042	5.46226e-11	7.58686e-08	-
MSTRG.13436.4	NA	15	67201707	67254453	-	not_in_ref	not_in_ref	not_in_ref	not_in_ref	not_in_ref	no_EG	j	ENST00000261880	13.9644	0.122993	42.2931	7.85677e-11	1.0493e-07	-
ENST00000309190	ENSG00000153113	5	96702801	96774683	+	CAST-003	protein_coding	ENSG00000153113	CAST	protein_coding	831	E	ENST00000309190	15.6419	5.35563	41.7632	1.03026e-10	1.32499e-07	-
MSTRG.26498.7	NA	3	15206336	15252302	+	not_in_ref	not_in_ref	not_in_ref	not_in_ref	not_in_ref	no_EG	j	ENST00000253693	16.4935	3.16594	41.384	1.25074e-10	1.5511e-07	-
ENST00000534799	ENSG00000188599	16	15104312	15121902	-	NPIPP1-001	processed_transcript	ENSG00000188599	NPIPP1	transcribed_unprocessed_pseudogene	NA	E	ENST00000534799	11.2589	0.276802	41.2057	1.37025e-10	1.6407e-07	-
MSTRG.15104.12	NA	16	55803049	55828976	-	not_in_ref	not_in_ref	not_in_ref	not_in_ref	not_in_ref	no_EG	j	ENST00000422046	37.0006	4.76217	41.0122	1.5128e-10	1.75102e-07	-
MSTRG.26791.1	NA	3	41225538	41962430	-	not_in_ref	not_in_ref	not_in_ref	not_in_ref	not_in_ref	no_EG	j	ENST00000301831	-12.118	-0.76998	40.9049	1.59822e-10	1.79021e-07	-
ENST00000262367	ENSG00000005339	16	3725054	3880726	-	CREBBP-001	protein_coding	ENSG00000005339	CREBBP	protein_coding	1387	E	ENST00000262367	-10.9354	2.55854	40.666	1.80606e-10	1.9598e-07	-
ENST00000423565	ENSG00000105875	7	135183839	135210899	-	WDR91-002	protein_coding	ENSG00000105875	WDR91	protein_coding	29062	E	ENST00000423565	-11.1462	0.580947	40.2668	2.21545e-10	2.33119e-07	-
MSTRG.38092.4	NA	8	115408681	115429311	-	not_in_ref	not_in_ref	not_in_ref	not_in_ref	not_in_ref	no_EG	j	ENST00000395715	-9.70925	2.13497	39.0446	4.14225e-10	4.23046e-07	-
ENST00000546267	ENSG00000233024	16	18361225	18379331	-	RP11-1212A22.4-007	processed_transcript	ENSG00000233024	RP11-1212A22.4	protein_coding	NA	noCuffcomp	noCuffcomp	-9.25727	2.08135	38.7559	4.80248e-10	4.76461e-07	-
ENST00000373941	ENSG00000088367	20	36173769	36229340	+	EPB41L1-011	protein_coding	ENSG00000088367	EPB41L1	protein_coding	2036	noCuffcomp	noCuffcomp	6.07976	0.181141	38.3625	5.87492e-10	5.66668e-07	-
ENST00000409644	ENSG00000167716	17	1724960	1738592	+	WDR81-001	protein_coding	ENSG00000167716	WDR81	protein_coding	124997	E	ENST00000409644	14.6038	2.82898	38.1067	6.69798e-10	6.28596e-07	-
ENST00000442069	ENSG00000277631	9	72705	75327	+	PGM5P3-AS1-003	lincRNA	ENSG00000277631	PGM5P3-AS1	lincRNA	NA	E	ENST00000442069	11.924	-1.04721	37.8096	7.79953e-10	7.12713e-07	-
MSTRG.33571.13	NA	6	44254206	44256873	-	not_in_ref	not_in_ref	not_in_ref	not_in_ref	not_in_ref	no_EG	j	ENST00000619636	-10.1553	1.94228	37.7266	8.13868e-10	7.24635e-07	-
MSTRG.37292.6	NA	8	31093059	31173686	+	not_in_ref	not_in_ref	not_in_ref	not_in_ref	not_in_ref	no_EG	j	ENST00000298139	-12.4663	0.741323	37.6312	8.54673e-10	7.41942e-07	-
MSTRG.27103.1	NA	3	52903435	53046663	-	not_in_ref	not_in_ref	not_in_ref	not_in_ref	not_in_ref	no_EG	j	ENST00000394752	13.3693	0.232146	36.6232	1.43313e-09	1.21375e-06	-
ENST00000486368	ENSG00000105221	19	40242040	40280832	-	AKT2-033	protein_coding	ENSG00000105221	AKT2	protein_coding	208	noCuffcomp	noCuffcomp	31.4731	0.223214	36.2678	1.71985e-09	1.42191e-06	-
MSTRG.13785.7	NA	15	84655129	84658095	-	not_in_ref	not_in_ref	not_in_ref	not_in_ref	not_in_ref	no_EG	j	ENST00000394588	30.4224	3.30074	36.1465	1.83029e-09	1.47802e-06	-
MSTRG.27929.7	NA	3	130850756	131016684	+	not_in_ref	not_in_ref	not_in_ref	not_in_ref	not_in_ref	no_EG	j	ENST00000510168	11.3278	2.66639	35.9807	1.99282e-09	1.57269e-06	-
ENST00000394153	ENSG00000022267	X	136169637	136211359	+	FHL1-201	protein_coding	ENSG00000022267	FHL1	protein_coding	2273	E	ENST00000394153	20.6474	4.48728	35.7982	2.18846e-09	1.68871e-06	-
ENST00000404760	ENSG00000100425	22	49773283	49827512	-	BRD1-003	protein_coding	ENSG00000100425	BRD1	protein_coding	23774	E	ENST00000404760	13.5333	1.60561	35.7004	2.3012e-09	1.7371e-06	-
ENST00000346528	ENSG00000100461	14	22900777	22919178	-	RBM23-003	protein_coding	ENSG00000100461	RBM23	protein_coding	55147	E	ENST00000346528	14.856	1.99627	35.4484	2.61893e-09	1.93488e-06	-
ENST00000548033	ENSG00000004455	1	33010478	33036840	-	AK2-010	protein_coding	ENSG00000004455	AK2	protein_coding	204	E	ENST00000548033	15.6083	-0.714162	35.2007	2.97413e-09	2.15154e-06	-
MSTRG.35940.8	NA	7	100051521	100065040	+	not_in_ref	not_in_ref	not_in_ref	not_in_ref	not_in_ref	no_EG	j	ENST00000456748	13.154	-0.282955	35.1226	3.0959e-09	2.19392e-06	-
MSTRG.25985.4	NA	22	38219296	38272931	-	not_in_ref	not_in_ref	not_in_ref	not_in_ref	not_in_ref	no_EG	j	ENST00000436674	12.4443	3.31471	35.0712	3.17863e-09	2.20749e-06	-
MSTRG.33848.7	NA	6	87596855	87667486	+	not_in_ref	not_in_ref	not_in_ref	not_in_ref	not_in_ref	no_EG	j	ENST00000392844	-9.14272	1.79239	34.9015	3.46819e-09	2.36136e-06	-
ENST00000453153	ENSG00000138399	2	169529749	169573873	-	FASTKD1-001	protein_coding	ENSG00000138399	FASTKD1	protein_coding	79675	E	ENST00000453153	-10.5452	0.645632	34.798	3.65744e-09	2.44233e-06	-
MSTRG.26916.11	NA	3	47016689	47163859	-	not_in_ref	not_in_ref	not_in_ref	not_in_ref	not_in_ref	no_EG	j	ENST00000409792	13.7641	2.56842	34.6227	4.00215e-09	2.62209e-06	-
ENST00000393910	ENSG00000141698	17	41825238	41836197	-	NT5C3B-015	retained_intron	ENSG00000141698	NT5C3B	protein_coding	NA	E	ENST00000393910	17.129	1.14505	34.3447	4.61664e-09	2.96867e-06	-
ENST00000302787	ENSG00000168924	4	1811479	1856247	-	LETM1-001	protein_coding	ENSG00000168924	LETM1	protein_coding	3954	E	ENST00000302787	16.1749	1.87325	34.2525	4.84049e-09	3.05602e-06	-
MSTRG.31324.2	NA	5	79236244	79327194	+	not_in_ref	not_in_ref	not_in_ref	not_in_ref	not_in_ref	no_EG	j	ENST00000396137	13.3419	1.32551	33.9361	5.69526e-09	3.53147e-06	-
MSTRG.4954.9	NA	10	75123861	75182128	+	not_in_ref	not_in_ref	not_in_ref	not_in_ref	not_in_ref	no_EG	j	ENST00000542569	-14.0118	5.4646	33.7546	6.2521e-09	3.80873e-06	-
ENST00000612200	ENSG00000176946	2	241584428	241633364	-	THAP4-201	protein_coding	ENSG00000176946	THAP4	protein_coding	51078	noCuffcomp	noCuffcomp	-11.4906	0.910724	33.5591	6.91301e-09	4.13875e-06	-
ENST00000394110	ENSG00000112640	6	42984553	43012342	+	PPP2R5D-004	protein_coding	ENSG00000112640	PPP2R5D	protein_coding	5528	E	ENST00000394110	-8.80603	1.73868	33.4184	7.43163e-09	4.33132e-06	-
ENST00000438792	ENSG00000126777	14	55580315	55684579	+	KTN1-004	protein_coding	ENSG00000126777	KTN1	protein_coding	3895	E	ENST00000438792	13.7135	4.6132	33.4047	7.48414e-09	4.33132e-06	-
MSTRG.10795.2	NA	13	106543473	106568164	-	not_in_ref	not_in_ref	not_in_ref	not_in_ref	not_in_ref	no_EG	j	ENST00000375926	19.8984	2.46514	33.3459	7.71419e-09	4.39127e-06	-
MSTRG.22077.1	NA	2	86503430	86623028	-	not_in_ref	not_in_ref	not_in_ref	not_in_ref	not_in_ref	no_EG	j	ENST00000604011	9.19417	0.713314	32.889	9.75741e-09	5.46478e-06	-
ENST00000406341	ENSG00000168137	3	9397904	9478154	+	SETD5-001	protein_coding	ENSG00000168137	SETD5	protein_coding	55209	E	ENST00000406341	14.4691	2.3891	32.5543	1.15908e-08	6.38857e-06	-
ENST00000265080	ENSG00000113319	5	80960672	81230156	+	RASGRF2-001	protein_coding	ENSG00000113319	RASGRF2	protein_coding	5924	E	ENST00000265080	12.8105	3.14849	32.4612	1.21597e-08	6.59739e-06	-
MSTRG.21324.7	NA	2	27653052	27663590	-	not_in_ref	not_in_ref	not_in_ref	not_in_ref	not_in_ref	no_EG	j	ENST00000337768	10.517	-0.4835	32.3898	1.26146e-08	6.73894e-06	-
ENST00000446197	ENSG00000100897	14	24114780	24125240	+	DCAF11-001	protein_coding	ENSG00000100897	DCAF11	protein_coding	80344	E	ENST00000446197	-11.2028	1.92095	32.3497	1.28776e-08	6.77518e-06	-
ENST00000371153	ENSG00000132854	1	62236979	62319414	-	KANK4-001	protein_coding	ENSG00000132854	KANK4	protein_coding	163782	E	ENST00000371153	12.0602	1.61028	32.3201	1.30751e-08	6.77643e-06	-
MSTRG.12387.9	NA	15	22838689	22868382	+	not_in_ref	not_in_ref	not_in_ref	not_in_ref	not_in_ref	no_EG	j	ENST00000337451	18.1774	-0.591091	32.2899	1.32803e-08	6.78152e-06	-
ENST00000490035	ENSG00000185565	3	115802388	116445531	-	LSAMP-001	protein_coding	ENSG00000185565	LSAMP	protein_coding	4045	E	ENST00000490035	18.0977	0.633814	32.0536	1.49974e-08	7.54738e-06	-
MSTRG.29209.1	NA	4	39287382	39355923	-	not_in_ref	not_in_ref	not_in_ref	not_in_ref	not_in_ref	no_EG	j	ENST00000381897	12.6743	2.64965	31.7959	1.71256e-08	8.49527e-06	-
ENST00000610139	ENSG00000132716	1	160239222	160262425	-	DCAF8-018	protein_coding	ENSG00000132716	DCAF8	protein_coding	50717	E	ENST00000610139	-12.921	0.316986	31.6273	1.86785e-08	9.1351e-06	-
ENST00000586746	ENSG00000099817	19	1086579	1095354	-	POLR2E-010	protein_coding	ENSG00000099817	POLR2E	protein_coding	5434	E	ENST00000586746	18.1307	1.73942	31.5144	1.97966e-08	9.54744e-06	-
ENST00000287936	ENSG00000113161	5	75337168	75362104	+	HMGCR-001	protein_coding	ENSG00000113161	HMGCR	protein_coding	3156	E	ENST00000287936	11.3685	0.816906	31.4287	2.06896e-08	9.84147e-06	-
MSTRG.38553.18	NA	9	684342	746104	+	not_in_ref	not_in_ref	not_in_ref	not_in_ref	not_in_ref	no_EG	j	ENST00000382303	11.9887	2.80676	31.0861	2.46832e-08	1.15824e-05	-
ENST00000619501	ENSG00000266714	17	75588058	75620523	+	MYO15B-034	processed_transcript	ENSG00000266714	MYO15B	transcribed_unprocessed_pseudogene	80022	noCuffcomp	noCuffcomp	17.1086	0.128197	31.0268	2.54491e-08	1.17826e-05	-
ENST00000416718	ENSG00000198744	1	634376	634922	+	RP5-857K21.11-001	unprocessed_pseudogene	ENSG00000198744	RP5-857K21.11	unprocessed_pseudogene	NA	E	ENST00000416718	-6.84857	5.08085	30.863	2.76896e-08	1.26512e-05	-
ENST00000507661	ENSG00000071205	4	147881867	148072775	+	ARHGAP10-004	protein_coding	ENSG00000071205	ARHGAP10	protein_coding	79658	E	ENST00000507661	12.024	1.77581	30.6313	3.12017e-08	1.4028e-05	-
MSTRG.3661.16	NA	1	222715104	222735196	+	not_in_ref	not_in_ref	not_in_ref	not_in_ref	not_in_ref	no_EG	j	ENST00000340934	12.4281	1.1102	30.6122	3.1511e-08	1.4028e-05	-
ENST00000343028	ENSG00000064115	12	26973195	27014394	-	TM7SF3-001	protein_coding	ENSG00000064115	TM7SF3	protein_coding	NA	E	ENST00000343028	19.1958	1.68564	30.4529	3.42075e-08	1.4986e-05	-
ENST00000503292	ENSG00000048342	4	15469930	15601557	+	CC2D2A-002	protein_coding	ENSG00000048342	CC2D2A	protein_coding	57545	E	ENST00000503292	16.0424	0.431762	30.4322	3.45743e-08	1.4986e-05	-
ENST00000368704	ENSG00000188643	1	153606886	153609337	-	S100A16-008	protein_coding	ENSG00000188643	S100A16	protein_coding	140576	E	ENST00000368704	12.2882	0.725871	30.4108	3.49576e-08	1.4986e-05	-
MSTRG.30184.7	NA	4	122196668	122362707	+	not_in_ref	not_in_ref	not_in_ref	not_in_ref	not_in_ref	no_EG	j	ENST00000264501	11.4202	1.97686	30.3261	3.6518e-08	1.53221e-05	-
MSTRG.21538.6	NA	2	44317938	44359749	-	not_in_ref	not_in_ref	not_in_ref	not_in_ref	not_in_ref	no_EG	j	ENST00000426481	22.1585	0.504186	30.3205	3.66241e-08	1.53221e-05	-
ENST00000369047	ENSG00000143369	1	150508085	150513789	+	ECM1-011	protein_coding	ENSG00000143369	ECM1	protein_coding	1893	E	ENST00000369047	11.741	-0.00451354	30.1009	4.10131e-08	1.689e-05	-
MSTRG.18036.12	NA	17	81843961	81860478	-	not_in_ref	not_in_ref	not_in_ref	not_in_ref	not_in_ref	no_EG	j	ENST00000331483	12.2645	3.93004	30.0853	4.13447e-08	1.689e-05	-
MSTRG.31057.15	NA	5	57214121	57263082	+	not_in_ref	not_in_ref	not_in_ref	not_in_ref	not_in_ref	no_EG	j	ENST00000424459	11.7514	2.373	29.9666	4.3956e-08	1.7748e-05	-
MSTRG.12868.1	NA	15	40405795	40421342	+	not_in_ref	not_in_ref	not_in_ref	not_in_ref	not_in_ref	no_EG	j	ENST00000487418	13.0182	2.00597	29.8663	4.62877e-08	1.84747e-05	-
MSTRG.23998.131	NA	2	241560169	241574106	+	not_in_ref	not_in_ref	not_in_ref	not_in_ref	not_in_ref	no_EG	j	ENST00000318407	12.5058	4.3149	29.6689	5.12494e-08	2.02225e-05	-
ENST00000268314	ENSG00000140691	16	31458996	31467164	+	ARMC5-201	protein_coding	ENSG00000140691	ARMC5	protein_coding	79798	E	ENST00000268314	12.3105	0.911506	29.5596	5.42225e-08	2.11553e-05	-
MSTRG.40366.2	NA	X	15384799	15492200	-	not_in_ref	not_in_ref	not_in_ref	not_in_ref	not_in_ref	no_EG	j	ENST00000380421	-10.1209	2.72823	29.5202	5.53381e-08	2.13507e-05	-
ENST00000567607	ENSG00000140682	16	31473426	31477958	+	TGFB1I1-004	protein_coding	ENSG00000140682	TGFB1I1	protein_coding	7041	E	ENST00000567607	11.5558	2.00277	29.3521	6.035e-08	2.30285e-05	-
MSTRG.24108.2	NA	20	5544439	5610924	-	not_in_ref	not_in_ref	not_in_ref	not_in_ref	not_in_ref	no_EG	j	ENST00000379019	12.0141	2.40034	29.2917	6.22608e-08	2.34994e-05	-
ENST00000456917	ENSG00000234883	21	25561909	25575168	+	MIR155HG-001	lincRNA	ENSG00000234883	MIR155HG	lincRNA	114614	E	ENST00000456917	12.3579	0.412527	29.2698	6.29698e-08	2.35114e-05	-
MSTRG.19649.26	NA	19	18990894	19031030	-	not_in_ref	not_in_ref	not_in_ref	not_in_ref	not_in_ref	no_EG	j	ENST00000330854	-12.5807	1.92088	29.2241	6.44708e-08	2.38043e-05	-
MSTRG.17561.2	NA	17	62627685	62693553	+	not_in_ref	not_in_ref	not_in_ref	not_in_ref	not_in_ref	no_EG	j	ENST00000303375	12.0047	1.19551	29.2046	6.51251e-08	2.38043e-05	-
ENST00000259241	ENSG00000136720	2	128265480	128318577	-	HS6ST1-001	protein_coding	ENSG00000136720	HS6ST1	protein_coding	9394	E	ENST00000259241	11.3547	1.5026	28.8526	7.81008e-08	2.82497e-05	-
ENST00000375964	ENSG00000204463	6	31639029	31652700	-	BAG6-204	protein_coding	ENSG00000204463	BAG6	protein_coding	7917	E	ENST00000375964	13.722	2.21737	28.79	8.06658e-08	2.88767e-05	-
ENST00000429801	ENSG00000110713	11	3675878	3706535	-	NUP98-003	protein_coding	ENSG00000110713	NUP98	protein_coding	4928	E	ENST00000429801	-13.6231	1.24691	28.7083	8.4144e-08	2.98144e-05	-
MSTRG.24466.9	NA	20	36251705	36256929	+	not_in_ref	not_in_ref	not_in_ref	not_in_ref	not_in_ref	no_EG	j	ENST00000373932	12.1521	2.17666	28.6798	8.53881e-08	2.99497e-05	-
ENST00000443035	ENSG00000174485	15	65659123	65792124	-	DENND4A-001	protein_coding	ENSG00000174485	DENND4A	protein_coding	10260	E	ENST00000443035	-13.3135	3.24671	28.6037	8.88107e-08	3.05753e-05	-
MSTRG.28867.2	NA	4	849277	932220	-	not_in_ref	not_in_ref	not_in_ref	not_in_ref	not_in_ref	no_EG	j	ENST00000314167	-14.3041	1.49462	28.5985	8.90497e-08	3.05753e-05	-
ENST00000265149	ENSG00000168769	4	105146786	105279803	+	TET2-005	nonsense_mediated_decay	ENSG00000168769	TET2	protein_coding	54790	E	ENST00000265149	11.7091	2.39804	28.582	8.98133e-08	3.05753e-05	-
ENST00000396825	ENSG00000197296	20	44302838	44311169	-	FITM2-001	protein_coding	ENSG00000197296	FITM2	protein_coding	NA	E	ENST00000396825	11.7409	3.82254	28.2311	1.0766e-07	3.60679e-05	-
MSTRG.26170.5	NA	22	45134290	45163659	-	not_in_ref	not_in_ref	not_in_ref	not_in_ref	not_in_ref	no_EG	j	ENST00000426282	14.0095	-0.21503	28.2246	1.08025e-07	3.60679e-05	-
MSTRG.20514.11	NA	19	49807056	49813241	-	not_in_ref	not_in_ref	not_in_ref	not_in_ref	not_in_ref	no_EG	j	ENST00000313777	15.4569	1.25821	28.2009	1.09353e-07	3.61636e-05	-
MSTRG.13569.11	NA	15	74899994	74906880	-	not_in_ref	not_in_ref	not_in_ref	not_in_ref	not_in_ref	no_EG	j	ENST00000563671	10.6375	0.979298	27.8021	1.34381e-07	4.40211e-05	-
ENST00000470654	ENSG00000138434	2	181898859	181901974	+	SSFA2-015	retained_intron	ENSG00000138434	SSFA2	protein_coding	6744	E	ENST00000470654	-8.39304	-0.926087	27.7449	1.38413e-07	4.49182e-05	-
ENST00000375425	ENSG00000204356	6	31952229	31958852	-	NELFE-013	protein_coding	ENSG00000204356	NELFE	protein_coding	7936	E	ENST00000375425	16.9586	1.55121	27.702	1.41514e-07	4.54995e-05	-
MSTRG.33216.21	NA	6	31815672	31822255	+	not_in_ref	not_in_ref	not_in_ref	not_in_ref	not_in_ref	no_EG	o	ENST00000608703	10.9706	6.27289	27.6056	1.4875e-07	4.7387e-05	-
MSTRG.40790.6	NA	X	54932916	54998748	-	not_in_ref	not_in_ref	not_in_ref	not_in_ref	not_in_ref	no_EG	j	ENST00000375006	11.0729	-1.82009	27.508	1.56445e-07	4.93853e-05	-
ENST00000371065	ENSG00000213625	1	65420587	65436007	+	LEPROT-001	protein_coding	ENSG00000213625	LEPROT	protein_coding	54741	E	ENST00000371065	13.506	4.59228	27.4859	1.5824e-07	4.95021e-05	-
ENST00000487932	ENSG00000008710	16	2090985	2109853	-	PKD1-007	nonsense_mediated_decay	ENSG00000008710	PKD1	protein_coding	5310	E	ENST00000487932	9.8754	1.6187	27.4496	1.61243e-07	4.99912e-05	-
ENST00000269080	ENSG00000141338	17	68867292	68955351	-	ABCA8-001	protein_coding	ENSG00000141338	ABCA8	protein_coding	10351	E	ENST00000269080	13.741	5.38955	27.1461	1.88646e-07	5.79693e-05	-
ENST00000395528	ENSG00000172901	5	115962494	116027601	+	AQPEP-201	protein_coding	ENSG00000172901	AQPEP	protein_coding	206338	E	ENST00000395528	11.1291	2.55066	27.0044	2.02991e-07	6.18304e-05	-
ENST00000378073	ENSG00000105429	19	42325609	42378769	+	MEGF8-201	protein_coding	ENSG00000105429	MEGF8	protein_coding	1954	E	ENST00000378073	10.9109	1.49411	26.9748	2.06122e-07	6.2238e-05	-
ENST00000272065	ENSG00000143727	2	264872	278283	+	ACP1-001	protein_coding	ENSG00000143727	ACP1	protein_coding	52	E	ENST00000272065	11.1427	2.72352	26.9422	2.09627e-07	6.27507e-05	-
ENST00000361842	ENSG00000132530	17	6755840	6775647	+	XAF1-001	protein_coding	ENSG00000132530	XAF1	protein_coding	54739	E	ENST00000361842	25.4726	0.389676	26.6801	2.40087e-07	7.12545e-05	-
ENST00000379052	ENSG00000112183	6	17281346	17293875	+	RBM24-001	protein_coding	ENSG00000112183	RBM24	protein_coding	221662	E	ENST00000379052	8.41268	-1.35209	26.6419	2.44877e-07	7.20602e-05	-
ENST00000287878	ENSG00000106617	7	151556111	151877125	-	PRKAG2-001	protein_coding	ENSG00000106617	PRKAG2	protein_coding	51422	E	ENST00000287878	12.9499	2.19363	26.5977	2.50539e-07	7.31068e-05	-
ENST00000340729	ENSG00000162129	11	72293303	72434534	-	CLPB-002	protein_coding	ENSG00000162129	CLPB	protein_coding	81570	E	ENST00000340729	15.233	1.5051	26.4728	2.67275e-07	7.73404e-05	-
MSTRG.2671.17	NA	1	155709777	155729261	+	not_in_ref	not_in_ref	not_in_ref	not_in_ref	not_in_ref	no_EG	j	ENST00000368336	0.118846	0.801123	26.4215	2.74463e-07	7.85375e-05	-
ENST00000433129	ENSG00000064687	19	1041246	1065572	+	ABCA7-001	protein_coding	ENSG00000064687	ABCA7	protein_coding	10347	noCuffcomp	noCuffcomp	11.1751	0.814408	26.4112	2.75935e-07	7.85375e-05	-
MSTRG.2347.4	NA	1	149054033	149103512	-	not_in_ref	not_in_ref	not_in_ref	not_in_ref	not_in_ref	no_EG	j	ENST00000615421	10.7369	2.39841	26.3311	2.87618e-07	8.11971e-05	-
ENST00000298684	ENSG00000165795	14	21016811	21023327	-	NDRG2-004	protein_coding	ENSG00000165795	NDRG2	protein_coding	57447	E	ENST00000298684	13.9186	4.22059	26.1304	3.19128e-07	8.9366e-05	-
ENST00000590665	ENSG00000152234	18	46084150	46098296	-	ATP5A1-009	protein_coding	ENSG00000152234	ATP5A1	protein_coding	498	E	ENST00000590665	-12.7839	5.30359	25.9283	3.54338e-07	9.84324e-05	-
MSTRG.37498.1	NA	8	56049681	56051138	-	not_in_ref	not_in_ref	not_in_ref	not_in_ref	not_in_ref	no_EG	o	ENST00000435260	-7.4295	-1.05314	25.8839	3.62578e-07	9.9922e-05	-
MSTRG.14064.21	NA	16	579091	584108	+	not_in_ref	not_in_ref	not_in_ref	not_in_ref	not_in_ref	no_EG	j	ENST00000443147	20.3343	1.02139	25.8433	3.70289e-07	0.000101243	-
ENST00000379573	ENSG00000125843	20	3820531	3825302	+	AP5S1-003	protein_coding	ENSG00000125843	AP5S1	protein_coding	55317	E	ENST00000379573	16.2914	0.182446	25.791	3.80456e-07	0.000102662	-
ENST00000238609	ENSG00000119632	14	94127781	94129664	-	IFI27L2-001	protein_coding	ENSG00000119632	IFI27L2	protein_coding	83982	E	ENST00000238609	-7.30622	1.00347	25.7863	3.8139e-07	0.000102662	-
ENST00000545668	ENSG00000013573	12	31073894	31104791	+	DDX11-003	protein_coding	ENSG00000013573	DDX11	protein_coding	1663	E	ENST00000545668	-7.69688	-0.149987	25.7195	3.94822e-07	0.00010546	-
ENST00000257694	ENSG00000135241	7	108471555	108526194	-	PNPLA8-001	protein_coding	ENSG00000135241	PNPLA8	protein_coding	50640	E	ENST00000257694	23.8189	2.293	25.5854	4.23227e-07	0.000112184	-
ENST00000375896	ENSG00000204438	6	31662076	31665390	-	GPANK1-005	protein_coding	ENSG00000204438	GPANK1	protein_coding	7918	E	ENST00000375896	-12.3558	-1.64621	25.5175	4.38377e-07	0.00011532	-
MSTRG.534.6	NA	1	22451889	22531093	+	not_in_ref	not_in_ref	not_in_ref	not_in_ref	not_in_ref	no_EG	j	ENST00000404138	10.6264	0.303868	25.4921	4.44205e-07	0.000115974	-
ENST00000389266	ENSG00000106105	7	30594681	30634033	+	GARS-001	protein_coding	ENSG00000106105	GARS	protein_coding	2617	E	ENST00000389266	10.3416	3.92603	25.2343	5.07723e-07	0.000131568	-
MSTRG.13703.10	NA	15	80153415	80186348	+	not_in_ref	not_in_ref	not_in_ref	not_in_ref	not_in_ref	no_EG	j	ENST00000407106	8.78631	4.06413	25.1253	5.37247e-07	0.000138188	-
ENST00000420541	ENSG00000121858	3	172505662	172523475	-	TNFSF10-002	protein_coding	ENSG00000121858	TNFSF10	protein_coding	8743	E	ENST00000420541	-9.23679	1.2868	24.9144	5.9932e-07	0.00015302	-
ENST00000372106	ENSG00000101888	X	109536876	109544690	+	NXT2-002	protein_coding	ENSG00000101888	NXT2	protein_coding	55916	E	ENST00000372106	8.73418	2.32578	24.8368	6.23938e-07	0.000158143	-
ENST00000514429	ENSG00000197603	5	37106978	37213622	-	C5orf42-014	protein_coding	ENSG00000197603	C5orf42	protein_coding	65250	E	ENST00000514429	10.9607	-0.0846935	24.798	6.36625e-07	0.000160059	-
ENST00000487179	ENSG00000244693	7	144266701	144269288	-	CTAGE8-001	protein_coding	ENSG00000244693	CTAGE8	protein_coding	100142659	E	ENST00000487179	12.6036	-0.694446	24.7857	6.40716e-07	0.000160059	-
ENST00000556483	ENSG00000129460	14	23470050	23478074	+	NGDN-012	protein_coding	ENSG00000129460	NGDN	protein_coding	25983	E	ENST00000556483	10.8418	0.666786	24.7718	6.45354e-07	0.000160066	-
MSTRG.40282.15	NA	X	2486427	2500882	-	not_in_ref	not_in_ref	not_in_ref	not_in_ref	not_in_ref	no_EG	j	ENST00000334651	-7.81342	1.88065	24.7279	6.60214e-07	0.000161831	-
MSTRG.40556.3	NA	X	41085635	41234283	+	not_in_ref	not_in_ref	not_in_ref	not_in_ref	not_in_ref	no_EG	j	ENST00000324545	10.3412	3.14402	24.7233	6.6179e-07	0.000161831	-
ENST00000594724	ENSG00000053501	19	17215398	17219819	+	USE1-007	nonsense_mediated_decay	ENSG00000053501	USE1	protein_coding	55850	E	ENST00000594724	-12.519	0.358332	24.6291	6.94948e-07	0.000168751	-
MSTRG.2610.21	NA	1	154962298	154974284	-	not_in_ref	not_in_ref	not_in_ref	not_in_ref	not_in_ref	no_EG	j	ENST00000368453	12.54	2.24329	24.5144	7.37549e-07	0.000177852	-
ENST00000567298	ENSG00000104731	16	87698149	87765972	-	KLHDC4-005	nonsense_mediated_decay	ENSG00000104731	KLHDC4	protein_coding	54758	E	ENST00000567298	10.5034	0.072563	24.4656	7.56497e-07	0.000181163	-
ENST00000476854	ENSG00000243989	3	51983443	51989197	+	ACY1-006	protein_coding	ENSG00000243989	ACY1	protein_coding	NA	E	ENST00000476854	11.9664	1.5031	24.44	7.66617e-07	0.000181448	-
ENST00000519234	ENSG00000198363	8	61624537	61714525	-	ASPH-011	protein_coding	ENSG00000198363	ASPH	protein_coding	444	E	ENST00000519234	10.4591	4.67978	24.4242	7.72915e-07	0.000181448	-
ENST00000264868	ENSG00000091490	4	25747433	25863595	-	SEL1L3-001	protein_coding	ENSG00000091490	SEL1L3	protein_coding	23231	E	ENST00000264868	12.1697	-1.12962	24.4231	7.73362e-07	0.000181448	-
MSTRG.11234.1	NA	14	30893637	31026286	-	not_in_ref	not_in_ref	not_in_ref	not_in_ref	not_in_ref	no_EG	j	ENST00000357479	11.0037	1.18161	24.3448	8.05444e-07	0.000187706	-
ENST00000392587	ENSG00000112290	6	110099819	110179702	-	WASF1-004	protein_coding	ENSG00000112290	WASF1	protein_coding	8936	E	ENST00000392587	9.54216	1.36453	24.2531	8.44694e-07	0.000195125	-
ENST00000470345	ENSG00000143416	1	151364309	151372706	-	SELENBP1-002	retained_intron	ENSG00000143416	SELENBP1	protein_coding	8991	E	ENST00000470345	10.8486	1.32386	24.2444	8.48517e-07	0.000195125	-
MSTRG.9832.7	NA	12	120127243	120190392	-	not_in_ref	not_in_ref	not_in_ref	not_in_ref	not_in_ref	no_EG	j	ENST00000300648	-10.009	2.41619	24.2141	8.61982e-07	0.000196282	-
ENST00000614363	ENSG00000204387	6	31834922	31839766	+	C6orf48-201	protein_coding	ENSG00000204387	C6orf48	protein_coding	50854	E	ENST00000614363	12.464	2.34518	24.2077	8.64855e-07	0.000196282	-
MSTRG.28044.4	NA	3	139353949	139389676	-	not_in_ref	not_in_ref	not_in_ref	not_in_ref	not_in_ref	no_EG	j	ENST00000333188	-12.6797	2.57963	24.1812	8.76857e-07	0.000197714	-
MSTRG.2661.59	NA	1	155749599	155853797	-	not_in_ref	not_in_ref	not_in_ref	not_in_ref	not_in_ref	no_EG	j	ENST00000368331	8.79032	2.28895	24.1372	8.97125e-07	0.000200789	-
ENST00000508726	ENSG00000134058	5	69234969	69276569	+	CDK7-013	nonsense_mediated_decay	ENSG00000134058	CDK7	protein_coding	1022	noCuffcomp	noCuffcomp	10.9248	0.0607604	24.1266	9.02059e-07	0.000200789	-
MSTRG.33693.11	NA	6	63636017	63714509	+	not_in_ref	not_in_ref	not_in_ref	not_in_ref	not_in_ref	no_EG	j	ENST00000509876	-11.9879	4.38637	24.0657	9.31033e-07	0.000205918	-
MSTRG.16836.7	NA	17	38765722	38799522	-	not_in_ref	not_in_ref	not_in_ref	not_in_ref	not_in_ref	no_EG	j	ENST00000619039	10.3458	2.33688	24.0183	9.54261e-07	0.00020972	-
MSTRG.16033.5	NA	17	7562122	7571686	+	not_in_ref	not_in_ref	not_in_ref	not_in_ref	not_in_ref	no_EG	j	ENST00000614237	10.4579	2.66086	23.9247	1.00177e-06	0.000218776	-
MSTRG.40616.10	NA	X	47145279	47186774	+	not_in_ref	not_in_ref	not_in_ref	not_in_ref	not_in_ref	no_EG	j	ENST00000377604	-12.2717	2.10804	23.9022	1.01354e-06	0.000219964	-
MSTRG.23377.27	NA	2	201118664	201171141	+	not_in_ref	not_in_ref	not_in_ref	not_in_ref	not_in_ref	no_EG	j	ENST00000309955	10.5025	4.18894	23.8723	1.02942e-06	0.000222022	-
ENST00000312726	ENSG00000143774	1	228140290	228148946	+	GUK1-001	protein_coding	ENSG00000143774	GUK1	protein_coding	2987	E	ENST00000312726	12.254	3.06607	23.8594	1.03634e-06	0.000222134	-
ENST00000429897	ENSG00000242086	3	195658065	195688862	+	LINC00969-040	lincRNA	ENSG00000242086	LINC00969	lincRNA	727956	E	ENST00000429897	11.0834	-0.286002	23.7377	1.10398e-06	0.000234869	-
MSTRG.27929.62	NA	3	131154019	131350444	+	not_in_ref	not_in_ref	not_in_ref	not_in_ref	not_in_ref	no_EG	j	ENST00000383366	12.9453	-0.0489634	23.7285	1.10927e-06	0.000234869	-
MSTRG.14710.4	NA	16	28605591	28610032	-	not_in_ref	not_in_ref	not_in_ref	not_in_ref	not_in_ref	no_EG	j	ENST00000564818	11.4951	0.71148	23.623	1.17181e-06	0.000246606	-
MSTRG.4191.6	NA	10	12167577	12189592	-	not_in_ref	not_in_ref	not_in_ref	not_in_ref	not_in_ref	no_EG	j	ENST00000378937	10.184	3.0298	23.594	1.18957e-06	0.000248589	-
MSTRG.34544.7	NA	6	156829230	157210750	+	not_in_ref	not_in_ref	not_in_ref	not_in_ref	not_in_ref	no_EG	j	ENST00000346085	4.98901	0.802053	23.5844	1.19555e-06	0.000248589	-
ENST00000371945	ENSG00000079277	1	46557419	46604237	-	MKNK1-004	protein_coding	ENSG00000079277	MKNK1	protein_coding	8569	E	ENST00000371945	11.0583	2.00987	23.5011	1.24845e-06	0.000258042	-
MSTRG.815.18	NA	1	32621830	32650525	-	not_in_ref	not_in_ref	not_in_ref	not_in_ref	not_in_ref	no_EG	j	ENST00000468695	10.1251	0.291207	23.4424	1.2871e-06	0.000262576	-
MSTRG.27747.3	NA	3	123913422	123961209	-	not_in_ref	not_in_ref	not_in_ref	not_in_ref	not_in_ref	no_EG	j	ENST00000409697	14.796	-0.467446	23.4344	1.29245e-06	0.000262576	-
ENST00000416188	ENSG00000070047	11	576521	611964	+	PHRF1-008	protein_coding	ENSG00000070047	PHRF1	protein_coding	57661	E	ENST00000416188	8.61644	2.90932	23.4335	1.29307e-06	0.000262576	-
MSTRG.27092.14	NA	3	52475616	52493069	+	not_in_ref	not_in_ref	not_in_ref	not_in_ref	not_in_ref	no_EG	j	ENST00000479054	10.4614	2.68392	23.3336	1.362e-06	0.000274965	-
ENST00000346964	ENSG00000075711	3	197042560	197298576	-	DLG1-001	protein_coding	ENSG00000075711	DLG1	protein_coding	1739	E	ENST00000346964	11.3187	1.74171	23.3199	1.37171e-06	0.000275325	-
ENST00000478396	ENSG00000136536	2	159759292	159767850	+	MARCH7-008	processed_transcript	ENSG00000136536	MARCH7	protein_coding	64844	E	ENST00000478396	12.1471	0.80913	23.3041	1.38307e-06	0.000276009	-
ENST00000310991	ENSG00000178821	1	1917591	1919273	-	TMEM52-001	protein_coding	ENSG00000178821	TMEM52	protein_coding	339456	E	ENST00000310991	-6.80052	0.534475	23.281	1.39973e-06	0.00027689	-
ENST00000579788	ENSG00000108622	17	64002596	64020602	-	ICAM2-001	protein_coding	ENSG00000108622	ICAM2	protein_coding	3384	E	ENST00000579788	10.342	1.96808	23.276	1.40343e-06	0.00027689	-
ENST00000223023	ENSG00000106299	7	123681935	123749067	-	WASL-001	protein_coding	ENSG00000106299	WASL	protein_coding	8976	E	ENST00000223023	10.4164	3.53688	23.2284	1.4386e-06	0.000282226	-
MSTRG.2629.1	NA	1	155234452	155244546	-	not_in_ref	not_in_ref	not_in_ref	not_in_ref	not_in_ref	no_EG	j	ENST00000327247	-13.1803	0.6172	23.1866	1.47022e-06	0.000286808	-
MSTRG.9770.6	NA	12	116717449	116734582	-	not_in_ref	not_in_ref	not_in_ref	not_in_ref	not_in_ref	no_EG	j	ENST00000261318	10.701	0.135091	23.1684	1.48413e-06	0.000287905	-
ENST00000266771	ENSG00000139370	12	128793191	128823983	-	SLC15A4-001	protein_coding	ENSG00000139370	SLC15A4	protein_coding	121260	E	ENST00000266771	10.0818	1.60702	23.1461	1.50147e-06	0.000289651	-
ENST00000418368	ENSG00000215190	6	57946078	57961380	-	LINC00680-004	lincRNA	ENSG00000215190	LINC00680	lincRNA	NA	E	ENST00000418368	10.232	0.346347	23.0621	1.56855e-06	0.000300919	-
MSTRG.501.5	NA	1	20742682	20787275	-	not_in_ref	not_in_ref	not_in_ref	not_in_ref	not_in_ref	no_EG	j	ENST00000312239	10.553	4.75239	23.0195	1.60365e-06	0.000305962	-
MSTRG.25365.9	NA	21	45512558	45544243	-	not_in_ref	not_in_ref	not_in_ref	not_in_ref	not_in_ref	no_EG	j	ENST00000311124	10.344	2.18396	22.9922	1.6266e-06	0.000308646	-
ENST00000376572	ENSG00000116685	1	11919591	11926423	-	KIAA2013-002	protein_coding	ENSG00000116685	KIAA2013	protein_coding	90231	E	ENST00000376572	8.75245	4.11787	22.9345	1.67616e-06	0.000316321	-
MSTRG.28015.9	NA	3	138654068	138707798	-	not_in_ref	not_in_ref	not_in_ref	not_in_ref	not_in_ref	no_EG	j	ENST00000462898	10.351	3.14466	22.8835	1.7212e-06	0.000323064	-
ENST00000622875	ENSG00000164330	5	158695916	158840123	-	EBF1-201	protein_coding	ENSG00000164330	EBF1	protein_coding	1879	E	ENST00000622875	10.0029	3.92546	22.8543	1.74755e-06	0.000326246	-
MSTRG.11212.5	NA	14	24430100	24441825	+	not_in_ref	not_in_ref	not_in_ref	not_in_ref	not_in_ref	no_EG	j	ENST00000251343	8.58248	4.4889	22.7995	1.79816e-06	0.000333899	-
MSTRG.38788.2	NA	9	33401472	33410553	+	not_in_ref	not_in_ref	not_in_ref	not_in_ref	not_in_ref	no_EG	o	ENST00000450864	15.2079	0.54119	22.7596	1.83588e-06	0.000338762	-
MSTRG.15869.14	NA	17	2362114	2381032	+	not_in_ref	not_in_ref	not_in_ref	not_in_ref	not_in_ref	no_EG	j	ENST00000268989	12.1435	2.36108	22.7512	1.84385e-06	0.000338762	-
MSTRG.2509.1	NA	1	151770008	151790407	-	not_in_ref	not_in_ref	not_in_ref	not_in_ref	not_in_ref	no_EG	j	ENST00000368822	10.6607	-1.50776	22.715	1.87891e-06	0.000343386	-
MSTRG.39703.5	NA	9	120843226	120854390	+	not_in_ref	not_in_ref	not_in_ref	not_in_ref	not_in_ref	no_EG	j	ENST00000588973	10.8115	0.719945	22.598	1.99693e-06	0.000363044	-
MSTRG.32412.11	NA	5	173067073	173139279	+	not_in_ref	not_in_ref	not_in_ref	not_in_ref	not_in_ref	no_EG	j	ENST00000296953	-9.25549	3.73825	22.5865	2.00887e-06	0.000363313	-
MSTRG.33198.6	NA	6	31662076	31665630	-	not_in_ref	not_in_ref	not_in_ref	not_in_ref	not_in_ref	no_EG	j	ENST00000375906	9.66405	2.53035	22.5231	2.07635e-06	0.000373572	-
MSTRG.35275.4	NA	7	41961018	42024019	-	not_in_ref	not_in_ref	not_in_ref	not_in_ref	not_in_ref	no_EG	j	ENST00000395925	13.1433	2.049	22.4856	2.11724e-06	0.000378964	-
MSTRG.20308.12	NA	19	45040270	45070873	+	not_in_ref	not_in_ref	not_in_ref	not_in_ref	not_in_ref	no_EG	j	ENST00000221455	9.57291	2.38062	22.3869	2.22885e-06	0.000396896	-
ENST00000393230	ENSG00000106459	7	129630068	129757082	+	NRF1-003	protein_coding	ENSG00000106459	NRF1	protein_coding	4899	E	ENST00000393230	9.85498	2.60334	22.3412	2.28258e-06	0.00040439	-
MSTRG.37545.1	NA	8	63015079	63038801	-	not_in_ref	not_in_ref	not_in_ref	not_in_ref	not_in_ref	no_EG	j	ENST00000260118	9.77597	1.03435	22.2971	2.33564e-06	0.00041169	-
MSTRG.20220.16	NA	19	42269371	42295777	+	not_in_ref	not_in_ref	not_in_ref	not_in_ref	not_in_ref	no_EG	j	ENST00000572681	8.78925	3.06545	22.2724	2.36587e-06	0.000414911	-
MSTRG.38363.10	NA	8	143915155	143973444	-	not_in_ref	not_in_ref	not_in_ref	not_in_ref	not_in_ref	no_EG	j	ENST00000436759	8.60297	3.67803	22.2179	2.43396e-06	0.000423676	-
MSTRG.26971.41	NA	3	48693785	48717192	-	not_in_ref	not_in_ref	not_in_ref	not_in_ref	not_in_ref	no_EG	j	ENST00000433104	10.0664	-0.114583	22.2129	2.44025e-06	0.000423676	-
ENST00000620148	ENSG00000274487	17	38195740	38257152	-	CH17-431G21.1-001	unprocessed_pseudogene	ENSG00000274487	CH17-431G21.1	unprocessed_pseudogene	440434	E	ENST00000620148	11.0462	0.500203	22.0963	2.59309e-06	0.000447948	-
ENST00000300849	ENSG00000167394	16	31060850	31074320	-	ZNF668-001	protein_coding	ENSG00000167394	ZNF668	protein_coding	79759	E	ENST00000300849	7.58482	0.547255	22.0869	2.60585e-06	0.000447948	-
ENST00000327705	ENSG00000165810	5	181040225	181061523	+	BTNL9-001	protein_coding	ENSG00000165810	BTNL9	protein_coding	153579	E	ENST00000327705	9.85357	3.63547	22.0448	2.66356e-06	0.000455614	-
ENST00000402050	ENSG00000106012	7	2558998	2614734	+	IQCE-001	protein_coding	ENSG00000106012	IQCE	protein_coding	23288	E	ENST00000402050	9.98037	2.04766	22.0044	2.7203e-06	0.000463038	-
MSTRG.38861.14	NA	9	35385737	35405326	+	not_in_ref	not_in_ref	not_in_ref	not_in_ref	not_in_ref	no_EG	j	ENST00000617908	9.93237	1.69454	21.9658	2.77553e-06	0.000468841	-
MSTRG.17225.5	NA	17	48026171	48036906	-	not_in_ref	not_in_ref	not_in_ref	not_in_ref	not_in_ref	no_EG	j	ENST00000621465	10.2314	2.80342	21.9617	2.7814e-06	0.000468841	-
MSTRG.26995.16	NA	3	49108089	49119278	-	not_in_ref	not_in_ref	not_in_ref	not_in_ref	not_in_ref	no_EG	j	ENST00000453664	9.55389	3.72899	21.931	2.82627e-06	0.000474104	-
ENST00000318622	ENSG00000005486	7	75878999	75888926	+	RHBDD2-201	protein_coding	ENSG00000005486	RHBDD2	protein_coding	57414	E	ENST00000318622	9.45894	2.70596	21.8963	2.87793e-06	0.000480448	-
ENST00000557609	ENSG00000100600	14	92703847	92748603	-	LGMN-007	nonsense_mediated_decay	ENSG00000100600	LGMN	protein_coding	5641	E	ENST00000557609	10.6043	4.15396	21.8733	2.91252e-06	0.000483897	-
MSTRG.36192.13	NA	7	112450508	112476186	+	not_in_ref	not_in_ref	not_in_ref	not_in_ref	not_in_ref	no_EG	j	ENST00000005558	9.36421	2.7196	21.8611	2.93123e-06	0.000484685	-
ENST00000617869	ENSG00000155100	8	91070196	91087091	+	OTUD6B-202	protein_coding	ENSG00000155100	OTUD6B	protein_coding	51633	noCuffcomp	noCuffcomp	9.67347	1.65685	21.8396	2.96423e-06	0.00048782	-
MSTRG.29725.18	NA	4	94455267	94668223	+	not_in_ref	not_in_ref	not_in_ref	not_in_ref	not_in_ref	no_EG	j	ENST00000615540	12.0905	4.43998	21.8082	3.01312e-06	0.000493527	-
ENST00000247933	ENSG00000127415	4	986997	1004506	+	IDUA-001	protein_coding	ENSG00000127415	IDUA	protein_coding	3425	E	ENST00000247933	9.03836	0.857043	21.7168	3.16013e-06	0.000514812	-
ENST00000368589	ENSG00000143543	1	153974512	153977660	-	JTB-003	protein_coding	ENSG00000143543	JTB	protein_coding	10899	E	ENST00000368589	9.83333	2.61662	21.7092	3.17273e-06	0.000514812	-
ENST00000340855	ENSG00000010404	X	149476990	149505347	-	IDS-001	protein_coding	ENSG00000010404	IDS	protein_coding	3423	E	ENST00000340855	-8.26413	-0.0243493	21.6881	3.20772e-06	0.000518069	-
ENST00000417268	ENSG00000213079	6	154733378	154834244	+	SCAF8-202	protein_coding	ENSG00000213079	SCAF8	protein_coding	22828	E	ENST00000417268	10.3471	3.15209	21.6712	3.23618e-06	0.000520246	-
ENST00000611779	ENSG00000213977	17	3662896	3668679	-	TAX1BP3-201	protein_coding	ENSG00000213977	TAX1BP3	protein_coding	30851	E	ENST00000611779	10.0576	-0.26101	21.6347	3.29825e-06	0.000523556	-
ENST00000427177	ENSG00000184640	17	77281410	77500592	+	SEPT9-001	protein_coding	ENSG00000184640	SEPT9	protein_coding	10801	E	ENST00000427177	10.5074	2.01825	21.6315	3.30389e-06	0.000523556	-
ENST00000282869	ENSG00000152926	7	64971776	64991036	-	ZNF117-002	protein_coding	ENSG00000152926	ZNF117	protein_coding	51351	noCuffcomp	noCuffcomp	10.5639	1.06944	21.6281	3.30967e-06	0.000523556	-
MSTRG.15447.29	NA	16	72056161	72061054	+	not_in_ref	not_in_ref	not_in_ref	not_in_ref	not_in_ref	no_EG	j	ENST00000357763	10.6246	2.76493	21.6238	3.31708e-06	0.000523556	-
ENST00000243189	ENSG00000117616	1	25242237	25247519	-	RSRP1-001	protein_coding	ENSG00000117616	RSRP1	protein_coding	101928189;57035	E	ENST00000243189	9.67529	0.390617	21.6012	3.35647e-06	0.000527376	-
MSTRG.29837.5	NA	4	107989902	108035171	+	not_in_ref	not_in_ref	not_in_ref	not_in_ref	not_in_ref	no_EG	j	ENST00000505878	-9.33162	3.1869	21.5728	3.40654e-06	0.000532832	-
ENST00000426877	ENSG00000181029	19	7680879	7682858	+	TRAPPC5-003	protein_coding	ENSG00000181029	TRAPPC5	protein_coding	126003	E	ENST00000426877	13.7011	1.48536	21.451	3.62982e-06	0.000565211	-
ENST00000347992	ENSG00000141503	17	4833400	4898054	+	MINK1-002	protein_coding	ENSG00000141503	MINK1	protein_coding	50488	E	ENST00000347992	-12.7539	1.64679	21.4372	3.65604e-06	0.000566752	-
MSTRG.12996.4	NA	15	43785462	43796089	+	not_in_ref	not_in_ref	not_in_ref	not_in_ref	not_in_ref	no_EG	j	ENST00000448830	9.70309	-0.0424217	21.4047	3.71862e-06	0.00057389	-
MSTRG.39542.8	NA	9	104781002	104928139	-	not_in_ref	not_in_ref	not_in_ref	not_in_ref	not_in_ref	no_EG	j	ENST00000374736	5.57699	2.51648	21.3762	3.77424e-06	0.000579896	-
MSTRG.22833.3	NA	2	156324435	156332611	-	not_in_ref	not_in_ref	not_in_ref	not_in_ref	not_in_ref	no_EG	j	ENST00000339562	9.66812	2.426	21.2723	3.98445e-06	0.000608531	-
ENST00000416918	ENSG00000171853	2	3465673	3479567	+	TRAPPC12-021	protein_coding	ENSG00000171853	TRAPPC12	protein_coding	51112	E	ENST00000416918	9.47911	0.888286	21.2669	3.99565e-06	0.000608531	-
MSTRG.16539.11	NA	17	29568027	29573157	+	not_in_ref	not_in_ref	not_in_ref	not_in_ref	not_in_ref	no_EG	j	ENST00000301057	10.6442	3.25223	21.257	4.01645e-06	0.000609026	-
MSTRG.39852.25	NA	9	128166307	128190834	-	not_in_ref	not_in_ref	not_in_ref	not_in_ref	not_in_ref	no_EG	j	ENST00000538431	9.90048	1.61199	21.2138	4.10797e-06	0.000620197	-
ENST00000457309	ENSG00000164924	8	100918579	100952993	-	YWHAZ-202	protein_coding	ENSG00000164924	YWHAZ	protein_coding	7534	E	ENST00000457309	10.0245	6.02938	21.1844	4.17152e-06	0.000626281	-
ENST00000439924	ENSG00000182149	16	71915626	71929002	+	IST1-011	nonsense_mediated_decay	ENSG00000182149	IST1	protein_coding	9798	E	ENST00000439924	9.56112	2.2477	21.1785	4.18435e-06	0.000626281	-
MSTRG.24543.4	NA	20	43458989	43463605	+	not_in_ref	not_in_ref	not_in_ref	not_in_ref	not_in_ref	no_EG	j	ENST00000483871	10.797	0.267168	21.1439	4.26049e-06	0.000632972	-
ENST00000396912	ENSG00000146587	7	5045922	5069488	+	RBAK-201	protein_coding	ENSG00000146587	RBAK	protein_coding	57786	E	ENST00000396912	9.98589	0.82496	21.1417	4.26551e-06	0.000632972	-
MSTRG.27003.6	NA	3	49357180	49358321	-	not_in_ref	not_in_ref	not_in_ref	not_in_ref	not_in_ref	no_EG	j	ENST00000419783	10.1945	3.08264	21.0773	4.4112e-06	0.000651806	-
ENST00000542278	ENSG00000165195	X	15319451	15335554	-	PIGA-201	protein_coding	ENSG00000165195	PIGA	protein_coding	5277	E	ENST00000542278	8.26929	1.2078	20.9794	4.64248e-06	0.000678362	-
MSTRG.11798.8	NA	14	70907664	71115382	+	not_in_ref	not_in_ref	not_in_ref	not_in_ref	not_in_ref	no_EG	j	ENST00000304743	9.47378	5.16385	20.9742	4.65506e-06	0.000678362	-
MSTRG.37306.11	NA	8	37736827	37759032	+	not_in_ref	not_in_ref	not_in_ref	not_in_ref	not_in_ref	no_EG	j	ENST00000276461	-12.2453	3.19817	20.9704	4.66437e-06	0.000678362	-
MSTRG.15298.24	NA	16	68084751	68228549	+	not_in_ref	not_in_ref	not_in_ref	not_in_ref	not_in_ref	no_EG	j	ENST00000349223	9.66957	0.7589	20.9685	4.66906e-06	0.000678362	-
MSTRG.24155.3	NA	20	13389422	13638903	-	not_in_ref	not_in_ref	not_in_ref	not_in_ref	not_in_ref	no_EG	j	ENST00000337743	9.45055	0.728799	20.8949	4.85193e-06	0.000699305	-
ENST00000397370	ENSG00000131051	20	35734876	35742232	-	RBM39-013	protein_coding	ENSG00000131051	RBM39	protein_coding	9584	E	ENST00000397370	-11.0985	-0.774786	20.8943	4.85349e-06	0.000699305	-
ENST00000451521	ENSG00000204536	6	31142520	31157607	-	CCHCR1-011	protein_coding	ENSG00000204536	CCHCR1	protein_coding	54535	E	ENST00000451521	10.546	-1.40441	20.8749	4.90285e-06	0.000701569	-
ENST00000398529	ENSG00000138069	2	65087871	65130101	-	RAB1A-004	protein_coding	ENSG00000138069	RAB1A	protein_coding	5861	E	ENST00000398529	12.0899	1.59136	20.8722	4.90961e-06	0.000701569	-
MSTRG.6168.4	NA	11	22813825	22829865	-	not_in_ref	not_in_ref	not_in_ref	not_in_ref	not_in_ref	no_EG	j	ENST00000354193	8.74142	0.812837	20.8527	4.95993e-06	0.000704957	-
MSTRG.2474.13	NA	1	151292132	151324884	-	not_in_ref	not_in_ref	not_in_ref	not_in_ref	not_in_ref	no_EG	j	ENST00000368875	5.17387	2.39175	20.8473	4.97393e-06	0.000704957	-
ENST00000574671	ENSG00000184009	17	81509999	81511848	-	ACTG1-008	retained_intron	ENSG00000184009	ACTG1	protein_coding	71	E	ENST00000574671	8.6906	-0.117991	20.827	5.02689e-06	0.000709568	-
ENST00000423684	ENSG00000223959	16	89977694	89984701	+	AFG3L1P-006	retained_intron	ENSG00000223959	AFG3L1P	unitary_pseudogene	172	E	ENST00000423684	10.6905	-1.36424	20.7829	5.14409e-06	0.000723171	-
MSTRG.31318.5	NA	5	79069768	79090085	+	not_in_ref	not_in_ref	not_in_ref	not_in_ref	not_in_ref	no_EG	j	ENST00000255192	10.7064	2.7717	20.7693	5.18066e-06	0.000725376	-
ENST00000538492	ENSG00000197562	16	590077	629271	+	RAB40C-202	protein_coding	ENSG00000197562	RAB40C	protein_coding	57799	E	ENST00000538492	9.93419	0.44615	20.7499	5.23351e-06	0.000729833	-
ENST00000372230	ENSG00000080189	20	46349528	46364395	-	SLC35C2-013	protein_coding	ENSG00000080189	SLC35C2	protein_coding	51006	E	ENST00000372230	10.148	3.63799	20.7221	5.31006e-06	0.000737546	-
ENST00000573947	ENSG00000072210	17	19663386	19675779	+	ALDH3A2-011	nonsense_mediated_decay	ENSG00000072210	ALDH3A2	protein_coding	224	noCuffcomp	noCuffcomp	10.6159	0.526292	20.7082	5.34855e-06	0.000739932	-
MSTRG.24400.5	NA	20	34089416	34112185	-	not_in_ref	not_in_ref	not_in_ref	not_in_ref	not_in_ref	no_EG	j	ENST00000374980	9.19709	3.13783	20.6503	5.51288e-06	0.00075964	-
ENST00000444574	ENSG00000102572	13	98455982	98519267	-	STK24-003	protein_coding	ENSG00000102572	STK24	protein_coding	8428	noCuffcomp	noCuffcomp	10.5078	-1.22948	20.5912	5.68582e-06	0.000780373	-
ENST00000527898	ENSG00000019144	11	118631916	118658025	+	PHLDB1-009	processed_transcript	ENSG00000019144	PHLDB1	protein_coding	23187	noCuffcomp	noCuffcomp	7.98957	5.58992	20.516	5.91343e-06	0.000805838	-
MSTRG.1912.9	NA	1	109214020	109238120	+	not_in_ref	not_in_ref	not_in_ref	not_in_ref	not_in_ref	no_EG	j	ENST00000369923	-10.6345	3.24358	20.5146	5.91777e-06	0.000805838	-
ENST00000438257	ENSG00000211448	14	80197530	80211627	-	DIO2-002	protein_coding	ENSG00000211448	DIO2	protein_coding	1734	E	ENST00000438257	8.07981	0.358122	20.5007	5.96086e-06	0.000808535	-
ENST00000341744	ENSG00000124225	20	57648392	57709902	-	PMEPA1-001	protein_coding	ENSG00000124225	PMEPA1	protein_coding	56937	E	ENST00000341744	9.16704	2.43795	20.4553	6.10414e-06	0.000823289	-
MSTRG.11185.32	NA	14	24233483	24239241	+	not_in_ref	not_in_ref	not_in_ref	not_in_ref	not_in_ref	no_EG	j	ENST00000561038	4.33951	1.23959	20.4512	6.11705e-06	0.000823289	-
ENST00000287706	ENSG00000157045	16	15037853	15056064	-	NTAN1-001	protein_coding	ENSG00000157045	NTAN1	protein_coding	123803	E	ENST00000287706	10.0812	1.94154	20.4421	6.14628e-06	0.000823478	-
MSTRG.17342.39	NA	17	50547743	50555849	+	not_in_ref	not_in_ref	not_in_ref	not_in_ref	not_in_ref	no_EG	j	ENST00000504334	9.12959	2.9607	20.436	6.16589e-06	0.000823478	-
MSTRG.1055.13	NA	1	43531031	43622357	+	not_in_ref	not_in_ref	not_in_ref	not_in_ref	not_in_ref	no_EG	j	ENST00000359947	10.8885	3.24008	20.4226	6.20918e-06	0.000826082	-
MSTRG.13347.16	NA	15	64114628	64134801	+	not_in_ref	not_in_ref	not_in_ref	not_in_ref	not_in_ref	no_EG	j	ENST00000380285	4.38936	2.08181	20.3983	6.28855e-06	0.000833449	-
MSTRG.4657.17	NA	10	50084067	50133504	+	not_in_ref	not_in_ref	not_in_ref	not_in_ref	not_in_ref	no_EG	j	ENST00000282633	10.0621	3.37953	20.3447	6.46734e-06	0.000853885	-
ENST00000446916	ENSG00000088812	20	3471108	3615947	+	ATRN-001	protein_coding	ENSG00000088812	ATRN	protein_coding	8455	E	ENST00000446916	10.0859	-0.451036	20.308	6.59253e-06	0.000867117	-
ENST00000564031	ENSG00000140876	16	77737405	77742257	+	NUDT7-007	processed_transcript	ENSG00000140876	NUDT7	protein_coding	283927	E	ENST00000564031	11.733	1.02554	20.2713	6.7201e-06	0.000880561	-
MSTRG.20356.7	NA	19	45769720	45791083	-	not_in_ref	not_in_ref	not_in_ref	not_in_ref	not_in_ref	no_EG	j	ENST00000588522	10.1736	2.47597	20.2388	6.83509e-06	0.000892262	-
MSTRG.2553.3	NA	1	153618799	153634254	-	not_in_ref	not_in_ref	not_in_ref	not_in_ref	not_in_ref	no_EG	j	ENST00000497086	-5.66741	-0.27659	20.2097	6.94016e-06	0.000901634	-
MSTRG.39759.7	NA	9	123379701	123790308	-	not_in_ref	not_in_ref	not_in_ref	not_in_ref	not_in_ref	no_EG	j	ENST00000373624	10.3806	1.52341	20.2045	6.95881e-06	0.000901634	-
ENST00000418924	ENSG00000100599	14	92576234	92688987	+	RIN3-005	processed_transcript	ENSG00000100599	RIN3	protein_coding	79890	E	ENST00000418924	-10.8358	0.512176	20.1436	7.18399e-06	0.000927349	-
ENST00000344417	ENSG00000146576	7	6590017	6608726	+	C7orf26-001	protein_coding	ENSG00000146576	C7orf26	protein_coding	79034	E	ENST00000344417	10.0048	1.39231	20.1362	7.21184e-06	0.000927496	-
MSTRG.22082.1	NA	2	86720173	86777986	+	not_in_ref	not_in_ref	not_in_ref	not_in_ref	not_in_ref	no_EG	j	ENST00000283632	9.67123	3.34854	20.0966	7.3628e-06	0.000942971	-
MSTRG.38162.4	NA	8	123503118	123540958	-	not_in_ref	not_in_ref	not_in_ref	not_in_ref	not_in_ref	no_EG	j	ENST00000517956	9.71705	0.102598	20.0904	7.38648e-06	0.000942971	-
MSTRG.33839.58	NA	6	85677084	85678640	-	not_in_ref	not_in_ref	not_in_ref	not_in_ref	not_in_ref	no_EG	j	ENST00000623901	7.57971	1.14019	20.0003	7.74287e-06	0.000984848	-
MSTRG.29283.4	NA	4	44678494	44700926	+	not_in_ref	not_in_ref	not_in_ref	not_in_ref	not_in_ref	no_EG	j	ENST00000281543	-7.19084	1.93767	19.9832	7.81265e-06	0.000990097	-
ENST00000503168	ENSG00000133835	5	119452775	119478999	+	HSD17B4-013	retained_intron	ENSG00000133835	HSD17B4	protein_coding	3295	noCuffcomp	noCuffcomp	3.73521	0.196957	19.925	8.05409e-06	0.00101698	-
MSTRG.11030.3	NA	14	22598294	22613077	+	not_in_ref	not_in_ref	not_in_ref	not_in_ref	not_in_ref	no_EG	j	ENST00000428304	9.82443	1.26078	19.9126	8.10656e-06	0.00101891	-
ENST00000610930	ENSG00000278259	17	36495755	36534927	-	MYO19-001	protein_coding	ENSG00000278259	MYO19	protein_coding	80179	E	ENST00000610930	9.08417	0.652092	19.9075	8.12804e-06	0.00101891	-
ENST00000253458	ENSG00000131149	16	85613216	85676204	+	GSE1-002	protein_coding	ENSG00000131149	GSE1	protein_coding	23199	E	ENST00000253458	9.59974	1.88754	19.8696	8.29091e-06	0.00103559	-
MSTRG.18105.9	NA	17	83092180	83094745	+	not_in_ref	not_in_ref	not_in_ref	not_in_ref	not_in_ref	no_EG	j	ENST00000320095	13.7261	0.996529	19.8506	8.3735e-06	0.00104216	-
MSTRG.13537.5	NA	15	73983220	73992256	-	not_in_ref	not_in_ref	not_in_ref	not_in_ref	not_in_ref	no_EG	j	ENST00000316900	9.62165	2.1739	19.8329	8.45168e-06	0.00104813	-
ENST00000615744	ENSG00000172366	16	642451	648437	+	FAM195A-010	processed_transcript	ENSG00000172366	FAM195A	protein_coding	84331	E	ENST00000615744	-10.2113	0.374431	19.8009	8.59432e-06	0.00106203	-
MSTRG.11745.8	NA	14	64022759	64226430	+	not_in_ref	not_in_ref	not_in_ref	not_in_ref	not_in_ref	no_EG	j	ENST00000358025	-11.268	0.167815	19.756	8.79867e-06	0.00108342	-
ENST00000488958	ENSG00000136147	13	49497113	49528976	+	PHF11-010	protein_coding	ENSG00000136147	PHF11	protein_coding	51131	noCuffcomp	noCuffcomp	11.2011	2.00833	19.7262	8.93698e-06	0.00109656	-
ENST00000264904	ENSG00000138768	4	75724598	75814286	+	USO1-007	protein_coding	ENSG00000138768	USO1	protein_coding	8615	E	ENST00000264904	9.67402	0.967854	19.7097	9.01433e-06	0.00110216	-
MSTRG.30020.3	NA	4	128292932	128519341	+	not_in_ref	not_in_ref	not_in_ref	not_in_ref	not_in_ref	no_EG	j	ENST00000511497	4.59795	-1.06051	19.6762	9.17377e-06	0.00111772	-
MSTRG.33220.10	NA	6	32027320	32035401	+	not_in_ref	not_in_ref	not_in_ref	not_in_ref	not_in_ref	no_EG	j	ENST00000435363	8.03472	3.83333	19.6184	9.4555e-06	0.00114802	-
MSTRG.14603.30	NA	16	20859577	20899918	-	not_in_ref	not_in_ref	not_in_ref	not_in_ref	not_in_ref	no_EG	j	ENST00000564349	7.4061	2.76997	19.6055	9.51945e-06	0.00115175	-
ENST00000446859	ENSG00000171757	3	169793428	169812664	-	LRRC34-003	protein_coding	ENSG00000171757	LRRC34	protein_coding	151827	E	ENST00000446859	11.6706	-1.40758	19.5634	9.73165e-06	0.00117334	-
MSTRG.26391.11	NA	3	9793095	9836078	+	not_in_ref	not_in_ref	not_in_ref	not_in_ref	not_in_ref	no_EG	j	ENST00000426895	10.3225	-0.299775	19.5528	9.78581e-06	0.00117579	-
ENST00000343736	ENSG00000005379	17	58302271	58328084	-	BZRAP1-002	protein_coding	ENSG00000005379	BZRAP1	protein_coding	9256	E	ENST00000343736	9.32758	1.31713	19.5318	9.89395e-06	0.00118468	-
ENST00000297195	ENSG00000164638	7	5282969	5304060	+	SLC29A4-002	protein_coding	ENSG00000164638	SLC29A4	protein_coding	222962	E	ENST00000297195	8.34784	3.45822	19.4932	1.00959e-05	0.00120461	-
MSTRG.24767.3	NA	20	57561103	57566367	+	not_in_ref	not_in_ref	not_in_ref	not_in_ref	not_in_ref	no_EG	j	ENST00000319441	10.0008	4.72342	19.4836	1.01467e-05	0.00120461	-
ENST00000423048	ENSG00000116127	2	73451697	73573580	+	ALMS1-003	nonsense_mediated_decay	ENSG00000116127	ALMS1	protein_coding	7840	E	ENST00000423048	9.61565	-0.51427	19.4803	1.01645e-05	0.00120461	-
MSTRG.19341.14	NA	19	11505929	11519844	-	not_in_ref	not_in_ref	not_in_ref	not_in_ref	not_in_ref	no_EG	j	ENST00000270517	9.74236	1.08745	19.4376	1.03941e-05	0.00122667	-
ENST00000619426	ENSG00000277791	17	38752736	38764231	+	PSMB3-001	protein_coding	ENSG00000277791	PSMB3	protein_coding	5691	E	ENST00000619426	9.41984	-0.478821	19.4266	1.04542e-05	0.00122667	-
ENST00000592009	ENSG00000267280	17	61393458	61411555	-	TBX2-AS1-001	antisense	ENSG00000267280	TBX2-AS1	antisense	NA	E	ENST00000592009	9.99032	0.306448	19.4261	1.04566e-05	0.00122667	-
ENST00000265187	ENSG00000125885	20	5950931	5995206	+	MCM8-002	protein_coding	ENSG00000125885	MCM8	protein_coding	84515	E	ENST00000265187	-8.32595	0.603533	19.3859	1.06794e-05	0.00124859	-
ENST00000398295	ENSG00000235847	2	84777259	84778223	-	LDHAP7-001	processed_pseudogene	ENSG00000235847	LDHAP7	processed_pseudogene	NA	E	ENST00000398295	9.75549	1.80797	19.3581	1.08357e-05	0.00126262	-
ENST00000622299	ENSG00000214087	17	81681187	81683763	-	ARL16-014	protein_coding	ENSG00000214087	ARL16	protein_coding	339231	noCuffcomp	noCuffcomp	9.18331	2.37857	19.3485	1.08904e-05	0.00126475	-
ENST00000467810	ENSG00000047410	1	186318505	186322701	-	TPR-008	processed_transcript	ENSG00000047410	TPR	protein_coding	7175	E	ENST00000467810	-10.4251	1.93373	19.3095	1.11151e-05	0.00128653	-
ENST00000317216	ENSG00000179388	8	22687659	22693302	-	EGR3-001	protein_coding	ENSG00000179388	EGR3	protein_coding	1960	E	ENST00000317216	9.8545	2.19739	19.2795	1.12911e-05	0.00129834	-
MSTRG.294.15	NA	1	10344775	10381603	+	not_in_ref	not_in_ref	not_in_ref	not_in_ref	not_in_ref	no_EG	j	ENST00000377086	-7.61565	2.84587	19.2794	1.12919e-05	0.00129834	-
ENST00000519359	ENSG00000157110	8	30474786	30570700	+	RBPMS-020	nonsense_mediated_decay	ENSG00000157110	RBPMS	protein_coding	11030	E	ENST00000519359	9.53182	0.252488	19.2544	1.14406e-05	0.00131111	-
ENST00000335870	ENSG00000170260	7	149239651	149255609	+	ZNF212-001	protein_coding	ENSG00000170260	ZNF212	protein_coding	7988	E	ENST00000335870	6.29782	-0.0969117	19.2373	1.15433e-05	0.00131852	-
ENST00000595565	ENSG00000104980	19	7926721	7932746	-	TIMM44-009	protein_coding	ENSG00000104980	TIMM44	protein_coding	10469	E	ENST00000595565	-11.0456	0.982024	19.2221	1.16359e-05	0.00132474	-
MSTRG.26302.15	NA	22	50711638	50733142	+	not_in_ref	not_in_ref	not_in_ref	not_in_ref	not_in_ref	no_EG	j	ENST00000262795	9.1188	2.07135	19.2003	1.17698e-05	0.0013356	-
ENST00000614500	ENSG00000116117	2	204965152	205620162	+	PARD3B-202	protein_coding	ENSG00000116117	PARD3B	protein_coding	117583	noCuffcomp	noCuffcomp	10.7364	2.82526	19.1812	1.18877e-05	0.00134458	-
MSTRG.30903.1	NA	5	42423445	42721877	+	not_in_ref	not_in_ref	not_in_ref	not_in_ref	not_in_ref	no_EG	j	ENST00000615111	-10.8441	2.76405	19.1654	1.19867e-05	0.00135049	-
ENST00000393527	ENSG00000136811	9	128456208	128500960	+	ODF2-005	protein_coding	ENSG00000136811	ODF2	protein_coding	4957	E	ENST00000393527	9.77828	0.923767	19.159	1.20271e-05	0.00135049	-
ENST00000520687	ENSG00000113140	5	151662488	151667654	-	SPARC-002	retained_intron	ENSG00000113140	SPARC	protein_coding	6678	E	ENST00000520687	10.9753	7.42459	19.1543	1.20566e-05	0.00135049	-
ENST00000519791	ENSG00000189376	8	123220195	123241286	-	C8orf76-004	processed_transcript	ENSG00000189376	C8orf76	protein_coding	84933	E	ENST00000519791	9.47142	-0.0619354	19.123	1.22558e-05	0.00136839	-
MSTRG.15458.3	NA	16	74621462	74664680	-	not_in_ref	not_in_ref	not_in_ref	not_in_ref	not_in_ref	no_EG	j	ENST00000571750	9.52542	0.791154	19.0904	1.2467e-05	0.00138751	-
ENST00000396330	ENSG00000104497	8	81799587	81842286	-	SNX16-201	protein_coding	ENSG00000104497	SNX16	protein_coding	64089	E	ENST00000396330	10.2109	1.12666	19.0449	1.27676e-05	0.00141643	-
MSTRG.28138.5	NA	3	148991540	149027693	+	not_in_ref	not_in_ref	not_in_ref	not_in_ref	not_in_ref	no_EG	j	ENST00000345003	-7.39235	1.72872	19.0373	1.28187e-05	0.00141757	-
ENST00000391944	ENSG00000104884	19	45351391	45370587	-	ERCC2-201	protein_coding	ENSG00000104884	ERCC2	protein_coding	2068	E	ENST00000391944	8.72494	1.23428	19.0108	1.29984e-05	0.00143221	-
ENST00000313582	ENSG00000104825	19	38899999	38908886	+	NFKBIB-002	protein_coding	ENSG00000104825	NFKBIB	protein_coding	4793	E	ENST00000313582	9.57927	2.65497	19.0056	1.30336e-05	0.00143221	-
ENST00000504930	ENSG00000113356	5	90474889	90514553	+	POLR3G-001	protein_coding	ENSG00000113356	POLR3G	protein_coding	10622	E	ENST00000504930	9.20411	-0.339562	18.9874	1.31586e-05	0.00143757	-
MSTRG.1644.5	NA	1	86704712	86748176	+	not_in_ref	not_in_ref	not_in_ref	not_in_ref	not_in_ref	no_EG	j	ENST00000482504	10.2407	3.68014	18.9864	1.31651e-05	0.00143757	-
MSTRG.13610.1	NA	15	75355756	75366048	-	not_in_ref	not_in_ref	not_in_ref	not_in_ref	not_in_ref	no_EG	j	ENST00000565683	9.3043	1.86367	18.9665	1.33036e-05	0.00144512	-
ENST00000308677	ENSG00000072062	19	14091688	14117744	-	PRKACA-001	protein_coding	ENSG00000072062	PRKACA	protein_coding	5566	E	ENST00000308677	9.45201	-1.46541	18.959	1.33559e-05	0.00144512	-
MSTRG.2304.3	NA	1	147642289	147670398	-	not_in_ref	not_in_ref	not_in_ref	not_in_ref	not_in_ref	no_EG	j	ENST00000583509	9.26265	0.399147	18.9585	1.33592e-05	0.00144512	-
ENST00000441236	ENSG00000132600	16	68315896	68357265	+	PRMT7-201	protein_coding	ENSG00000132600	PRMT7	protein_coding	54496	E	ENST00000441236	-9.71589	2.25643	18.949	1.34262e-05	0.00144786	-
MSTRG.2684.12	NA	1	156114711	156139171	+	not_in_ref	not_in_ref	not_in_ref	not_in_ref	not_in_ref	no_EG	j	ENST00000368301	4.21055	4.06321	18.9214	1.36214e-05	0.00146059	-
MSTRG.1777.5	NA	1	94927554	94963243	+	not_in_ref	not_in_ref	not_in_ref	not_in_ref	not_in_ref	no_EG	j	ENST00000438509	8.74946	0.324337	18.9204	1.36284e-05	0.00146059	-
ENST00000423585	ENSG00000154856	18	10454836	10487896	+	APCDD1-002	nonsense_mediated_decay	ENSG00000154856	APCDD1	protein_coding	NA	E	ENST00000423585	-6.50531	0.222099	18.8772	1.39412e-05	0.00148952	-
ENST00000496518	ENSG00000123552	6	99432436	99508781	-	USP45-001	nonsense_mediated_decay	ENSG00000123552	USP45	protein_coding	85015	E	ENST00000496518	8.91651	0.616345	18.8557	1.40987e-05	0.00150173	-
ENST00000407559	ENSG00000126870	7	158856578	158946189	+	WDR60-001	protein_coding	ENSG00000126870	WDR60	protein_coding	55112	E	ENST00000407559	6.7691	2.28696	18.7837	1.46413e-05	0.00155475	-
ENST00000372836	ENSG00000137161	6	42929200	42939287	+	CNPY3-001	protein_coding	ENSG00000137161	CNPY3	protein_coding	10695	E	ENST00000372836	8.95842	1.26393	18.7746	1.47117e-05	0.00155747	-
ENST00000320895	ENSG00000049656	5	1317744	1345099	-	CLPTM1L-001	protein_coding	ENSG00000049656	CLPTM1L	protein_coding	81037	E	ENST00000320895	7.72809	0.88805	18.762	1.48091e-05	0.00156301	-
ENST00000357121	ENSG00000122126	X	129540275	129592561	+	OCRL-002	protein_coding	ENSG00000122126	OCRL	protein_coding	4952	E	ENST00000357121	10.2144	2.73301	18.667	1.55651e-05	0.00163782	-
ENST00000375023	ENSG00000204301	6	32194843	32224067	-	NOTCH4-001	protein_coding	ENSG00000204301	NOTCH4	protein_coding	4855	E	ENST00000375023	10.9174	2.71917	18.6068	1.60646e-05	0.00168527	-
ENST00000342216	ENSG00000123143	19	14440260	14471866	+	PKN1-002	protein_coding	ENSG00000123143	PKN1	protein_coding	5585	E	ENST00000342216	11.7329	4.99216	18.5572	1.64881e-05	0.0017245	-
MSTRG.19475.2	NA	19	14147769	14206192	-	not_in_ref	not_in_ref	not_in_ref	not_in_ref	not_in_ref	no_EG	j	ENST00000340736	-12.3379	2.40682	18.5283	1.67398e-05	0.00174556	-
MSTRG.18956.7	NA	19	1876979	1881585	-	not_in_ref	not_in_ref	not_in_ref	not_in_ref	not_in_ref	no_EG	j	ENST00000250974	9.11408	3.76819	18.5103	1.68987e-05	0.00175133	-
MSTRG.3396.1	NA	1	205085632	205114955	-	not_in_ref	not_in_ref	not_in_ref	not_in_ref	not_in_ref	no_EG	j	ENST00000264515	-5.14486	1.66254	18.4981	1.70078e-05	0.00175133	-
ENST00000394801	ENSG00000109332	4	102795976	102827948	-	UBE2D3-004	protein_coding	ENSG00000109332	UBE2D3	protein_coding	7323	E	ENST00000394801	8.91377	3.16512	18.4973	1.70143e-05	0.00175133	-
ENST00000453003	ENSG00000204070	20	45363454	45366999	+	SYS1-003	protein_coding	ENSG00000204070	SYS1	protein_coding	90196	E	ENST00000453003	-10.2558	0.965674	18.4948	1.70364e-05	0.00175133	-
MSTRG.15345.35	NA	16	69311476	69325046	+	not_in_ref	not_in_ref	not_in_ref	not_in_ref	not_in_ref	no_EG	j	ENST00000254950	9.12282	2.40777	18.4936	1.70472e-05	0.00175133	-
ENST00000315658	ENSG00000115459	2	85354803	85391748	+	ELMOD3-001	protein_coding	ENSG00000115459	ELMOD3	protein_coding	84173	E	ENST00000315658	9.44707	2.31097	18.4461	1.74781e-05	0.00179029	-
ENST00000265620	ENSG00000087460	20	58891364	58911192	+	GNAS-035	protein_coding	ENSG00000087460	GNAS	protein_coding	2778	E	ENST00000265620	8.62263	3.79437	18.4396	1.75372e-05	0.00179106	-
ENST00000264449	ENSG00000124406	4	42408377	42657093	-	ATP8A1-003	protein_coding	ENSG00000124406	ATP8A1	protein_coding	10396	E	ENST00000264449	9.1154	0.220942	18.4189	1.77295e-05	0.0018007	-
MSTRG.28991.4	NA	4	5719252	5828975	+	not_in_ref	not_in_ref	not_in_ref	not_in_ref	not_in_ref	no_EG	j	ENST00000264956	9.00919	1.14486	18.4159	1.77572e-05	0.0018007	-
ENST00000509606	ENSG00000133835	5	119527158	119542332	+	HSD17B4-020	retained_intron	ENSG00000133835	HSD17B4	protein_coding	3295	noCuffcomp	noCuffcomp	9.22847	3.72647	18.4127	1.77871e-05	0.0018007	-
MSTRG.11745.10	NA	14	64073988	64226430	+	not_in_ref	not_in_ref	not_in_ref	not_in_ref	not_in_ref	no_EG	j	ENST00000358025	8.83982	0.74425	18.376	1.81323e-05	0.00183031	-
MSTRG.13328.2	NA	15	63143281	63157608	-	not_in_ref	not_in_ref	not_in_ref	not_in_ref	not_in_ref	no_EG	j	ENST00000330964	8.10063	-1.3124	18.3253	1.86215e-05	0.00186913	-
ENST00000452368	ENSG00000167526	16	89560683	89563952	+	RPL13-015	protein_coding	ENSG00000167526	RPL13	protein_coding	6137	E	ENST00000452368	-1.17953	0.623032	18.3249	1.86254e-05	0.00186913	-
ENST00000286777	ENSG00000156253	21	29005759	29019352	-	RWDD2B-002	processed_transcript	ENSG00000156253	RWDD2B	protein_coding	NA	E	ENST00000286777	8.52384	1.71003	18.3195	1.86784e-05	0.00186913	-
ENST00000428595	ENSG00000143569	1	154257071	154270564	+	UBAP2L-013	protein_coding	ENSG00000143569	UBAP2L	protein_coding	9898	noCuffcomp	noCuffcomp	-6.68232	1.51762	18.2881	1.89894e-05	0.00189479	-
MSTRG.9664.16	NA	12	109517855	109536700	+	not_in_ref	not_in_ref	not_in_ref	not_in_ref	not_in_ref	no_EG	j	ENST00000449510	-6.34964	2.21084	18.1815	2.00822e-05	0.00199248	-
MSTRG.39271.5	NA	9	91409045	91424358	-	not_in_ref	not_in_ref	not_in_ref	not_in_ref	not_in_ref	no_EG	j	ENST00000297689	14.2295	1.11968	18.1808	2.00889e-05	0.00199248	-
MSTRG.18466.2	NA	18	31621885	31684689	-	not_in_ref	not_in_ref	not_in_ref	not_in_ref	not_in_ref	no_EG	j	ENST00000306851	-6.65456	1.34491	18.176	2.01406e-05	0.00199248	-
ENST00000397011	ENSG00000106263	7	2354882	2380745	+	EIF3B-001	protein_coding	ENSG00000106263	EIF3B	protein_coding	8662	E	ENST00000397011	8.96797	2.8201	18.1634	2.02737e-05	0.00199996	-
MSTRG.24503.3	NA	20	37521363	37523690	+	not_in_ref	not_in_ref	not_in_ref	not_in_ref	not_in_ref	no_EG	j	ENST00000062104	8.70772	3.51617	18.129	2.06438e-05	0.00203032	-
MSTRG.3180.22	NA	1	183502288	183554186	+	not_in_ref	not_in_ref	not_in_ref	not_in_ref	not_in_ref	no_EG	j	ENST00000367537	-8.36549	1.99961	18.1239	2.06985e-05	0.00203032	-
ENST00000372977	ENSG00000137413	6	42050524	42083274	+	TAF8-004	protein_coding	ENSG00000137413	TAF8	protein_coding	129685	E	ENST00000372977	-5.75579	2.44139	18.0209	2.18491e-05	0.00213715	-
ENST00000556572	ENSG00000087303	14	52005455	52038952	-	NID2-004	protein_coding	ENSG00000087303	NID2	protein_coding	22795	noCuffcomp	noCuffcomp	-8.39502	-0.889502	17.9767	2.2362e-05	0.00218118	-
MSTRG.41518.3	NA	X	149477523	149532968	-	not_in_ref	not_in_ref	not_in_ref	not_in_ref	not_in_ref	no_EG	j	ENST00000618757	8.60107	0.353993	17.9538	2.26328e-05	0.0022014	-
MSTRG.32802.3	NA	6	14117809	14136896	+	not_in_ref	not_in_ref	not_in_ref	not_in_ref	not_in_ref	no_EG	j	ENST00000379153	9.58054	2.84845	17.9226	2.30076e-05	0.00223161	-
ENST00000460472	ENSG00000155657	2	178525989	178807423	-	TTN-003	protein_coding	ENSG00000155657	TTN	protein_coding	7273	E	ENST00000460472	8.7247	-0.885938	17.9011	2.32681e-05	0.00225059	-
ENST00000233379	ENSG00000115042	2	95402726	95416616	+	FAHD2A-001	protein_coding	ENSG00000115042	FAHD2A	protein_coding	51011	E	ENST00000233379	8.5333	0.834215	17.872	2.36275e-05	0.002279	-
MSTRG.1966.2	NA	1	110873183	110899898	+	not_in_ref	not_in_ref	not_in_ref	not_in_ref	not_in_ref	no_EG	j	ENST00000271324	8.61508	0.45272	17.8315	2.41358e-05	0.00231563	-
ENST00000216133	ENSG00000100307	22	39130772	39152650	-	CBX7-001	protein_coding	ENSG00000100307	CBX7	protein_coding	23492	E	ENST00000216133	-10.6784	1.351	17.8311	2.41406e-05	0.00231563	-
MSTRG.22249.2	NA	2	97083583	97094806	-	not_in_ref	not_in_ref	not_in_ref	not_in_ref	not_in_ref	no_EG	j	ENST00000414820	3.67803	-1.50422	17.8019	2.45132e-05	0.0023449	-
MSTRG.15345.14	NA	16	69139012	69169022	+	not_in_ref	not_in_ref	not_in_ref	not_in_ref	not_in_ref	no_EG	j	ENST00000314423	8.79781	2.18825	17.7735	2.48824e-05	0.00237367	-
MSTRG.7660.14	NA	11	118607677	118658025	+	not_in_ref	not_in_ref	not_in_ref	not_in_ref	not_in_ref	no_EG	j	ENST00000361417	7.34628	2.31539	17.7636	2.5013e-05	0.00237959	-
ENST00000479887	ENSG00000170356	7	144250045	144252957	-	OR2A20P-002	processed_transcript	ENSG00000170356	OR2A20P	transcribed_unprocessed_pseudogene	401428	E	ENST00000479887	9.03233	0.415712	17.7418	2.53011e-05	0.00240042	-
ENST00000221573	ENSG00000104976	19	7920316	7923250	+	SNAPC2-001	protein_coding	ENSG00000104976	SNAPC2	protein_coding	6618	E	ENST00000221573	8.12147	0.93782	17.7015	2.58422e-05	0.00244508	-
ENST00000370466	ENSG00000162645	1	89108000	89126114	-	GBP2-002	protein_coding	ENSG00000162645	GBP2	protein_coding	NA	E	ENST00000370466	6.96899	5.55732	17.6912	2.59831e-05	0.0024473	-
ENST00000232744	ENSG00000114626	3	127672940	127680917	+	ABTB1-001	protein_coding	ENSG00000114626	ABTB1	protein_coding	80325	E	ENST00000232744	8.73003	3.18588	17.6874	2.60343e-05	0.0024473	-
ENST00000620525	ENSG00000278050	11	65423638	65423742	+	NEAT1_2.1-201	misc_RNA	ENSG00000278050	NEAT1_2	misc_RNA	NA	noCuffcomp	noCuffcomp	-5.79034	0.053323	17.6824	2.61033e-05	0.0024473	-
MSTRG.28313.2	NA	3	160565916	160569248	+	not_in_ref	not_in_ref	not_in_ref	not_in_ref	not_in_ref	no_EG	j	ENST00000468527	8.63242	0.601382	17.6792	2.61476e-05	0.0024473	-
ENST00000513132	ENSG00000145349	4	113452961	113513842	-	CAMK2D-013	protein_coding	ENSG00000145349	CAMK2D	protein_coding	817	noCuffcomp	noCuffcomp	8.23078	1.83844	17.623	2.69311e-05	0.00250869	-
MSTRG.22448.2	NA	2	112055720	112119303	+	not_in_ref	not_in_ref	not_in_ref	not_in_ref	not_in_ref	no_EG	j	ENST00000283206	9.67116	2.11101	17.6218	2.6948e-05	0.00250869	-
ENST00000474495	ENSG00000135048	9	71697828	71704813	-	TMEM2-003	retained_intron	ENSG00000135048	TMEM2	protein_coding	23670	E	ENST00000474495	8.66913	0.229043	17.6037	2.72053e-05	0.00252588	-
MSTRG.21678.6	NA	2	55287856	55334345	-	not_in_ref	not_in_ref	not_in_ref	not_in_ref	not_in_ref	no_EG	j	ENST00000413716	9.28438	1.07067	17.5763	2.76004e-05	0.00255572	-
MSTRG.32296.16	NA	5	158695922	158701927	-	not_in_ref	not_in_ref	not_in_ref	not_in_ref	not_in_ref	no_EG	j	ENST00000518836	8.77108	6.00562	17.5376	2.81682e-05	0.00260136	-
MSTRG.32101.9	NA	5	146455062	146511937	+	not_in_ref	not_in_ref	not_in_ref	not_in_ref	not_in_ref	no_EG	j	ENST00000549332	5.11701	-1.02022	17.5103	2.85748e-05	0.00263192	-
MSTRG.15119.1	NA	16	56657694	56660877	+	not_in_ref	not_in_ref	not_in_ref	not_in_ref	not_in_ref	no_EG	j	ENST00000334350	10.0274	-0.0626343	17.4976	2.87677e-05	0.00264267	-
ENST00000300823	ENSG00000167380	19	44165104	44175429	+	ZNF226-003	protein_coding	ENSG00000167380	ZNF226	protein_coding	7769	E	ENST00000300823	8.92127	0.683587	17.4766	2.90862e-05	0.00266488	-
ENST00000262133	ENSG00000103479	16	53434420	53491649	+	RBL2-001	protein_coding	ENSG00000103479	RBL2	protein_coding	5934	E	ENST00000262133	8.97599	3.62711	17.4604	2.93354e-05	0.00268064	-
ENST00000396954	ENSG00000164172	5	53098062	53109759	-	MOCS2-001	protein_coding	ENSG00000164172	MOCS2	protein_coding	4338	E	ENST00000396954	9.05853	0.037725	17.406	3.0187e-05	0.00275122	-
ENST00000597512	ENSG00000130475	19	17762703	17788538	+	FCHO1-006	protein_coding	ENSG00000130475	FCHO1	protein_coding	23149	E	ENST00000597512	8.09613	-0.832526	17.3948	3.03654e-05	0.00275332	-
ENST00000437379	ENSG00000163517	3	13481246	13506407	+	HDAC11-017	protein_coding	ENSG00000163517	HDAC11	protein_coding	79885	noCuffcomp	noCuffcomp	9.04874	3.64575	17.3946	3.03686e-05	0.00275332	-
ENST00000456735	ENSG00000196712	17	31200536	31374433	+	NF1-003	protein_coding	ENSG00000196712	NF1	protein_coding	4763	E	ENST00000456735	6.29864	2.53712	17.3617	3.08986e-05	0.00279407	-
MSTRG.29065.2	NA	4	16160545	16213881	-	not_in_ref	not_in_ref	not_in_ref	not_in_ref	not_in_ref	no_EG	j	ENST00000405303	8.53123	2.87133	17.3539	3.10256e-05	0.00279827	-
ENST00000318560	ENSG00000097007	9	130835066	130887675	+	ABL1-001	protein_coding	ENSG00000097007	ABL1	protein_coding	25	E	ENST00000318560	9.13157	0.671208	17.3226	3.15416e-05	0.00283743	-
MSTRG.40288.10	NA	X	2691500	2741101	+	not_in_ref	not_in_ref	not_in_ref	not_in_ref	not_in_ref	no_EG	j	ENST00000611428	10.1452	0.245109	17.3108	3.17384e-05	0.00284777	-
ENST00000331302	ENSG00000181031	17	212502	352807	-	RPH3AL-001	protein_coding	ENSG00000181031	RPH3AL	protein_coding	9501	E	ENST00000331302	8.55579	2.43599	17.2739	3.23598e-05	0.00289604	-
ENST00000620651	ENSG00000196588	22	40410282	40436310	-	MKL1-205	protein_coding	ENSG00000196588	MKL1	protein_coding	57591	E	ENST00000620651	8.49554	1.12168	17.2519	3.27373e-05	0.00292229	-
MSTRG.6566.13	NA	11	61402733	61429920	-	not_in_ref	not_in_ref	not_in_ref	not_in_ref	not_in_ref	no_EG	j	ENST00000340437	10.2233	3.39833	17.2217	3.32613e-05	0.00296145	-
MSTRG.189.6	NA	1	5862834	5879387	-	not_in_ref	not_in_ref	not_in_ref	not_in_ref	not_in_ref	no_EG	j	ENST00000489180	8.30936	-0.379187	17.2053	3.35503e-05	0.00297954	-
MSTRG.19378.4	NA	19	12646513	12657365	-	not_in_ref	not_in_ref	not_in_ref	not_in_ref	not_in_ref	no_EG	j	ENST00000456935	-9.78004	2.99374	17.1985	3.36698e-05	0.00298253	-
ENST00000190983	ENSG00000064205	20	44715245	44727811	+	WISP2-001	protein_coding	ENSG00000064205	WISP2	protein_coding	8839	E	ENST00000190983	8.50456	2.03223	17.1555	3.44406e-05	0.00304128	-
ENST00000620927	ENSG00000278311	17	36586936	36589577	+	GGNBP2-009	retained_intron	ENSG00000278311	GGNBP2	protein_coding	79893	E	ENST00000620927	-11.5681	0.868042	17.1518	3.45083e-05	0.00304128	-
MSTRG.14666.8	NA	16	24750795	24826218	+	not_in_ref	not_in_ref	not_in_ref	not_in_ref	not_in_ref	no_EG	j	ENST00000395799	3.49123	1.34085	17.1369	3.478e-05	0.00305747	-
MSTRG.21205.8	NA	2	24564299	24770605	+	not_in_ref	not_in_ref	not_in_ref	not_in_ref	not_in_ref	no_EG	j	ENST00000405141	-5.40421	3.88947	17.0656	3.61105e-05	0.00316641	-
ENST00000511044	ENSG00000156453	5	141862885	141866202	-	PCDH1-004	processed_transcript	ENSG00000156453	PCDH1	protein_coding	5097	E	ENST00000511044	7.45953	0.514717	17.0165	3.70572e-05	0.00323537	-
ENST00000424948	ENSG00000234694	1	43354684	43358658	-	RP1-92O14.3-001	antisense	ENSG00000234694	RP1-92O14.3	antisense	NA	E	ENST00000424948	10.9264	-0.584941	17.0151	3.70832e-05	0.00323537	-
MSTRG.10136.8	NA	13	20973045	21061466	-	not_in_ref	not_in_ref	not_in_ref	not_in_ref	not_in_ref	no_EG	j	ENST00000382592	7.23892	2.65443	16.9812	3.77519e-05	0.00328546	-
ENST00000247178	ENSG00000126775	14	55366392	55411858	-	ATG14-001	protein_coding	ENSG00000126775	ATG14	protein_coding	22863	E	ENST00000247178	8.30787	2.19955	16.9204	3.89795e-05	0.00338381	-
ENST00000416695	ENSG00000188167	3	33090421	33096801	-	TMPPE-002	protein_coding	ENSG00000188167	TMPPE	protein_coding	643853	E	ENST00000416695	8.58126	-1.50186	16.9005	3.9391e-05	0.003411	-
MSTRG.28919.3	NA	4	3316068	3432148	+	not_in_ref	not_in_ref	not_in_ref	not_in_ref	not_in_ref	no_EG	j	ENST00000344733	8.306	2.22892	16.8366	4.07408e-05	0.00351911	-
MSTRG.86.7	NA	1	1311598	1323245	-	not_in_ref	not_in_ref	not_in_ref	not_in_ref	not_in_ref	no_EG	j	ENST00000540437	6.56225	2.01131	16.799	4.15557e-05	0.0035806	-
ENST00000512148	ENSG00000205403	4	109740724	109801985	-	CFI-001	protein_coding	ENSG00000205403	CFI	protein_coding	3426	E	ENST00000512148	12.0179	2.5415	16.7714	4.21646e-05	0.00362407	-
MSTRG.1926.13	NA	1	109656721	109661700	+	not_in_ref	not_in_ref	not_in_ref	not_in_ref	not_in_ref	no_EG	j	ENST00000369836	8.40872	1.79279	16.7497	4.26499e-05	0.00365673	-
ENST00000272902	ENSG00000144455	3	4361146	4467281	-	SUMF1-001	protein_coding	ENSG00000144455	SUMF1	protein_coding	285362	E	ENST00000272902	8.49787	2.04032	16.7352	4.29772e-05	0.00367571	-
MSTRG.21779.3	NA	2	63892118	63894636	-	not_in_ref	not_in_ref	not_in_ref	not_in_ref	not_in_ref	no_EG	j	ENST00000409558	8.25605	1.72122	16.7197	4.33297e-05	0.00368022	-
MSTRG.19899.11	NA	19	34365022	34400327	+	not_in_ref	not_in_ref	not_in_ref	not_in_ref	not_in_ref	no_EG	j	ENST00000588991	8.02427	5.91378	16.718	4.33678e-05	0.00368022	-
ENST00000398732	ENSG00000198155	4	218650	254841	+	ZNF876P-002	transcribed_unprocessed_pseudogene	ENSG00000198155	ZNF876P	transcribed_unprocessed_pseudogene	642280	E	ENST00000398732	8.53621	-1.92648	16.716	4.34124e-05	0.00368022	-
MSTRG.1579.8	NA	1	78620510	78664078	+	not_in_ref	not_in_ref	not_in_ref	not_in_ref	not_in_ref	no_EG	j	ENST00000370751	6.87576	1.70796	16.7142	4.34538e-05	0.00368022	-
MSTRG.33262.35	NA	6	31998851	32002664	+	not_in_ref	not_in_ref	not_in_ref	not_in_ref	not_in_ref	no_EG	j	ENST00000428956	7.13754	3.94892	16.707	4.36203e-05	0.00368533	-
MSTRG.11931.40	NA	14	75882719	76083766	+	not_in_ref	not_in_ref	not_in_ref	not_in_ref	not_in_ref	no_EG	j	ENST00000298832	-6.353	-0.452177	16.6981	4.38244e-05	0.00369359	-
MSTRG.3529.8	NA	1	211259553	211316000	+	not_in_ref	not_in_ref	not_in_ref	not_in_ref	not_in_ref	no_EG	j	ENST00000528926	-4.71683	1.38271	16.6767	4.43232e-05	0.00372658	-
MSTRG.23616.2	NA	2	218450265	218568181	-	not_in_ref	not_in_ref	not_in_ref	not_in_ref	not_in_ref	no_EG	j	ENST00000258399	9.29433	1.08869	16.5989	4.61766e-05	0.00387304	-
ENST00000509613	ENSG00000179304	X	52899383	52908560	+	FAM156B-004	protein_coding	ENSG00000179304	FAM156B	protein_coding	727866	E	ENST00000509613	9.1786	2.97915	16.5757	4.6745e-05	0.00391126	-
MSTRG.30275.5	NA	4	156761614	156971315	-	not_in_ref	not_in_ref	not_in_ref	not_in_ref	not_in_ref	no_EG	j	ENST00000506880	9.77305	3.609	16.5612	4.71059e-05	0.00393199	-
MSTRG.26784.26	NA	3	42193077	42212652	+	not_in_ref	not_in_ref	not_in_ref	not_in_ref	not_in_ref	no_EG	j	ENST00000487159	8.55059	1.88282	16.5448	4.75142e-05	0.00395655	-
MSTRG.26727.9	NA	3	38122719	38136658	-	not_in_ref	not_in_ref	not_in_ref	not_in_ref	not_in_ref	no_EG	j	ENST00000627515	6.37666	3.93284	16.5246	4.80231e-05	0.00398936	-
MSTRG.25135.12	NA	21	33230182	33266234	+	not_in_ref	not_in_ref	not_in_ref	not_in_ref	not_in_ref	no_EG	j	ENST00000382238	8.3813	-0.872536	16.4977	4.87101e-05	0.00403678	-
MSTRG.16291.2	NA	17	18327873	18363431	-	not_in_ref	not_in_ref	not_in_ref	not_in_ref	not_in_ref	no_EG	j	ENST00000316694	8.0445	2.21879	16.4602	4.96812e-05	0.00410745	-
MSTRG.11428.6	NA	14	50418521	50451459	-	not_in_ref	not_in_ref	not_in_ref	not_in_ref	not_in_ref	no_EG	j	ENST00000013125	5.94425	2.08858	16.4484	4.99914e-05	0.00412328	-
MSTRG.18945.11	NA	19	1576678	1592733	-	not_in_ref	not_in_ref	not_in_ref	not_in_ref	not_in_ref	no_EG	j	ENST00000156825	8.19292	0.680225	16.4416	5.0173e-05	0.00412846	-
ENST00000515655	ENSG00000118777	4	88090264	88231322	-	ABCG2-002	protein_coding	ENSG00000118777	ABCG2	protein_coding	9429	E	ENST00000515655	10.2062	-0.819562	16.3791	5.18551e-05	0.00425677	-
MSTRG.32677.11	NA	6	3118799	3153649	+	not_in_ref	not_in_ref	not_in_ref	not_in_ref	not_in_ref	no_EG	j	ENST00000430655	9.03773	2.15967	16.3733	5.20135e-05	0.00425971	-
MSTRG.37007.7	NA	8	17643802	17676414	-	not_in_ref	not_in_ref	not_in_ref	not_in_ref	not_in_ref	no_EG	j	ENST00000262102	8.1091	2.26564	16.3644	5.22566e-05	0.00426955	-
ENST00000278071	ENSG00000148841	10	104309698	104333905	-	ITPRIP-201	protein_coding	ENSG00000148841	ITPRIP	protein_coding	85450	E	ENST00000278071	7.52347	-0.65734	16.3412	5.29007e-05	0.00431202	-
ENST00000566269	ENSG00000102854	16	765732	768798	+	MSLN-005	protein_coding	ENSG00000102854	MSLN	protein_coding	10232	E	ENST00000566269	12.6013	1.37814	16.3087	5.38155e-05	0.00437632	-
MSTRG.21708.21	NA	2	61145130	61164830	+	not_in_ref	not_in_ref	not_in_ref	not_in_ref	not_in_ref	no_EG	j	ENST00000462959	-10.3219	0.994613	16.3014	5.40234e-05	0.00438296	-
ENST00000409652	ENSG00000221963	22	35648395	35668409	+	APOL6-001	protein_coding	ENSG00000221963	APOL6	protein_coding	80830	E	ENST00000409652	6.17089	7.69027	16.264	5.51021e-05	0.00446006	-
ENST00000518979	ENSG00000105483	19	48209644	48249668	-	CARD8-014	nonsense_mediated_decay	ENSG00000105483	CARD8	protein_coding	22900	E	ENST00000518979	8.05422	1.11174	16.2361	5.5917e-05	0.00451075	-
MSTRG.17673.1	NA	17	65528563	65560296	-	not_in_ref	not_in_ref	not_in_ref	not_in_ref	not_in_ref	no_EG	j	ENST00000307078	8.52238	0.872551	16.2337	5.59881e-05	0.00451075	-
ENST00000535306	ENSG00000181481	17	30971060	30999911	+	RNF135-007	protein_coding	ENSG00000181481	RNF135	protein_coding	84282	E	ENST00000535306	8.00612	1.16172	16.229	5.61296e-05	0.00451167	-
MSTRG.16987.3	NA	17	42536523	42544505	+	not_in_ref	not_in_ref	not_in_ref	not_in_ref	not_in_ref	no_EG	j	ENST00000225927	8.0856	2.07069	16.2134	5.65917e-05	0.00453832	-
MSTRG.22576.13	NA	2	127048038	127107193	-	not_in_ref	not_in_ref	not_in_ref	not_in_ref	not_in_ref	no_EG	j	ENST00000316724	7.95967	0.6085	16.1976	5.70654e-05	0.00456576	-
ENST00000452621	ENSG00000117625	1	211259388	211313298	+	RCOR3-007	protein_coding	ENSG00000117625	RCOR3	protein_coding	55758	E	ENST00000452621	8.06554	0.674916	16.1719	5.78445e-05	0.00461746	-
MSTRG.34562.2	NA	6	158109522	158130481	-	not_in_ref	not_in_ref	not_in_ref	not_in_ref	not_in_ref	no_EG	j	ENST00000607071	7.18029	0.670137	16.1604	5.81977e-05	0.004635	-
ENST00000606722	ENSG00000186010	19	19516261	19528195	+	NDUFA13-010	nonsense_mediated_decay	ENSG00000186010	NDUFA13	protein_coding	NA	E	ENST00000606722	8.31019	1.62185	16.1521	5.84536e-05	0.00463731	-
MSTRG.13407.37	NA	15	65659261	65761415	-	not_in_ref	not_in_ref	not_in_ref	not_in_ref	not_in_ref	no_EG	j	ENST00000443035	6.60026	0.548638	16.1508	5.84939e-05	0.00463731	-
MSTRG.329.15	NA	1	12006535	12013506	+	not_in_ref	not_in_ref	not_in_ref	not_in_ref	not_in_ref	no_EG	j	ENST00000235329	6.83157	4.30151	16.1433	5.87245e-05	0.00464499	-
ENST00000369486	ENSG00000143061	1	116574409	116667753	-	IGSF3-001	protein_coding	ENSG00000143061	IGSF3	protein_coding	3321	E	ENST00000369486	8.11069	0.0379257	16.116	5.95796e-05	0.00470191	-
ENST00000507873	ENSG00000075539	4	48497541	48557705	-	FRYL-002	protein_coding	ENSG00000075539	FRYL	protein_coding	285527	noCuffcomp	noCuffcomp	-5.18195	2.25824	16.0828	6.06307e-05	0.00477402	-
ENST00000618804	ENSG00000148541	10	59246129	59362550	-	FAM13C-001	protein_coding	ENSG00000148541	FAM13C	protein_coding	220965	E	ENST00000618804	8.33735	1.87014	16.0726	6.09589e-05	0.00478166	-
MSTRG.18945.2	NA	19	1573819	1583268	-	not_in_ref	not_in_ref	not_in_ref	not_in_ref	not_in_ref	no_EG	j	ENST00000156825	-4.46675	1.09577	16.0712	6.10032e-05	0.00478166	-
ENST00000374907	ENSG00000138448	2	186590080	186680897	+	ITGAV-003	protein_coding	ENSG00000138448	ITGAV	protein_coding	3685	E	ENST00000374907	9.38722	5.02448	16.0653	6.1194e-05	0.00478581	-
ENST00000317151	ENSG00000114923	2	219627661	219641980	+	SLC4A3-002	protein_coding	ENSG00000114923	SLC4A3	protein_coding	6508	E	ENST00000317151	-10.5448	0.980919	16.0572	6.14562e-05	0.00479552	-
ENST00000259632	ENSG00000137100	9	34613551	34620480	-	DCTN3-008	protein_coding	ENSG00000137100	DCTN3	protein_coding	11258	E	ENST00000259632	9.33128	2.33923	16.018	6.27436e-05	0.00488499	-
ENST00000320631	ENSG00000110047	11	64851642	64878719	-	EHD1-001	protein_coding	ENSG00000110047	EHD1	protein_coding	10938	E	ENST00000320631	6.45655	1.05603	16.003	6.32409e-05	0.00491158	-
ENST00000376568	ENSG00000204580	6	30884458	30900153	+	DDR1-002	protein_coding	ENSG00000204580	DDR1	protein_coding	780	E	ENST00000376568	7.01485	1.61038	15.9992	6.3368e-05	0.00491158	-
MSTRG.7409.20	NA	11	100936202	100993941	+	not_in_ref	not_in_ref	not_in_ref	not_in_ref	not_in_ref	no_EG	j	ENST00000298815	8.50024	3.01968	15.967	6.44547e-05	0.00498155	-
MSTRG.39016.36	NA	9	63127334	63151556	+	not_in_ref	not_in_ref	not_in_ref	not_in_ref	not_in_ref	no_EG	o	ENST00000447083	9.03888	0.547654	15.964	6.45576e-05	0.00498155	-
ENST00000265981	ENSG00000110315	11	10511678	10541217	-	RNF141-001	protein_coding	ENSG00000110315	RNF141	protein_coding	50862	E	ENST00000265981	9.81806	3.1561	15.9331	6.56215e-05	0.00505242	-
ENST00000565574	ENSG00000257017	16	72054629	72061009	+	HP-003	protein_coding	ENSG00000257017	HP	protein_coding	3240	E	ENST00000565574	9.89362	3.69539	15.9097	6.64373e-05	0.00510392	-
ENST00000482865	ENSG00000198836	3	193648766	193659514	+	OPA1-014	retained_intron	ENSG00000198836	OPA1	protein_coding	4976	E	ENST00000482865	8.19682	-0.0733035	15.8723	6.77644e-05	0.00519437	-
ENST00000543458	ENSG00000124155	20	45416144	45426244	+	PIGT-007	protein_coding	ENSG00000124155	PIGT	protein_coding	51604	E	ENST00000543458	-10.392	3.83023	15.8467	6.86849e-05	0.00525334	-
ENST00000349129	ENSG00000083097	6	83067666	83168719	+	DOPEY1-002	protein_coding	ENSG00000083097	DOPEY1	protein_coding	23033	noCuffcomp	noCuffcomp	4.3686	0.803558	15.8186	6.97122e-05	0.00532019	-
ENST00000511473	ENSG00000204628	5	181236909	181243916	-	GNB2L1-006	nonsense_mediated_decay	ENSG00000204628	GNB2L1	protein_coding	10399	E	ENST00000511473	9.47597	3.03639	15.806	7.01814e-05	0.00534425	-
MSTRG.25336.13	NA	21	44885958	44898571	-	not_in_ref	not_in_ref	not_in_ref	not_in_ref	not_in_ref	no_EG	j	ENST00000397850	-7.44256	1.97133	15.8015	7.03478e-05	0.00534428	-
MSTRG.38755.6	NA	9	32403885	32454769	+	not_in_ref	not_in_ref	not_in_ref	not_in_ref	not_in_ref	no_EG	j	ENST00000541043	8.1927	2.31386	15.7977	7.04896e-05	0.00534428	-
ENST00000355264	ENSG00000185009	10	74120255	74151063	-	AP3M1-001	protein_coding	ENSG00000185009	AP3M1	protein_coding	26985	E	ENST00000355264	-6.20902	1.91239	15.7864	7.09106e-05	0.00536449	-
MSTRG.33105.9	NA	6	29929317	29945875	+	not_in_ref	not_in_ref	not_in_ref	not_in_ref	not_in_ref	no_EG	o	ENST00000396634	7.65204	1.76541	15.7722	7.14437e-05	0.00539307	-
MSTRG.24454.6	NA	20	35626044	35664783	-	not_in_ref	not_in_ref	not_in_ref	not_in_ref	not_in_ref	no_EG	j	ENST00000352393	4.36479	-0.0248049	15.7637	7.17666e-05	0.00540569	-
ENST00000584985	ENSG00000126351	17	40062810	40093867	+	THRA-005	protein_coding	ENSG00000126351	THRA	protein_coding	7067	E	ENST00000584985	-5.22581	1.05821	15.705	7.40297e-05	0.00556408	-
ENST00000262861	ENSG00000116991	1	232397968	232515566	-	SIPA1L2-201	protein_coding	ENSG00000116991	SIPA1L2	protein_coding	57568	noCuffcomp	noCuffcomp	-8.05298	3.90183	15.6857	7.47862e-05	0.00559948	-
MSTRG.11279.10	NA	14	34753234	34875291	-	not_in_ref	not_in_ref	not_in_ref	not_in_ref	not_in_ref	no_EG	j	ENST00000360310	3.64874	3.15947	15.6848	7.48232e-05	0.00559948	-
MSTRG.16021.6	NA	17	7497781	7514609	+	not_in_ref	not_in_ref	not_in_ref	not_in_ref	not_in_ref	no_EG	j	ENST00000617998	9.48157	2.87965	15.661	7.57711e-05	0.00565823	-
ENST00000522167	ENSG00000136960	8	119557409	119593008	-	ENPP2-005	protein_coding	ENSG00000136960	ENPP2	protein_coding	5168	E	ENST00000522167	16.1067	0.0796458	15.6409	7.6579e-05	0.00569253	-
MSTRG.32932.4	NA	6	26124208	26139084	+	not_in_ref	not_in_ref	not_in_ref	not_in_ref	not_in_ref	no_EG	j	ENST00000314088	-8.49539	1.07721	15.6396	7.66327e-05	0.00569253	-
ENST00000481477	ENSG00000185917	21	36034541	36060385	-	SETD4-002	processed_transcript	ENSG00000185917	SETD4	protein_coding	54093	E	ENST00000481477	8.2069	0.973679	15.6374	7.67222e-05	0.00569253	-
ENST00000564495	ENSG00000261279	15	32406597	32434637	-	ULK4P1-004	retained_intron	ENSG00000261279	ULK4P1	transcribed_unprocessed_pseudogene	89838	E	ENST00000564495	8.44119	1.91114	15.6295	7.70418e-05	0.00570405	-
ENST00000404032	ENSG00000119777	2	27032977	27041693	+	TMEM214-002	protein_coding	ENSG00000119777	TMEM214	protein_coding	54867	E	ENST00000404032	8.79661	2.71895	15.6027	7.81447e-05	0.0057734	-
ENST00000588595	ENSG00000198258	19	9827918	9828805	+	UBL5-007	retained_intron	ENSG00000198258	UBL5	protein_coding	59286	E	ENST00000588595	-4.40784	0.034519	15.5935	7.85254e-05	0.00578921	-
ENST00000251303	ENSG00000132207	16	30193917	30197561	+	SLX1A-001	protein_coding	ENSG00000132207	SLX1A	protein_coding	548593	E	ENST00000251303	7.93449	2.13037	15.5886	7.87273e-05	0.0057918	-
MSTRG.13453.2	NA	15	68778907	68817615	-	not_in_ref	not_in_ref	not_in_ref	not_in_ref	not_in_ref	no_EG	j	ENST00000465139	8.19187	4.09458	15.5721	7.94162e-05	0.00583012	-
ENST00000371469	ENSG00000138207	10	93591889	93601744	-	RBP4-002	protein_coding	ENSG00000138207	RBP4	protein_coding	5950	E	ENST00000371469	6.73938	4.0572	15.5593	7.99585e-05	0.00585755	-
MSTRG.23101.7	NA	2	178431976	178451381	-	not_in_ref	not_in_ref	not_in_ref	not_in_ref	not_in_ref	no_EG	j	ENST00000424699	-4.39809	2.09343	15.5417	8.07067e-05	0.0058961	-
ENST00000556422	ENSG00000070269	14	56579620	56649515	+	TMEM260-002	nonsense_mediated_decay	ENSG00000070269	TMEM260	protein_coding	54916	E	ENST00000556422	8.55241	1.05078	15.5389	8.08243e-05	0.0058961	-
ENST00000591935	ENSG00000099622	19	1267229	1274480	+	CIRBP-020	protein_coding	ENSG00000099622	CIRBP	protein_coding	1153	E	ENST00000591935	6.54481	0.0172231	15.5316	8.1136e-05	0.00590643	-
ENST00000415352	ENSG00000167792	11	67606944	67612535	+	NDUFV1-002	protein_coding	ENSG00000167792	NDUFV1	protein_coding	4723	E	ENST00000415352	7.04995	5.0417	15.5018	8.24283e-05	0.00596966	-
ENST00000344450	ENSG00000112679	6	292097	351355	+	DUSP22-001	protein_coding	ENSG00000112679	DUSP22	protein_coding	56940	E	ENST00000344450	8.89736	1.04895	15.5015	8.24411e-05	0.00596966	-
ENST00000377043	ENSG00000135048	9	71704417	71712154	-	TMEM2-005	protein_coding	ENSG00000135048	TMEM2	protein_coding	23670	E	ENST00000377043	8.33563	-1.09362	15.4997	8.25203e-05	0.00596966	-
MSTRG.707.5	NA	1	27970389	28058077	-	not_in_ref	not_in_ref	not_in_ref	not_in_ref	not_in_ref	no_EG	j	ENST00000373871	9.37803	1.68782	15.4832	8.32427e-05	0.0060094	-
ENST00000302632	ENSG00000169313	3	151337380	151384812	-	P2RY12-001	protein_coding	ENSG00000169313	P2RY12	protein_coding	NA	E	ENST00000302632	8.47725	0.677518	15.4638	8.40985e-05	0.00604759	-
MSTRG.12168.5	NA	14	99774013	99942048	+	not_in_ref	not_in_ref	not_in_ref	not_in_ref	not_in_ref	no_EG	j	ENST00000334192	9.36187	2.35641	15.4634	8.412e-05	0.00604759	-
ENST00000367697	ENSG00000051620	6	138404247	138413173	+	HEBP2-003	protein_coding	ENSG00000051620	HEBP2	protein_coding	NA	E	ENST00000367697	8.06468	3.66074	15.4493	8.47473e-05	0.00608009	-
MSTRG.39705.4	NA	9	120388913	120392866	-	not_in_ref	not_in_ref	not_in_ref	not_in_ref	not_in_ref	no_EG	j	ENST00000473282	-4.45898	0.293288	15.4288	8.56746e-05	0.00613395	-
ENST00000372955	ENSG00000138286	10	73177872	73235452	+	FAM149B1-003	protein_coding	ENSG00000138286	FAM149B1	protein_coding	NA	E	ENST00000372955	10.0676	-0.00556979	15.4204	8.60525e-05	0.00614833	-
MSTRG.2631.1	NA	1	155195588	155204952	-	not_in_ref	not_in_ref	not_in_ref	not_in_ref	not_in_ref	no_EG	j	ENST00000368378	9.95315	0.916061	15.3948	8.72257e-05	0.00621936	-
MSTRG.17868.9	NA	17	75898644	75917761	-	not_in_ref	not_in_ref	not_in_ref	not_in_ref	not_in_ref	no_EG	j	ENST00000593156	8.73103	0.982452	15.3847	8.76947e-05	0.00623998	-
ENST00000550333	ENSG00000133641	12	88035505	88050158	+	C12orf29-003	nonsense_mediated_decay	ENSG00000133641	C12orf29	protein_coding	91298	E	ENST00000550333	7.17402	2.51554	15.3606	8.8819e-05	0.00630706	-
ENST00000446198	ENSG00000128567	7	131500262	131556563	-	PODXL-003	nonsense_mediated_decay	ENSG00000128567	PODXL	protein_coding	NA	E	ENST00000446198	8.23947	0.982607	15.3461	8.95068e-05	0.00634292	-
MSTRG.1055.33	NA	1	43602006	43622283	+	not_in_ref	not_in_ref	not_in_ref	not_in_ref	not_in_ref	no_EG	j	ENST00000359947	6.56626	2.25567	15.3336	9.01005e-05	0.006372	-
ENST00000389698	ENSG00000174373	14	35538352	35809226	-	RALGAPA1-002	protein_coding	ENSG00000174373	RALGAPA1	protein_coding	253959	E	ENST00000389698	8.39368	1.38062	15.2882	9.22929e-05	0.00651377	-
ENST00000456150	ENSG00000114646	3	47562239	47578133	-	CSPG5-003	protein_coding	ENSG00000114646	CSPG5	protein_coding	10675	E	ENST00000456150	8.43364	0.364624	15.2543	9.39628e-05	0.00661819	-
ENST00000448244	ENSG00000055950	10	100981376	100987433	-	MRPL43-009	protein_coding	ENSG00000055950	MRPL43	protein_coding	84545	E	ENST00000448244	-6.43763	1.22407	15.2473	9.43102e-05	0.00662921	-
ENST00000215790	ENSG00000099992	22	30291990	30327046	-	TBC1D10A-001	protein_coding	ENSG00000099992	TBC1D10A	protein_coding	83874	E	ENST00000215790	8.0156	1.46733	15.2355	9.49032e-05	0.00665741	-
MSTRG.25231.9	NA	21	38380046	38449105	-	not_in_ref	not_in_ref	not_in_ref	not_in_ref	not_in_ref	no_EG	j	ENST00000417133	9.44704	2.27935	15.2241	9.54762e-05	0.0066841	-
MSTRG.7212.5	NA	11	82973137	83034772	-	not_in_ref	not_in_ref	not_in_ref	not_in_ref	not_in_ref	no_EG	j	ENST00000533486	8.26179	2.92477	15.2112	9.61331e-05	0.00671655	-
MSTRG.4260.2	NA	10	17644195	17715854	+	not_in_ref	not_in_ref	not_in_ref	not_in_ref	not_in_ref	no_EG	j	ENST00000377524	11.9976	2.21265	15.185	9.74772e-05	0.00679678	-
ENST00000472326	ENSG00000127990	7	94585470	94599137	-	SGCE-010	retained_intron	ENSG00000127990	SGCE	protein_coding	8910	E	ENST00000472326	-6.2157	-0.00177652	15.1788	9.7796e-05	0.00680535	-
MSTRG.27037.26	NA	3	50290181	50291847	-	not_in_ref	not_in_ref	not_in_ref	not_in_ref	not_in_ref	no_EG	j	ENST00000436390	8.01058	-1.11518	15.1749	9.8e-05	0.0068059	-
ENST00000549311	ENSG00000111077	12	53050051	53064372	+	TNS2-004	retained_intron	ENSG00000111077	TNS2	protein_coding	23371	E	ENST00000549311	6.94243	2.30071	15.16	9.87723e-05	0.00684584	-
ENST00000353598	ENSG00000181991	15	88467718	88478259	+	MRPS11-002	protein_coding	ENSG00000181991	MRPS11	protein_coding	NA	E	ENST00000353598	9.21161	1.09749	15.1338	0.000100154	0.0069278	-
ENST00000591968	ENSG00000124299	19	33386955	33395148	-	PEPD-013	processed_transcript	ENSG00000124299	PEPD	protein_coding	5184	E	ENST00000591968	7.99042	3.24089	15.1235	0.000100703	0.00695193	-
MSTRG.35184.3	NA	7	36153351	36299725	+	not_in_ref	not_in_ref	not_in_ref	not_in_ref	not_in_ref	no_EG	j	ENST00000534978	7.04439	1.43643	15.1129	0.00010127	0.00697716	-
ENST00000585393	ENSG00000070540	17	68421486	68427175	-	WIPI1-011	protein_coding	ENSG00000070540	WIPI1	protein_coding	55062	E	ENST00000585393	8.5244	0.537421	15.1015	0.000101881	0.00700536	-
MSTRG.27161.12	NA	3	56623117	56683178	-	not_in_ref	not_in_ref	not_in_ref	not_in_ref	not_in_ref	no_EG	j	ENST00000493960	9.0033	0.442584	15.0851	0.000102771	0.00705258	-
ENST00000224807	ENSG00000107819	10	101031239	101041240	+	SFXN3-201	protein_coding	ENSG00000107819	SFXN3	protein_coding	81855	noCuffcomp	noCuffcomp	5.97868	3.21501	15.0564	0.000104347	0.00714066	-
ENST00000408905	ENSG00000141376	17	60679458	61392831	+	BCAS3-013	protein_coding	ENSG00000141376	BCAS3	protein_coding	54828	E	ENST00000408905	-1.21664	0.806571	15.0542	0.000104465	0.00714066	-
ENST00000370491	ENSG00000137944	1	88935773	88992776	-	CCBL2-001	protein_coding	ENSG00000137944	CCBL2	protein_coding	56267	E	ENST00000370491	8.01978	1.87201	15.0474	0.000104847	0.00715267	-
ENST00000460612	ENSG00000121310	1	52896223	52921762	-	ECHDC2-005	retained_intron	ENSG00000121310	ECHDC2	protein_coding	55268	E	ENST00000460612	-7.31035	-0.091394	14.9784	0.000108752	0.0074045	-
ENST00000559608	ENSG00000140332	15	70049801	70051505	-	TLE3-029	retained_intron	ENSG00000140332	TLE3	protein_coding	7090	E	ENST00000559608	7.83637	-0.151189	14.9623	0.000109679	0.00745303	-
MSTRG.40871.9	NA	X	68506235	68537266	+	not_in_ref	not_in_ref	not_in_ref	not_in_ref	not_in_ref	no_EG	j	ENST00000462683	6.53224	3.2386	14.9198	0.000112182	0.0076082	-
MSTRG.19705.3	NA	19	19757430	19821716	-	not_in_ref	not_in_ref	not_in_ref	not_in_ref	not_in_ref	no_EG	j	ENST00000591639	-7.50173	0.12925	14.9026	0.000113206	0.00764253	-
ENST00000508500	ENSG00000160789	1	156136087	156139171	+	LMNA-020	protein_coding	ENSG00000160789	LMNA	protein_coding	4000	noCuffcomp	noCuffcomp	10.01	3.51454	14.9013	0.000113287	0.00764253	-
MSTRG.8950.24	NA	12	55720489	55724606	+	not_in_ref	not_in_ref	not_in_ref	not_in_ref	not_in_ref	no_EG	j	ENST00000257895	10.94	2.62193	14.9002	0.000113348	0.00764253	-
ENST00000460856	ENSG00000160145	3	124094681	124519849	+	KALRN-013	protein_coding	ENSG00000160145	KALRN	protein_coding	8997	E	ENST00000460856	7.70751	0.379653	14.884	0.000114326	0.00769352	-
ENST00000221480	ENSG00000104883	19	7476875	7489019	-	PEX11G-001	protein_coding	ENSG00000104883	PEX11G	protein_coding	92960	E	ENST00000221480	8.79894	0.996628	14.871	0.000115117	0.00773176	-
ENST00000369977	ENSG00000196586	6	75749332	75916612	+	MYO6-002	protein_coding	ENSG00000196586	MYO6	protein_coding	4646	E	ENST00000369977	10.6762	1.10492	14.8631	0.000115602	0.0077488	-
ENST00000594523	ENSG00000160014	19	46601366	46609182	+	CALM3-015	protein_coding	ENSG00000160014	CALM3	protein_coding	808	E	ENST00000594523	7.78941	1.17888	14.8596	0.000115817	0.0077488	-
MSTRG.15698.7	NA	16	88715346	88720387	-	not_in_ref	not_in_ref	not_in_ref	not_in_ref	not_in_ref	no_EG	j	ENST00000301015	9.42614	3.25759	14.8434	0.000116819	0.00780083	-
ENST00000522566	ENSG00000164930	8	103298433	103332817	+	FZD6-001	protein_coding	ENSG00000164930	FZD6	protein_coding	8323	E	ENST00000522566	7.60416	1.08522	14.8372	0.0001172	0.0078112	-
ENST00000326005	ENSG00000180304	15	64687573	64703281	-	OAZ2-001	protein_coding	ENSG00000180304	OAZ2	protein_coding	4947	E	ENST00000326005	4.47111	0.896635	14.8299	0.000117657	0.00782664	-
ENST00000599748	ENSG00000063176	19	48624952	48630405	+	SPHK2-009	protein_coding	ENSG00000063176	SPHK2	protein_coding	56848	E	ENST00000599748	8.23916	2.0578	14.8233	0.000118065	0.00783878	-
MSTRG.4856.11	NA	10	72096522	72204449	-	not_in_ref	not_in_ref	not_in_ref	not_in_ref	not_in_ref	no_EG	j	ENST00000342444	-9.76474	1.08075	14.8031	0.000119339	0.00790828	-
MSTRG.4220.1	NA	10	13643706	13891251	-	not_in_ref	not_in_ref	not_in_ref	not_in_ref	not_in_ref	no_EG	j	ENST00000357447	7.72463	2.08221	14.7705	0.000121417	0.00803065	-
MSTRG.999.23	NA	1	40712786	40771603	+	not_in_ref	not_in_ref	not_in_ref	not_in_ref	not_in_ref	no_EG	j	ENST00000372653	-5.84762	1.86674	14.7123	0.000125229	0.00826701	-
ENST00000573763	ENSG00000132386	17	1771719	1777209	+	SERPINF1-012	protein_coding	ENSG00000132386	SERPINF1	protein_coding	5176	E	ENST00000573763	8.36417	-1.89108	14.6915	0.000126618	0.00832413	-
ENST00000277165	ENSG00000048828	9	93451722	93566107	+	FAM120A-004	protein_coding	ENSG00000048828	FAM120A	protein_coding	23196	E	ENST00000277165	9.12591	4.52373	14.6897	0.000126739	0.00832413	-
MSTRG.16217.4	NA	17	16342534	16353445	-	not_in_ref	not_in_ref	not_in_ref	not_in_ref	not_in_ref	no_EG	j	ENST00000476243	7.95566	-0.961961	14.6886	0.000126813	0.00832413	-
ENST00000261789	ENSG00000100926	14	24189143	24195687	-	TM9SF1-002	protein_coding	ENSG00000100926	TM9SF1	protein_coding	10548	noCuffcomp	noCuffcomp	6.66519	1.35657	14.6783	0.000127505	0.00833888	-
MSTRG.12660.9	NA	15	32517398	32533741	-	not_in_ref	not_in_ref	not_in_ref	not_in_ref	not_in_ref	no_EG	j	ENST00000454486	7.70966	0.904532	14.6781	0.000127518	0.00833888	-
ENST00000390237	ENSG00000211592	2	88857161	88857683	-	IGKC-001	IG_C_gene	ENSG00000211592	IGKC	IG_C_gene	NA	E	ENST00000390237	-9.00283	5.14349	14.6489	0.00012951	0.00845323	-
MSTRG.16362.7	NA	17	19904588	19947475	-	not_in_ref	not_in_ref	not_in_ref	not_in_ref	not_in_ref	no_EG	j	ENST00000225737	7.87526	0.462013	14.6315	0.000130712	0.00851566	-
ENST00000421471	ENSG00000112118	6	52264621	52273775	-	MCM3-004	protein_coding	ENSG00000112118	MCM3	protein_coding	4172	E	ENST00000421471	8.20909	-0.582193	14.6266	0.000131051	0.00852173	-
MSTRG.34699.35	NA	6	167951949	167972010	+	not_in_ref	not_in_ref	not_in_ref	not_in_ref	not_in_ref	no_EG	j	ENST00000400822	7.59702	1.44771	14.6182	0.000131639	0.00854398	-
MSTRG.33742.16	NA	6	73466263	73501096	+	not_in_ref	not_in_ref	not_in_ref	not_in_ref	not_in_ref	no_EG	j	ENST00000370300	-1.65227	-0.847937	14.5962	0.000133183	0.00862808	-
MSTRG.1685.3	NA	1	89102980	89147569	-	not_in_ref	not_in_ref	not_in_ref	not_in_ref	not_in_ref	no_EG	j	ENST00000464839	8.81544	2.33148	14.5791	0.0001344	0.00869068	-
ENST00000572514	ENSG00000120705	5	138512772	138543216	-	ETF1-009	protein_coding	ENSG00000120705	ETF1	protein_coding	2107	E	ENST00000572514	7.69922	-1.14277	14.5641	0.00013547	0.00874358	-
ENST00000397260	ENSG00000092096	14	23346314	23352860	-	SLC22A17-005	protein_coding	ENSG00000092096	SLC22A17	protein_coding	51310	E	ENST00000397260	8.00749	0.230227	14.47	0.000142408	0.00916876	-
MSTRG.15476.5	NA	16	75111896	75115592	-	not_in_ref	not_in_ref	not_in_ref	not_in_ref	not_in_ref	no_EG	j	ENST00000300051	8.16149	4.42534	14.4677	0.000142585	0.00916876	-
ENST00000396738	ENSG00000115661	2	219245479	219248892	+	STK16-004	protein_coding	ENSG00000115661	STK16	protein_coding	8576	E	ENST00000396738	9.14244	0.987348	14.4283	0.0001456	0.00933319	-
ENST00000267842	ENSG00000140284	15	50182196	50236395	+	SLC27A2-001	protein_coding	ENSG00000140284	SLC27A2	protein_coding	11001	E	ENST00000267842	8.25526	3.37058	14.4272	0.00014568	0.00933319	-
MSTRG.13841.11	NA	15	89664372	89678309	-	not_in_ref	not_in_ref	not_in_ref	not_in_ref	not_in_ref	no_EG	j	ENST00000300055	9.49317	4.24364	14.3939	0.000148282	0.0094824	-
MSTRG.33478.5	NA	6	41789974	41840959	-	not_in_ref	not_in_ref	not_in_ref	not_in_ref	not_in_ref	no_EG	j	ENST00000373010	5.72125	0.743691	14.3849	0.00014899	0.00950751	-
MSTRG.21276.11	NA	2	27236782	27243786	+	not_in_ref	not_in_ref	not_in_ref	not_in_ref	not_in_ref	no_EG	j	ENST00000264705	-6.8532	1.27874	14.382	0.000149222	0.00950751	-
ENST00000257724	ENSG00000135272	7	114922154	115019202	+	MDFIC-007	protein_coding	ENSG00000135272	MDFIC	protein_coding	29969	noCuffcomp	noCuffcomp	5.8318	4.60039	14.3597	0.000151001	0.00959222	-
ENST00000354869	ENSG00000079974	22	50767504	50783621	-	RABL2B-007	protein_coding	ENSG00000079974	RABL2B	protein_coding	11158	E	ENST00000354869	9.64322	1.44647	14.3584	0.000151104	0.00959222	-
MSTRG.26697.14	NA	3	36993609	37050828	+	not_in_ref	not_in_ref	not_in_ref	not_in_ref	not_in_ref	no_EG	j	ENST00000458205	10.2298	1.11928	14.2924	0.000156499	0.00991658	-
MSTRG.9045.9	NA	12	57745039	57748218	+	not_in_ref	not_in_ref	not_in_ref	not_in_ref	not_in_ref	no_EG	j	ENST00000257910	6.49435	1.67214	14.2353	0.000161316	0.0102031	-
MSTRG.38518.6	NA	9	4834156	4928129	+	not_in_ref	not_in_ref	not_in_ref	not_in_ref	not_in_ref	no_EG	j	ENST00000381750	-4.75045	2.45267	14.227	0.00016203	0.0102297	-
MSTRG.5773.1	NA	11	1732069	1759051	-	not_in_ref	not_in_ref	not_in_ref	not_in_ref	not_in_ref	no_EG	j	ENST00000236671	6.83877	1.60866	14.2197	0.000162657	0.0102506	-
MSTRG.34395.9	NA	6	145625322	145735216	-	not_in_ref	not_in_ref	not_in_ref	not_in_ref	not_in_ref	no_EG	j	ENST00000461700	8.56782	1.301	14.2085	0.000163627	0.0102931	-
ENST00000611366	ENSG00000100918	14	24172025	24180254	+	REC8-002	protein_coding	ENSG00000100918	REC8	protein_coding	9985	E	ENST00000611366	11.5698	0.728751	14.1887	0.000165358	0.0103818	-
ENST00000361923	ENSG00000049246	1	7784703	7845177	+	PER3-002	protein_coding	ENSG00000049246	PER3	protein_coding	8863	E	ENST00000361923	-12.0893	1.9146	14.1843	0.000165745	0.0103818	-
MSTRG.25900.20	NA	22	35299929	35347981	+	not_in_ref	not_in_ref	not_in_ref	not_in_ref	not_in_ref	no_EG	j	ENST00000404284	6.64311	1.21679	14.1794	0.000166184	0.0103818	-
MSTRG.34438.3	NA	6	149505275	149542272	-	not_in_ref	not_in_ref	not_in_ref	not_in_ref	not_in_ref	no_EG	j	ENST00000253329	-4.11077	2.67149	14.1788	0.000166234	0.0103818	-
ENST00000451209	ENSG00000233971	2	71984182	71984434	-	RPS20P10-001	processed_pseudogene	ENSG00000233971	RPS20P10	processed_pseudogene	NA	E	ENST00000451209	-4.49071	0.777911	14.1508	0.000168724	0.0105184	-
ENST00000394709	ENSG00000126803	14	64535905	64546173	+	HSPA2-001	protein_coding	ENSG00000126803	HSPA2	protein_coding	3306	E	ENST00000394709	8.31435	-2.63665	14.1172	0.000171766	0.0106889	-
ENST00000318003	ENSG00000132024	19	13906201	13930879	+	CC2D1A-001	protein_coding	ENSG00000132024	CC2D1A	protein_coding	54862	E	ENST00000318003	7.88172	1.614	14.1045	0.000172926	0.0107418	-
ENST00000356721	ENSG00000196470	16	48360531	48365901	-	SIAH1-001	protein_coding	ENSG00000196470	SIAH1	protein_coding	6477	E	ENST00000356721	8.17135	2.22253	14.048	0.000178203	0.0110499	-
MSTRG.924.3	NA	1	37958063	37989995	-	not_in_ref	not_in_ref	not_in_ref	not_in_ref	not_in_ref	no_EG	j	ENST00000373019	8.9226	1.73927	14.0438	0.000178603	0.0110549	-
MSTRG.25212.5	NA	21	33589461	33641196	-	not_in_ref	not_in_ref	not_in_ref	not_in_ref	not_in_ref	no_EG	j	ENST00000361534	9.38637	2.54575	14.0248	0.000180419	0.0111475	-
ENST00000542140	ENSG00000076053	11	114400666	114408909	+	RBM7-004	nonsense_mediated_decay	ENSG00000076053	RBM7	protein_coding	10179	E	ENST00000542140	6.5475	2.73561	14.0062	0.000182204	0.0112378	-
ENST00000533706	ENSG00000110274	11	117363955	117413266	+	CEP164-008	processed_transcript	ENSG00000110274	CEP164	protein_coding	22897	E	ENST00000533706	6.26992	0.404424	13.9446	0.000188274	0.0115915	-
ENST00000367309	ENSG00000174307	1	201465958	201469237	-	PHLDA3-002	protein_coding	ENSG00000174307	PHLDA3	protein_coding	NA	E	ENST00000367309	6.1191	3.10002	13.9167	0.000191093	0.0117443	-
ENST00000547190	ENSG00000167588	12	50104008	50108108	+	GPD1-007	processed_transcript	ENSG00000167588	GPD1	protein_coding	2819	E	ENST00000547190	8.89083	2.93118	13.8918	0.000193638	0.0118796	-
ENST00000395592	ENSG00000166482	17	19383442	19387190	-	MFAP4-002	protein_coding	ENSG00000166482	MFAP4	protein_coding	4239	E	ENST00000395592	6.06267	0.351899	13.8845	0.000194392	0.0119049	-
ENST00000553325	ENSG00000126214	14	103675552	103686200	+	KLC1-030	protein_coding	ENSG00000126214	KLC1	protein_coding	3831	noCuffcomp	noCuffcomp	7.91293	-0.163346	13.8128	0.000201952	0.0123461	-
MSTRG.15996.5	NA	17	7226137	7230779	-	not_in_ref	not_in_ref	not_in_ref	not_in_ref	not_in_ref	no_EG	j	ENST00000005340	2.21276	0.807639	13.8071	0.000202567	0.0123619	-
MSTRG.8398.1	NA	12	21764951	21775506	-	not_in_ref	not_in_ref	not_in_ref	not_in_ref	not_in_ref	no_EG	j	ENST00000240662	7.43759	2.47741	13.7958	0.000203791	0.0123954	-
MSTRG.1155.4	NA	1	46557410	46585560	-	not_in_ref	not_in_ref	not_in_ref	not_in_ref	not_in_ref	no_EG	j	ENST00000371946	8.2985	2.00178	13.7929	0.000204102	0.0123954	-
ENST00000547997	ENSG00000028203	12	95217761	95301172	+	VEZT-002	nonsense_mediated_decay	ENSG00000028203	VEZT	protein_coding	55591	E	ENST00000547997	5.73029	3.01749	13.7922	0.000204186	0.0123954	-
ENST00000551676	ENSG00000186298	12	110721770	110742839	-	PPP1CC-009	protein_coding	ENSG00000186298	PPP1CC	protein_coding	5501	E	ENST00000551676	7.7117	-0.554612	13.7762	0.000205927	0.0124662	-
MSTRG.31811.10	NA	5	132483086	132490754	-	not_in_ref	not_in_ref	not_in_ref	not_in_ref	not_in_ref	no_EG	j	ENST00000245414	6.45103	2.52087	13.7749	0.000206072	0.0124662	-
MSTRG.19307.1	NA	19	11199226	11262401	-	not_in_ref	not_in_ref	not_in_ref	not_in_ref	not_in_ref	no_EG	j	ENST00000294618	3.34861	1.24687	13.7442	0.00020947	0.0126498	-
ENST00000444874	ENSG00000272752	7	100336243	100367663	+	STAG3L5P-PVRIG2P-PILRB-002	processed_transcript	ENSG00000272752	STAG3L5P-PVRIG2P-PILRB	protein_coding	NA	E	ENST00000444874	8.20041	0.715895	13.7212	0.000212047	0.0127832	-
MSTRG.23518.18	NA	2	208334372	208358746	+	not_in_ref	not_in_ref	not_in_ref	not_in_ref	not_in_ref	no_EG	j	ENST00000264380	-5.23654	3.4254	13.7013	0.000214304	0.0128969	-
ENST00000349048	ENSG00000141959	21	44300051	44327376	+	PFKL-001	protein_coding	ENSG00000141959	PFKL	protein_coding	5211	E	ENST00000349048	8.51296	3.61316	13.6911	0.000215475	0.0129449	-
MSTRG.35997.4	NA	7	100867387	100873452	+	not_in_ref	not_in_ref	not_in_ref	not_in_ref	not_in_ref	no_EG	j	ENST00000200457	8.3254	1.312	13.683	0.000216406	0.0129595	-
MSTRG.35971.4	NA	7	100325608	100332566	-	not_in_ref	not_in_ref	not_in_ref	not_in_ref	not_in_ref	no_EG	j	ENST00000431037	-0.574358	0.344346	13.6825	0.000216465	0.0129595	-
ENST00000442551	ENSG00000101182	20	62136735	62139905	-	PSMA7-006	protein_coding	ENSG00000101182	PSMA7	protein_coding	5688	E	ENST00000442551	4.46225	4.14322	13.6788	0.000216885	0.0129623	-
MSTRG.33760.12	NA	6	75084353	75105873	-	not_in_ref	not_in_ref	not_in_ref	not_in_ref	not_in_ref	no_EG	j	ENST00000615798	8.70634	4.08379	13.6701	0.000217901	0.0130002	-
ENST00000320736	ENSG00000176945	3	195720995	195733504	+	MUC20-201	protein_coding	ENSG00000176945	MUC20	protein_coding	200958	E	ENST00000320736	7.70203	-1.32655	13.6669	0.000218267	0.0130002	-
MSTRG.22040.19	NA	2	85355086	85391752	+	not_in_ref	not_in_ref	not_in_ref	not_in_ref	not_in_ref	no_EG	j	ENST00000409344	-8.67005	-0.220076	13.64	0.000221423	0.0131656	-
MSTRG.21979.6	NA	2	74529775	74531912	+	not_in_ref	not_in_ref	not_in_ref	not_in_ref	not_in_ref	no_EG	j	ENST00000467961	-8.2155	1.22413	13.5963	0.000226632	0.0134522	-
ENST00000514985	ENSG00000250722	5	42799880	42812079	-	SEPP1-001	protein_coding	ENSG00000250722	SEPP1	protein_coding	6414	E	ENST00000514985	7.89745	2.68827	13.5899	0.000227411	0.0134534	-
MSTRG.31886.9	NA	5	135334435	135399204	-	not_in_ref	not_in_ref	not_in_ref	not_in_ref	not_in_ref	no_EG	j	ENST00000511689	11.2016	1.97949	13.5897	0.000227427	0.0134534	-
MSTRG.34703.4	NA	6	169215792	169223440	-	not_in_ref	not_in_ref	not_in_ref	not_in_ref	not_in_ref	no_EG	j	ENST00000366787	8.43284	1.24677	13.5849	0.000228017	0.013465	-
MSTRG.37831.19	NA	8	90001517	90044985	+	not_in_ref	not_in_ref	not_in_ref	not_in_ref	not_in_ref	no_EG	j	ENST00000522161	-5.78773	0.287709	13.5788	0.000228752	0.013465	-
ENST00000434407	ENSG00000204642	6	29723464	29726526	+	HLA-F-002	protein_coding	ENSG00000204642	HLA-F	protein_coding	3134	E	ENST00000434407	6.30309	1.99834	13.577	0.000228974	0.013465	-
ENST00000610563	ENSG00000188811	13	39038391	39050103	+	NHLRC3-201	protein_coding	ENSG00000188811	NHLRC3	protein_coding	387921	noCuffcomp	noCuffcomp	7.83717	3.89237	13.5745	0.00022928	0.013465	-
ENST00000434316	ENSG00000150403	13	113490995	113550195	+	TMCO3-007	protein_coding	ENSG00000150403	TMCO3	protein_coding	55002	E	ENST00000434316	12.3957	2.74127	13.5722	0.000229562	0.013465	-
MSTRG.22040.17	NA	2	85355071	85391737	+	not_in_ref	not_in_ref	not_in_ref	not_in_ref	not_in_ref	no_EG	j	ENST00000409344	7.2903	2.9601	13.5479	0.000232553	0.0136175	-
MSTRG.38406.9	NA	8	144291758	144314712	+	not_in_ref	not_in_ref	not_in_ref	not_in_ref	not_in_ref	no_EG	j	ENST00000528838	8.21497	3.34751	13.5402	0.000233512	0.0136407	-
ENST00000427528	ENSG00000184319	22	50798655	50799123	+	RPL23AP82-001	transcribed_unprocessed_pseudogene	ENSG00000184319	RPL23AP82	transcribed_unprocessed_pseudogene	NA	noCuffcomp	noCuffcomp	-8.65078	0.0995603	13.5384	0.000233736	0.0136407	-
MSTRG.3911.4	NA	1	241593602	241628494	-	not_in_ref	not_in_ref	not_in_ref	not_in_ref	not_in_ref	no_EG	j	ENST00000478849	10.1951	0.559984	13.5344	0.000234235	0.0136469	-
ENST00000380605	ENSG00000088882	20	2794069	2800637	-	CPXM1-001	protein_coding	ENSG00000088882	CPXM1	protein_coding	56265	E	ENST00000380605	9.5032	2.43092	13.5086	0.000237467	0.013812	-
MSTRG.17614.7	NA	17	63702842	63707404	-	not_in_ref	not_in_ref	not_in_ref	not_in_ref	not_in_ref	no_EG	j	ENST00000336174	8.1736	1.54234	13.5014	0.000238392	0.0138427	-
MSTRG.37126.30	NA	8	23429072	23447787	-	not_in_ref	not_in_ref	not_in_ref	not_in_ref	not_in_ref	no_EG	j	ENST00000358689	9.76914	0.872666	13.4702	0.000242382	0.0140509	-
MSTRG.22292.7	NA	2	99400540	99489859	-	not_in_ref	not_in_ref	not_in_ref	not_in_ref	not_in_ref	no_EG	j	ENST00000258428	2.89958	-0.225089	13.4316	0.000247422	0.0143191	-
ENST00000367248	ENSG00000131018	6	152433525	152636883	-	SYNE1-009	protein_coding	ENSG00000131018	SYNE1	protein_coding	23345	E	ENST00000367248	7.40796	-1.7163	13.4258	0.000248191	0.0143397	-
ENST00000569031	ENSG00000234465	19	43580638	43582098	+	PINLYP-004	protein_coding	ENSG00000234465	PINLYP	protein_coding	390940	E	ENST00000569031	7.24363	0.369576	13.4079	0.000250567	0.014436	-
MSTRG.18155.3	NA	18	670381	712611	-	not_in_ref	not_in_ref	not_in_ref	not_in_ref	not_in_ref	no_EG	j	ENST00000383578	6.63678	0.146935	13.407	0.000250689	0.014436	-
MSTRG.8406.3	NA	12	21797428	21864466	-	not_in_ref	not_in_ref	not_in_ref	not_in_ref	not_in_ref	no_EG	j	ENST00000261200	6.75375	4.08293	13.3839	0.000253798	0.0145909	-
MSTRG.19389.11	NA	19	12891180	12900817	+	not_in_ref	not_in_ref	not_in_ref	not_in_ref	not_in_ref	no_EG	j	ENST00000222214	7.84995	-0.39046	13.3725	0.000255343	0.0146313	-
MSTRG.22967.6	NA	2	165863027	165953843	-	not_in_ref	not_in_ref	not_in_ref	not_in_ref	not_in_ref	no_EG	j	ENST00000243344	2.24089	1.65271	13.3725	0.000255345	0.0146313	-
MSTRG.1678.22	NA	1	89006729	89022738	-	not_in_ref	not_in_ref	not_in_ref	not_in_ref	not_in_ref	no_EG	j	ENST00000493594	6.7967	2.32766	13.3554	0.000257673	0.0147404	-
MSTRG.33277.18	NA	6	32948618	32953022	-	not_in_ref	not_in_ref	not_in_ref	not_in_ref	not_in_ref	no_EG	j	ENST00000374843	8.12585	-0.603442	13.3491	0.000258549	0.0147662	-
ENST00000443998	ENSG00000230202	6	117998975	117999448	+	RP11-632C17__A.1-001	processed_pseudogene	ENSG00000230202	RP11-632C17__A.1	processed_pseudogene	NA	E	ENST00000443998	7.93274	1.12111	13.335	0.000260491	0.0148527	-
ENST00000376817	ENSG00000204628	5	181236937	181243903	-	GNB2L1-035	protein_coding	ENSG00000204628	GNB2L1	protein_coding	10399	E	ENST00000376817	8.51895	4.50126	13.3202	0.000262555	0.0149459	-
ENST00000489485	ENSG00000013297	3	170421218	170434092	+	CLDN11-004	processed_transcript	ENSG00000013297	CLDN11	protein_coding	NA	E	ENST00000489485	-4.83469	0.111336	13.313	0.000263578	0.0149795	-
MSTRG.28882.21	NA	4	1912104	1978902	+	not_in_ref	not_in_ref	not_in_ref	not_in_ref	not_in_ref	no_EG	j	ENST00000312087	2.62933	0.558956	13.3098	0.000264016	0.0149799	-
MSTRG.11737.3	NA	14	68874323	68979031	-	not_in_ref	not_in_ref	not_in_ref	not_in_ref	not_in_ref	no_EG	j	ENST00000394419	9.01396	3.61269	13.2872	0.000267223	0.0151371	-
MSTRG.229.16	NA	1	7787200	7835899	+	not_in_ref	not_in_ref	not_in_ref	not_in_ref	not_in_ref	no_EG	j	ENST00000614998	5.45372	0.27047	13.2816	0.000268029	0.015158	-
MSTRG.27710.9	NA	3	121663228	121729950	-	not_in_ref	not_in_ref	not_in_ref	not_in_ref	not_in_ref	no_EG	j	ENST00000393667	-7.28403	5.21074	13.2408	0.000273916	0.0154658	-
MSTRG.31205.32	NA	5	72893676	72909408	+	not_in_ref	not_in_ref	not_in_ref	not_in_ref	not_in_ref	no_EG	j	ENST00000337273	8.21057	0.516528	13.2328	0.000275095	0.0155072	-
ENST00000369669	ENSG00000007341	1	112525883	112618928	-	ST7L-011	protein_coding	ENSG00000007341	ST7L	protein_coding	54879	E	ENST00000369669	2.52178	-0.427953	13.2201	0.000276964	0.0155872	-
ENST00000520148	ENSG00000104325	8	90042733	90052092	+	DECR1-019	nonsense_mediated_decay	ENSG00000104325	DECR1	protein_coding	1666	E	ENST00000520148	8.46378	-1.14405	13.2126	0.00027807	0.0156241	-
ENST00000616966	ENSG00000171135	3	9890587	9893377	+	JAGN1-201	protein_coding	ENSG00000171135	JAGN1	protein_coding	84522	noCuffcomp	noCuffcomp	7.51268	1.67545	13.1953	0.000280646	0.0157434	-
ENST00000373779	ENSG00000060656	1	29236516	29326800	+	PTPRU-001	protein_coding	ENSG00000060656	PTPRU	protein_coding	10076	E	ENST00000373779	7.36022	0.760753	13.1723	0.000284124	0.015901	-
ENST00000511118	ENSG00000174695	5	83056535	83061975	-	TMEM167A-007	retained_intron	ENSG00000174695	TMEM167A	protein_coding	153339	E	ENST00000511118	8.85671	2.2527	13.1706	0.000284371	0.015901	-
MSTRG.38306.9	NA	8	142270528	142402888	-	not_in_ref	not_in_ref	not_in_ref	not_in_ref	not_in_ref	no_EG	j	ENST00000524325	6.84894	0.197707	13.1544	0.00028685	0.0160138	-
MSTRG.32278.14	NA	5	157790607	157806012	-	not_in_ref	not_in_ref	not_in_ref	not_in_ref	not_in_ref	no_EG	j	ENST00000523094	7.27944	0.873245	13.1492	0.000287649	0.0160326	-
MSTRG.7180.11	NA	11	77821215	77872352	+	not_in_ref	not_in_ref	not_in_ref	not_in_ref	not_in_ref	no_EG	j	ENST00000527134	5.46409	1.94817	13.125	0.000291375	0.0162143	-
ENST00000378602	ENSG00000178821	1	1917590	1918797	-	TMEM52-004	protein_coding	ENSG00000178821	TMEM52	protein_coding	339456	noCuffcomp	noCuffcomp	8.28232	-0.656724	13.122	0.000291842	0.0162143	-
MSTRG.31962.10	NA	5	139562611	139623444	+	not_in_ref	not_in_ref	not_in_ref	not_in_ref	not_in_ref	no_EG	j	ENST00000398734	7.09133	-0.459599	13.1178	0.0002925	0.0162206	-
ENST00000506793	ENSG00000151806	4	44678427	44700759	+	GUF1-002	processed_transcript	ENSG00000151806	GUF1	protein_coding	60558	E	ENST00000506793	1.76722	1.76525	13.1153	0.00029289	0.0162206	-
ENST00000435683	ENSG00000064687	19	1042625	1065572	+	ABCA7-002	protein_coding	ENSG00000064687	ABCA7	protein_coding	10347	noCuffcomp	noCuffcomp	-5.08835	2.23593	13.1015	0.000295065	0.0163103	-
MSTRG.341.4	NA	1	11806232	11843130	+	not_in_ref	not_in_ref	not_in_ref	not_in_ref	not_in_ref	no_EG	j	ENST00000346436	8.94498	1.50571	13.097	0.000295769	0.0163103	-
MSTRG.30819.14	NA	5	36178791	36184014	+	not_in_ref	not_in_ref	not_in_ref	not_in_ref	not_in_ref	no_EG	j	ENST00000274255	8.02041	0.566352	13.094	0.000296239	0.0163103	-
MSTRG.17961.18	NA	17	80209291	80220333	-	not_in_ref	not_in_ref	not_in_ref	not_in_ref	not_in_ref	no_EG	j	ENST00000326317	3.04605	1.04562	13.0931	0.000296388	0.0163103	-
ENST00000438182	ENSG00000198342	19	12349583	12365641	-	ZNF442-002	protein_coding	ENSG00000198342	ZNF442	protein_coding	79973	E	ENST00000438182	8.10781	-0.498472	13.0859	0.000297524	0.0163469	-
MSTRG.3557.7	NA	1	212608838	212620775	+	not_in_ref	not_in_ref	not_in_ref	not_in_ref	not_in_ref	no_EG	j	ENST00000613954	7.80028	1.74603	13.0494	0.000303376	0.0166421	-
MSTRG.23438.31	NA	2	203407982	203427411	+	not_in_ref	not_in_ref	not_in_ref	not_in_ref	not_in_ref	no_EG	j	ENST00000295851	7.63021	-1.59892	13.0447	0.000304142	0.0166578	-
ENST00000586237	ENSG00000123143	19	14463875	14471859	+	PKN1-010	protein_coding	ENSG00000123143	PKN1	protein_coding	5585	noCuffcomp	noCuffcomp	7.4155	1.29522	13.0119	0.000309518	0.0169139	-
MSTRG.28084.5	NA	3	142306620	142370588	-	not_in_ref	not_in_ref	not_in_ref	not_in_ref	not_in_ref	no_EG	j	ENST00000264951	9.23209	2.11322	13.0093	0.000309945	0.0169139	-
MSTRG.38951.23	NA	9	37780607	37903650	-	not_in_ref	not_in_ref	not_in_ref	not_in_ref	not_in_ref	no_EG	j	ENST00000540557	-7.9257	-1.38815	13.0073	0.00031028	0.0169139	-
ENST00000321955	ENSG00000077616	11	90134712	90192611	+	NAALAD2-002	protein_coding	ENSG00000077616	NAALAD2	protein_coding	10003	E	ENST00000321955	6.24235	1.00595	12.9837	0.000314214	0.0171015	-
MSTRG.15975.6	NA	17	6641034	6643114	+	not_in_ref	not_in_ref	not_in_ref	not_in_ref	not_in_ref	no_EG	j	ENST00000250101	7.07619	0.88982	12.9726	0.000316078	0.0171732	-
ENST00000377384	ENSG00000147996	9	65675875	65682577	+	CBWD5-012	protein_coding	ENSG00000147996	CBWD5	protein_coding	220869	E	ENST00000377384	-7.14015	0.953443	12.9688	0.000316731	0.0171732	-
MSTRG.5556.8	NA	10	119104104	119137964	+	not_in_ref	not_in_ref	not_in_ref	not_in_ref	not_in_ref	no_EG	j	ENST00000535029	4.2002	1.32638	12.9671	0.000317015	0.0171732	-
ENST00000602496	ENSG00000141098	16	67680749	67719324	-	GFOD2-004	nonsense_mediated_decay	ENSG00000141098	GFOD2	protein_coding	81577	E	ENST00000602496	7.36961	-0.935639	12.955	0.000319076	0.0172384	-
ENST00000578638	ENSG00000073350	17	75563774	75575194	+	LLGL2-009	nonsense_mediated_decay	ENSG00000073350	LLGL2	protein_coding	3993	E	ENST00000578638	-1.53885	-1.23727	12.9542	0.000319212	0.0172384	-
MSTRG.26951.8	NA	3	47850696	47928302	-	not_in_ref	not_in_ref	not_in_ref	not_in_ref	not_in_ref	no_EG	j	ENST00000426837	-7.57048	3.63496	12.9273	0.000323816	0.0174363	-
MSTRG.15847.7	NA	17	2975754	3037740	+	not_in_ref	not_in_ref	not_in_ref	not_in_ref	not_in_ref	no_EG	j	ENST00000542807	8.19889	1.27302	12.927	0.000323879	0.0174363	-
MSTRG.22669.4	NA	2	131047876	131091956	-	not_in_ref	not_in_ref	not_in_ref	not_in_ref	not_in_ref	no_EG	j	ENST00000409185	12.0412	1.87724	12.879	0.000332284	0.017861	-
ENST00000567836	ENSG00000103249	16	1446643	1448608	-	CLCN7-015	retained_intron	ENSG00000103249	CLCN7	protein_coding	1186	E	ENST00000567836	7.36897	0.707705	12.8318	0.000340775	0.0182791	-
ENST00000254963	ENSG00000132622	20	3732667	3753111	+	HSPA12B-001	protein_coding	ENSG00000132622	HSPA12B	protein_coding	116835	E	ENST00000254963	7.14062	1.31994	12.83	0.000341114	0.0182791	-
ENST00000551150	ENSG00000089157	12	120196699	120201099	-	RPLP0-002	protein_coding	ENSG00000089157	RPLP0	protein_coding	6175	E	ENST00000551150	6.55389	1.79898	12.8226	0.000342456	0.0183227	-
ENST00000507634	ENSG00000163138	4	20700472	20752861	+	PACRGL-016	protein_coding	ENSG00000163138	PACRGL	protein_coding	133015	E	ENST00000507634	-3.98979	-0.731547	12.7757	0.000351158	0.0187594	-
MSTRG.35495.12	NA	7	65960704	65982096	-	not_in_ref	not_in_ref	not_in_ref	not_in_ref	not_in_ref	no_EG	j	ENST00000304895	8.13301	1.80916	12.7708	0.000352066	0.018779	-
MSTRG.14273.9	NA	16	3658038	3710428	-	not_in_ref	not_in_ref	not_in_ref	not_in_ref	not_in_ref	no_EG	j	ENST00000246957	13.4096	2.28913	12.7483	0.000356333	0.0189775	-
ENST00000304987	ENSG00000170145	11	111602391	111730853	+	SIK2-001	protein_coding	ENSG00000170145	SIK2	protein_coding	NA	E	ENST00000304987	7.60944	6.49721	12.7386	0.000358194	0.0190474	-
MSTRG.20535.8	NA	19	50205528	50310542	+	not_in_ref	not_in_ref	not_in_ref	not_in_ref	not_in_ref	no_EG	j	ENST00000601313	8.21684	4.10289	12.7298	0.000359873	0.0191074	-
MSTRG.34993.2	NA	7	23105758	23175375	+	not_in_ref	not_in_ref	not_in_ref	not_in_ref	not_in_ref	no_EG	j	ENST00000521082	8.05347	2.54195	12.7233	0.000361134	0.019145	-
ENST00000351325	ENSG00000266964	19	35138808	35143109	+	FXYD1-001	protein_coding	ENSG00000266964	FXYD1	protein_coding	5348	E	ENST00000351325	7.96586	0.216726	12.7171	0.000362318	0.0191786	-
ENST00000546433	ENSG00000084112	12	108784797	108807690	-	SSH1-004	nonsense_mediated_decay	ENSG00000084112	SSH1	protein_coding	54434	noCuffcomp	noCuffcomp	-4.66585	1.59449	12.7141	0.000362915	0.0191809	-
ENST00000412309	ENSG00000110077	11	60172497	60183223	-	MS4A6A-006	protein_coding	ENSG00000110077	MS4A6A	protein_coding	64231	noCuffcomp	noCuffcomp	7.2668	0.392553	12.7071	0.000364261	0.0192228	-
MSTRG.36192.5	NA	7	112435599	112476192	+	not_in_ref	not_in_ref	not_in_ref	not_in_ref	not_in_ref	no_EG	j	ENST00000005558	2.32403	4.28538	12.7023	0.00036521	0.0192436	-
MSTRG.4576.2	NA	10	47207377	47228868	+	not_in_ref	not_in_ref	not_in_ref	not_in_ref	not_in_ref	no_EG	u	NA	7.80907	1.34194	12.6854	0.000368517	0.0193583	-
ENST00000246194	ENSG00000125970	20	33993722	34080271	+	RALY-002	protein_coding	ENSG00000125970	RALY	protein_coding	NA	E	ENST00000246194	7.89771	1.58597	12.684	0.000368801	0.0193583	-
ENST00000477040	ENSG00000116898	1	36455773	36456566	-	MRPS15-004	processed_transcript	ENSG00000116898	MRPS15	protein_coding	64960	E	ENST00000477040	4.91127	1.70446	12.6813	0.000369326	0.0193583	-
MSTRG.27948.21	NA	3	132680740	132722311	-	not_in_ref	not_in_ref	not_in_ref	not_in_ref	not_in_ref	no_EG	j	ENST00000471702	5.78702	1.47143	12.6799	0.000369616	0.0193583	-
ENST00000602153	ENSG00000105193	19	39433223	39433761	-	RPS16-009	protein_coding	ENSG00000105193	RPS16	protein_coding	6217	E	ENST00000602153	6.08577	0.238849	12.6116	0.000383356	0.0200477	-
ENST00000506300	ENSG00000164035	4	100397794	100475077	-	EMCN-007	protein_coding	ENSG00000164035	EMCN	protein_coding	51705	E	ENST00000506300	7.95998	-0.0156326	12.5641	0.000393229	0.020533	-
ENST00000012134	ENSG00000010818	6	142751469	142837047	-	HIVEP2-002	protein_coding	ENSG00000010818	HIVEP2	protein_coding	3097	E	ENST00000012134	8.80493	4.17941	12.5339	0.000399632	0.0208269	-
ENST00000281182	ENSG00000151498	11	134253495	134265855	+	ACAD8-001	protein_coding	ENSG00000151498	ACAD8	protein_coding	27034	E	ENST00000281182	5.82864	2.78034	12.5317	0.000400098	0.0208269	-
ENST00000357328	ENSG00000198105	10	37828765	37858084	-	ZNF248-201	protein_coding	ENSG00000198105	ZNF248	protein_coding	57209	E	ENST00000357328	5.97262	1.0921	12.5291	0.000400655	0.0208269	-
MSTRG.30893.1	NA	5	41142108	41186333	-	not_in_ref	not_in_ref	not_in_ref	not_in_ref	not_in_ref	no_EG	j	ENST00000263413	8.70088	3.3838	12.5262	0.000401287	0.0208285	-
ENST00000309451	ENSG00000173272	2	131483960	131492422	-	MZT2A-001	protein_coding	ENSG00000173272	MZT2A	protein_coding	653784	E	ENST00000309451	7.4118	3.19001	12.4883	0.000409499	0.021223	-
MSTRG.39883.4	NA	9	128729786	128755655	-	not_in_ref	not_in_ref	not_in_ref	not_in_ref	not_in_ref	no_EG	j	ENST00000291900	8.48969	3.34605	12.4808	0.000411166	0.0212444	-
MSTRG.5139.4	NA	10	89392672	89403988	+	not_in_ref	not_in_ref	not_in_ref	not_in_ref	not_in_ref	no_EG	j	ENST00000546318	6.95387	1.11608	12.4795	0.00041145	0.0212444	-
ENST00000450093	ENSG00000235453	9	32551773	32552998	+	TOPORS-AS1-002	antisense	ENSG00000235453	TOPORS-AS1	antisense	100129250	E	ENST00000450093	-5.34721	0.166716	12.4781	0.000411747	0.0212444	-
MSTRG.35058.6	NA	7	27107052	27152450	-	not_in_ref	not_in_ref	not_in_ref	not_in_ref	not_in_ref	no_EG	j	ENST00000317201	8.14258	0.966878	12.4433	0.000419503	0.0216125	-
MSTRG.25637.30	NA	22	23313077	23314695	+	not_in_ref	not_in_ref	not_in_ref	not_in_ref	not_in_ref	no_EG	j	ENST00000305877	-5.6958	-0.20006	12.4005	0.000429225	0.0219864	-
MSTRG.35548.3	NA	7	72574562	72815431	-	not_in_ref	not_in_ref	not_in_ref	not_in_ref	not_in_ref	no_EG	j	ENST00000620995	6.94563	-0.191989	12.4004	0.000429231	0.0219864	-
ENST00000383820	ENSG00000156990	3	9837849	9844016	-	RPUSD3-001	protein_coding	ENSG00000156990	RPUSD3	protein_coding	285367	E	ENST00000383820	7.02528	0.649206	12.3998	0.000429384	0.0219864	-
ENST00000382329	ENSG00000107099	9	366251	465255	+	DOCK8-005	protein_coding	ENSG00000107099	DOCK8	protein_coding	81704	E	ENST00000382329	7.07649	2.19926	12.3984	0.000429705	0.0219864	-
MSTRG.35931.4	NA	7	99923274	99976042	-	not_in_ref	not_in_ref	not_in_ref	not_in_ref	not_in_ref	no_EG	j	ENST00000292401	7.03642	0.99218	12.3974	0.000429927	0.0219864	-
MSTRG.12952.2	NA	15	42738778	42878657	-	not_in_ref	not_in_ref	not_in_ref	not_in_ref	not_in_ref	no_EG	j	ENST00000622375	3.66097	2.40952	12.3825	0.000433379	0.0221304	-
MSTRG.29759.4	NA	4	99948120	99950254	-	not_in_ref	not_in_ref	not_in_ref	not_in_ref	not_in_ref	no_EG	j	ENST00000296417	13.5259	1.40394	12.3371	0.000444054	0.0226422	-
ENST00000508798	ENSG00000168785	4	98470367	98658570	-	TSPAN5-002	nonsense_mediated_decay	ENSG00000168785	TSPAN5	protein_coding	10098	E	ENST00000508798	7.59224	-0.286047	12.3257	0.000446771	0.0227473	-
ENST00000564304	ENSG00000168488	16	28823095	28836919	+	ATXN2L-008	protein_coding	ENSG00000168488	ATXN2L	protein_coding	11273	E	ENST00000564304	-3.65444	2.04441	12.3027	0.000452307	0.0229955	-
ENST00000620510	ENSG00000106261	7	100023408	100041688	+	ZKSCAN1-202	protein_coding	ENSG00000106261	ZKSCAN1	protein_coding	7586	E	ENST00000620510	8.95344	2.77632	12.2683	0.000460728	0.0233894	-
ENST00000389022	ENSG00000205309	17	17303335	17347661	+	NT5M-007	protein_coding	ENSG00000205309	NT5M	protein_coding	56953	E	ENST00000389022	7.27155	-0.631098	12.2599	0.000462806	0.0234606	-
MSTRG.40661.7	NA	X	48476206	48486311	+	not_in_ref	not_in_ref	not_in_ref	not_in_ref	not_in_ref	no_EG	j	ENST00000019019	5.51579	2.16057	12.2511	0.000464987	0.0235368	-
MSTRG.17368.4	NA	17	51275868	51297878	+	not_in_ref	not_in_ref	not_in_ref	not_in_ref	not_in_ref	no_EG	j	ENST00000225298	5.01434	0.352527	12.201	0.000477649	0.0241425	-
MSTRG.21086.35	NA	2	9406814	9423430	-	not_in_ref	not_in_ref	not_in_ref	not_in_ref	not_in_ref	no_EG	j	ENST00000360635	5.0983	4.60301	12.1698	0.000485706	0.0244972	-
ENST00000378239	ENSG00000068912	2	53787080	53818819	+	ERLEC1-002	protein_coding	ENSG00000068912	ERLEC1	protein_coding	27248	E	ENST00000378239	5.30021	2.93105	12.1683	0.000486077	0.0244972	-
MSTRG.2614.8	NA	1	155002880	155015309	+	not_in_ref	not_in_ref	not_in_ref	not_in_ref	not_in_ref	no_EG	j	ENST00000417934	6.75944	-0.102938	12.1605	0.00048811	0.024564	-
ENST00000230321	ENSG00000112559	6	41638447	41654246	+	MDFI-001	protein_coding	ENSG00000112559	MDFI	protein_coding	4188	E	ENST00000230321	5.92625	4.25644	12.1539	0.000489858	0.0246118	-
ENST00000452361	ENSG00000274049	2	74455088	74460884	+	INO80B-WBP1-001	nonsense_mediated_decay	ENSG00000274049	INO80B-WBP1	protein_coding	NA	E	ENST00000452361	8.38965	1.65255	12.1515	0.000490478	0.0246118	-
MSTRG.38008.42	NA	8	102255373	102347000	-	not_in_ref	not_in_ref	not_in_ref	not_in_ref	not_in_ref	no_EG	j	ENST00000520539	4.85392	4.33473	12.1182	0.000499327	0.0250197	-
ENST00000281031	ENSG00000151366	11	78068304	78080219	-	NDUFC2-001	protein_coding	ENSG00000151366	NDUFC2	protein_coding	4718	E	ENST00000281031	-7.67878	0.102895	12.1079	0.000502087	0.0251217	-
ENST00000448232	ENSG00000151718	4	183099492	183318434	+	WWC2-006	protein_coding	ENSG00000151718	WWC2	protein_coding	80014	E	ENST00000448232	8.16909	2.01098	12.102	0.000503676	0.025163	-
ENST00000397881	ENSG00000130813	19	10086852	10093242	+	C19orf66-004	protein_coding	ENSG00000130813	C19orf66	protein_coding	55337	E	ENST00000397881	3.81878	0.719956	12.0971	0.000505009	0.025163	-
MSTRG.37213.8	NA	8	30063130	30082948	-	not_in_ref	not_in_ref	not_in_ref	not_in_ref	not_in_ref	no_EG	j	ENST00000256255	8.26892	5.17565	12.0968	0.000505086	0.025163	-
ENST00000294973	ENSG00000162882	2	42767089	42792592	-	HAAO-001	protein_coding	ENSG00000162882	HAAO	protein_coding	23498	E	ENST00000294973	7.48947	-0.277263	12.0815	0.000509245	0.0253339	-
MSTRG.2676.3	NA	1	156249224	156281816	-	not_in_ref	not_in_ref	not_in_ref	not_in_ref	not_in_ref	no_EG	j	ENST00000361813	-3.84458	1.21157	12.0747	0.000511095	0.0253895	-
MSTRG.20491.10	NA	19	49453391	49470585	+	not_in_ref	not_in_ref	not_in_ref	not_in_ref	not_in_ref	no_EG	j	ENST00000293350	8.39471	1.45302	12.0426	0.000519972	0.0257936	-
MSTRG.24450.9	NA	20	35542116	35557633	+	not_in_ref	not_in_ref	not_in_ref	not_in_ref	not_in_ref	no_EG	j	ENST00000357394	4.97259	3.41704	12.034	0.00052239	0.0258483	-
ENST00000589683	ENSG00000131477	17	42760775	42763041	+	RAMP2-004	protein_coding	ENSG00000131477	RAMP2	protein_coding	10266	E	ENST00000589683	7.56475	1.9225	12.0334	0.000522563	0.0258483	-
ENST00000396231	ENSG00000186976	22	43528744	43812190	-	EFCAB6-001	protein_coding	ENSG00000186976	EFCAB6	protein_coding	64800	E	ENST00000396231	6.94471	-0.450419	12.0137	0.000528113	0.0260856	-
ENST00000431419	ENSG00000106245	7	99415136	99419577	+	BUD31-005	protein_coding	ENSG00000106245	BUD31	protein_coding	8896	E	ENST00000431419	4.60077	0.924517	12.0078	0.000529796	0.0261316	-
MSTRG.25157.18	NA	21	34259861	34325754	+	not_in_ref	not_in_ref	not_in_ref	not_in_ref	not_in_ref	no_EG	j	ENST00000362077	-4.79452	-0.788169	11.9968	0.000532931	0.0262489	-
MSTRG.26534.12	NA	3	15560747	15601185	-	not_in_ref	not_in_ref	not_in_ref	not_in_ref	not_in_ref	no_EG	j	ENST00000321169	6.7599	1.73091	11.9703	0.000540558	0.0265869	-
ENST00000396913	ENSG00000107537	10	13277796	13299763	-	PHYH-002	protein_coding	ENSG00000107537	PHYH	protein_coding	5264	E	ENST00000396913	7.32378	0.0352919	11.9555	0.00054486	0.0267606	-
ENST00000409434	ENSG00000115514	2	99321534	99336333	-	TXNDC9-002	protein_coding	ENSG00000115514	TXNDC9	protein_coding	10190	E	ENST00000409434	-3.46354	-0.136626	11.9382	0.000549931	0.026954	-
ENST00000369038	ENSG00000143382	1	150552088	150560937	+	ADAMTSL4-001	protein_coding	ENSG00000143382	ADAMTSL4	protein_coding	54507	E	ENST00000369038	8.95372	3.20954	11.9368	0.000550351	0.026954	-
MSTRG.2391.8	NA	1	149390638	149492768	+	not_in_ref	not_in_ref	not_in_ref	not_in_ref	not_in_ref	no_EG	j	ENST00000621744	10.3329	3.24644	11.9139	0.000557161	0.0272491	-
ENST00000611016	ENSG00000168477	6	32041155	32062484	-	TNXB-201	protein_coding	ENSG00000168477	TNXB	protein_coding	7148	E	ENST00000611016	7.75569	3.25304	11.9092	0.000558584	0.027258	-
ENST00000392585	ENSG00000183484	14	105049397	105065445	-	GPR132-002	protein_coding	ENSG00000183484	GPR132	protein_coding	29933	E	ENST00000392585	8.47928	0.0530884	11.9081	0.000558913	0.027258	-
MSTRG.33453.20	NA	6	39905525	39934390	-	not_in_ref	not_in_ref	not_in_ref	not_in_ref	not_in_ref	no_EG	j	ENST00000373188	6.84073	4.64243	11.9021	0.000560718	0.0273077	-
ENST00000515356	ENSG00000250802	5	77139249	77148523	+	ZBED3-AS1-005	antisense	ENSG00000250802	ZBED3-AS1	antisense	NA	E	ENST00000515356	6.27979	-0.902307	11.8832	0.00056642	0.0275468	-
MSTRG.19291.15	NA	19	10777169	10831897	+	not_in_ref	not_in_ref	not_in_ref	not_in_ref	not_in_ref	no_EG	j	ENST00000389253	10.046	3.20152	11.877	0.000568303	0.0275997	-
MSTRG.7956.12	NA	12	991322	1495924	+	not_in_ref	not_in_ref	not_in_ref	not_in_ref	not_in_ref	no_EG	j	ENST00000546231	6.96727	1.11326	11.8606	0.000573348	0.0278058	-
ENST00000528964	ENSG00000175634	11	67428504	67435344	+	RPS6KB2-005	nonsense_mediated_decay	ENSG00000175634	RPS6KB2	protein_coding	6199	E	ENST00000528964	5.30467	0.541549	11.8546	0.000575176	0.0278136	-
ENST00000265343	ENSG00000072364	5	132875379	132963634	-	AFF4-001	protein_coding	ENSG00000072364	AFF4	protein_coding	27125	E	ENST00000265343	5.3931	4.26344	11.8515	0.000576163	0.0278136	-
ENST00000542471	ENSG00000176473	14	100382000	100530290	+	WDR25-006	protein_coding	ENSG00000176473	WDR25	protein_coding	79446	E	ENST00000542471	7.13989	0.364313	11.8501	0.000576586	0.0278136	-
ENST00000381418	ENSG00000168453	8	22114415	22131868	-	HR-001	protein_coding	ENSG00000168453	HR	protein_coding	55806	E	ENST00000381418	7.15559	0.426266	11.8497	0.000576713	0.0278136	-
ENST00000440030	ENSG00000235559	6	28783633	28784004	-	NOP56P1-001	processed_pseudogene	ENSG00000235559	NOP56P1	processed_pseudogene	NA	E	ENST00000440030	7.35936	-1.01779	11.8462	0.000577798	0.0278273	-
MSTRG.31976.2	NA	5	140245070	140258911	-	not_in_ref	not_in_ref	not_in_ref	not_in_ref	not_in_ref	no_EG	j	ENST00000261813	9.46973	1.18355	11.8415	0.000579262	0.0278591	-
MSTRG.297.9	NA	1	10399516	10420509	+	not_in_ref	not_in_ref	not_in_ref	not_in_ref	not_in_ref	no_EG	j	ENST00000270776	2.41022	2.14705	11.8372	0.000580604	0.027885	-
MSTRG.16312.21	NA	17	18858130	18931229	+	not_in_ref	not_in_ref	not_in_ref	not_in_ref	not_in_ref	no_EG	j	ENST00000268835	5.06554	2.10336	11.8183	0.000586514	0.02813	-
MSTRG.6520.1	NA	11	59636707	59666960	-	not_in_ref	not_in_ref	not_in_ref	not_in_ref	not_in_ref	no_EG	j	ENST00000300146	8.47936	2.74803	11.8081	0.000589724	0.0281916	-
ENST00000419198	ENSG00000100908	14	24138965	24141585	-	EMC9-003	protein_coding	ENSG00000100908	EMC9	protein_coding	51016	E	ENST00000419198	7.1784	0.119241	11.8079	0.000589797	0.0281916	-
MSTRG.3158.6	NA	1	182854041	182887747	+	not_in_ref	not_in_ref	not_in_ref	not_in_ref	not_in_ref	no_EG	j	ENST00000367549	-4.37772	4.07165	11.8065	0.000590234	0.0281916	-
ENST00000337130	ENSG00000169764	2	63841710	63891562	+	UGP2-001	protein_coding	ENSG00000169764	UGP2	protein_coding	7360	E	ENST00000337130	8.43146	3.57377	11.8033	0.000591245	0.0282011	-
ENST00000263864	ENSG00000118640	2	85577491	85582031	+	VAMP8-001	protein_coding	ENSG00000118640	VAMP8	protein_coding	8673	E	ENST00000263864	3.96663	0.0230097	11.7987	0.000592721	0.0282103	-
ENST00000519746	ENSG00000197226	5	179862066	179871805	-	TBC1D9B-005	protein_coding	ENSG00000197226	TBC1D9B	protein_coding	23061	E	ENST00000519746	7.1862	4.84222	11.7976	0.000593063	0.0282103	-
ENST00000483667	ENSG00000172046	3	49110013	49110757	-	USP19-017	processed_transcript	ENSG00000172046	USP19	protein_coding	10869	noCuffcomp	noCuffcomp	6.80611	-0.66595	11.7874	0.000596317	0.0283263	-
ENST00000587843	ENSG00000067836	16	4796969	4802633	-	ROGDI-002	nonsense_mediated_decay	ENSG00000067836	ROGDI	protein_coding	79641	E	ENST00000587843	6.59373	-0.383741	11.7786	0.000599141	0.0284215	-
MSTRG.15591.9	NA	16	84177861	84185549	-	not_in_ref	not_in_ref	not_in_ref	not_in_ref	not_in_ref	no_EG	j	ENST00000341690	-5.04924	1.7116	11.7659	0.000603243	0.0285771	-
ENST00000436743	ENSG00000203747	1	161541765	161550623	-	FCGR3A-201	protein_coding	ENSG00000203747	FCGR3A	protein_coding	2214	E	ENST00000436743	6.74906	0.565352	11.7491	0.000608717	0.0287646	-
MSTRG.14634.1	NA	16	23061406	23108186	-	not_in_ref	not_in_ref	not_in_ref	not_in_ref	not_in_ref	no_EG	j	ENST00000219689	4.51681	1.54988	11.7487	0.000608859	0.0287646	-
MSTRG.782.6	NA	1	31908653	31938297	-	not_in_ref	not_in_ref	not_in_ref	not_in_ref	not_in_ref	no_EG	j	ENST00000532001	5.78604	0.756305	11.7388	0.000612099	0.0288784	-
ENST00000449319	ENSG00000176973	11	65572462	65574190	+	FAM89B-002	protein_coding	ENSG00000176973	FAM89B	protein_coding	23625	E	ENST00000449319	5.65249	1.13377	11.7323	0.00061423	0.0289397	-
ENST00000462775	ENSG00000075391	1	178341471	178484147	+	RASAL2-001	protein_coding	ENSG00000075391	RASAL2	protein_coding	NA	E	ENST00000462775	3.35858	2.63724	11.7144	0.000620177	0.0291803	-
ENST00000266304	ENSG00000167074	22	41381929	41399326	+	TEF-001	protein_coding	ENSG00000167074	TEF	protein_coding	7008	E	ENST00000266304	9.15478	5.2249	11.7033	0.00062389	0.0293152	-
ENST00000333082	ENSG00000125818	20	1113263	1167782	+	PSMF1-201	protein_coding	ENSG00000125818	PSMF1	protein_coding	9491	E	ENST00000333082	9.21583	1.24627	11.6839	0.000630428	0.0295429	-
MSTRG.21390.5	NA	2	33583657	33599265	-	not_in_ref	not_in_ref	not_in_ref	not_in_ref	not_in_ref	no_EG	j	ENST00000238823	8.67791	3.14431	11.6839	0.000630436	0.0295429	-
MSTRG.26270.3	NA	22	50201075	50217614	+	not_in_ref	not_in_ref	not_in_ref	not_in_ref	not_in_ref	no_EG	j	ENST00000380903	6.89377	-0.633326	11.6698	0.000635228	0.0297145	-
ENST00000486194	ENSG00000204642	6	29723504	29724352	+	HLA-F-010	processed_transcript	ENSG00000204642	HLA-F	protein_coding	3134	E	ENST00000486194	5.24817	-0.269623	11.6681	0.00063581	0.0297145	-
ENST00000412516	ENSG00000169084	X	2243062	2500973	-	DHRSX-004	protein_coding	ENSG00000169084	DHRSX	protein_coding	207063	E	ENST00000412516	6.7819	-0.783435	11.6578	0.000639326	0.0298387	-
MSTRG.5964.1	NA	11	8964617	8977582	+	not_in_ref	not_in_ref	not_in_ref	not_in_ref	not_in_ref	no_EG	j	ENST00000525484	-7.12965	-0.649273	11.6463	0.000643305	0.0299841	-
ENST00000358029	ENSG00000124222	20	58651879	58679526	+	STX16-010	protein_coding	ENSG00000124222	STX16	protein_coding	8675	E	ENST00000358029	8.36835	0.987651	11.6292	0.000649257	0.0302009	-
MSTRG.21304.8	NA	2	28393144	28417312	+	not_in_ref	not_in_ref	not_in_ref	not_in_ref	not_in_ref	no_EG	j	ENST00000264716	9.67819	3.53368	11.6271	0.000649967	0.0302009	-
ENST00000263856	ENSG00000115561	2	86503431	86563477	-	CHMP3-001	protein_coding	ENSG00000115561	CHMP3	protein_coding	100526767;51652	E	ENST00000263856	7.82729	4.38115	11.6254	0.000650566	0.0302009	-
ENST00000614444	ENSG00000086848	11	111786256	111871533	-	ALG9-001	protein_coding	ENSG00000086848	ALG9	protein_coding	79796	E	ENST00000614444	6.8543	0.783357	11.6186	0.000652943	0.0302708	-
ENST00000392541	ENSG00000154518	2	175178145	175181663	-	ATP5G3-003	protein_coding	ENSG00000154518	ATP5G3	protein_coding	NA	E	ENST00000392541	7.05666	0.856313	11.6125	0.000655091	0.0303298	-
ENST00000613904	ENSG00000129696	8	33498509	33513185	-	TTI2-201	protein_coding	ENSG00000129696	TTI2	protein_coding	80185	E	ENST00000613904	2.85956	-0.8302	11.5711	0.000669831	0.030971	-
ENST00000559910	ENSG00000100938	14	24232636	24239204	+	GMPR2-007	protein_coding	ENSG00000100938	GMPR2	protein_coding	51292	E	ENST00000559910	-5.82912	2.20657	11.568	0.000670965	0.0309822	-
MSTRG.23419.19	NA	2	202299748	202303666	+	not_in_ref	not_in_ref	not_in_ref	not_in_ref	not_in_ref	no_EG	j	ENST00000264279	8.22022	1.26244	11.5603	0.000673748	0.0310601	-
ENST00000396033	ENSG00000150093	10	32900319	32957894	-	ITGB1-201	protein_coding	ENSG00000150093	ITGB1	protein_coding	3688	E	ENST00000396033	-4.36994	5.04969	11.5584	0.000674443	0.0310601	-
ENST00000546466	ENSG00000257727	12	56309842	56311312	-	CNPY2-011	nonsense_mediated_decay	ENSG00000257727	CNPY2	protein_coding	10330	E	ENST00000546466	4.10181	-0.888575	11.5538	0.000676093	0.0310949	-
MSTRG.21482.9	NA	2	42048774	42058528	+	not_in_ref	not_in_ref	not_in_ref	not_in_ref	not_in_ref	no_EG	j	ENST00000401498	8.24362	3.3245	11.5394	0.000681381	0.0312919	-
MSTRG.17090.5	NA	17	44395297	44474890	-	not_in_ref	not_in_ref	not_in_ref	not_in_ref	not_in_ref	no_EG	j	ENST00000590041	7.64778	1.97738	11.5372	0.000682178	0.0312919	-
MSTRG.11837.21	NA	14	73275218	73458502	-	not_in_ref	not_in_ref	not_in_ref	not_in_ref	not_in_ref	no_EG	j	ENST00000555238	6.97158	2.86593	11.5176	0.00068939	0.031581	-
MSTRG.23366.4	NA	2	200973883	201071645	-	not_in_ref	not_in_ref	not_in_ref	not_in_ref	not_in_ref	no_EG	j	ENST00000286181	8.36387	2.60032	11.5052	0.000694005	0.0317505	-
ENST00000230538	ENSG00000112769	6	112108760	112254715	-	LAMA4-001	protein_coding	ENSG00000112769	LAMA4	protein_coding	3910	E	ENST00000230538	4.9779	3.56479	11.4981	0.000696659	0.03183	-
ENST00000230431	ENSG00000112667	6	43225629	43229484	-	DNPH1-001	protein_coding	ENSG00000112667	DNPH1	protein_coding	10591	E	ENST00000230431	5.19457	2.52845	11.49	0.000699726	0.0319281	-
ENST00000395812	ENSG00000153113	5	96662237	96774683	+	CAST-011	protein_coding	ENSG00000153113	CAST	protein_coding	831	E	ENST00000395812	7.55326	2.40472	11.4852	0.000701535	0.0319686	-
ENST00000159111	ENSG00000127663	19	4969121	5153595	+	KDM4B-001	protein_coding	ENSG00000127663	KDM4B	protein_coding	23030	E	ENST00000159111	-3.96254	2.83613	11.4505	0.000714748	0.0325281	-
ENST00000395757	ENSG00000072310	17	17812073	17819951	-	SREBF1-004	protein_coding	ENSG00000072310	SREBF1	protein_coding	6720	E	ENST00000395757	3.50363	2.9192	11.4334	0.000721353	0.0327857	-
ENST00000361956	ENSG00000198732	14	69879416	70030727	+	SMOC1-001	protein_coding	ENSG00000198732	SMOC1	protein_coding	64093	E	ENST00000361956	8.17702	1.089	11.4257	0.000724366	0.0328796	-
ENST00000555365	ENSG00000100445	14	24439902	24442765	-	SDR39U1-018	protein_coding	ENSG00000100445	SDR39U1	protein_coding	56948	E	ENST00000555365	12.0398	1.10526	11.4154	0.000728366	0.0329677	-
ENST00000374975	ENSG00000198502	6	32517343	32530287	-	HLA-DRB5-001	protein_coding	ENSG00000198502	HLA-DRB5	protein_coding	3127	E	ENST00000374975	5.74305	2.75055	11.4135	0.000729137	0.0329677	-
ENST00000480648	ENSG00000204852	12	110614168	110649085	+	TCTN1-002	nonsense_mediated_decay	ENSG00000204852	TCTN1	protein_coding	79600	E	ENST00000480648	7.09978	0.34294	11.4134	0.000729155	0.0329677	-
ENST00000434854	ENSG00000089682	X	107069310	107116766	-	RBM41-008	protein_coding	ENSG00000089682	RBM41	protein_coding	55285	E	ENST00000434854	6.96281	-0.728235	11.3947	0.000736544	0.0332585	-
ENST00000247291	ENSG00000126878	9	131096542	131123145	+	AIF1L-001	protein_coding	ENSG00000126878	AIF1L	protein_coding	83543	E	ENST00000247291	7.48319	2.82154	11.3795	0.000742601	0.0334593	-
MSTRG.28678.2	NA	3	190305707	190322411	-	not_in_ref	not_in_ref	not_in_ref	not_in_ref	not_in_ref	no_EG	j	ENST00000295522	6.04497	3.35588	11.3787	0.000742918	0.0334593	-
ENST00000602318	ENSG00000134248	1	110401253	110407708	-	LAMTOR5-007	protein_coding	ENSG00000134248	LAMTOR5	protein_coding	10542	noCuffcomp	noCuffcomp	5.35091	0.728956	11.37	0.000746411	0.033573	-
MSTRG.2678.1	NA	1	156290089	156295610	-	not_in_ref	not_in_ref	not_in_ref	not_in_ref	not_in_ref	no_EG	j	ENST00000614643	5.50399	0.367238	11.3621	0.000749582	0.033672	-
MSTRG.32220.5	NA	5	153991703	154038769	-	not_in_ref	not_in_ref	not_in_ref	not_in_ref	not_in_ref	no_EG	j	ENST00000520667	7.3043	1.83588	11.3521	0.000753615	0.0338095	-
ENST00000242209	ENSG00000122642	7	32957405	33006931	+	FKBP9-001	protein_coding	ENSG00000122642	FKBP9	protein_coding	11328	E	ENST00000242209	9.86757	3.57534	11.331	0.000762233	0.034152	-
ENST00000340020	ENSG00000186063	1	222668013	222712524	-	AIDA-001	protein_coding	ENSG00000186063	AIDA	protein_coding	64853	E	ENST00000340020	7.38013	1.93195	11.3188	0.000767249	0.0343324	-
MSTRG.7750.19	NA	11	122089106	122102017	-	not_in_ref	not_in_ref	not_in_ref	not_in_ref	not_in_ref	no_EG	j	ENST00000532890	7.58533	3.64914	11.3044	0.000773244	0.0345561	-
MSTRG.15004.24	NA	16	47660703	47700348	+	not_in_ref	not_in_ref	not_in_ref	not_in_ref	not_in_ref	no_EG	j	ENST00000566044	7.96651	1.45057	11.2942	0.000777497	0.0347016	-
MSTRG.5756.19	NA	11	870122	908594	-	not_in_ref	not_in_ref	not_in_ref	not_in_ref	not_in_ref	no_EG	j	ENST00000436108	2.07102	0.97537	11.2673	0.000788834	0.0351624	-
ENST00000370558	ENSG00000097033	1	86704576	86748184	+	SH3GLB1-001	protein_coding	ENSG00000097033	SH3GLB1	protein_coding	51100	E	ENST00000370558	9.80449	4.86653	11.253	0.000794939	0.035389	-
MSTRG.753.19	NA	1	29195952	29223215	-	not_in_ref	not_in_ref	not_in_ref	not_in_ref	not_in_ref	no_EG	j	ENST00000373791	-6.91482	0.760891	11.2501	0.000796173	0.0353986	-
MSTRG.7953.7	NA	12	753056	911443	+	not_in_ref	not_in_ref	not_in_ref	not_in_ref	not_in_ref	no_EG	j	ENST00000530271	4.67116	7.7639	11.2396	0.000800721	0.0355553	-
ENST00000216259	ENSG00000100417	22	41576894	41589890	-	PMM1-001	protein_coding	ENSG00000100417	PMM1	protein_coding	5372	E	ENST00000216259	4.7637	4.07447	11.2245	0.000807234	0.0357987	-
MSTRG.890.10	NA	1	36225429	36305350	+	not_in_ref	not_in_ref	not_in_ref	not_in_ref	not_in_ref	no_EG	j	ENST00000469141	4.53808	4.14143	11.2206	0.000808964	0.0358297	-
ENST00000398357	ENSG00000214455	13	45390353	45391267	-	RCN1P2-001	processed_pseudogene	ENSG00000214455	RCN1P2	processed_pseudogene	NA	E	ENST00000398357	-3.91201	3.03325	11.2131	0.000812232	0.0359286	-
ENST00000423313	ENSG00000235750	1	175156987	175192793	-	KIAA0040-002	protein_coding	ENSG00000235750	KIAA0040	protein_coding	9674	E	ENST00000423313	3.14496	1.90716	11.2016	0.000817259	0.036105	-
ENST00000590869	ENSG00000129351	19	10683756	10689492	+	ILF3-023	protein_coding	ENSG00000129351	ILF3	protein_coding	3609	E	ENST00000590869	8.40939	-0.256511	11.1985	0.000818615	0.0361189	-
MSTRG.4598.6	NA	10	47967487	47991850	-	not_in_ref	not_in_ref	not_in_ref	not_in_ref	not_in_ref	no_EG	j	ENST00000613389	5.2526	1.76602	11.196	0.000819723	0.0361219	-
ENST00000479054	ENSG00000010322	3	52455118	52493068	+	NISCH-001	protein_coding	ENSG00000010322	NISCH	protein_coding	11188	E	ENST00000479054	-7.20792	2.75466	11.1791	0.00082725	0.0364074	-
ENST00000454497	ENSG00000164164	4	145133649	145179680	-	OTUD4-001	protein_coding	ENSG00000164164	OTUD4	protein_coding	54726	E	ENST00000454497	3.41741	3.84211	11.1673	0.000832499	0.0365868	-
ENST00000381846	ENSG00000121897	4	39459072	39477621	+	LIAS-002	protein_coding	ENSG00000121897	LIAS	protein_coding	11019	E	ENST00000381846	6.60886	2.05491	11.1653	0.000833433	0.0365868	-
ENST00000308271	ENSG00000090686	1	21678579	21783606	-	USP48-001	protein_coding	ENSG00000090686	USP48	protein_coding	84196	E	ENST00000308271	7.69127	0.42886	11.1394	0.000845113	0.0370527	-
ENST00000368034	ENSG00000122223	1	160830160	160862855	-	CD244-001	protein_coding	ENSG00000122223	CD244	protein_coding	51744	E	ENST00000368034	6.8408	-0.637899	11.132	0.000848497	0.0371541	-
MSTRG.19953.8	NA	19	35730727	35738878	+	not_in_ref	not_in_ref	not_in_ref	not_in_ref	not_in_ref	no_EG	j	ENST00000420124	-5.71729	1.8969	11.1117	0.000857834	0.0375156	-
ENST00000394990	ENSG00000186577	6	34246395	34249040	-	C6orf1-003	protein_coding	ENSG00000186577	C6orf1	protein_coding	221491	E	ENST00000394990	5.10587	-0.0286394	11.1003	0.000863154	0.0377008	-
ENST00000393587	ENSG00000126903	X	154487343	154490663	-	SLC10A3-002	protein_coding	ENSG00000126903	SLC10A3	protein_coding	8273	E	ENST00000393587	6.95247	2.24009	11.0934	0.000866344	0.0377926	-
ENST00000355354	ENSG00000196776	3	108043299	108091025	-	CD47-002	protein_coding	ENSG00000196776	CD47	protein_coding	961	E	ENST00000355354	8.47473	3.43544	11.0908	0.00086758	0.0377991	-
MSTRG.20585.8	NA	19	50395109	50418016	+	not_in_ref	not_in_ref	not_in_ref	not_in_ref	not_in_ref	no_EG	j	ENST00000613923	6.6067	-0.484861	11.0734	0.000875766	0.0380807	-
MSTRG.22491.7	NA	2	113598384	113599041	+	not_in_ref	not_in_ref	not_in_ref	not_in_ref	not_in_ref	no_EG	j	ENST00000453662	6.79765	0.140517	11.0724	0.000876238	0.0380807	-
ENST00000526005	ENSG00000123444	11	47572197	47578956	-	KBTBD4-003	protein_coding	ENSG00000123444	KBTBD4	protein_coding	55709	E	ENST00000526005	7.10984	1.97228	11.067	0.000878758	0.0381425	-
ENST00000462949	ENSG00000111785	12	106774714	106887290	+	RIC8B-003	nonsense_mediated_decay	ENSG00000111785	RIC8B	protein_coding	55188	E	ENST00000462949	5.72408	0.902297	11.0357	0.000893737	0.0387442	-
MSTRG.9658.24	NA	12	109234723	109268007	+	not_in_ref	not_in_ref	not_in_ref	not_in_ref	not_in_ref	no_EG	j	ENST00000338432	6.41982	6.23616	11.0255	0.000898664	0.0389092	-
ENST00000394934	ENSG00000197746	10	71816299	71851325	-	PSAP-201	protein_coding	ENSG00000197746	PSAP	protein_coding	5660	E	ENST00000394934	-5.19842	7.55592	11.0146	0.000903988	0.039091	-
ENST00000589389	ENSG00000140632	16	4803203	4846210	-	GLYR1-005	protein_coding	ENSG00000140632	GLYR1	protein_coding	84656	E	ENST00000589389	9.74593	3.64464	10.9811	0.000920451	0.0397534	-
MSTRG.36705.14	NA	7	151076655	151080615	-	not_in_ref	not_in_ref	not_in_ref	not_in_ref	not_in_ref	no_EG	j	ENST00000297532	6.1687	1.67679	10.977	0.000922492	0.0397921	-
ENST00000284957	ENSG00000154710	7	66740733	66811464	+	RABGEF1-001	protein_coding	ENSG00000154710	RABGEF1	protein_coding	27342	E	ENST00000284957	4.70776	3.46359	10.9679	0.000927057	0.03992	-
MSTRG.11166.4	NA	14	24114777	24125282	+	not_in_ref	not_in_ref	not_in_ref	not_in_ref	not_in_ref	no_EG	j	ENST00000446197	9.38236	2.5773	10.9665	0.000927757	0.03992	-
ENST00000613459	ENSG00000113716	5	150000046	150053142	+	HMGXB3-201	protein_coding	ENSG00000113716	HMGXB3	protein_coding	22993	E	ENST00000613459	7.60611	2.30324	10.9627	0.000929642	0.0399516	-
MSTRG.7698.12	NA	11	119168875	119184016	+	not_in_ref	not_in_ref	not_in_ref	not_in_ref	not_in_ref	no_EG	j	ENST00000409109	5.16218	2.53184	10.9411	0.000940539	0.0403201	-
ENST00000597836	ENSG00000099330	19	17226615	17229165	+	OCEL1-009	protein_coding	ENSG00000099330	OCEL1	protein_coding	79629	E	ENST00000597836	6.4852	0.873634	10.9396	0.000941299	0.0403201	-
MSTRG.3497.4	NA	1	209614875	209651277	-	not_in_ref	not_in_ref	not_in_ref	not_in_ref	not_in_ref	no_EG	j	ENST00000356082	3.05222	2.62419	10.9388	0.0009417	0.0403201	-
ENST00000376809	ENSG00000206503	6	29942470	29945884	+	HLA-A-201	protein_coding	ENSG00000206503	HLA-A	protein_coding	3105	noCuffcomp	noCuffcomp	4.83258	7.47742	10.915	0.000953908	0.0407925	-
MSTRG.34071.3	NA	6	113859185	113863409	+	not_in_ref	not_in_ref	not_in_ref	not_in_ref	not_in_ref	no_EG	j	ENST00000612661	7.76112	3.06248	10.9016	0.000960809	0.0410371	-
ENST00000500487	ENSG00000247765	15	21298233	21325241	-	RP11-32B5.7-001	lincRNA	ENSG00000247765	RP11-32B5.7	lincRNA	NA	E	ENST00000500487	-3.68474	0.279153	10.895	0.000964227	0.0411325	-
ENST00000615951	ENSG00000248333	1	1635738	1659012	-	CDK11B-002	nonsense_mediated_decay	ENSG00000248333	CDK11B	protein_coding	984	E	ENST00000615951	2.39769	1.61081	10.884	0.000969985	0.041323	-
ENST00000535698	ENSG00000060237	12	862235	880814	+	WNK1-015	protein_coding	ENSG00000060237	WNK1	protein_coding	65125	noCuffcomp	noCuffcomp	5.52947	0.0201999	10.8819	0.000971075	0.041323	-
MSTRG.32995.5	NA	6	27397555	27403852	+	not_in_ref	not_in_ref	not_in_ref	not_in_ref	not_in_ref	no_EG	j	ENST00000461521	4.08082	1.17929	10.8789	0.000972673	0.0413404	-
ENST00000353739	ENSG00000137075	9	36336396	36400299	-	RNF38-002	protein_coding	ENSG00000137075	RNF38	protein_coding	152006	E	ENST00000353739	-4.1766	4.41523	10.8673	0.000978764	0.0415484	-
MSTRG.26007.5	NA	22	38705949	38732239	+	not_in_ref	not_in_ref	not_in_ref	not_in_ref	not_in_ref	no_EG	j	ENST00000216044	3.70996	3.26992	10.8611	0.000982062	0.0416375	-
ENST00000361101	ENSG00000108669	17	78674048	78782294	-	CYTH1-201	protein_coding	ENSG00000108669	CYTH1	protein_coding	9267	E	ENST00000361101	-8.18694	1.10003	10.8454	0.000990393	0.0419395	-
MSTRG.1341.24	NA	1	58480923	58533431	-	not_in_ref	not_in_ref	not_in_ref	not_in_ref	not_in_ref	no_EG	j	ENST00000485760	6.77702	0.797471	10.8314	0.000997933	0.0422073	-
MSTRG.5645.3	NA	10	126425016	126459466	-	not_in_ref	not_in_ref	not_in_ref	not_in_ref	not_in_ref	no_EG	j	ENST00000284694	6.02717	-0.48607	10.8246	0.00100161	0.0423037	-
ENST00000317501	ENSG00000140538	15	87977364	88256159	-	NTRK3-002	protein_coding	ENSG00000140538	NTRK3	protein_coding	4916	noCuffcomp	noCuffcomp	6.95754	0.416364	10.8227	0.00100265	0.0423037	-
MSTRG.39119.1	NA	9	72351237	72364664	-	not_in_ref	not_in_ref	not_in_ref	not_in_ref	not_in_ref	no_EG	j	ENST00000376962	6.23232	1.37112	10.8145	0.0010071	0.0424249	-
ENST00000429957	ENSG00000197785	1	1517621	1522780	+	ATAD3A-005	retained_intron	ENSG00000197785	ATAD3A	protein_coding	55210	E	ENST00000429957	5.43692	-0.165188	10.8129	0.00100797	0.0424249	-
ENST00000463847	ENSG00000156639	6	38142997	38152995	+	ZFAND3-005	processed_transcript	ENSG00000156639	ZFAND3	protein_coding	60685	E	ENST00000463847	11.7625	-1.65406	10.8064	0.00101149	0.0424884	-
ENST00000263774	ENSG00000213619	11	47579010	47584562	+	NDUFS3-001	protein_coding	ENSG00000213619	NDUFS3	protein_coding	4722	E	ENST00000263774	5.59063	2.71706	10.8056	0.00101192	0.0424884	-
MSTRG.33157.1	NA	6	31268749	31357187	-	not_in_ref	not_in_ref	not_in_ref	not_in_ref	not_in_ref	no_EG	j	ENST00000412585	-4.02258	5.31931	10.8011	0.00101442	0.0425421	-
MSTRG.4300.2	NA	10	23095640	23121964	+	not_in_ref	not_in_ref	not_in_ref	not_in_ref	not_in_ref	no_EG	j	ENST00000376510	5.38049	1.20385	10.7891	0.00102099	0.0427412	-
MSTRG.28667.16	NA	3	186783597	186789881	+	not_in_ref	not_in_ref	not_in_ref	not_in_ref	not_in_ref	no_EG	j	ENST00000425053	8.37737	4.24041	10.7879	0.00102163	0.0427412	-
ENST00000480046	ENSG00000165055	7	128476754	128506602	+	METTL2B-002	protein_coding	ENSG00000165055	METTL2B	protein_coding	55798	E	ENST00000480046	8.39105	1.93487	10.7844	0.00102358	0.0427471	-
ENST00000463574	ENSG00000234745	6	31355122	31355802	-	HLA-B-005	retained_intron	ENSG00000234745	HLA-B	protein_coding	3106	E	ENST00000463574	5.50537	3.91932	10.7832	0.00102424	0.0427471	-
MSTRG.38787.13	NA	9	33384950	33402466	-	not_in_ref	not_in_ref	not_in_ref	not_in_ref	not_in_ref	no_EG	j	ENST00000297988	5.52518	2.77653	10.7739	0.00102942	0.0428831	-
ENST00000334538	ENSG00000186866	21	45263928	45287898	-	POFUT2-002	nonsense_mediated_decay	ENSG00000186866	POFUT2	protein_coding	23275	E	ENST00000334538	-10.0318	1.13591	10.7729	0.00102996	0.0428831	-
ENST00000464747	ENSG00000116044	2	177230308	177392697	-	NFE2L2-003	protein_coding	ENSG00000116044	NFE2L2	protein_coding	4780	E	ENST00000464747	1.47122	0.64275	10.7693	0.00103196	0.0429147	-
ENST00000517654	ENSG00000153310	8	129841484	130016451	-	FAM49B-009	protein_coding	ENSG00000153310	FAM49B	protein_coding	51571	E	ENST00000517654	-4.09584	1.34669	10.7643	0.00103479	0.0429807	-
MSTRG.28919.28	NA	4	3422930	3432238	+	not_in_ref	not_in_ref	not_in_ref	not_in_ref	not_in_ref	no_EG	j	ENST00000344733	5.60781	0.0329395	10.7442	0.00104607	0.0433976	-
ENST00000395183	ENSG00000138639	4	85778706	86001223	+	ARHGAP24-005	protein_coding	ENSG00000138639	ARHGAP24	protein_coding	83478	E	ENST00000395183	3.85404	1.90292	10.6942	0.00107474	0.0445339	-
ENST00000447609	ENSG00000048540	12	16548421	16606800	-	LMO3-010	protein_coding	ENSG00000048540	LMO3	protein_coding	55885	E	ENST00000447609	6.01236	4.85534	10.6708	0.00108838	0.0450451	-
ENST00000473512	ENSG00000133597	7	140679155	140695081	+	ADCK2-006	protein_coding	ENSG00000133597	ADCK2	protein_coding	90956	E	ENST00000473512	5.07706	1.19673	10.6608	0.0010943	0.0452176	-
MSTRG.33562.6	NA	6	44127720	44155388	+	not_in_ref	not_in_ref	not_in_ref	not_in_ref	not_in_ref	no_EG	j	ENST00000259746	8.27623	0.80878	10.6594	0.00109515	0.0452176	-
MSTRG.21442.20	NA	2	32436075	32611581	+	not_in_ref	not_in_ref	not_in_ref	not_in_ref	not_in_ref	no_EG	j	ENST00000421745	-4.50652	1.13998	10.6506	0.00110035	0.0453785	-
ENST00000369272	ENSG00000131781	1	147186261	147225309	-	FMO5-004	protein_coding	ENSG00000131781	FMO5	protein_coding	2330	E	ENST00000369272	5.52355	-0.273563	10.6442	0.00110418	0.0454472	-
MSTRG.11868.3	NA	14	74498211	74612321	-	not_in_ref	not_in_ref	not_in_ref	not_in_ref	not_in_ref	no_EG	j	ENST00000261978	9.56373	2.80162	10.6434	0.00110464	0.0454472	-
ENST00000392449	ENSG00000152894	6	128321403	128520565	-	PTPRK-008	nonsense_mediated_decay	ENSG00000152894	PTPRK	protein_coding	5796	E	ENST00000392449	5.09238	-1.0861	10.6341	0.00111024	0.0456236	-
ENST00000409764	ENSG00000172115	7	25123444	25125260	-	CYCS-003	protein_coding	ENSG00000172115	CYCS	protein_coding	NA	E	ENST00000409764	3.4102	4.82316	10.6305	0.0011124	0.0456585	-
MSTRG.7355.3	NA	11	94415613	94493757	-	not_in_ref	not_in_ref	not_in_ref	not_in_ref	not_in_ref	no_EG	j	ENST00000323929	4.99777	1.74169	10.6105	0.00112446	0.0460989	-
ENST00000618101	ENSG00000119508	9	99821855	99866891	+	NR4A3-201	protein_coding	ENSG00000119508	NR4A3	protein_coding	8013	E	ENST00000618101	11.4246	2.03373	10.6062	0.00112712	0.0461535	-
MSTRG.2417.17	NA	1	150496428	150507599	+	not_in_ref	not_in_ref	not_in_ref	not_in_ref	not_in_ref	no_EG	j	ENST00000369064	6.61445	0.957535	10.5974	0.00113248	0.0463184	-
ENST00000521026	ENSG00000104419	8	133237176	133244503	-	NDRG1-008	retained_intron	ENSG00000104419	NDRG1	protein_coding	10397	E	ENST00000521026	9.05962	6.09668	10.5849	0.00114013	0.0465765	-
ENST00000317968	ENSG00000163110	4	94451902	94668223	+	PDLIM5-001	protein_coding	ENSG00000163110	PDLIM5	protein_coding	10611	E	ENST00000317968	1.63652	5.12967	10.5695	0.00114972	0.0469128	-
MSTRG.19098.15	NA	19	5648446	5668326	+	not_in_ref	not_in_ref	not_in_ref	not_in_ref	not_in_ref	no_EG	j	ENST00000292123	-3.20093	-0.360887	10.5461	0.00116431	0.0474526	-
ENST00000310496	ENSG00000169733	17	82047902	82051774	-	RFNG-001	protein_coding	ENSG00000169733	RFNG	protein_coding	5986	E	ENST00000310496	7.73794	1.20895	10.5328	0.00117272	0.0477392	-
MSTRG.2358.47	NA	1	148844613	148942375	+	not_in_ref	not_in_ref	not_in_ref	not_in_ref	not_in_ref	no_EG	j	ENST00000585156	-3.05073	-0.319674	10.494	0.00119766	0.0486698	-
ENST00000229570	ENSG00000111850	6	87322593	87342322	+	SMIM8-001	protein_coding	ENSG00000111850	SMIM8	protein_coding	57150	E	ENST00000229570	6.52373	0.953188	10.4928	0.00119838	0.0486698	-
ENST00000479015	ENSG00000101955	X	38149351	38160098	-	SRPX-001	processed_transcript	ENSG00000101955	SRPX	protein_coding	8406	noCuffcomp	noCuffcomp	7.39741	3.2076	10.4789	0.00120744	0.0489803	-
MSTRG.4786.7	NA	10	69180318	69209099	+	not_in_ref	not_in_ref	not_in_ref	not_in_ref	not_in_ref	no_EG	j	ENST00000359655	5.77657	1.59173	10.4663	0.00121569	0.0492573	-
ENST00000510138	ENSG00000215630	5	71197646	71208130	-	GUSBP9-001	unprocessed_pseudogene	ENSG00000215630	GUSBP9	unprocessed_pseudogene	NA	E	ENST00000510138	6.04014	-2.14668	10.4538	0.00122401	0.0495366	-
MSTRG.6994.6	NA	11	72109587	72112303	-	not_in_ref	not_in_ref	not_in_ref	not_in_ref	not_in_ref	no_EG	j	ENST00000227618	6.1492	1.24001	10.4503	0.00122627	0.0495703	-

## Sheet: ObCRC_Ob
Supplementary Data 2: Differential expression of adipocyte transcripts obese subjects affected or not by CRC, by RNASeq analysis.
TranscriptRecID	GeneID	Chr	Start	Stop	Strand	TranscriptName	TranscriptType	EnsG	GeneSymbol	GeneType	EntrezGeneID	cffmpType	cffmpNearestTranscript	logFC	logCPM	LR	PValue	FDR
MSTRG.29367.2	NA	4	55427972	55510066	-	not_in_ref	not_in_ref	not_in_ref	not_in_ref	not_in_ref	no_EG	j	ENST00000381322	-14.1453	2.53218	83.4877	6.41144e-20	2.22631e-15
ENST00000295802	ENSG00000042445	2	85342088	85354620	-	RETSAT-001	protein_coding	ENSG00000042445	RETSAT	protein_coding	54884	E	ENST00000295802	-15.4734	2.79111	79.759	4.22987e-19	7.3439e-15
MSTRG.31801.23	NA	5	131641714	131744659	-	not_in_ref	not_in_ref	not_in_ref	not_in_ref	not_in_ref	no_EG	j	ENST00000514667	-12.8066	2.92	69.201	8.89246e-17	1.02927e-12
ENST00000327238	ENSG00000155229	10	97458326	97498384	-	MMS19-018	protein_coding	ENSG00000155229	MMS19	protein_coding	64210	E	ENST00000327238	16.8327	0.723764	66.3964	3.68779e-16	2.88591e-12
MSTRG.15698.7	NA	16	88715346	88720387	-	not_in_ref	not_in_ref	not_in_ref	not_in_ref	not_in_ref	no_EG	j	ENST00000301015	14.1167	3.2609	66.1017	4.28241e-16	2.88591e-12
MSTRG.34861.1	NA	7	6333175	6403967	+	not_in_ref	not_in_ref	not_in_ref	not_in_ref	not_in_ref	no_EG	o	ENST00000356142	13.7567	2.59868	65.6485	5.38953e-16	2.88591e-12
MSTRG.25985.6	NA	22	38219316	38247997	-	not_in_ref	not_in_ref	not_in_ref	not_in_ref	not_in_ref	no_EG	j	ENST00000436674	-23.03	3.9849	65.4979	5.81769e-16	2.88591e-12
MSTRG.2480.1	NA	1	151364297	151372663	-	not_in_ref	not_in_ref	not_in_ref	not_in_ref	not_in_ref	no_EG	j	ENST00000426705	13.3312	2.96019	64.0974	1.18416e-15	5.13983e-12
ENST00000447382	ENSG00000196083	3	190514059	190651512	+	IL1RAP-005	protein_coding	ENSG00000196083	IL1RAP	protein_coding	3556	E	ENST00000447382	-10.6816	2.2777	60.4148	7.68334e-15	2.9644e-11
MSTRG.35535.3	NA	7	66987744	66995566	-	not_in_ref	not_in_ref	not_in_ref	not_in_ref	not_in_ref	no_EG	j	ENST00000246868	13.921	3.86977	59.4048	1.28354e-14	4.45698e-11
ENST00000262367	ENSG00000005339	16	3725054	3880726	-	CREBBP-001	protein_coding	ENSG00000005339	CREBBP	protein_coding	1387	E	ENST00000262367	-11.7464	3.10637	58.6055	1.92681e-14	6.0824e-11
MSTRG.12461.11	NA	14	105707118	105863862	-	not_in_ref	not_in_ref	not_in_ref	not_in_ref	not_in_ref	no_EG	j	ENST00000613516	12.9318	3.48649	55.087	1.15311e-13	3.33671e-10
MSTRG.15880.1	NA	17	3565444	3630339	-	not_in_ref	not_in_ref	not_in_ref	not_in_ref	not_in_ref	no_EG	j	ENST00000572705	-10.6109	0.566842	54.0943	1.91096e-13	5.10432e-10
MSTRG.24410.15	NA	20	34369416	34511338	+	not_in_ref	not_in_ref	not_in_ref	not_in_ref	not_in_ref	no_EG	j	ENST00000262650	-12.4218	3.45702	53.6417	2.40594e-13	5.96742e-10
ENST00000616577	ENSG00000133112	13	45333471	45341284	-	TPT1-201	protein_coding	ENSG00000133112	TPT1	protein_coding	7178	E	ENST00000616577	-7.71317	2.60873	53.4253	2.68609e-13	6.21812e-10
ENST00000503556	ENSG00000138640	4	88727426	88823231	-	FAM13A-006	protein_coding	ENSG00000138640	FAM13A	protein_coding	10144	E	ENST00000503556	-6.86814	2.6993	52.1459	5.15251e-13	1.11822e-09
MSTRG.30184.11	NA	4	122219469	122362741	+	not_in_ref	not_in_ref	not_in_ref	not_in_ref	not_in_ref	no_EG	j	ENST00000264501	-11.0083	1.64157	51.5933	6.82756e-13	1.39459e-09
ENST00000324894	ENSG00000130299	19	17337544	17342735	+	GTPBP3-004	protein_coding	ENSG00000130299	GTPBP3	protein_coding	84705	E	ENST00000324894	12.25	0.299791	50.5873	1.13981e-12	2.19882e-09
ENST00000597620	ENSG00000079435	19	42401816	42407226	-	LIPE-006	protein_coding	ENSG00000079435	LIPE	protein_coding	3991	noCuffcomp	noCuffcomp	14.2188	6.24109	49.8158	1.68879e-12	3.08639e-09
MSTRG.11931.40	NA	14	75882719	76083766	+	not_in_ref	not_in_ref	not_in_ref	not_in_ref	not_in_ref	no_EG	j	ENST00000298832	-8.62009	-0.409364	49.6244	1.86186e-12	3.23256e-09
ENST00000521015	ENSG00000134014	8	28090231	28191156	+	ELP3-010	protein_coding	ENSG00000134014	ELP3	protein_coding	55140	E	ENST00000521015	11.8449	2.80939	49.3169	2.17782e-12	3.60108e-09
ENST00000262039	ENSG00000078142	18	41955206	42087830	+	PIK3C3-001	protein_coding	ENSG00000078142	PIK3C3	protein_coding	NA	E	ENST00000262039	-7.16635	2.51855	49.2099	2.29982e-12	3.62995e-09
ENST00000480987	ENSG00000096746	10	68332076	68341287	+	HNRNPH3-011	processed_transcript	ENSG00000096746	HNRNPH3	protein_coding	3189	E	ENST00000480987	11.363	0.985754	48.1599	3.92844e-12	5.93092e-09
ENST00000382952	ENSG00000159692	4	1211448	1249112	-	CTBP1-003	protein_coding	ENSG00000159692	CTBP1	protein_coding	1487	E	ENST00000382952	11.0744	3.75395	47.8368	4.63208e-12	6.70184e-09
MSTRG.27481.8	NA	3	101576681	101594437	+	not_in_ref	not_in_ref	not_in_ref	not_in_ref	not_in_ref	no_EG	j	ENST00000265260	-11.642	2.17729	47.457	5.62247e-12	7.79459e-09
MSTRG.9832.7	NA	12	120127243	120190392	-	not_in_ref	not_in_ref	not_in_ref	not_in_ref	not_in_ref	no_EG	j	ENST00000300648	-8.58448	2.84891	47.3838	5.83629e-12	7.79459e-09
ENST00000381022	ENSG00000107186	9	13105712	13279564	-	MPDZ-201	protein_coding	ENSG00000107186	MPDZ	protein_coding	8777	E	ENST00000381022	11.2453	1.95277	47.0771	6.8249e-12	8.77732e-09
ENST00000375425	ENSG00000204356	6	31952229	31958852	-	NELFE-013	protein_coding	ENSG00000204356	NELFE	protein_coding	7936	E	ENST00000375425	11.8584	2.00679	46.7881	7.90921e-12	9.80855e-09
MSTRG.18317.19	NA	18	12817181	12862670	-	not_in_ref	not_in_ref	not_in_ref	not_in_ref	not_in_ref	no_EG	j	ENST00000591115	-11.4456	-0.141241	46.5082	9.12356e-12	1.09244e-08
MSTRG.28990.3	NA	4	8270499	8307071	+	not_in_ref	not_in_ref	not_in_ref	not_in_ref	not_in_ref	no_EG	j	ENST00000307358	-9.95462	2.43594	46.2402	1.04608e-11	1.2108e-08
MSTRG.5383.5	NA	10	102777947	102816240	+	not_in_ref	not_in_ref	not_in_ref	not_in_ref	not_in_ref	no_EG	j	ENST00000369889	-3.96015	3.31971	45.3676	1.63316e-11	1.82935e-08
MSTRG.26276.1	NA	22	50274979	50295432	-	not_in_ref	not_in_ref	not_in_ref	not_in_ref	not_in_ref	no_EG	j	ENST00000449103	-10.146	4.39211	45.2684	1.71796e-11	1.8642e-08
MSTRG.1715.2	NA	1	91680345	91886122	-	not_in_ref	not_in_ref	not_in_ref	not_in_ref	not_in_ref	no_EG	j	ENST00000533089	12.2862	2.59867	44.9241	2.04821e-11	2.15522e-08
MSTRG.12765.5	NA	15	25337253	25438959	-	not_in_ref	not_in_ref	not_in_ref	not_in_ref	not_in_ref	no_EG	j	ENST00000566215	24.0094	0.36625	44.8568	2.11982e-11	2.16496e-08
ENST00000423585	ENSG00000154856	18	10454836	10487896	+	APCDD1-002	nonsense_mediated_decay	ENSG00000154856	APCDD1	protein_coding	NA	E	ENST00000423585	-5.44754	0.798569	44.4155	2.65574e-11	2.6348e-08
ENST00000558498	ENSG00000104043	15	49858238	49876695	-	ATP8B4-006	processed_transcript	ENSG00000104043	ATP8B4	protein_coding	79895	E	ENST00000558498	12.6303	1.38241	43.8924	3.46936e-11	3.27628e-08
ENST00000496365	ENSG00000068438	X	48479038	48486311	+	FTSJ1-007	processed_transcript	ENSG00000068438	FTSJ1	protein_coding	24140	noCuffcomp	noCuffcomp	11.2085	0.128974	43.8802	3.49103e-11	3.27628e-08
MSTRG.33571.13	NA	6	44254206	44256873	-	not_in_ref	not_in_ref	not_in_ref	not_in_ref	not_in_ref	no_EG	j	ENST00000619636	-10.7679	2.31088	43.1635	5.03521e-11	4.60112e-08
ENST00000394110	ENSG00000112640	6	42984553	43012342	+	PPP2R5D-004	protein_coding	ENSG00000112640	PPP2R5D	protein_coding	5528	E	ENST00000394110	-8.3843	1.62588	43.0446	5.35057e-11	4.67464e-08
MSTRG.16854.4	NA	17	38870061	38921761	+	not_in_ref	not_in_ref	not_in_ref	not_in_ref	not_in_ref	no_EG	j	ENST00000435347	11.6214	5.27347	43.0321	5.38492e-11	4.67464e-08
MSTRG.2661.59	NA	1	155749599	155853797	-	not_in_ref	not_in_ref	not_in_ref	not_in_ref	not_in_ref	no_EG	j	ENST00000368331	-4.99519	2.79436	42.2325	8.10432e-11	6.86377e-08
ENST00000262971	ENSG00000105229	19	4007646	4039386	+	PIAS4-001	protein_coding	ENSG00000105229	PIAS4	protein_coding	NA	E	ENST00000262971	9.72334	2.01421	42.1432	8.48264e-11	7.01312e-08
ENST00000359827	ENSG00000221866	7	132123341	132577301	-	PLXNA4-001	protein_coding	ENSG00000221866	PLXNA4	protein_coding	91584	E	ENST00000359827	-4.84715	1.49955	41.9866	9.18999e-11	7.42124e-08
MSTRG.26753.16	NA	3	39096668	39101589	-	not_in_ref	not_in_ref	not_in_ref	not_in_ref	not_in_ref	no_EG	j	ENST00000319283	-5.04239	2.48991	41.0649	1.47255e-10	1.16211e-07
MSTRG.39173.1	NA	9	79391776	79391992	+	not_in_ref	not_in_ref	not_in_ref	not_in_ref	not_in_ref	no_EG	p	ENST00000461726	12.0622	1.01413	40.885	1.61454e-10	1.24585e-07
ENST00000381278	ENSG00000128274	22	42692122	42695633	-	A4GALT-003	protein_coding	ENSG00000128274	A4GALT	protein_coding	NA	E	ENST00000381278	3.24464	2.81061	40.6122	1.85648e-10	1.4014e-07
ENST00000358303	ENSG00000091732	7	130018286	130051451	-	ZC3HC1-001	protein_coding	ENSG00000091732	ZC3HC1	protein_coding	51530	E	ENST00000358303	-4.51322	1.47472	40.5647	1.90211e-10	1.40529e-07
ENST00000596548	ENSG00000125730	19	6680159	6685038	-	C3-018	protein_coding	ENSG00000125730	C3	protein_coding	718	noCuffcomp	noCuffcomp	10.8436	1.9723	40.4165	2.052e-10	1.48445e-07
MSTRG.16539.7	NA	17	29566588	29573157	+	not_in_ref	not_in_ref	not_in_ref	not_in_ref	not_in_ref	no_EG	j	ENST00000301057	10.8034	1.48176	40.2679	2.2142e-10	1.5691e-07
ENST00000476228	ENSG00000114354	3	100709606	100748964	+	TFG-004	protein_coding	ENSG00000114354	TFG	protein_coding	10342	noCuffcomp	noCuffcomp	11.0511	3.6794	40.1423	2.36124e-10	1.63984e-07
ENST00000545668	ENSG00000013573	12	31073894	31104791	+	DDX11-003	protein_coding	ENSG00000013573	DDX11	protein_coding	1663	E	ENST00000545668	-8.6762	0.633542	39.9421	2.616e-10	1.78114e-07
MSTRG.26007.3	NA	22	38705742	38732239	+	not_in_ref	not_in_ref	not_in_ref	not_in_ref	not_in_ref	no_EG	j	ENST00000216044	12.9208	1.25565	39.9002	2.67282e-10	1.78483e-07
ENST00000395757	ENSG00000072310	17	17812073	17819951	-	SREBF1-004	protein_coding	ENSG00000072310	SREBF1	protein_coding	6720	E	ENST00000395757	2.13809	3.40684	39.6264	3.07492e-10	2.01459e-07
MSTRG.38147.2	NA	8	122781473	122974512	+	not_in_ref	not_in_ref	not_in_ref	not_in_ref	not_in_ref	no_EG	j	ENST00000314393	-6.14895	-0.0778668	39.4488	3.36781e-10	2.16562e-07
ENST00000342193	ENSG00000082438	2	164684765	164841412	-	COBLL1-004	protein_coding	ENSG00000082438	COBLL1	protein_coding	22837	E	ENST00000342193	10.2464	2.69672	39.3873	3.47542e-10	2.19419e-07
ENST00000241463	ENSG00000122035	13	27270327	27273690	+	RASL11A-001	protein_coding	ENSG00000122035	RASL11A	protein_coding	387496	E	ENST00000241463	10.2364	1.29118	39.2276	3.7717e-10	2.31396e-07
ENST00000506581	ENSG00000163682	4	39454139	39457682	-	RPL9-012	protein_coding	ENSG00000163682	RPL9	protein_coding	6133	E	ENST00000506581	8.71731	8.68621	39.2138	3.7984e-10	2.31396e-07
ENST00000369272	ENSG00000131781	1	147186261	147225309	-	FMO5-004	protein_coding	ENSG00000131781	FMO5	protein_coding	2330	E	ENST00000369272	10.2592	-1.02851	39.145	3.93462e-10	2.35562e-07
ENST00000421510	ENSG00000110047	11	64854612	64877917	-	EHD1-008	protein_coding	ENSG00000110047	EHD1	protein_coding	10938	E	ENST00000421510	-8.91673	3.69912	38.9825	4.27612e-10	2.51668e-07
ENST00000534557	ENSG00000149823	11	65096753	65108494	+	VPS51-004	protein_coding	ENSG00000149823	VPS51	protein_coding	738	E	ENST00000534557	8.89399	1.44621	38.6373	5.10355e-10	2.9536e-07
ENST00000355105	ENSG00000159592	1	45627306	45686630	-	GPBP1L1-201	protein_coding	ENSG00000159592	GPBP1L1	protein_coding	60313	E	ENST00000355105	-6.26966	1.6463	38.3901	5.79242e-10	3.28305e-07
MSTRG.19645.13	NA	19	18919797	18928335	+	not_in_ref	not_in_ref	not_in_ref	not_in_ref	not_in_ref	no_EG	j	ENST00000629999	-9.69858	1.60081	38.3669	5.86191e-10	3.28305e-07
ENST00000433129	ENSG00000064687	19	1041246	1065572	+	ABCA7-001	protein_coding	ENSG00000064687	ABCA7	protein_coding	10347	noCuffcomp	noCuffcomp	11.3881	1.5534	37.7821	7.91037e-10	4.35999e-07
MSTRG.39973.1	NA	9	133019486	133021148	+	not_in_ref	not_in_ref	not_in_ref	not_in_ref	not_in_ref	no_EG	o	ENST00000436459	8.9981	8.48527	37.7098	8.20904e-10	4.45392e-07
ENST00000301149	ENSG00000167588	12	50103819	50111319	+	GPD1-001	protein_coding	ENSG00000167588	GPD1	protein_coding	2819	noCuffcomp	noCuffcomp	8.23001	5.77521	37.1974	1.06753e-09	5.70293e-07
ENST00000596247	ENSG00000183207	19	48993898	49015929	+	RUVBL2-005	nonsense_mediated_decay	ENSG00000183207	RUVBL2	protein_coding	10856	E	ENST00000596247	6.06203	1.80403	37.0385	1.1582e-09	6.0603e-07
ENST00000453996	ENSG00000174177	16	88706463	88715386	+	CTU2-001	protein_coding	ENSG00000174177	CTU2	protein_coding	348180	E	ENST00000453996	11.0842	2.92546	37.0198	1.16934e-09	6.0603e-07
MSTRG.13841.11	NA	15	89664372	89678309	-	not_in_ref	not_in_ref	not_in_ref	not_in_ref	not_in_ref	no_EG	j	ENST00000300055	8.59558	4.11755	36.8863	1.25223e-09	6.39446e-07
MSTRG.27912.4	NA	3	130679010	130746695	-	not_in_ref	not_in_ref	not_in_ref	not_in_ref	not_in_ref	no_EG	j	ENST00000356763	-6.37106	1.77682	36.8516	1.27471e-09	6.41493e-07
ENST00000450127	ENSG00000115539	2	100568955	100572040	+	PDCL3-002	protein_coding	ENSG00000115539	PDCL3	protein_coding	NA	noCuffcomp	noCuffcomp	-9.90672	-0.731165	36.8043	1.30599e-09	6.46421e-07
ENST00000574547	ENSG00000132382	17	4539363	4544695	-	MYBBP1A-005	retained_intron	ENSG00000132382	MYBBP1A	protein_coding	10514	E	ENST00000574547	-11.8787	0.87736	36.781	1.32173e-09	6.46421e-07
ENST00000556572	ENSG00000087303	14	52005455	52038952	-	NID2-004	protein_coding	ENSG00000087303	NID2	protein_coding	22795	noCuffcomp	noCuffcomp	18.0292	-0.726658	36.7061	1.37347e-09	6.62392e-07
MSTRG.22262.2	NA	2	98599416	98608438	-	not_in_ref	not_in_ref	not_in_ref	not_in_ref	not_in_ref	no_EG	j	ENST00000328709	2.86335	-0.1203	36.4817	1.5411e-09	7.33057e-07
MSTRG.25465.3	NA	22	19179476	19226320	-	not_in_ref	not_in_ref	not_in_ref	not_in_ref	not_in_ref	no_EG	j	ENST00000427926	10.1248	-0.0175715	36.4423	1.5725e-09	7.37887e-07
MSTRG.22967.6	NA	2	165863027	165953843	-	not_in_ref	not_in_ref	not_in_ref	not_in_ref	not_in_ref	no_EG	j	ENST00000243344	-7.71701	1.97872	36.3246	1.67043e-09	7.73387e-07
ENST00000593812	ENSG00000127526	19	16549831	16552333	-	SLC35E1-009	processed_transcript	ENSG00000127526	SLC35E1	protein_coding	79939	noCuffcomp	noCuffcomp	10.0364	1.17892	36.2354	1.74866e-09	7.98955e-07
ENST00000357884	ENSG00000160392	19	40321416	40341885	-	C19orf47-003	nonsense_mediated_decay	ENSG00000160392	C19orf47	protein_coding	126526	E	ENST00000357884	-9.48912	-1.08359	36.0389	1.93414e-09	8.72223e-07
MSTRG.1417.7	NA	1	62455012	62633546	-	not_in_ref	not_in_ref	not_in_ref	not_in_ref	not_in_ref	no_EG	j	ENST00000251157	10.3305	2.23462	35.9902	1.98311e-09	8.82842e-07
ENST00000428334	ENSG00000157985	2	235709178	236131800	+	AGAP1-201	protein_coding	ENSG00000157985	AGAP1	protein_coding	116987	E	ENST00000428334	-5.54012	2.87755	35.6842	2.32041e-09	1.01992e-06
ENST00000458420	ENSG00000158258	3	139935185	140577397	+	CLSTN2-001	protein_coding	ENSG00000158258	CLSTN2	protein_coding	64084	E	ENST00000458420	-1.90799	3.07689	35.6467	2.36549e-09	1.02674e-06
MSTRG.18929.3	NA	19	1206464	1228095	+	not_in_ref	not_in_ref	not_in_ref	not_in_ref	not_in_ref	no_EG	j	ENST00000586243	9.92868	2.83619	35.5632	2.46909e-09	1.05848e-06
MSTRG.28899.14	NA	4	2809788	2840725	+	not_in_ref	not_in_ref	not_in_ref	not_in_ref	not_in_ref	no_EG	j	ENST00000515737	-7.28387	2.91048	35.4126	2.66753e-09	1.1296e-06
ENST00000409836	ENSG00000136732	2	126656184	126696664	+	GYPC-002	protein_coding	ENSG00000136732	GYPC	protein_coding	2995	E	ENST00000409836	6.51575	2.61064	35.3306	2.78223e-09	1.16398e-06
MSTRG.22223.3	NA	2	96184867	96208693	-	not_in_ref	not_in_ref	not_in_ref	not_in_ref	not_in_ref	no_EG	j	ENST00000337288	-9.47633	0.487197	35.217	2.94941e-09	1.21923e-06
ENST00000367483	ENSG00000116690	1	186296279	186314562	+	PRG4-002	protein_coding	ENSG00000116690	PRG4	protein_coding	10216	E	ENST00000367483	8.29621	1.63672	35.1509	3.05125e-09	1.24649e-06
MSTRG.18062.3	NA	17	82078602	82098263	-	not_in_ref	not_in_ref	not_in_ref	not_in_ref	not_in_ref	no_EG	j	ENST00000306749	-6.80648	9.06215	34.9246	3.42731e-09	1.38384e-06
MSTRG.12256.9	NA	14	102081049	102086331	-	not_in_ref	not_in_ref	not_in_ref	not_in_ref	not_in_ref	no_EG	j	ENST00000334701	10.1853	7.58933	34.8014	3.65104e-09	1.45723e-06
MSTRG.297.9	NA	1	10399516	10420509	+	not_in_ref	not_in_ref	not_in_ref	not_in_ref	not_in_ref	no_EG	j	ENST00000270776	15.7109	1.23863	34.7673	3.71562e-09	1.4641e-06
ENST00000494852	ENSG00000134871	13	110469217	110473594	+	COL4A2-002	processed_transcript	ENSG00000134871	COL4A2	protein_coding	1284	noCuffcomp	noCuffcomp	9.77796	-0.539058	34.748	3.75258e-09	1.4641e-06
MSTRG.35301.24	NA	7	44044761	44060939	+	not_in_ref	not_in_ref	not_in_ref	not_in_ref	not_in_ref	no_EG	j	ENST00000494774	10.1937	1.536	34.692	3.86215e-09	1.49011e-06
MSTRG.27075.21	NA	3	51983535	51989146	+	not_in_ref	not_in_ref	not_in_ref	not_in_ref	not_in_ref	no_EG	j	ENST00000463721	-7.27074	1.42322	34.6481	3.95028e-09	1.50736e-06
ENST00000488546	ENSG00000087460	20	58888779	58910401	+	GNAS-003	processed_transcript	ENSG00000087460	GNAS	protein_coding	2778	E	ENST00000488546	-1.70416	3.69059	34.5133	4.23348e-09	1.59786e-06
ENST00000352480	ENSG00000130707	9	130444929	130501274	+	ASS1-002	protein_coding	ENSG00000130707	ASS1	protein_coding	445	E	ENST00000352480	9.27998	3.93815	34.3074	4.70589e-09	1.75707e-06
MSTRG.34981.4	NA	7	22118947	22136072	-	not_in_ref	not_in_ref	not_in_ref	not_in_ref	not_in_ref	no_EG	j	ENST00000344041	10.953	1.18555	34.1903	4.9977e-09	1.84617e-06
ENST00000598681	ENSG00000105373	19	47745565	47756744	+	GLTSCR2-004	processed_transcript	ENSG00000105373	GLTSCR2	protein_coding	29997	E	ENST00000598681	-7.39742	4.56537	34.0955	5.24721e-09	1.91794e-06
ENST00000456182	ENSG00000146963	7	139359912	139423151	+	C7orf55-LUC7L2-003	nonsense_mediated_decay	ENSG00000146963	C7orf55-LUC7L2	protein_coding	51631	noCuffcomp	noCuffcomp	-7.63219	1.85348	34.01	5.48295e-09	1.98323e-06
ENST00000420541	ENSG00000121858	3	172505662	172523475	-	TNFSF10-002	protein_coding	ENSG00000121858	TNFSF10	protein_coding	8743	E	ENST00000420541	-7.61033	1.60472	33.8424	5.97609e-09	2.13932e-06
ENST00000401000	ENSG00000163125	1	150364650	150476566	+	RPRD2-001	protein_coding	ENSG00000163125	RPRD2	protein_coding	23248	E	ENST00000401000	11.643	1.5936	33.8138	6.06464e-09	2.14886e-06
MSTRG.35306.29	NA	7	43984492	44019094	-	not_in_ref	not_in_ref	not_in_ref	not_in_ref	not_in_ref	no_EG	j	ENST00000427076	14.2759	-0.344214	33.6055	6.75029e-09	2.36765e-06
ENST00000511115	ENSG00000189184	4	137520838	137532476	-	PCDH18-006	protein_coding	ENSG00000189184	PCDH18	protein_coding	54510	E	ENST00000511115	-12.4817	2.2098	33.462	7.26684e-09	2.52334e-06
ENST00000538492	ENSG00000197562	16	590077	629271	+	RAB40C-202	protein_coding	ENSG00000197562	RAB40C	protein_coding	57799	E	ENST00000538492	10.6133	0.168769	33.4226	7.41584e-09	2.54958e-06
MSTRG.11697.17	NA	14	67676792	67693022	-	not_in_ref	not_in_ref	not_in_ref	not_in_ref	not_in_ref	no_EG	j	ENST00000381346	8.7914	1.62777	33.3153	7.8362e-09	2.66769e-06
MSTRG.26194.21	NA	22	46203625	46243755	+	not_in_ref	not_in_ref	not_in_ref	not_in_ref	not_in_ref	no_EG	j	ENST00000407236	-10.3762	3.18857	33.2946	7.92042e-09	2.67018e-06
MSTRG.40233.2	NA	MT	748	1601	+	not_in_ref	not_in_ref	not_in_ref	not_in_ref	not_in_ref	no_EG	o	ENST00000389680	-5.55922	8.55915	33.0225	9.10991e-09	3.01986e-06
ENST00000341744	ENSG00000124225	20	57648392	57709902	-	PMEPA1-001	protein_coding	ENSG00000124225	PMEPA1	protein_coding	56937	E	ENST00000341744	8.09648	2.78586	33.0179	9.13157e-09	3.01986e-06
MSTRG.14099.7	NA	16	680530	682717	+	not_in_ref	not_in_ref	not_in_ref	not_in_ref	not_in_ref	no_EG	j	ENST00000565677	9.66034	3.47444	32.9738	9.34095e-09	3.05995e-06
MSTRG.15016.5	NA	16	50066067	50106385	+	not_in_ref	not_in_ref	not_in_ref	not_in_ref	not_in_ref	no_EG	j	ENST00000299192	-8.52742	0.99809	32.9502	9.45485e-09	3.06832e-06
ENST00000439924	ENSG00000182149	16	71915626	71929002	+	IST1-011	nonsense_mediated_decay	ENSG00000182149	IST1	protein_coding	9798	E	ENST00000439924	9.81604	2.84353	32.8077	1.01741e-08	3.27116e-06
MSTRG.23800.8	NA	2	231454750	231458357	-	not_in_ref	not_in_ref	not_in_ref	not_in_ref	not_in_ref	no_EG	j	ENST00000322723	-6.5213	-0.246309	32.5091	1.18638e-08	3.75674e-06
ENST00000423565	ENSG00000105875	7	135183839	135210899	-	WDR91-002	protein_coding	ENSG00000105875	WDR91	protein_coding	29062	E	ENST00000423565	-8.13265	0.693933	32.5005	1.19159e-08	3.75674e-06
ENST00000378748	ENSG00000123240	10	13100173	13138291	+	OPTN-005	protein_coding	ENSG00000123240	OPTN	protein_coding	10133	E	ENST00000378748	-7.24386	2.28319	32.484	1.20178e-08	3.75674e-06
ENST00000379070	ENSG00000101290	20	5176102	5191354	+	CDS2-007	processed_transcript	ENSG00000101290	CDS2	protein_coding	8760	E	ENST00000379070	7.68122	1.70049	32.468	1.21171e-08	3.75674e-06
MSTRG.25770.46	NA	22	29280800	29300336	+	not_in_ref	not_in_ref	not_in_ref	not_in_ref	not_in_ref	no_EG	j	ENST00000414183	10.2943	3.54029	32.443	1.22738e-08	3.77164e-06
ENST00000309733	ENSG00000174749	4	112145397	112195256	+	C4orf32-001	protein_coding	ENSG00000174749	C4orf32	protein_coding	NA	E	ENST00000309733	7.70325	3.36508	32.4247	1.23901e-08	3.77399e-06
MSTRG.6575.12	NA	11	61873527	61891381	-	not_in_ref	not_in_ref	not_in_ref	not_in_ref	not_in_ref	no_EG	j	ENST00000278829	6.42989	3.85367	32.3986	1.25575e-08	3.79172e-06
ENST00000511573	ENSG00000138640	4	88727069	88759469	-	FAM13A-003	retained_intron	ENSG00000138640	FAM13A	protein_coding	10144	E	ENST00000511573	-5.16193	1.80472	32.3685	1.27539e-08	3.81781e-06
ENST00000619546	ENSG00000278540	17	37084998	37205812	-	ACACA-012	protein_coding	ENSG00000278540	ACACA	protein_coding	31	noCuffcomp	noCuffcomp	-6.27772	2.58516	32.2756	1.33786e-08	3.96658e-06
MSTRG.2791.27	NA	1	160217347	160262407	-	not_in_ref	not_in_ref	not_in_ref	not_in_ref	not_in_ref	no_EG	j	ENST00000556710	-2.00176	1.18417	32.261	1.34793e-08	3.96658e-06
ENST00000334668	ENSG00000204642	6	29723340	29726525	+	HLA-F-202	protein_coding	ENSG00000204642	HLA-F	protein_coding	3134	noCuffcomp	noCuffcomp	8.14167	2.96711	32.1567	1.42223e-08	4.15004e-06
ENST00000594001	ENSG00000105402	19	47487680	47515058	-	NAPA-002	nonsense_mediated_decay	ENSG00000105402	NAPA	protein_coding	8775	E	ENST00000594001	9.4024	0.110023	32.0932	1.46954e-08	4.24075e-06
ENST00000223215	ENSG00000106484	7	130492093	130506292	+	MEST-001	protein_coding	ENSG00000106484	MEST	protein_coding	4232	E	ENST00000223215	9.02754	3.29925	32.0823	1.47774e-08	4.24075e-06
ENST00000471538	ENSG00000065526	1	15873502	15876711	+	SPEN-003	processed_transcript	ENSG00000065526	SPEN	protein_coding	23013	E	ENST00000471538	10.666	-0.866568	32.0557	1.49813e-08	4.26401e-06
MSTRG.29413.1	NA	4	56999216	57110385	-	not_in_ref	not_in_ref	not_in_ref	not_in_ref	not_in_ref	no_EG	j	ENST00000295666	10.8934	3.82841	31.9709	1.56496e-08	4.41803e-06
MSTRG.23206.4	NA	2	188974419	189012048	+	not_in_ref	not_in_ref	not_in_ref	not_in_ref	not_in_ref	no_EG	j	ENST00000304636	-7.66026	7.14264	31.9383	1.59145e-08	4.45657e-06
ENST00000376568	ENSG00000204580	6	30884458	30900153	+	DDR1-002	protein_coding	ENSG00000204580	DDR1	protein_coding	780	E	ENST00000376568	7.57561	2.38489	31.864	1.65356e-08	4.59344e-06
MSTRG.32157.3	NA	5	150053293	150086554	-	not_in_ref	not_in_ref	not_in_ref	not_in_ref	not_in_ref	no_EG	j	ENST00000286301	-7.87764	0.951744	31.8128	1.69768e-08	4.67858e-06
ENST00000498917	ENSG00000248049	4	67701280	67722505	+	UBA6-AS1-003	antisense	ENSG00000248049	UBA6-AS1	antisense	550112	E	ENST00000498917	9.40711	0.274163	31.5645	1.9292e-08	5.27477e-06
MSTRG.26282.10	NA	22	50446826	50474942	-	not_in_ref	not_in_ref	not_in_ref	not_in_ref	not_in_ref	no_EG	j	ENST00000380817	2.56054	3.55079	31.5044	1.98991e-08	5.39826e-06
ENST00000481332	ENSG00000174953	3	154284781	154292578	-	DHX36-012	retained_intron	ENSG00000174953	DHX36	protein_coding	170506	noCuffcomp	noCuffcomp	-6.43231	-0.338674	31.3925	2.10794e-08	5.67412e-06
MSTRG.39285.11	NA	9	92210360	92242689	-	not_in_ref	not_in_ref	not_in_ref	not_in_ref	not_in_ref	no_EG	j	ENST00000627121	9.25659	1.9327	30.9436	2.65642e-08	7.07868e-06
ENST00000340692	ENSG00000124615	6	39905525	39934421	-	MOCS1-005	protein_coding	ENSG00000124615	MOCS1	protein_coding	4337	E	ENST00000340692	-3.40819	3.33084	30.9333	2.67051e-08	7.07868e-06
ENST00000376817	ENSG00000204628	5	181236937	181243903	-	GNB2L1-035	protein_coding	ENSG00000204628	GNB2L1	protein_coding	10399	E	ENST00000376817	8.70452	4.21353	30.9034	2.71192e-08	7.13398e-06
ENST00000370177	ENSG00000125534	20	63520775	63521938	+	PPDPF-004	protein_coding	ENSG00000125534	PPDPF	protein_coding	79144	E	ENST00000370177	7.5062	3.58633	30.8293	2.8175e-08	7.31595e-06
ENST00000485290	ENSG00000134452	10	5923571	5927518	+	FBXO18-007	processed_transcript	ENSG00000134452	FBXO18	protein_coding	84893	E	ENST00000485290	9.25086	0.286756	30.8254	2.82323e-08	7.31595e-06
MSTRG.6415.1	NA	11	47164265	47176859	-	not_in_ref	not_in_ref	not_in_ref	not_in_ref	not_in_ref	no_EG	j	ENST00000524782	8.1034	2.31807	30.7883	2.87762e-08	7.40166e-06
MSTRG.35661.6	NA	7	75996363	76047901	-	not_in_ref	not_in_ref	not_in_ref	not_in_ref	not_in_ref	no_EG	j	ENST00000451157	-7.57751	0.156362	30.7477	2.93859e-08	7.50291e-06
MSTRG.11856.14	NA	14	73852072	73932247	+	not_in_ref	not_in_ref	not_in_ref	not_in_ref	not_in_ref	no_EG	j	ENST00000556551	-6.81971	1.57601	30.6732	3.05347e-08	7.73931e-06
ENST00000457823	ENSG00000163104	4	94207845	94290821	+	SMARCAD1-001	protein_coding	ENSG00000163104	SMARCAD1	protein_coding	56916	E	ENST00000457823	-6.80196	1.33972	30.6133	3.14932e-08	7.92441e-06
MSTRG.40790.6	NA	X	54932916	54998748	-	not_in_ref	not_in_ref	not_in_ref	not_in_ref	not_in_ref	no_EG	j	ENST00000375006	7.57199	-0.776599	30.4732	3.38506e-08	8.45632e-06
ENST00000293826	ENSG00000248871	17	7549099	7561601	+	TNFSF12-TNFSF13-001	protein_coding	ENSG00000248871	TNFSF12-TNFSF13	protein_coding	407977	E	ENST00000293826	9.47955	1.55934	30.3086	3.68486e-08	9.1395e-06
MSTRG.18075.12	NA	17	82392454	82415516	-	not_in_ref	not_in_ref	not_in_ref	not_in_ref	not_in_ref	no_EG	j	ENST00000329197	-5.18317	0.157289	30.2402	3.81714e-08	9.40044e-06
ENST00000261534	ENSG00000009830	14	77274956	77320884	-	POMT2-001	protein_coding	ENSG00000009830	POMT2	protein_coding	29954	E	ENST00000261534	-2.14453	1.07856	30.0035	4.31256e-08	1.05457e-05
MSTRG.30003.8	NA	4	122876153	122898221	+	not_in_ref	not_in_ref	not_in_ref	not_in_ref	not_in_ref	no_EG	j	ENST00000264498	6.57855	6.29478	29.9264	4.48762e-08	1.08971e-05
MSTRG.1579.4	NA	1	78620422	78646145	+	not_in_ref	not_in_ref	not_in_ref	not_in_ref	not_in_ref	no_EG	j	ENST00000370751	9.41901	2.45884	29.8424	4.68638e-08	1.13007e-05
ENST00000265080	ENSG00000113319	5	80960672	81230156	+	RASGRF2-001	protein_coding	ENSG00000113319	RASGRF2	protein_coding	5924	E	ENST00000265080	9.99169	2.52798	29.7498	4.91566e-08	1.17718e-05
MSTRG.29483.5	NA	4	74036589	74046075	-	not_in_ref	not_in_ref	not_in_ref	not_in_ref	not_in_ref	no_EG	j	ENST00000296026	7.75472	4.46405	29.7031	5.03534e-08	1.19758e-05
ENST00000420584	ENSG00000064995	6	34877778	34888071	-	TAF11-201	protein_coding	ENSG00000064995	TAF11	protein_coding	6882	E	ENST00000420584	9.74999	0.864942	29.6897	5.0704e-08	1.19772e-05
MSTRG.17017.37	NA	17	42862980	42874369	+	not_in_ref	not_in_ref	not_in_ref	not_in_ref	not_in_ref	no_EG	j	ENST00000566825	-7.11157	-1.48813	29.5542	5.43735e-08	1.27572e-05
MSTRG.36685.27	NA	7	150368908	150374039	+	not_in_ref	not_in_ref	not_in_ref	not_in_ref	not_in_ref	no_EG	j	ENST00000397281	-6.48073	2.92552	29.4258	5.81e-08	1.354e-05
ENST00000396009	ENSG00000101096	20	51386957	51542719	-	NFATC2-002	protein_coding	ENSG00000101096	NFATC2	protein_coding	4773	E	ENST00000396009	9.43057	1.68749	29.3757	5.96208e-08	1.38018e-05
MSTRG.40629.21	NA	X	47218785	47229783	+	not_in_ref	not_in_ref	not_in_ref	not_in_ref	not_in_ref	no_EG	j	ENST00000622098	9.3055	1.93802	29.3189	6.13944e-08	1.41183e-05
ENST00000545796	ENSG00000131196	18	79400274	79529323	+	NFATC1-201	protein_coding	ENSG00000131196	NFATC1	protein_coding	4772	E	ENST00000545796	10.0623	0.483491	29.2454	6.37687e-08	1.45678e-05
MSTRG.38787.13	NA	9	33384950	33402466	-	not_in_ref	not_in_ref	not_in_ref	not_in_ref	not_in_ref	no_EG	j	ENST00000297988	8.05741	3.62494	29.1431	6.72232e-08	1.52566e-05
ENST00000253457	ENSG00000131148	16	85778624	85799540	-	EMC8-001	protein_coding	ENSG00000131148	EMC8	protein_coding	10328	E	ENST00000253457	9.41894	1.10634	29.0915	6.90391e-08	1.5567e-05
ENST00000265149	ENSG00000168769	4	105146786	105279803	+	TET2-005	nonsense_mediated_decay	ENSG00000168769	TET2	protein_coding	54790	E	ENST00000265149	9.05169	2.02557	29.0039	7.22313e-08	1.61817e-05
ENST00000495946	ENSG00000137404	6	30688047	30690353	-	NRM-008	processed_transcript	ENSG00000137404	NRM	protein_coding	11270	E	ENST00000495946	-7.13932	-0.960988	28.9274	7.51411e-08	1.67256e-05
ENST00000523562	ENSG00000102878	16	67164790	67169945	+	HSF4-010	nonsense_mediated_decay	ENSG00000102878	HSF4	protein_coding	3299	E	ENST00000523562	9.32627	-0.0598187	28.8172	7.95428e-08	1.75926e-05
ENST00000597296	ENSG00000186230	19	57435347	57438457	+	ZNF749-003	processed_transcript	ENSG00000186230	ZNF749	protein_coding	388567	E	ENST00000597296	10.3016	0.50151	28.7232	8.34972e-08	1.83504e-05
ENST00000520687	ENSG00000113140	5	151662488	151667654	-	SPARC-002	retained_intron	ENSG00000113140	SPARC	protein_coding	6678	E	ENST00000520687	8.97615	8.32848	28.6549	8.64959e-08	1.88339e-05
MSTRG.14114.3	NA	16	1363205	1399508	-	not_in_ref	not_in_ref	not_in_ref	not_in_ref	not_in_ref	no_EG	j	ENST00000389221	10.3108	1.52943	28.6485	8.67824e-08	1.88339e-05
ENST00000443462	ENSG00000138674	4	82818662	82891178	-	SEC31A-007	protein_coding	ENSG00000138674	SEC31A	protein_coding	22872	E	ENST00000443462	6.81817	2.85763	28.6243	8.78738e-08	1.89524e-05
ENST00000579852	ENSG00000108342	17	40015446	40017758	+	CSF3-007	nonsense_mediated_decay	ENSG00000108342	CSF3	protein_coding	1440	E	ENST00000579852	8.9364	6.18409	28.6059	8.87095e-08	1.90145e-05
ENST00000336909	ENSG00000134352	5	55935099	55976314	-	IL6ST-201	protein_coding	ENSG00000134352	IL6ST	protein_coding	3572	E	ENST00000336909	-6.48937	9.1089	28.5801	8.99034e-08	1.91522e-05
ENST00000610139	ENSG00000132716	1	160239222	160262425	-	DCAF8-018	protein_coding	ENSG00000132716	DCAF8	protein_coding	50717	E	ENST00000610139	-11.6227	0.202791	28.4997	9.37117e-08	1.97273e-05
ENST00000354124	ENSG00000173918	17	79022934	79049787	+	C1QTNF1-201	protein_coding	ENSG00000173918	C1QTNF1	protein_coding	114897	E	ENST00000354124	10.1329	4.4279	28.4992	9.37391e-08	1.97273e-05
ENST00000509137	ENSG00000161243	19	39024025	39032525	-	FBXO27-201	protein_coding	ENSG00000161243	FBXO27	protein_coding	126433	E	ENST00000509137	8.71472	1.06866	28.4373	9.67801e-08	2.02445e-05
ENST00000554259	ENSG00000174373	14	35538357	35651876	-	RALGAPA1-019	protein_coding	ENSG00000174373	RALGAPA1	protein_coding	253959	E	ENST00000554259	8.21478	1.95679	28.417	9.78041e-08	2.03362e-05
ENST00000288976	ENSG00000158079	9	94084464	94109854	+	PTPDC1-002	protein_coding	ENSG00000158079	PTPDC1	protein_coding	138639	E	ENST00000288976	-7.51799	0.346249	28.3831	9.95321e-08	2.05723e-05
ENST00000435345	ENSG00000116171	1	53014968	53051113	+	SCP2-015	protein_coding	ENSG00000116171	SCP2	protein_coding	6342	noCuffcomp	noCuffcomp	-2.78526	3.98171	28.1772	1.10699e-07	2.27449e-05
ENST00000310496	ENSG00000169733	17	82047902	82051774	-	RFNG-001	protein_coding	ENSG00000169733	RFNG	protein_coding	5986	E	ENST00000310496	8.02459	1.39122	28.0351	1.19132e-07	2.42963e-05
MSTRG.18906.18	NA	19	1009653	1020851	-	not_in_ref	not_in_ref	not_in_ref	not_in_ref	not_in_ref	no_EG	j	ENST00000356663	10.5339	1.78878	28.0268	1.19649e-07	2.42963e-05
ENST00000374907	ENSG00000138448	2	186590080	186680897	+	ITGAV-003	protein_coding	ENSG00000138448	ITGAV	protein_coding	3685	E	ENST00000374907	10.5517	5.11026	27.9487	1.24576e-07	2.51498e-05
ENST00000253115	ENSG00000130818	19	9523224	9538627	-	ZNF426-001	protein_coding	ENSG00000130818	ZNF426	protein_coding	79088	E	ENST00000253115	9.9082	1.46316	27.9044	1.27459e-07	2.55832e-05
ENST00000287936	ENSG00000113161	5	75337168	75362104	+	HMGCR-001	protein_coding	ENSG00000113161	HMGCR	protein_coding	3156	E	ENST00000287936	11.3968	0.917206	27.8562	1.30676e-07	2.60093e-05
ENST00000506882	ENSG00000145241	4	67472482	67545483	-	CENPC-003	nonsense_mediated_decay	ENSG00000145241	CENPC	protein_coding	1060	E	ENST00000506882	-6.41727	1.14656	27.8502	1.3108e-07	2.60093e-05
MSTRG.16539.11	NA	17	29568027	29573157	+	not_in_ref	not_in_ref	not_in_ref	not_in_ref	not_in_ref	no_EG	j	ENST00000301057	8.24727	3.18798	27.8272	1.3265e-07	2.61712e-05
MSTRG.36424.8	NA	7	130524060	130531048	+	not_in_ref	not_in_ref	not_in_ref	not_in_ref	not_in_ref	no_EG	i	ENST00000425248	-5.05229	2.95664	27.7826	1.35743e-07	2.66301e-05
ENST00000262850	ENSG00000083750	X	55717885	55758348	+	RRAGB-001	protein_coding	ENSG00000083750	RRAGB	protein_coding	10325	E	ENST00000262850	-6.4359	-0.932808	27.6966	1.41913e-07	2.76841e-05
MSTRG.26791.1	NA	3	41225538	41962430	-	not_in_ref	not_in_ref	not_in_ref	not_in_ref	not_in_ref	no_EG	j	ENST00000301831	-8.43428	-0.799229	27.6561	1.44918e-07	2.81125e-05
ENST00000456735	ENSG00000196712	17	31200536	31374433	+	NF1-003	protein_coding	ENSG00000196712	NF1	protein_coding	4763	E	ENST00000456735	-3.15763	2.17409	27.6365	1.46391e-07	2.82404e-05
ENST00000378533	ENSG00000101955	X	38149339	38220899	-	SRPX-003	protein_coding	ENSG00000101955	SRPX	protein_coding	8406	E	ENST00000378533	9.81384	4.18719	27.6071	1.48632e-07	2.85143e-05
ENST00000511044	ENSG00000156453	5	141862885	141866202	-	PCDH1-004	processed_transcript	ENSG00000156453	PCDH1	protein_coding	5097	E	ENST00000511044	9.03327	0.431332	27.5884	1.50073e-07	2.86327e-05
MSTRG.37545.1	NA	8	63015079	63038801	-	not_in_ref	not_in_ref	not_in_ref	not_in_ref	not_in_ref	no_EG	j	ENST00000260118	7.40387	1.26915	27.4871	1.58142e-07	3.00072e-05
MSTRG.25706.26	NA	22	25666634	25724624	+	not_in_ref	not_in_ref	not_in_ref	not_in_ref	not_in_ref	no_EG	j	ENST00000619906	-5.03748	1.70785	27.4245	1.63348e-07	3.07274e-05
MSTRG.13218.4	NA	15	56630228	56724870	-	not_in_ref	not_in_ref	not_in_ref	not_in_ref	not_in_ref	no_EG	j	ENST00000559000	10.3538	1.64406	27.4203	1.63707e-07	3.07274e-05
ENST00000397386	ENSG00000071282	3	8501807	8568125	+	LMCD1-201	protein_coding	ENSG00000071282	LMCD1	protein_coding	29995	E	ENST00000397386	11.4922	2.80045	27.396	1.65777e-07	3.09487e-05
ENST00000396664	ENSG00000122644	7	12686908	12689176	+	ARL4A-004	protein_coding	ENSG00000122644	ARL4A	protein_coding	10124	E	ENST00000396664	13.9097	1.66002	27.3837	1.66835e-07	3.09796e-05
ENST00000506060	ENSG00000168255	7	102541104	102572521	-	POLR2J3-014	processed_transcript	ENSG00000168255	POLR2J3	protein_coding	548644	noCuffcomp	noCuffcomp	-5.86701	0.486863	27.1402	1.89223e-07	3.46651e-05
ENST00000397260	ENSG00000092096	14	23346314	23352860	-	SLC22A17-005	protein_coding	ENSG00000092096	SLC22A17	protein_coding	51310	E	ENST00000397260	9.9334	0.721705	27.1357	1.89662e-07	3.46651e-05
ENST00000513873	ENSG00000080822	3	98515484	98517160	-	CLDND1-031	protein_coding	ENSG00000080822	CLDND1	protein_coding	56650	E	ENST00000513873	8.80502	0.519427	27.1355	1.89678e-07	3.46651e-05
ENST00000397370	ENSG00000131051	20	35734876	35742232	-	RBM39-013	protein_coding	ENSG00000131051	RBM39	protein_coding	9584	E	ENST00000397370	-9.15967	-0.546845	26.9507	2.08707e-07	3.79432e-05
ENST00000593795	ENSG00000064607	19	18990888	19001674	-	SUGP2-013	nonsense_mediated_decay	ENSG00000064607	SUGP2	protein_coding	10147	E	ENST00000593795	9.39408	-0.888339	26.8755	2.16996e-07	3.92446e-05
ENST00000392249	ENSG00000082146	2	201451796	201480846	+	STRADB-003	protein_coding	ENSG00000082146	STRADB	protein_coding	55437	E	ENST00000392249	10.1697	1.50772	26.7981	2.25854e-07	4.04363e-05
ENST00000221222	ENSG00000051128	19	18929203	18939049	-	HOMER3-002	protein_coding	ENSG00000051128	HOMER3	protein_coding	9454	noCuffcomp	noCuffcomp	9.92447	2.01195	26.7976	2.25914e-07	4.04363e-05
ENST00000595669	ENSG00000161677	19	50506002	50511220	-	JOSD2-002	protein_coding	ENSG00000161677	JOSD2	protein_coding	126119	E	ENST00000595669	8.92105	-0.465319	26.7055	2.36944e-07	4.2193e-05
ENST00000432329	ENSG00000118260	2	207529892	207603431	+	CREB1-001	protein_coding	ENSG00000118260	CREB1	protein_coding	NA	E	ENST00000432329	5.73476	2.77506	26.6626	2.42266e-07	4.29206e-05
ENST00000382870	ENSG00000121741	13	20026519	20086747	+	ZMYM2-001	retained_intron	ENSG00000121741	ZMYM2	protein_coding	7750	E	ENST00000382870	9.37677	1.83005	26.5844	2.52268e-07	4.44657e-05
ENST00000599668	ENSG00000125730	19	6677867	6680151	-	C3-013	processed_transcript	ENSG00000125730	C3	protein_coding	718	E	ENST00000599668	6.87138	3.23175	26.5673	2.5451e-07	4.46344e-05
ENST00000215770	ENSG00000099974	22	23966901	23972532	+	DDTL-001	protein_coding	ENSG00000099974	DDTL	protein_coding	100037417	E	ENST00000215770	8.64545	-0.40818	26.5281	2.59732e-07	4.53213e-05
ENST00000425063	ENSG00000197343	7	99558713	99576439	+	ZNF655-012	protein_coding	ENSG00000197343	ZNF655	protein_coding	79027	E	ENST00000425063	0.463498	2.27829	26.3952	2.78237e-07	4.83075e-05
MSTRG.24182.1	NA	20	17569863	17608230	+	not_in_ref	not_in_ref	not_in_ref	not_in_ref	not_in_ref	no_EG	j	ENST00000474024	7.65922	1.61839	26.3354	2.86973e-07	4.95764e-05
ENST00000373344	ENSG00000085224	X	77504878	77786269	-	ATRX-001	protein_coding	ENSG00000085224	ATRX	protein_coding	546	E	ENST00000373344	-6.26057	1.18612	26.2805	2.95252e-07	5.07408e-05
MSTRG.36424.3	NA	7	130508477	130535620	+	not_in_ref	not_in_ref	not_in_ref	not_in_ref	not_in_ref	no_EG	x	ENST00000425248	-4.61518	4.63501	26.2715	2.96636e-07	5.07408e-05
ENST00000546267	ENSG00000233024	16	18361225	18379331	-	RP11-1212A22.4-007	processed_transcript	ENSG00000233024	RP11-1212A22.4	protein_coding	NA	noCuffcomp	noCuffcomp	-7.55732	3.13014	26.2409	3.01365e-07	5.1297e-05
ENST00000356644	ENSG00000080546	6	108986442	109009555	-	SESN1-002	protein_coding	ENSG00000080546	SESN1	protein_coding	27244	E	ENST00000356644	9.44368	1.73595	26.2266	3.0361e-07	5.14271e-05
ENST00000268314	ENSG00000140691	16	31458996	31467164	+	ARMC5-201	protein_coding	ENSG00000140691	ARMC5	protein_coding	79798	E	ENST00000268314	8.30122	0.906627	26.1925	3.09017e-07	5.20889e-05
ENST00000513665	ENSG00000157510	5	149315640	149341802	+	AFAP1L1-004	retained_intron	ENSG00000157510	AFAP1L1	protein_coding	134265	E	ENST00000513665	9.37648	2.30295	26.1653	3.13397e-07	5.2572e-05
ENST00000555365	ENSG00000100445	14	24439902	24442765	-	SDR39U1-018	protein_coding	ENSG00000100445	SDR39U1	protein_coding	56948	E	ENST00000555365	2.38065	0.76681	25.9751	3.45853e-07	5.77375e-05
ENST00000523338	ENSG00000145901	5	151029949	151087158	-	TNIP1-003	protein_coding	ENSG00000145901	TNIP1	protein_coding	10318	E	ENST00000523338	7.8698	5.13797	25.9522	3.49972e-07	5.81236e-05
ENST00000563934	ENSG00000188215	16	20858996	20868980	-	DCUN1D3-002	protein_coding	ENSG00000188215	DCUN1D3	protein_coding	NA	E	ENST00000563934	-6.28975	2.42739	25.9437	3.51514e-07	5.81236e-05
ENST00000361055	ENSG00000144744	3	69054730	69080408	-	UBA3-001	protein_coding	ENSG00000144744	UBA3	protein_coding	9039	E	ENST00000361055	-6.59744	1.33415	25.9159	3.56619e-07	5.86883e-05
MSTRG.28245.1	NA	3	156469323	156555149	-	not_in_ref	not_in_ref	not_in_ref	not_in_ref	not_in_ref	no_EG	j	ENST00000265044	-6.29461	3.45144	25.8789	3.63518e-07	5.95415e-05
MSTRG.18466.2	NA	18	31621885	31684689	-	not_in_ref	not_in_ref	not_in_ref	not_in_ref	not_in_ref	no_EG	j	ENST00000306851	-6.83549	2.63993	25.8402	3.70887e-07	6.04633e-05
ENST00000487179	ENSG00000244693	7	144266701	144269288	-	CTAGE8-001	protein_coding	ENSG00000244693	CTAGE8	protein_coding	100142659	E	ENST00000487179	8.44931	-1.13861	25.629	4.13783e-07	6.71412e-05
MSTRG.2480.13	NA	1	151364345	151367023	-	not_in_ref	not_in_ref	not_in_ref	not_in_ref	not_in_ref	no_EG	j	ENST00000426705	8.87755	3.95676	25.5899	4.22254e-07	6.8197e-05
MSTRG.7298.2	NA	11	86441013	86672372	-	not_in_ref	not_in_ref	not_in_ref	not_in_ref	not_in_ref	no_EG	j	ENST00000543262	11.0648	-1.89929	25.5626	4.28251e-07	6.88453e-05
ENST00000331925	ENSG00000184009	17	81509971	81512874	-	ACTG1-001	protein_coding	ENSG00000184009	ACTG1	protein_coding	71	E	ENST00000331925	6.63614	4.76162	25.5294	4.35687e-07	6.97179e-05
MSTRG.33453.20	NA	6	39905525	39934390	-	not_in_ref	not_in_ref	not_in_ref	not_in_ref	not_in_ref	no_EG	j	ENST00000373188	7.8438	3.77338	25.5044	4.41372e-07	7.03037e-05
MSTRG.24337.6	NA	20	31664454	31723954	-	not_in_ref	not_in_ref	not_in_ref	not_in_ref	not_in_ref	no_EG	j	ENST00000307677	-4.15766	-0.0159297	25.4628	4.50987e-07	7.15005e-05
MSTRG.21060.5	NA	2	8728894	8836714	-	not_in_ref	not_in_ref	not_in_ref	not_in_ref	not_in_ref	no_EG	j	ENST00000256707	-8.32544	3.22788	25.4542	4.53004e-07	7.15005e-05
MSTRG.16277.3	NA	17	18183458	18185815	+	not_in_ref	not_in_ref	not_in_ref	not_in_ref	not_in_ref	no_EG	j	ENST00000399138	7.08034	1.33196	25.2894	4.93401e-07	7.75243e-05
MSTRG.27398.7	NA	3	78597248	78714520	-	not_in_ref	not_in_ref	not_in_ref	not_in_ref	not_in_ref	no_EG	j	ENST00000464233	7.25627	1.94197	25.2606	5.00824e-07	7.83361e-05
MSTRG.26470.5	NA	3	12897220	13047504	-	not_in_ref	not_in_ref	not_in_ref	not_in_ref	not_in_ref	no_EG	j	ENST00000273221	8.32701	3.38108	25.2023	5.16201e-07	8.03793e-05
MSTRG.3188.12	NA	1	184690567	184754803	-	not_in_ref	not_in_ref	not_in_ref	not_in_ref	not_in_ref	no_EG	j	ENST00000367512	10.2817	2.74132	25.0847	5.48652e-07	8.50509e-05
ENST00000400337	ENSG00000182871	21	45405137	45513720	+	COL18A1-002	protein_coding	ENSG00000182871	COL18A1	protein_coding	80781	E	ENST00000400337	11.1249	2.66371	25.0243	5.66122e-07	8.73689e-05
MSTRG.12063.49	NA	14	91215757	91225352	+	not_in_ref	not_in_ref	not_in_ref	not_in_ref	not_in_ref	no_EG	j	ENST00000518868	8.47874	0.221382	24.979	5.79594e-07	8.90523e-05
MSTRG.29564.2	NA	4	77047158	77075620	-	not_in_ref	not_in_ref	not_in_ref	not_in_ref	not_in_ref	no_EG	j	ENST00000237654	8.38209	5.20737	24.9574	5.86097e-07	8.96547e-05
ENST00000369683	ENSG00000108039	10	109864766	109923511	-	XPNPEP1-016	protein_coding	ENSG00000108039	XPNPEP1	protein_coding	7511	E	ENST00000369683	6.41369	1.93235	24.9092	6.00961e-07	9.15254e-05
MSTRG.11129.5	NA	14	22946233	22956997	-	not_in_ref	not_in_ref	not_in_ref	not_in_ref	not_in_ref	no_EG	j	ENST00000206474	8.0739	2.58471	24.8179	6.301e-07	9.5466e-05
MSTRG.15698.21	NA	16	88715491	88723934	-	not_in_ref	not_in_ref	not_in_ref	not_in_ref	not_in_ref	no_EG	j	ENST00000301015	-5.03816	1.90605	24.8111	6.32334e-07	9.5466e-05
ENST00000517379	ENSG00000164684	8	80638534	80640695	-	ZNF704-006	processed_transcript	ENSG00000164684	ZNF704	protein_coding	619279	noCuffcomp	noCuffcomp	-6.2231	-0.973543	24.7091	6.66675e-07	0.000100215
ENST00000400919	ENSG00000162585	1	2184461	2194775	-	C1orf86-201	protein_coding	ENSG00000162585	C1orf86	protein_coding	199990	E	ENST00000400919	4.6707	-0.505383	24.6945	6.71751e-07	0.000100543
ENST00000491994	ENSG00000204351	6	31968475	31969751	+	SKIV2L-013	protein_coding	ENSG00000204351	SKIV2L	protein_coding	6499	noCuffcomp	noCuffcomp	8.23958	0.000638096	24.6663	6.81658e-07	0.000101588
ENST00000557450	ENSG00000126214	14	103629241	103701514	+	KLC1-020	protein_coding	ENSG00000126214	KLC1	protein_coding	3831	E	ENST00000557450	11.6481	1.05944	24.6361	6.92406e-07	0.000102748
MSTRG.22463.4	NA	2	112646099	112663825	+	not_in_ref	not_in_ref	not_in_ref	not_in_ref	not_in_ref	no_EG	j	ENST00000272542	-5.20333	3.19854	24.6239	6.96809e-07	0.000102962
MSTRG.11370.7	NA	14	45210463	45250180	-	not_in_ref	not_in_ref	not_in_ref	not_in_ref	not_in_ref	no_EG	j	ENST00000310806	-6.51458	1.5515	24.5504	7.239e-07	0.000106511
MSTRG.524.3	NA	1	21678903	21783226	-	not_in_ref	not_in_ref	not_in_ref	not_in_ref	not_in_ref	no_EG	j	ENST00000308271	6.95695	1.32312	24.5366	7.29134e-07	0.000106829
MSTRG.17549.8	NA	17	61401284	61409425	+	not_in_ref	not_in_ref	not_in_ref	not_in_ref	not_in_ref	no_EG	j	ENST00000419047	6.81859	2.67664	24.4786	7.51402e-07	0.000109629
MSTRG.17198.3	NA	17	47117738	47189176	-	not_in_ref	not_in_ref	not_in_ref	not_in_ref	not_in_ref	no_EG	j	ENST00000066544	7.66692	3.61549	24.4607	7.58392e-07	0.000110171
MSTRG.33067.1	NA	6	30595487	30626392	+	not_in_ref	not_in_ref	not_in_ref	not_in_ref	not_in_ref	no_EG	o	ENST00000475993	8.99752	0.601736	24.453	7.61463e-07	0.000110171
MSTRG.33848.7	NA	6	87596855	87667486	+	not_in_ref	not_in_ref	not_in_ref	not_in_ref	not_in_ref	no_EG	j	ENST00000392844	-6.26883	2.23448	24.426	7.72212e-07	0.000110843
MSTRG.19547.3	NA	19	16892951	17022164	-	not_in_ref	not_in_ref	not_in_ref	not_in_ref	not_in_ref	no_EG	j	ENST00000443236	3.28763	1.46481	24.4253	7.72494e-07	0.000110843
ENST00000232854	ENSG00000114735	3	50569197	50584935	+	HEMK1-003	protein_coding	ENSG00000114735	HEMK1	protein_coding	51409	E	ENST00000232854	-5.40868	0.437539	24.3972	7.8384e-07	0.000112008
MSTRG.12307.3	NA	14	103733753	103848297	-	not_in_ref	not_in_ref	not_in_ref	not_in_ref	not_in_ref	no_EG	j	ENST00000557082	7.20968	1.56296	24.3702	7.94887e-07	0.000113122
MSTRG.23738.16	NA	2	227473585	227554545	+	not_in_ref	not_in_ref	not_in_ref	not_in_ref	not_in_ref	no_EG	j	ENST00000409979	-5.90929	3.4262	24.3569	8.00411e-07	0.000113443
MSTRG.26297.35	NA	22	50579804	50582420	-	not_in_ref	not_in_ref	not_in_ref	not_in_ref	not_in_ref	no_EG	j	ENST00000492556	-5.46546	0.250882	24.2924	8.27659e-07	0.000116828
ENST00000586237	ENSG00000123143	19	14463875	14471859	+	PKN1-010	protein_coding	ENSG00000123143	PKN1	protein_coding	5585	noCuffcomp	noCuffcomp	8.17766	1.25338	24.2779	8.33889e-07	0.000117231
ENST00000376839	ENSG00000072110	14	68874783	68977566	-	ACTN1-007	protein_coding	ENSG00000072110	ACTN1	protein_coding	87	E	ENST00000376839	-5.71344	5.5351	24.2322	8.5392e-07	0.000119563
ENST00000488245	ENSG00000169764	2	63841902	63882649	+	UGP2-021	protein_coding	ENSG00000169764	UGP2	protein_coding	7360	E	ENST00000488245	-2.00329	3.17162	24.2051	8.66035e-07	0.000120772
ENST00000251303	ENSG00000132207	16	30193917	30197561	+	SLX1A-001	protein_coding	ENSG00000132207	SLX1A	protein_coding	548593	E	ENST00000251303	7.88587	1.56662	24.178	8.78312e-07	0.000121994
MSTRG.34703.4	NA	6	169215792	169223440	-	not_in_ref	not_in_ref	not_in_ref	not_in_ref	not_in_ref	no_EG	j	ENST00000366787	8.4386	1.43794	24.0948	9.17064e-07	0.000126869
ENST00000426997	ENSG00000237651	2	61145068	61164808	+	C2orf74-005	protein_coding	ENSG00000237651	C2orf74	protein_coding	339804	E	ENST00000426997	9.15036	1.60916	24.007	9.59878e-07	0.000132265
MSTRG.4338.14	NA	10	27505189	27538489	+	not_in_ref	not_in_ref	not_in_ref	not_in_ref	not_in_ref	no_EG	j	ENST00000423465	6.12048	1.48827	23.9838	9.7152e-07	0.00013334
ENST00000542471	ENSG00000176473	14	100382000	100530290	+	WDR25-006	protein_coding	ENSG00000176473	WDR25	protein_coding	79446	E	ENST00000542471	7.80849	0.190798	23.9565	9.8538e-07	0.00013471
MSTRG.29816.4	NA	4	105369565	105474022	-	not_in_ref	not_in_ref	not_in_ref	not_in_ref	not_in_ref	no_EG	j	ENST00000509031	7.91245	1.78646	23.8965	1.01655e-06	0.000138426
MSTRG.23960.22	NA	2	241646684	241673849	+	not_in_ref	not_in_ref	not_in_ref	not_in_ref	not_in_ref	no_EG	j	ENST00000405546	-7.13521	1.33063	23.8647	1.03348e-06	0.000140181
ENST00000353979	ENSG00000171307	10	97446204	97457366	+	ZDHHC16-005	protein_coding	ENSG00000171307	ZDHHC16	protein_coding	84287	E	ENST00000353979	6.76991	1.43179	23.7998	1.06891e-06	0.000144423
MSTRG.38934.3	NA	9	39803501	39810063	-	not_in_ref	not_in_ref	not_in_ref	not_in_ref	not_in_ref	no_EG	j	ENST00000627065	-6.45639	-1.04356	23.7783	1.08096e-06	0.000145485
MSTRG.30897.9	NA	5	41916304	41921636	+	not_in_ref	not_in_ref	not_in_ref	not_in_ref	not_in_ref	no_EG	j	ENST00000381647	6.95553	2.45203	23.7482	1.09798e-06	0.000147206
ENST00000462630	ENSG00000101361	20	2656640	2658393	+	NOP56-005	processed_transcript	ENSG00000101361	NOP56	protein_coding	10528	E	ENST00000462630	6.00397	2.05595	23.6806	1.13725e-06	0.000151408
ENST00000529750	ENSG00000023171	11	123525822	123627774	+	GRAMD1B-001	protein_coding	ENSG00000023171	GRAMD1B	protein_coding	57476	E	ENST00000529750	-4.8573	0.722193	23.6792	1.13805e-06	0.000151408
ENST00000588328	ENSG00000124299	19	33391423	33478084	-	PEPD-009	protein_coding	ENSG00000124299	PEPD	protein_coding	5184	E	ENST00000588328	4.88974	0.425764	23.6358	1.16404e-06	0.000154276
ENST00000597618	ENSG00000130726	19	58547135	58547906	+	TRIM28-008	retained_intron	ENSG00000130726	TRIM28	protein_coding	10155	E	ENST00000597618	-6.17715	1.61682	23.5937	1.18978e-06	0.000157087
MSTRG.10136.8	NA	13	20973045	21061466	-	not_in_ref	not_in_ref	not_in_ref	not_in_ref	not_in_ref	no_EG	j	ENST00000382592	7.88714	2.82185	23.5722	1.20316e-06	0.000158252
ENST00000380909	ENSG00000170638	22	50185915	50199564	+	TRABD-003	protein_coding	ENSG00000170638	TRABD	protein_coding	80305	E	ENST00000380909	6.62028	2.47026	23.5573	1.21246e-06	0.000158812
ENST00000375403	ENSG00000150401	13	113455819	113490691	-	DCUN1D2-001	nonsense_mediated_decay	ENSG00000150401	DCUN1D2	protein_coding	NA	E	ENST00000375403	-5.747	1.16446	23.5508	1.21656e-06	0.000158812
MSTRG.19527.72	NA	19	16645061	16659161	-	not_in_ref	not_in_ref	not_in_ref	not_in_ref	not_in_ref	no_EG	j	ENST00000593991	-6.64512	0.0114968	23.5349	1.22671e-06	0.000159537
ENST00000560229	ENSG00000182774	15	82536755	82540457	-	RPS17-002	retained_intron	ENSG00000182774	RPS17	protein_coding	6218	E	ENST00000560229	8.75529	0.212289	23.4842	1.25945e-06	0.000163184
ENST00000538259	ENSG00000182809	14	105474818	105480067	+	CRIP2-009	protein_coding	ENSG00000182809	CRIP2	protein_coding	1397	E	ENST00000538259	8.65032	1.63749	23.2564	1.4178e-06	0.000183018
MSTRG.16836.7	NA	17	38765722	38799522	-	not_in_ref	not_in_ref	not_in_ref	not_in_ref	not_in_ref	no_EG	j	ENST00000619039	8.23838	2.66705	23.2276	1.43916e-06	0.000185086
ENST00000468404	ENSG00000013374	7	151341804	151361249	+	NUB1-003	nonsense_mediated_decay	ENSG00000013374	NUB1	protein_coding	51667	E	ENST00000468404	5.75314	0.721086	23.2148	1.44879e-06	0.000185637
MSTRG.35607.8	NA	7	74376070	74405939	+	not_in_ref	not_in_ref	not_in_ref	not_in_ref	not_in_ref	no_EG	j	ENST00000223398	7.2463	1.34294	23.1957	1.46325e-06	0.000186801
ENST00000280699	ENSG00000151092	3	25719279	25783364	-	NGLY1-005	nonsense_mediated_decay	ENSG00000151092	NGLY1	protein_coding	55768	E	ENST00000280699	6.12898	1.84098	23.1546	1.49483e-06	0.000190134
ENST00000613488	ENSG00000275993	21	6111134	6123739	+	CH507-42P11.8-001	protein_coding	ENSG00000275993	CH507-42P11.8	protein_coding	102724428	E	ENST00000613488	13.099	3.31863	23.1417	1.50493e-06	0.000190618
ENST00000261978	ENSG00000119681	14	74498170	74612331	-	LTBP2-001	protein_coding	ENSG00000119681	LTBP2	protein_coding	4053	E	ENST00000261978	6.99856	3.63291	23.1357	1.50962e-06	0.000190618
MSTRG.7793.5	NA	11	124884218	124897846	-	not_in_ref	not_in_ref	not_in_ref	not_in_ref	not_in_ref	no_EG	j	ENST00000306534	5.63366	2.37608	23.0658	1.5655e-06	0.000196958
MSTRG.36541.10	NA	7	140453051	140479329	-	not_in_ref	not_in_ref	not_in_ref	not_in_ref	not_in_ref	no_EG	j	ENST00000255977	7.74492	3.61333	23.0319	1.59334e-06	0.000199164
MSTRG.28991.11	NA	4	5719340	5822480	+	not_in_ref	not_in_ref	not_in_ref	not_in_ref	not_in_ref	no_EG	j	ENST00000264956	-2.33281	1.78355	23.0305	1.5945e-06	0.000199164
ENST00000374553	ENSG00000158813	X	69616067	70039469	+	EDA-001	protein_coding	ENSG00000158813	EDA	protein_coding	1896	E	ENST00000374553	3.69833	-1.50822	22.8975	1.70878e-06	0.000212673
MSTRG.22082.1	NA	2	86720173	86777986	+	not_in_ref	not_in_ref	not_in_ref	not_in_ref	not_in_ref	no_EG	j	ENST00000283632	7.72943	3.49525	22.8643	1.73853e-06	0.000215339
MSTRG.19902.14	NA	19	34450284	34469398	+	not_in_ref	not_in_ref	not_in_ref	not_in_ref	not_in_ref	no_EG	j	ENST00000246548	-6.33082	4.16573	22.8598	1.74261e-06	0.000215339
ENST00000288078	ENSG00000157353	16	70454421	70480274	+	FUK-001	protein_coding	ENSG00000157353	FUK	protein_coding	197258	E	ENST00000288078	6.69725	0.821923	22.8051	1.79292e-06	0.000220303
MSTRG.35235.5	NA	7	38723024	38874791	-	not_in_ref	not_in_ref	not_in_ref	not_in_ref	not_in_ref	no_EG	j	ENST00000310301	6.77196	3.97864	22.8012	1.79651e-06	0.000220303
MSTRG.16838.1	NA	17	38701686	38704747	+	not_in_ref	not_in_ref	not_in_ref	not_in_ref	not_in_ref	no_EG	o	ENST00000612330	4.77108	1.35296	22.7956	1.80181e-06	0.000220303
ENST00000423894	ENSG00000187118	3	28241618	28319771	+	CMC1-004	protein_coding	ENSG00000187118	CMC1	protein_coding	NA	E	ENST00000423894	8.65675	0.609378	22.7594	1.83599e-06	0.000223695
ENST00000261443	ENSG00000009307	1	114717295	114757974	-	CSDE1-003	protein_coding	ENSG00000009307	CSDE1	protein_coding	7812	E	ENST00000261443	-5.69345	8.91231	22.724	1.87015e-06	0.00022706
MSTRG.557.1	NA	1	23359435	23370432	-	not_in_ref	not_in_ref	not_in_ref	not_in_ref	not_in_ref	no_EG	j	ENST00000314011	7.42174	1.23184	22.6568	1.9367e-06	0.00023432
ENST00000539144	ENSG00000140853	16	57020713	57083519	+	NLRC5-013	protein_coding	ENSG00000140853	NLRC5	protein_coding	84166	E	ENST00000539144	-6.41552	2.80946	22.6148	1.97957e-06	0.000238473
MSTRG.8302.3	NA	12	15107790	15221268	-	not_in_ref	not_in_ref	not_in_ref	not_in_ref	not_in_ref	no_EG	j	ENST00000256953	7.75606	1.85196	22.6097	1.98476e-06	0.000238473
ENST00000586868	ENSG00000105254	19	36116072	36125947	+	TBCB-005	protein_coding	ENSG00000105254	TBCB	protein_coding	1155	noCuffcomp	noCuffcomp	8.59237	1.28449	22.5119	2.08844e-06	0.000250066
ENST00000226207	ENSG00000109061	17	10492307	10518543	-	MYH1-001	protein_coding	ENSG00000109061	MYH1	protein_coding	4619	E	ENST00000226207	-4.30578	3.50978	22.4316	2.17759e-06	0.000259844
ENST00000541650	ENSG00000118507	6	131135737	131283532	+	AKAP7-005	protein_coding	ENSG00000118507	AKAP7	protein_coding	9465	E	ENST00000541650	8.00568	1.60521	22.4126	2.19927e-06	0.000261533
ENST00000589189	ENSG00000141429	18	35627429	35710292	+	GALNT1-004	nonsense_mediated_decay	ENSG00000141429	GALNT1	protein_coding	2589	E	ENST00000589189	-5.82868	3.0756	22.3503	2.27172e-06	0.000269226
MSTRG.39542.9	NA	9	104781002	104816497	-	not_in_ref	not_in_ref	not_in_ref	not_in_ref	not_in_ref	no_EG	j	ENST00000374736	6.2333	3.70165	22.3365	2.28812e-06	0.000269601
ENST00000199389	ENSG00000086232	7	6022244	6059230	-	EIF2AK1-001	protein_coding	ENSG00000086232	EIF2AK1	protein_coding	27102	E	ENST00000199389	7.63926	0.942674	22.3346	2.29041e-06	0.000269601
MSTRG.33562.6	NA	6	44127720	44155388	+	not_in_ref	not_in_ref	not_in_ref	not_in_ref	not_in_ref	no_EG	j	ENST00000259746	-4.60751	1.62465	22.3045	2.32666e-06	0.00027289
MSTRG.19507.8	NA	19	15380057	15418968	-	not_in_ref	not_in_ref	not_in_ref	not_in_ref	not_in_ref	no_EG	j	ENST00000594594	-5.71734	0.815966	22.2983	2.33407e-06	0.00027289
MSTRG.31976.2	NA	5	140245070	140258911	-	not_in_ref	not_in_ref	not_in_ref	not_in_ref	not_in_ref	no_EG	j	ENST00000261813	6.93258	1.81429	22.2666	2.37299e-06	0.000276509
ENST00000398473	ENSG00000161813	12	50400899	50480004	+	LARP4-002	protein_coding	ENSG00000161813	LARP4	protein_coding	113251	E	ENST00000398473	6.72879	1.83503	22.2152	2.43738e-06	0.000283062
MSTRG.25135.7	NA	21	33230038	33262756	+	not_in_ref	not_in_ref	not_in_ref	not_in_ref	not_in_ref	no_EG	j	ENST00000382238	-5.93103	0.268516	22.1755	2.48834e-06	0.000288018
MSTRG.20155.17	NA	19	40778362	40796938	+	not_in_ref	not_in_ref	not_in_ref	not_in_ref	not_in_ref	no_EG	j	ENST00000594136	8.09242	2.40867	22.1559	2.51377e-06	0.000289994
ENST00000264771	ENSG00000127419	4	932387	958656	+	TMEM175-001	protein_coding	ENSG00000127419	TMEM175	protein_coding	84286	E	ENST00000264771	6.47557	2.08766	22.1423	2.53171e-06	0.000291096
MSTRG.38363.10	NA	8	143915155	143973444	-	not_in_ref	not_in_ref	not_in_ref	not_in_ref	not_in_ref	no_EG	j	ENST00000436759	5.18435	4.00187	22.0996	2.58866e-06	0.000296662
ENST00000372858	ENSG00000090621	1	39560816	39576401	-	PABPC4-002	protein_coding	ENSG00000090621	PABPC4	protein_coding	8761	E	ENST00000372858	8.50068	2.07758	22.0122	2.70923e-06	0.000309459
ENST00000378543	ENSG00000162585	1	2189548	2194750	-	C1orf86-006	protein_coding	ENSG00000162585	C1orf86	protein_coding	199990	E	ENST00000378543	6.16151	1.51326	21.9817	2.7526e-06	0.00031274
MSTRG.20245.2	NA	19	43622375	43627754	-	not_in_ref	not_in_ref	not_in_ref	not_in_ref	not_in_ref	no_EG	j	ENST00000222374	8.36687	-0.191153	21.9794	2.75598e-06	0.00031274
MSTRG.18685.4	NA	18	55222341	55588619	-	not_in_ref	not_in_ref	not_in_ref	not_in_ref	not_in_ref	no_EG	j	ENST00000398339	6.46681	1.2946	21.8962	2.87805e-06	0.000325529
MSTRG.6383.6	NA	11	44932348	44950833	-	not_in_ref	not_in_ref	not_in_ref	not_in_ref	not_in_ref	no_EG	j	ENST00000533940	4.8817	2.86262	21.8769	2.90709e-06	0.000327746
ENST00000402914	ENSG00000172264	20	15196858	16053197	+	MACROD2-011	protein_coding	ENSG00000172264	MACROD2	protein_coding	140733	E	ENST00000402914	1.50118	-0.256521	21.8567	2.93796e-06	0.000330154
ENST00000229416	ENSG00000001084	6	53497341	53545129	-	GCLC-001	protein_coding	ENSG00000001084	GCLC	protein_coding	2729	E	ENST00000229416	-6.01501	2.20511	21.8204	2.99408e-06	0.000335375
ENST00000586790	ENSG00000173581	19	55648143	55653161	+	CCDC106-002	protein_coding	ENSG00000173581	CCDC106	protein_coding	NA	E	ENST00000586790	7.7012	1.21098	21.7977	3.02958e-06	0.000338261
MSTRG.17995.12	NA	17	81245008	81294961	-	not_in_ref	not_in_ref	not_in_ref	not_in_ref	not_in_ref	no_EG	j	ENST00000374759	13.0774	2.45909	21.7227	3.15034e-06	0.000350616
MSTRG.16260.3	NA	17	17843510	17972322	-	not_in_ref	not_in_ref	not_in_ref	not_in_ref	not_in_ref	no_EG	j	ENST00000379504	6.30687	3.53661	21.6687	3.2403e-06	0.000359477
ENST00000498385	ENSG00000240972	22	23894698	23895227	+	MIF-003	retained_intron	ENSG00000240972	MIF	protein_coding	NA	E	ENST00000498385	6.3381	3.47735	21.6431	3.28388e-06	0.000363152
ENST00000579793	ENSG00000264343	1	146146521	146229026	-	NOTCH2NL-001	protein_coding	ENSG00000264343	NOTCH2NL	protein_coding	NA	E	ENST00000579793	-4.57361	-0.627377	21.6356	3.29671e-06	0.000363412
ENST00000593678	ENSG00000125651	19	6379878	6391952	-	GTF2F1-006	protein_coding	ENSG00000125651	GTF2F1	protein_coding	2962	E	ENST00000593678	-5.05959	1.56088	21.626	3.31333e-06	0.000363504
MSTRG.12428.5	NA	15	30110302	30132763	+	not_in_ref	not_in_ref	not_in_ref	not_in_ref	not_in_ref	no_EG	j	ENST00000568486	6.2875	1.17709	21.623	3.31848e-06	0.000363504
MSTRG.26635.5	NA	3	31532972	31637593	+	not_in_ref	not_in_ref	not_in_ref	not_in_ref	not_in_ref	no_EG	j	ENST00000295770	5.24848	1.58648	21.5899	3.37623e-06	0.000367807
MSTRG.25908.13	NA	22	35744148	35836324	-	not_in_ref	not_in_ref	not_in_ref	not_in_ref	not_in_ref	no_EG	j	ENST00000359369	-3.65121	0.9662	21.5884	3.37894e-06	0.000367807
ENST00000622724	ENSG00000054523	1	10232329	10381596	+	KIF1B-202	protein_coding	ENSG00000054523	KIF1B	protein_coding	23095	E	ENST00000622724	7.27101	1.21606	21.5707	3.41014e-06	0.000370043
MSTRG.10040.3	NA	12	131895613	131921951	+	not_in_ref	not_in_ref	not_in_ref	not_in_ref	not_in_ref	no_EG	j	ENST00000321867	-5.17803	2.30109	21.4918	3.55343e-06	0.000384391
ENST00000584985	ENSG00000126351	17	40062810	40093867	+	THRA-005	protein_coding	ENSG00000126351	THRA	protein_coding	7067	E	ENST00000584985	-6.4513	1.09197	21.4583	3.61611e-06	0.000389956
MSTRG.15898.5	NA	17	4538904	4554912	-	not_in_ref	not_in_ref	not_in_ref	not_in_ref	not_in_ref	no_EG	j	ENST00000381556	-5.03067	1.20722	21.407	3.7141e-06	0.000398428
ENST00000340852	ENSG00000101294	20	31514428	31569567	+	HM13-011	protein_coding	ENSG00000101294	HM13	protein_coding	81502	E	ENST00000340852	6.2096	3.4866	21.4052	3.71762e-06	0.000398428
ENST00000398997	ENSG00000130772	1	28329055	28335964	+	MED18-201	protein_coding	ENSG00000130772	MED18	protein_coding	54797	E	ENST00000398997	8.90251	0.176823	21.2744	3.98014e-06	0.00042525
MSTRG.14522.25	NA	16	16326872	16334172	+	not_in_ref	not_in_ref	not_in_ref	not_in_ref	not_in_ref	no_EG	j	ENST00000458669	7.26934	2.04048	21.2662	3.99718e-06	0.000425761
ENST00000623834	ENSG00000279457	1	184923	195411	-	FO538757.2-201	protein_coding	ENSG00000279457	FO538757.2	protein_coding	102723897	E	ENST00000623834	9.00345	0.401379	21.2257	4.08262e-06	0.000433531
ENST00000356207	ENSG00000077782	8	38412730	38468616	-	FGFR1-004	protein_coding	ENSG00000077782	FGFR1	protein_coding	2260	E	ENST00000356207	4.98823	4.7723	21.1587	4.22784e-06	0.000447584
ENST00000320741	ENSG00000181092	3	186842690	186858463	+	ADIPOQ-002	protein_coding	ENSG00000181092	ADIPOQ	protein_coding	9370	E	ENST00000320741	-4.82272	4.30456	21.1379	4.27395e-06	0.000451091
ENST00000601166	ENSG00000105221	19	40237990	40255177	-	AKT2-044	nonsense_mediated_decay	ENSG00000105221	AKT2	protein_coding	208	noCuffcomp	noCuffcomp	-5.21279	0.839748	21.1094	4.33792e-06	0.000456455
ENST00000439128	ENSG00000137601	4	169393275	169612612	-	NEK1-001	protein_coding	ENSG00000137601	NEK1	protein_coding	4750	E	ENST00000439128	5.80735	1.60062	21.0945	4.37171e-06	0.00045862
ENST00000565574	ENSG00000257017	16	72054629	72061009	+	HP-003	protein_coding	ENSG00000257017	HP	protein_coding	3240	E	ENST00000565574	5.32608	3.40954	21.0528	4.4679e-06	0.000467299
ENST00000346964	ENSG00000075711	3	197042560	197298576	-	DLG1-001	protein_coding	ENSG00000075711	DLG1	protein_coding	1739	E	ENST00000346964	6.59859	1.89807	21.0348	4.51018e-06	0.000470305
ENST00000539068	ENSG00000096060	6	35573585	35688915	-	FKBP5-202	protein_coding	ENSG00000096060	FKBP5	protein_coding	2289	E	ENST00000539068	-5.16265	1.90989	21.0251	4.53306e-06	0.000471276
ENST00000412788	ENSG00000130600	11	1995176	1997814	-	H19-002	lincRNA	ENSG00000130600	H19	processed_transcript	283120	E	ENST00000412788	5.62752	3.866	21.0175	4.55117e-06	0.000471746
ENST00000409675	ENSG00000081177	14	69191555	69242358	+	EXD2-007	protein_coding	ENSG00000081177	EXD2	protein_coding	55218	E	ENST00000409675	8.02579	2.05679	21.0091	4.57101e-06	0.000472392
ENST00000476998	ENSG00000130638	22	45703973	45738839	+	ATXN10-004	processed_transcript	ENSG00000130638	ATXN10	protein_coding	25814	noCuffcomp	noCuffcomp	-2.90552	0.25667	20.9313	4.7606e-06	0.000490525
MSTRG.10171.11	NA	13	23328984	23375386	-	not_in_ref	not_in_ref	not_in_ref	not_in_ref	not_in_ref	no_EG	j	ENST00000382298	7.12279	-0.0515565	20.8525	4.96055e-06	0.000509616
MSTRG.20220.16	NA	19	42269371	42295777	+	not_in_ref	not_in_ref	not_in_ref	not_in_ref	not_in_ref	no_EG	j	ENST00000572681	6.35816	3.44396	20.7851	5.13804e-06	0.000526293
MSTRG.7698.12	NA	11	119168875	119184016	+	not_in_ref	not_in_ref	not_in_ref	not_in_ref	not_in_ref	no_EG	j	ENST00000409109	5.3124	2.672	20.7753	5.1646e-06	0.000527457
MSTRG.32033.2	NA	5	141853196	141869589	-	not_in_ref	not_in_ref	not_in_ref	not_in_ref	not_in_ref	no_EG	j	ENST00000287008	6.35888	1.48828	20.764	5.1951e-06	0.000529016
MSTRG.10856.7	NA	13	110307388	110513027	+	not_in_ref	not_in_ref	not_in_ref	not_in_ref	not_in_ref	no_EG	j	ENST00000360467	6.82884	5.67111	20.7514	5.22923e-06	0.000530935
MSTRG.32467.8	NA	5	176346065	176361731	-	not_in_ref	not_in_ref	not_in_ref	not_in_ref	not_in_ref	no_EG	j	ENST00000298569	9.60902	3.09943	20.7212	5.31257e-06	0.000537825
ENST00000403325	ENSG00000185838	22	19788415	19854843	-	GNB1L-003	protein_coding	ENSG00000185838	GNB1L	protein_coding	NA	E	ENST00000403325	8.68187	-0.317922	20.7025	5.36455e-06	0.000540481
MSTRG.8498.6	NA	12	29500831	29783754	-	not_in_ref	not_in_ref	not_in_ref	not_in_ref	not_in_ref	no_EG	j	ENST00000551659	-6.20349	1.76547	20.7006	5.36995e-06	0.000540481
ENST00000372936	ENSG00000188917	X	101009542	101052083	-	TRMT2B-003	protein_coding	ENSG00000188917	TRMT2B	protein_coding	79979	E	ENST00000372936	-4.32213	-0.364098	20.6216	5.59609e-06	0.000561615
MSTRG.36424.13	NA	7	130534032	130540027	+	not_in_ref	not_in_ref	not_in_ref	not_in_ref	not_in_ref	no_EG	i	ENST00000425248	-4.11864	3.01231	20.6122	5.62378e-06	0.000562767
MSTRG.28991.4	NA	4	5719252	5828975	+	not_in_ref	not_in_ref	not_in_ref	not_in_ref	not_in_ref	no_EG	j	ENST00000264956	7.95692	1.07352	20.5969	5.66875e-06	0.000565637
MSTRG.4034.6	NA	1	248850014	248858930	-	not_in_ref	not_in_ref	not_in_ref	not_in_ref	not_in_ref	no_EG	j	ENST00000451251	-5.57655	-0.754875	20.5754	5.73274e-06	0.000570383
MSTRG.33157.12	NA	6	31268946	31357158	-	not_in_ref	not_in_ref	not_in_ref	not_in_ref	not_in_ref	no_EG	j	ENST00000412585	-6.17228	3.36609	20.5494	5.81105e-06	0.000576523
ENST00000429952	ENSG00000231609	2	63043922	63047711	-	AC009501.4-001	antisense	ENSG00000231609	AC009501.4	antisense	100132215	E	ENST00000429952	5.85025	0.0974798	20.5203	5.90011e-06	0.00058369
MSTRG.18012.4	NA	17	81509989	81520057	-	not_in_ref	not_in_ref	not_in_ref	not_in_ref	not_in_ref	no_EG	j	ENST00000615544	-4.85462	7.2587	20.5109	5.92924e-06	0.000584906
ENST00000367697	ENSG00000051620	6	138404247	138413173	+	HEBP2-003	protein_coding	ENSG00000051620	HEBP2	protein_coding	NA	E	ENST00000367697	7.9294	3.26669	20.4622	6.08205e-06	0.000598281
ENST00000426744	ENSG00000205189	8	80486213	80526264	+	ZBTB10-201	protein_coding	ENSG00000205189	ZBTB10	protein_coding	65986	E	ENST00000426744	7.20918	1.90556	20.4351	6.16883e-06	0.000605103
ENST00000493382	ENSG00000114698	3	146194357	146251143	-	PLSCR4-003	protein_coding	ENSG00000114698	PLSCR4	protein_coding	57088	E	ENST00000493382	-2.92992	-0.0229912	20.4123	6.24267e-06	0.000609337
MSTRG.33839.58	NA	6	85677084	85678640	-	not_in_ref	not_in_ref	not_in_ref	not_in_ref	not_in_ref	no_EG	j	ENST00000623901	-5.28101	1.51337	20.4097	6.25125e-06	0.000609337
MSTRG.26845.20	NA	3	44625137	44645210	+	not_in_ref	not_in_ref	not_in_ref	not_in_ref	not_in_ref	no_EG	j	ENST00000334075	-5.93889	0.716282	20.4056	6.26464e-06	0.000609337
MSTRG.36424.11	NA	7	130531311	130546900	+	not_in_ref	not_in_ref	not_in_ref	not_in_ref	not_in_ref	no_EG	i	ENST00000425248	-4.31701	3.82854	20.3772	6.35827e-06	0.000616008
ENST00000620924	ENSG00000102471	13	79481474	79554096	+	NDFIP2-005	protein_coding	ENSG00000102471	NDFIP2	protein_coding	54602	noCuffcomp	noCuffcomp	6.48037	2.61835	20.3741	6.3687e-06	0.000616008
ENST00000343028	ENSG00000064115	12	26973195	27014394	-	TM7SF3-001	protein_coding	ENSG00000064115	TM7SF3	protein_coding	NA	E	ENST00000343028	7.76416	1.37986	20.3547	6.43345e-06	0.000620542
ENST00000468694	ENSG00000136279	7	44044711	44061637	+	DBNL-019	protein_coding	ENSG00000136279	DBNL	protein_coding	28988	E	ENST00000468694	7.53662	1.90069	20.2954	6.63605e-06	0.000638311
MSTRG.32506.27	NA	5	177519931	177547209	-	not_in_ref	not_in_ref	not_in_ref	not_in_ref	not_in_ref	no_EG	j	ENST00000506955	-6.25106	0.998226	20.2705	6.72293e-06	0.000644881
ENST00000504948	ENSG00000017260	3	130894178	131003150	+	ATP2C1-004	protein_coding	ENSG00000017260	ATP2C1	protein_coding	27032	E	ENST00000504948	-5.43158	2.09222	20.2569	6.77103e-06	0.000647547
ENST00000560468	ENSG00000182718	15	60360967	60397986	-	ANXA2-020	protein_coding	ENSG00000182718	ANXA2	protein_coding	302	noCuffcomp	noCuffcomp	-6.65597	2.01589	20.2521	6.78802e-06	0.000647547
ENST00000243662	ENSG00000123892	11	88113242	88175467	-	RAB38-001	protein_coding	ENSG00000123892	RAB38	protein_coding	23682	E	ENST00000243662	7.28839	0.533951	20.2396	6.83253e-06	0.000650007
ENST00000259241	ENSG00000136720	2	128265480	128318577	-	HS6ST1-001	protein_coding	ENSG00000136720	HS6ST1	protein_coding	9394	E	ENST00000259241	-4.47549	1.23356	20.2036	6.9622e-06	0.000660534
ENST00000546433	ENSG00000084112	12	108784797	108807690	-	SSH1-004	nonsense_mediated_decay	ENSG00000084112	SSH1	protein_coding	54434	noCuffcomp	noCuffcomp	8.07972	2.08963	20.195	6.99365e-06	0.00066171
ENST00000470196	ENSG00000160226	21	44329891	44331968	-	C21orf2-006	processed_transcript	ENSG00000160226	C21orf2	protein_coding	755	E	ENST00000470196	6.38038	0.480337	20.1312	7.23082e-06	0.00068229
MSTRG.16312.16	NA	17	18856401	18930969	+	not_in_ref	not_in_ref	not_in_ref	not_in_ref	not_in_ref	no_EG	j	ENST00000268835	-5.3712	1.07566	20.1041	7.33385e-06	0.000690137
ENST00000421200	ENSG00000167615	19	54458415	54461712	+	LENG8-006	protein_coding	ENSG00000167615	LENG8	protein_coding	114823	noCuffcomp	noCuffcomp	8.14931	0.668275	20.0814	7.42156e-06	0.000696503
ENST00000381093	ENSG00000146938	X	5890032	6227203	-	NLGN4X-201	protein_coding	ENSG00000146938	NLGN4X	protein_coding	57502	E	ENST00000381093	7.86821	-0.563878	20.0639	7.48958e-06	0.000700993
ENST00000336898	ENSG00000158555	11	75434640	75525903	-	GDPD5-001	protein_coding	ENSG00000158555	GDPD5	protein_coding	81544	E	ENST00000336898	5.64804	2.3915	20.0553	7.52331e-06	0.000701717
ENST00000369752	ENSG00000162777	1	111187174	111204409	-	DENND2D-001	protein_coding	ENSG00000162777	DENND2D	protein_coding	79961	E	ENST00000369752	6.09803	1.14045	20.0517	7.53774e-06	0.000701717
MSTRG.17952.2	NA	17	79932343	80013558	-	not_in_ref	not_in_ref	not_in_ref	not_in_ref	not_in_ref	no_EG	j	ENST00000310924	7.22235	4.31626	20.0359	7.60014e-06	0.000705634
MSTRG.29906.24	NA	4	113332067	113383738	+	not_in_ref	not_in_ref	not_in_ref	not_in_ref	not_in_ref	no_EG	j	ENST00000506722	7.20658	2.25024	20.0164	7.67809e-06	0.00071097
ENST00000584838	ENSG00000169733	17	82048749	82050990	-	RFNG-012	processed_transcript	ENSG00000169733	RFNG	protein_coding	5986	E	ENST00000584838	-4.78051	0.959986	19.9944	7.76689e-06	0.00071728
MSTRG.20208.1	NA	19	41929953	41959269	-	not_in_ref	not_in_ref	not_in_ref	not_in_ref	not_in_ref	no_EG	j	ENST00000222008	8.13995	1.92948	19.9844	7.80766e-06	0.000719133
ENST00000620167	ENSG00000236882	5	95856869	95860133	+	LINC01554-201	lincRNA	ENSG00000236882	LINC01554	lincRNA	202299	E	ENST00000620167	-5.21573	0.0918081	19.924	8.05813e-06	0.000740239
ENST00000396941	ENSG00000100897	14	24115326	24124029	+	DCAF11-003	protein_coding	ENSG00000100897	DCAF11	protein_coding	80344	E	ENST00000396941	5.43226	2.50241	19.8917	8.19533e-06	0.000750856
ENST00000435794	ENSG00000131503	5	140526033	140539856	+	ANKHD1-012	protein_coding	ENSG00000131503	ANKHD1	protein_coding	404734;54882	E	ENST00000435794	-7.46629	2.08227	19.8697	8.29048e-06	0.000757575
MSTRG.35309.5	NA	7	44072128	44080902	-	not_in_ref	not_in_ref	not_in_ref	not_in_ref	not_in_ref	no_EG	j	ENST00000242248	-1.44158	-0.824235	19.7562	8.79773e-06	0.000801818
ENST00000510818	ENSG00000164172	5	53098071	53109742	-	MOCS2-007	protein_coding	ENSG00000164172	MOCS2	protein_coding	4338	E	ENST00000510818	6.86071	1.8876	19.7158	8.98532e-06	0.00081677
ENST00000404393	ENSG00000128309	22	37019772	37029796	+	MPST-005	protein_coding	ENSG00000128309	MPST	protein_coding	4357	E	ENST00000404393	7.20525	-1.17887	19.647	9.3147e-06	0.000844501
ENST00000575734	ENSG00000166292	17	55719918	55732121	-	TMEM100-002	protein_coding	ENSG00000166292	TMEM100	protein_coding	55273	E	ENST00000575734	6.928	0.745356	19.5961	9.56647e-06	0.000865068
ENST00000244576	ENSG00000124613	6	27388718	27403904	+	ZNF391-001	protein_coding	ENSG00000124613	ZNF391	protein_coding	NA	E	ENST00000244576	5.36838	1.30828	19.5909	9.59247e-06	0.000865166
MSTRG.25985.4	NA	22	38219296	38272931	-	not_in_ref	not_in_ref	not_in_ref	not_in_ref	not_in_ref	no_EG	j	ENST00000436674	-2.87161	2.85493	19.5859	9.61767e-06	0.000865192
MSTRG.23101.7	NA	2	178431976	178451381	-	not_in_ref	not_in_ref	not_in_ref	not_in_ref	not_in_ref	no_EG	j	ENST00000424699	-5.43443	2.16816	19.5208	9.95094e-06	0.000891938
MSTRG.38008.42	NA	8	102255373	102347000	-	not_in_ref	not_in_ref	not_in_ref	not_in_ref	not_in_ref	no_EG	j	ENST00000520539	-6.51036	4.58456	19.5179	9.96636e-06	0.000891938
MSTRG.33478.5	NA	6	41789974	41840959	-	not_in_ref	not_in_ref	not_in_ref	not_in_ref	not_in_ref	no_EG	j	ENST00000373010	3.88666	1.30824	19.4881	1.01227e-05	0.000902116
ENST00000253513	ENSG00000131203	8	39913869	39928444	+	IDO1-002	nonsense_mediated_decay	ENSG00000131203	IDO1	protein_coding	NA	E	ENST00000253513	8.74346	0.729605	19.4864	1.01321e-05	0.000902116
MSTRG.34544.17	NA	6	157084766	157210692	+	not_in_ref	not_in_ref	not_in_ref	not_in_ref	not_in_ref	no_EG	j	ENST00000346085	7.1676	2.39538	19.4588	1.02793e-05	0.000912883
MSTRG.3501.5	NA	1	209840875	209843696	+	not_in_ref	not_in_ref	not_in_ref	not_in_ref	not_in_ref	no_EG	j	ENST00000491415	-5.02118	-0.174066	19.4379	1.03923e-05	0.000920571
MSTRG.14064.21	NA	16	579091	584108	+	not_in_ref	not_in_ref	not_in_ref	not_in_ref	not_in_ref	no_EG	j	ENST00000443147	7.04474	0.458179	19.4155	1.05151e-05	0.000929076
ENST00000235329	ENSG00000116688	1	11980312	12013508	+	MFN2-001	protein_coding	ENSG00000116688	MFN2	protein_coding	9927	E	ENST00000235329	6.68126	2.7965	19.4051	1.05724e-05	0.000931765
[truncated: 807 more rows]

## Sheet: Ob_Nw
Supplemetary Data 2: Differential espression of adipocyte transcripts in lean and obese subjects, by RNASeq analysis.
[truncated: 573 more rows]
