# Supplementary material for: Transcriptome Profiles of Human Visceral Adipocytes in Obesity and Colorectal Cancer Unravel the Effects of Body Mass Index and Polyunsaturated Fatty Acids on Genes and Biological Processes Related to Tumorigenesis
Source: Front Immunol. 2019 Feb 19;10:265. doi: 10.3389/fimmu.2019.00265 (PMC6389660; doi:10.3389/fimmu.2019.00265)
Supplement: Supplementary file 4 [file Data_Sheet_4.xlsx]

## Sheet:  NwCRC_Nw 
Supplemental Data 4:GO and KEGG pathway enrichment analysis of DET in the diﬀerent comparisons
TranscriptRecID	EnsG	GeneSymbol	GeneType	logFC	PValue	FDR	-	Category	Term	Count	%	PValue	FDR	Genes
ENST00000474486	ENSG00000158882	TOMM40L	protein_coding	14.3592	3.9304e-16	1.36479e-11	-	GOTERM_BP_DIRECT	GO:0007179~transforming growth factor beta receptor signaling pathway	9	1.90678	0.00257791	0.0296803	LTBP2, ARHGEF18, SMAD6, CREB1, TGFBR2, TGFB3, HPGD, ACVR1, CITED2
ENST00000570322	ENSG00000170291	ELP5	protein_coding	19.2113	2.5049e-12	8.36189e-09	-	GOTERM_BP_DIRECT	GO:0051145~smooth muscle cell differentiation	4	0.847458	0.00401641	0.0296803	TMEM204, NFATC4, MKL1, ACVR1
ENST00000326587	ENSG00000179222	MAGED1	protein_coding	6.26146	2.64891e-12	8.36189e-09	-	GOTERM_BP_DIRECT	GO:0046033~AMP metabolic process	3	0.635593	0.00630016	0.0296803	AK3, AK2, AMPD2
ENST00000558498	ENSG00000104043	ATP8B4	protein_coding	11.306	1.33964e-11	2.90735e-08	-	GOTERM_BP_DIRECT	GO:0045893~positive regulation of transcription, DNA-templated	24	5.08475	0.00782556	0.0296803	ENY2, MMS19, ELF2, GPBP1L1, PCID2, CREB1, TGFB3, FHL2, ILF3, STAT1, FOXN3, CITED2, MAGED1, EPC1, CHD8, SMARCD3, KDM8, TGFB1I1, KAT6B, MAPRE3, KLF4, ACVR1, NR1H3, NFATC1
ENST00000274008	ENSG00000145375	SPATA5	protein_coding	20.5262	2.91062e-11	5.47085e-08	-	GOTERM_BP_DIRECT	GO:0051353~positive regulation of oxidoreductase activity	3	0.635593	0.00928955	0.0296803	RIPK3, ABL1, ABL2
ENST00000521308	ENSG00000198624	CCDC69	protein_coding	8.5507	2.76911e-10	3.20515e-07	-	GOTERM_BP_DIRECT	GO:0006357~regulation of transcription from RNA polymerase II promoter	21	4.44915	0.0106587	0.0296803	ENY2, NFKBIZ, PAM, ELF2, CREB1, ELP6, FHL2, ABCA2, DDX5, ECM1, BUD31, RBBP8, MAGED1, NRF1, ATP2B4, SMARCD3, TEF, ETV2, TCEB1, TFAP2C, CHD4
ENST00000607788	ENSG00000108963	DPH1	protein_coding	5.77564	9.45866e-10	8.01079e-07	-	GOTERM_BP_DIRECT	GO:0098609~cell-cell adhesion	15	3.17797	0.0109348	0.0296803	CAST, YWHAZ, TBC1D10A, PI4KA, KTN1, STAT1, PPP1R13L, ANXA2, EPB41L1, SH3GLB1, EXOC3, CNN2, NOP56, SEPT9, GOLGA2
ENST00000484960	ENSG00000183605	SFXN4	protein_coding	5.04339	1.1433e-09	9.02268e-07	-	GOTERM_BP_DIRECT	GO:0050798~activated T cell proliferation	3	0.635593	0.0127847	0.0297339	EPHB6, FYN, ABL1
ENST00000591084	ENSG00000161265	U2AF1L4	protein_coding	3.78891	1.28109e-09	9.40052e-07	-	GOTERM_BP_DIRECT	GO:1902715~positive regulation of interferon-gamma secretion	3	0.635593	0.0167577	0.0297339	CD2, ABL1, LGALS9
ENST00000259043	ENSG00000136527	TRA2B	protein_coding	7.70596	1.3741e-09	9.54287e-07	-	GOTERM_BP_DIRECT	GO:0042060~wound healing	7	1.48305	0.0171834	0.0297339	EPPK1, CCL20, TGFBR2, TGFB3, DSP, CNN2, DCN
ENST00000432408	ENSG00000113851	CRBN	protein_coding	8.29003	2.63634e-09	1.69527e-06	-	GOTERM_BP_DIRECT	GO:0002576~platelet degranulation	8	1.69492	0.0172144	0.0297339	ISLR, CD9, PSAP, TGFB3, SERPINA3, ACTN1, TTN, ECM1
ENST00000394934	ENSG00000197746	PSAP	protein_coding	7.29538	4.91207e-09	2.67591e-06	-	GOTERM_BP_DIRECT	GO:0047497~mitochondrion transport along microtubule	3	0.635593	0.0211817	0.032083	KIF1B, RHOT1, LRPPRC
ENST00000553460	ENSG00000165782	TMEM55B	protein_coding	4.69004	7.09711e-09	3.62412e-06	-	GOTERM_BP_DIRECT	GO:0042127~regulation of cell proliferation	11	2.33051	0.0219515	0.032083	SAT1, TYK2, CCDC88A, FYN, TGFBR2, TGFB3, BIRC6, CNN2, TFAP2C, ABL1, ABL2
ENST00000527677	ENSG00000104522	TSTA3	protein_coding	6.04996	1.01843e-08	4.91165e-06	-	GOTERM_BP_DIRECT	GO:0007067~mitotic nuclear division	13	2.75424	0.0277258	0.0373998	ANAPC16, HAUS5, ANAPC5, BIRC6, CEP63, CCNG1, RBBP8, KLHL13, CLIP1, NEK9, NSMCE2, ABL1, MAPRE3
ENST00000493802	ENSG00000162645	GBP2	protein_coding	4.72478	1.21527e-08	5.62653e-06	-	GOTERM_BP_DIRECT	GO:0030154~cell differentiation	20	4.23729	0.0314097	0.0373998	SH3PXD2B, ELF2, ABHD5, TGFBR2, SRA1, NOTCH2NL, RFNG, PTPRU, FOXN3, ZNF3, CITED2, TYK2, TBCB, FYN, TPT1, SPATA2, ETV2, ANGPT1, TGFB1I1, SPATA5
ENST00000397124	ENSG00000167965	MLST8	protein_coding	6.21868	2.09693e-08	9.21692e-06	-	GOTERM_BP_DIRECT	GO:0051225~spindle assembly	4	0.847458	0.0314946	0.0373998	HAUS5, CEP63, CHD4, GOLGA2
ENST00000522563	ENSG00000156831	NSMCE2	protein_coding	5.6789	2.27564e-08	9.64505e-06	-	GOTERM_BP_DIRECT	GO:0055114~oxidation-reduction process	24	5.08475	0.0338179	0.0377965	SH3PXD2B, PAM, KDM6A, SDR39U1, ENOX2, NCF4, CYP2S1, LDHD, DHRSX, KIAA1456, ECSIT, ALDH3A2, OGFOD1, P3H1, ALDH1A2, ALDH7A1, NNT, DIO2, KDM4B, CYBRD1, KDM8, TSTA3, GLYR1, HPGD
ENST00000560330	ENSG00000166819	PLIN1	protein_coding	6.76613	3.23091e-08	1.26632e-05	-	GOTERM_BP_DIRECT	GO:0010923~negative regulation of phosphatase activity	5	1.05932	0.0421184	0.0444584	PPP1R26, WNK1, SPRED1, WDR81, RBM26
ENST00000441917	ENSG00000089053	ANAPC5	protein_coding	7.43778	3.29527e-08	1.26632e-05	-	GOTERM_BP_DIRECT	GO:0061024~membrane organization	4	0.847458	0.0486348	0.0486348	CLN3, YWHAZ, CCDC88A, SGCE
ENST00000590753	ENSG00000108861	DUSP3	protein_coding	7.49932	3.41586e-08	1.2754e-05	-
ENST00000478503	ENSG00000109686	SH3D19	protein_coding	4.90303	3.50475e-08	1.29467e-05	-	Category	Term	Count	%	PValue	FDR	Genes
ENST00000583057	ENSG00000101773	RBBP8	protein_coding	3.65713	3.73371e-08	1.35051e-05	-	GOTERM_MF_DIRECT	GO:0005515~protein binding	260	55.0847	5.75126e-05	0.0009775	PPP1R26, CHMP3, DZIP3, LTBP2, LDHD, VPS53, CD53, CITED2, ACTG1, MAGED1, OGN, N4BP2L2, EPC1, SH3YL1, ATP2B4, HTRA2, INTS6, AAGAB, RAPGEF4, CFI, AUP1, PLD3, RCOR3, PCID2, NCF4, PIK3CD, WNK1, FAM192A, PTPRU, RPS18, RPS16, DCAF8, CCR5, PGM1, NEK9, TGFB1I1, MRPL43, TALDO1, OCRL, ACP1, CHCHD6, UPRT, LETMD1, BCOR, GCNT1, FCHO1, NR1H3, KANSL1, SMAD6, ANKMY2, TGFBR2, SRA1, NOTCH2NL, DDX5, ECM1, SEPT11, GC…
ENST00000476012	ENSG00000055950	MRPL43	protein_coding	6.2164	9.62796e-08	2.98501e-05	-	GOTERM_MF_DIRECT	GO:0030374~ligand-dependent nuclear receptor transcription coactivator activity	7	1.48305	0.00163851	0.0106667	ENY2, DCAF6, ZMIZ2, SMARCD3, SRA1, ACTN1, BUD31
ENST00000411912	ENSG00000115464	USP34	protein_coding	6.92865	1.52378e-07	4.4093e-05	-	GOTERM_MF_DIRECT	GO:0019899~enzyme binding	19	4.02542	0.00188236	0.0106667	MMS19, P4HB, RCOR3, CREB1, TSPAN5, ANKMY2, DDX5, TTN, STAT1, ECM1, LGALS9, CTNNBL1, N4BP2L2, HSPA2, HNRNPUL1, FYN, POLD1, DYM, SLC4A2
ENST00000352456	ENSG00000105323	HNRNPUL1	protein_coding	6.965	3.16438e-07	7.63054e-05	-	GOTERM_MF_DIRECT	GO:0035091~phosphatidylinositol binding	8	1.69492	0.00537338	0.0228369	SH3PXD2B, SH3YL1, CCDC88A, AIDA, SNX17, NCF4, SNX16, SNX10
ENST00000368074	ENSG00000132716	DCAF8	protein_coding	5.94708	3.23275e-07	7.68862e-05	-	GOTERM_MF_DIRECT	GO:0030145~manganese ion binding	6	1.27119	0.00802213	0.0272752	MPPE1, PEPD, PRIMPOL, ABL1, ABL2, PCK1
ENST00000622724	ENSG00000054523	KIF1B	protein_coding	8.01909	3.39542e-07	8.02058e-05	-	GOTERM_MF_DIRECT	GO:0003713~transcription coactivator activity	14	2.9661	0.00978245	0.027717	ENY2, MAGED1, MMS19, NACA, SMARCD3, SRA1, RIPK3, FHL2, NFATC4, TGFB1I1, DDX5, MKL1, CITED2, NR1H3
ENST00000344461	ENSG00000160055	TMEM234	protein_coding	11.8771	3.43844e-07	8.06732e-05	-	GOTERM_MF_DIRECT	GO:0098641~cadherin binding involved in cell-cell adhesion	15	3.17797	0.0146827	0.0313753	CAST, YWHAZ, TBC1D10A, PI4KA, KTN1, STAT1, PPP1R13L, ANXA2, EPB41L1, SH3GLB1, EXOC3, CNN2, NOP56, SEPT9, GOLGA2
ENST00000336934	ENSG00000133121	STARD13	protein_coding	6.76177	3.68804e-07	8.59486e-05	-	GOTERM_MF_DIRECT	GO:0016853~isomerase activity	4	0.847458	0.0147648	0.0313753	FUOM, P4HB, TSTA3, HSD17B4
ENST00000381809	ENSG00000147853	AK3	protein_coding	6.28247	4.20406e-07	9.47934e-05	-	GOTERM_MF_DIRECT	GO:0034713~type I transforming growth factor beta receptor binding	3	0.635593	0.0199799	0.0375776	SMAD6, TGFBR2, TGFB3
ENST00000430710	ENSG00000100888	CHD8	protein_coding	4.94214	5.26163e-07	0.000116003	-	GOTERM_MF_DIRECT	GO:0016787~hydrolase activity	11	2.33051	0.0221045	0.0375776	MPPE1, PSMC6, NCEH1, ABHD5, INPP5D, CTSB, ENTPD4, OCRL, IAH1, AFMID, MEST
ENST00000422445	ENSG00000103037	SETD6	protein_coding	7.40156	6.54774e-07	0.000137796	-	GOTERM_MF_DIRECT	GO:0019902~phosphatase binding	5	1.05932	0.0256163	0.0395888	SH3YL1, PPP1R26, DZIP3, WNK1, SPRED1
ENST00000613099	ENSG00000048707	VPS13D	protein_coding	2.65255	8.94612e-07	0.00017452	-	GOTERM_MF_DIRECT	GO:0000166~nucleotide binding	16	3.38983	0.0293063	0.0415173	RALY, ENOX2, NT5C3B, TRA2B, ATP1A4, ABCA2, U2AF1L4, TMEM63B, SRSF5, HNRNPH3, LARP4, EIF3G, LARP7, POLD1, RBMS3, RBM26
ENST00000545889	ENSG00000130779	CLIP1	protein_coding	4.93534	9.05049e-07	0.000175569	-	GOTERM_MF_DIRECT	GO:0003723~RNA binding	22	4.66102	0.035338	0.0462113	RALY, DZIP3, PCID2, APOBEC3G, ILF3, KHNYN, U2AF1L4, FUBP1, PSMA1, SRSF5, RPS18, HNRNPH3, RPS16, EIF3G, HNRNPUL1, PPP1R8, LARP7, RBMS3, NOP56, BAZ2A, LRPPRC, RBM26
ENST00000504691	ENSG00000145730	PAM	protein_coding	6.55611	1.04583e-06	0.000197366	-	GOTERM_MF_DIRECT	GO:0003824~catalytic activity	10	2.11864	0.0470368	0.0493736	PLD3, TALDO1, SYN1, CWF19L2, PARP3, TSTA3, PCYT2, HPGD, PHYKPL, MEST
ENST00000320027	ENSG00000120694	HSPH1	protein_coding	5.91214	1.38133e-06	0.000247083	-	GOTERM_MF_DIRECT	GO:0051015~actin filament binding	8	1.69492	0.048011	0.0493736	ANXA8, AIF1L, ACTN1, IQGAP2, ABL1, TTN, ABL2, LRPPRC
ENST00000540960	ENSG00000111642	CHD4	protein_coding	5.39252	1.38283e-06	0.000247083	-	GOTERM_MF_DIRECT	GO:0005178~integrin binding	7	1.48305	0.0480803	0.0493736	CD9, P4HB, LAMB2, ACTN1, MFGE8, ECM2, ADAM15
ENST00000443035	ENSG00000174485	DENND4A	protein_coding	6.10437	1.46715e-06	0.000257111	-	GOTERM_MF_DIRECT	GO:0042171~lysophosphatidic acid acyltransferase activity	2	0.423729	0.0493736	0.0493736	SH3GLB1, ABHD5
ENST00000543711	ENSG00000144959	NCEH1	protein_coding	5.62685	1.47348e-06	0.000257111	-
ENST00000357103	ENSG00000006831	ADIPOR2	protein_coding	5.22675	1.50593e-06	0.000261459	-	Category	Term	Count	%	PValue	FDR	Genes
ENST00000415383	ENSG00000155229	MMS19	protein_coding	1.43046	1.52913e-06	0.000264167	-	GOTERM_CC_DIRECT	GO:0070062~extracellular exosome	100	21.1864	0.000139685	0.001343	CHMP3, LTBP2, LGMN, IQGAP2, CD53, TTN, ACTG1, N4BP2L2, OGN, VPS13D, AIF1L, TPT1, CFI, AUP1, PLD3, STK25, ACTN1, MFGE8, HLA-B, MGAT1, PSMA1, RPS18, IGSF8, LAT2, RPS16, VAMP8, PGM1, DSP, PAM, TALDO1, NAPG, OCRL, ACP1, P3H1, LAMB2, MEST, BMP3, P4HB, TBC1D10A, AK2, RFNG, DDX5, ECM1, LGALS9, SEPT11, TNFSF10, PSMC6, NRF1, CPNE1, HGS, TM7SF3, HSPH1, TMEM59, SERPINA3, ANGPT1, FCGR3A, IAH1, PEPD, ARHGEF18…
ENST00000559704	ENSG00000196547	MAN2A2	protein_coding	6.12555	1.6053e-06	0.000275953	-	GOTERM_CC_DIRECT	GO:0005829~cytosol	114	24.1525	0.000157759	0.001343	CAST, SNCAIP, CHMP3, NT5C3B, VPS53, ADH1B, IQGAP2, APOBEC3G, TTN, ACTG1, HTRA2, AAGAB, RAPGEF4, SPRED1, MLST8, CARS, ANAPC5, NCF4, PIK3CD, WNK1, ACTN1, BCAP31, PSMA1, RPS18, RPS16, VAMP8, PGM1, RIPK3, CLIP1, NEK9, GBP2, ANAPC16, FUOM, TALDO1, CHKB, CTPS2, OCRL, RRAGB, OAZ2, EPHB6, UPRT, EIF3G, TBC1D10A, SMAD6, TGFBR2, PSMC6, PDE7A, RHOT1, CPNE1, HGS, ABL1, ABL2, SAT1, ENOX2, PRKAG2, DPH1, AFMID, …
ENST00000594665	ENSG00000104880	ARHGEF18	protein_coding	5.7153	2.32352e-06	0.000373527	-	GOTERM_CC_DIRECT	GO:0016020~membrane	80	16.9492	0.000428011	0.00192525	MMS19, CAST, VPS53, CTNNBL1, ACTG1, CLPTM1L, AP2B1, ATP2B4, HTRA2, NECAP1, SLC4A2, RAPGEF4, PARD3B, CFI, PIGA, AUP1, CLN3, CCDC88A, NCF4, WNK1, PI4KA, KTN1, MFGE8, HLA-B, BCAP31, TYK2, MGAT1, PNPLA8, RPS18, IGSF8, NNT, LARP4, RPS16, GNB2, NRM, VAMP8, DOC2B, NKIRAS1, C16ORF58, LRPPRC, ACVR1, PAM, SNX17, SFXN4, ABCA2, ANXA6, P3H1, CD9, HSPA2, SH3GLB1, KLC1, MSLN, SLC39A7, CNN2, HSD17B4, GCNT1, CHD4…
ENST00000503889	ENSG00000180104	EXOC3	protein_coding	5.13289	3.03472e-06	0.000458164	-	GOTERM_CC_DIRECT	GO:0031012~extracellular matrix	19	4.02542	0.000453021	0.00192525	P4HB, LTBP2, ADAMTSL4, LMNA, TGFB3, MFGE8, DCN, DDX5, ECM1, ANXA2, ACTG1, OGN, RPS18, LAMB2, RPS16, DSP, ATP5A1, TGFB1I1, TPSAB1
ENST00000306481	ENSG00000168944	CEP120	protein_coding	4.79607	3.10271e-06	0.00046449	-	GOTERM_CC_DIRECT	GO:0005654~nucleoplasm	92	19.4915	0.00298131	0.00884253	MMS19, KDM6A, PPP1R26, ELF2, PRKAG2, CTNNBL1, FUBP1, HSPH1, EPC1, SMARCD3, INTS6, AAGAB, RNF38, NSMCE2, PATZ1, SPRED1, MLST8, MKL1, CGRRF1, ANAPC5, POLR1D, TLE3, SEL1L3, VEZT, ECSIT, RBBP6, RBBP8, PSMA1, RPS18, RPS16, CCND3, TBCB, ZMIZ2, LARP7, TFAP2C, LRPPRC, ANAPC16, YWHAZ, TRA2B, FAM193B, FHL2, CCNG1, NXT2, MPPE1, CHD8, MDC1, SLC39A7, BAZ2A, CHD4, NR1H3, DDX42, NFATC1, MSH6, BRD1, L3MBTL2, KAN…
ENST00000475179	ENSG00000203326	ZNF525	protein_coding	3.92054	3.43412e-06	0.000505281	-	GOTERM_CC_DIRECT	GO:0005765~lysosomal membrane	16	3.38983	0.00362939	0.00884253	TM9SF1, CLN3, NAPG, PLEKHM1, PSAP, SLC12A4, AP5S1, ABCA2, TMEM55B, RRAGB, ANXA2, ANXA6, GNB2, VAMP8, TMEM59, CLCN7
ENST00000344604	ENSG00000106823	ECM2	protein_coding	5.3643	3.72662e-06	0.00053918	-	GOTERM_CC_DIRECT	GO:0031902~late endosome membrane	9	1.90678	0.00364104	0.00884253	ANXA6, ANXA8, CHMP3, VAMP8, TMEM59, AP5S1, SNX16, TMEM55B, ANXA2
ENST00000486276	ENSG00000136147	PHF11	protein_coding	4.35346	4.0131e-06	0.000573461	-	GOTERM_CC_DIRECT	GO:0005925~focal adhesion	20	4.23729	0.0042764	0.00908735	P4HB, YWHAZ, WASF1, PI4KA, FHL2, ACTN1, ACTG1, ANXA6, CD9, RPS18, SORBS3, DCAF6, CCND3, RPS16, GNB2, MDC1, AIF1L, SLC4A2, CNN2, TGFB1I1
ENST00000424697	ENSG00000166526	ZNF3	protein_coding	5.85005	4.25491e-06	0.000605523	-	GOTERM_CC_DIRECT	GO:0005739~mitochondrion	49	10.3814	0.00573023	0.0108238	TUSC3, LDHD, MPV17, WDR81, MRPS30, HTRA2, MRPL37, CLN3, ECSIT, TIMM44, BCAP31, ACADVL, ALDH7A1, KIF1B, NNT, ZMIZ2, RIPK3, CTSB, TFAP2C, LRPPRC, YWHAZ, PGS1, NAPG, ABHD6, CTPS2, CHCHD6, MRPL20, ANXA6, HSPA2, SH3GLB1, LIAS, XAF1, HSD17B4, BCOR, SPATA5, ETFA, PLA2G15, PSAP, AK3, ILF3, MRRF, SH3BP5, TMEM8B, FYN, PTCD2, RHOT1, COQ10B, ATP5A1, ABL1
ENST00000375477	ENSG00000126226	PCID2	protein_coding	4.12163	4.64433e-06	0.000650282	-	GOTERM_CC_DIRECT	GO:0005743~mitochondrial inner membrane	21	4.44915	0.00735597	0.0125052	PGS1, LDHD, MPV17, AK2, SFXN4, ECSIT, CHCHD6, TIMM44, MRPS30, ALDH3A2, MRPL20, ACADVL, NNT, NDUFV1, ATP5S, MRPL37, COQ10B, LETMD1, ATP5A1, SLC25A16, MRPL43
ENST00000430088	ENSG00000185825	BCAP31	protein_coding	5.25861	4.92701e-06	0.000676227	-	GOTERM_CC_DIRECT	GO:0000790~nuclear chromatin	11	2.33051	0.0224846	0.0336143	MSH6, PAM, SMARCD3, CREB1, STAT1, BUD31, KLF4, CHD4, NFATC1, CITED2, NR1H3
ENST00000471426	ENSG00000144642	RBMS3	protein_coding	1.45932	5.12232e-06	0.000692092	-	GOTERM_CC_DIRECT	GO:0005634~nucleus	155	32.839	0.0237277	0.0336143	RALY, MMS19, TGFB3, KIAA1456, ZNF251, CTNNBL1, CITED2, ACTG1, MAGED1, EPC1, N4BP2L2, HTRA2, SMARCD3, TPT1, RNF38, PATZ1, ANAPC5, RCOR3, FAM192A, POLR2J3, ZNF3, FOXN3, OGFOD1, PSMA1, RPS18, REC8, DCAF6, DCAF8, ZNF433, NEK9, ZNF383, DSP, TFAP2C, LRPPRC, TALDO1, EFCAB6, GPBP1L1, BEX4, OCRL, RRAGB, OAZ2, UPRT, EIF3G, TEF, BCOR, DDX42, NR1H3, KANSL1, SMAD6, PRIMPOL, SRA1, ARID3B, NR4A1, WHSC1, DDX5, G…
ENST00000393688	ENSG00000116337	AMPD2	protein_coding	6.48988	6.59615e-06	0.000848314	-	GOTERM_CC_DIRECT	GO:0005913~cell-cell adherens junction	15	3.17797	0.0313576	0.0401133	CAST, YWHAZ, TBC1D10A, PI4KA, KTN1, STAT1, PPP1R13L, ANXA2, EPB41L1, SH3GLB1, EXOC3, CNN2, NOP56, SEPT9, GOLGA2
ENST00000326005	ENSG00000180304	OAZ2	protein_coding	1.3537	6.91066e-06	0.000885483	-	GOTERM_CC_DIRECT	GO:0031410~cytoplasmic vesicle	12	2.54237	0.0330345	0.0401133	TM9SF1, ARHGAP30, CCDC88A, CHMP3, KIF1B, SH3GLB1, KLC1, SNX17, ABCA2, ENTPD4, CLCN7, RIN3
ENST00000602784	ENSG00000103549	RNF40	protein_coding	6.48133	7.04225e-06	0.000892464	-	GOTERM_CC_DIRECT	GO:0005614~interstitial matrix	3	0.635593	0.0399641	0.0452926	SMOC2, ADAMTSL4, ECM2
ENST00000353739	ENSG00000137075	RNF38	protein_coding	6.25802	7.14429e-06	0.000902103	-	GOTERM_CC_DIRECT	GO:0005856~cytoskeleton	16	3.38983	0.0444347	0.0472119	TCHH, EPPK1, WASF1, ARHGEF18, TYK2, ACTG1, SORBS3, EPB41L1, HTRA2, FAAH, DSP, CNN2, SGCE, INPP5D, TGFB1I1, LRPPRC
ENST00000619293	ENSG00000100211	CBY1	protein_coding	4.53362	7.81307e-06	0.000968933	-	GOTERM_CC_DIRECT	GO:0070390~transcription export complex 2	2	0.423729	0.0489911	0.0489911	ENY2, PCID2
ENST00000496559	ENSG00000144749	LRIG1	protein_coding	4.49396	7.89136e-06	0.000972236	-
ENST00000358689	ENSG00000197217	ENTPD4	protein_coding	4.11153	8.6438e-06	0.00104218	-	Category	Term	Count	%	PValue	FDR	Genes
ENST00000552645	ENSG00000050426	LETMD1	protein_coding	2.03992	8.90971e-06	0.00106683	-	KEGG_PATHWAY	hsa00230:Purine metabolism	13	2.75424	0.00216625	0.00441788	NT5C3B, PDE7A, POLR1D, POLD1, PGM1, PDE1A, AK3, AK2, ENTPD4, AMPD2, POLR2J3, PFAS, APRT
ENST00000491200	ENSG00000096746	HNRNPH3	protein_coding	4.66364	1.04266e-05	0.00121495	-	KEGG_PATHWAY	hsa04380:Osteoclast differentiation	11	2.33051	0.00220894	0.00441788	TYK2, FCGR2B, FYN, CREB1, NCF4, PIK3CD, TGFBR2, FHL2, FCGR3A, STAT1, NFATC1
ENST00000533919	ENSG00000167792	NDUFV1	protein_coding	3.96278	1.57588e-05	0.00172621	-	KEGG_PATHWAY	hsa04142:Lysosome	8	1.69492	0.0391387	0.0484608	CLN3, PLA2G15, PSAP, LGMN, ABCA2, CTSB, ENTPD4, CTSV
ENST00000368667	ENSG00000010810	FYN	protein_coding	6.29843	1.7817e-05	0.00190073	-	KEGG_PATHWAY	hsa04612:Antigen processing and presentation	6	1.27119	0.0484608	0.0484608	HSPA2, CREB1, LGMN, HSPA4, HLA-B, CTSB
ENST00000593812	ENSG00000127526	SLC35E1	protein_coding	5.67374	1.82069e-05	0.00192749	-
ENST00000592571	ENSG00000130159	ECSIT	protein_coding	5.52339	1.90943e-05	0.00200373	-
ENST00000570616	ENSG00000124067	SLC12A4	protein_coding	2.60464	1.91002e-05	0.00200373	-
ENST00000577734	ENSG00000141627	DYM	protein_coding	4.66135	1.92386e-05	0.00201217	-
ENST00000556962	ENSG00000125375	ATP5S	protein_coding	3.06433	2.33087e-05	0.0023059	-
ENST00000318364	ENSG00000055950	MRPL43	protein_coding	1.69583	2.45857e-05	0.00241162	-
ENST00000472434	ENSG00000143537	ADAM15	protein_coding	5.68608	2.64947e-05	0.00254667	-
ENST00000463972	ENSG00000112473	SLC39A7	protein_coding	5.26697	2.65492e-05	0.00254667	-
ENST00000568377	ENSG00000205084	TMEM231	protein_coding	5.86128	2.79693e-05	0.00266815	-
ENST00000555353	ENSG00000053254	FOXN3	protein_coding	4.64499	3.05106e-05	0.00287114	-
ENST00000450991	ENSG00000089818	NECAP1	protein_coding	5.04276	3.06311e-05	0.00287469	-
ENST00000464520	ENSG00000107331	ABCA2	protein_coding	3.94884	3.24144e-05	0.00296981	-
ENST00000371893	ENSG00000137216	TMEM63B	protein_coding	6.26596	3.42262e-05	0.00311935	-
ENST00000322897	ENSG00000134265	NAPG	protein_coding	4.96868	3.85679e-05	0.00342515	-
ENST00000474223	ENSG00000130066	SAT1	protein_coding	5.2843	4.02976e-05	0.00353798	-
ENST00000614374	ENSG00000197885	NKIRAS1	protein_coding	5.70919	4.16452e-05	0.00362428	-
ENST00000351439	ENSG00000115252	PDE1A	protein_coding	4.62763	4.41459e-05	0.00380377	-
ENST00000479802	ENSG00000231500	RPS18	protein_coding	4.95119	4.64353e-05	0.00393273	-
ENST00000463153	ENSG00000011198	ABHD5	protein_coding	5.38553	5.18471e-05	0.00431736	-
ENST00000484746	ENSG00000058668	ATP2B4	protein_coding	5.13173	5.28548e-05	0.00434912	-
ENST00000557154	ENSG00000100650	SRSF5	protein_coding	4.65512	5.49993e-05	0.00445901	-
ENST00000373469	ENSG00000132792	CTNNBL1	protein_coding	5.11126	5.53122e-05	0.00445901	-
ENST00000491511	ENSG00000144815	NXPE3	protein_coding	4.07481	5.5346e-05	0.00445901	-
ENST00000496365	ENSG00000068438	FTSJ1	protein_coding	4.17304	6.41943e-05	0.00498676	-
ENST00000372742	ENSG00000125962	ARMCX5	protein_coding	5.63651	6.62891e-05	0.00511516	-
ENST00000548386	ENSG00000196531	NACA	protein_coding	4.48693	6.81397e-05	0.00521164	-
ENST00000514678	ENSG00000182923	CEP63	protein_coding	4.74472	7.01824e-05	0.00532099	-
ENST00000372691	ENSG00000102409	BEX4	protein_coding	3.75002	7.06083e-05	0.00533734	-
ENST00000440943	ENSG00000078618	NRD1	protein_coding	5.00599	7.22911e-05	0.00540999	-
ENST00000299381	ENSG00000166295	ANAPC16	protein_coding	5.00157	7.78993e-05	0.00577986	-
ENST00000523965	ENSG00000120896	SORBS3	protein_coding	2.84474	8.02975e-05	0.00591985	-
ENST00000514825	ENSG00000170606	HSPA4	protein_coding	2.76992	8.12417e-05	0.00597677	-
ENST00000565848	ENSG00000123358	NR4A1	protein_coding	5.08285	9.23659e-05	0.00653221	-
ENST00000352222	ENSG00000115317	HTRA2	protein_coding	6.50189	9.94589e-05	0.00692106	-
ENST00000555405	ENSG00000119638	NEK9	protein_coding	3.91955	0.000113426	0.00766265	-
ENST00000612242	ENSG00000081019	RSBN1	protein_coding	5.14666	0.000115416	0.00773685	-
ENST00000493287	ENSG00000242485	MRPL20	protein_coding	4.57355	0.00012109	0.00800899	-
ENST00000571105	ENSG00000185813	PCYT2	protein_coding	4.09063	0.000124322	0.00818409	-
ENST00000521688	ENSG00000120533	ENY2	protein_coding	4.99129	0.000143098	0.00918471	-
ENST00000566157	ENSG00000087263	OGFOD1	protein_coding	4.58176	0.000147023	0.00940656	-
ENST00000595565	ENSG00000104980	TIMM44	protein_coding	6.56719	0.000186187	0.0112437	-
ENST00000532202	ENSG00000177156	TALDO1	protein_coding	4.37869	0.000191856	0.0114665	-
ENST00000353788	ENSG00000104497	SNX16	protein_coding	5.19451	0.000200795	0.0119391	-
ENST00000513253	ENSG00000159685	CHCHD6	protein_coding	4.81615	0.000234377	0.0133418	-
ENST00000470395	ENSG00000116209	TMEM59	protein_coding	4.83824	0.000239097	0.0135439	-
ENST00000470099	ENSG00000118961	C2orf43	protein_coding	4.89485	0.000272744	0.0150177	-
ENST00000419828	ENSG00000172354	GNB2	protein_coding	4.95881	0.00029536	0.0159908	-
ENST00000515671	ENSG00000138758	SEPT11	protein_coding	3.44354	0.000295481	0.0159908	-
ENST00000282251	ENSG00000152404	CWF19L2	protein_coding	3.54862	0.000305649	0.016404	-
ENST00000402093	ENSG00000219200	RNASEK	protein_coding	4.7465	0.000316624	0.0168368	-
ENST00000543322	ENSG00000049883	PTCD2	protein_coding	4.61806	0.000321621	0.017012	-
ENST00000250263	ENSG00000104626	ERI1	protein_coding	4.87495	0.000323346	0.0170377	-
ENST00000529978	ENSG00000250305	KIAA1456	protein_coding	1.70178	0.000350966	0.0181894	-
ENST00000321348	ENSG00000071967	CYBRD1	protein_coding	5.37703	0.000371124	0.0190353	-
ENST00000464385	ENSG00000078618	NRD1	protein_coding	4.67035	0.000381823	0.0193838	-
ENST00000420906	ENSG00000109685	WHSC1	protein_coding	4.17197	0.000396117	0.0200215	-
ENST00000370935	ENSG00000165675	ENOX2	protein_coding	1.50368	0.000402125	0.0202368	-
ENST00000338523	ENSG00000086300	SNX10	protein_coding	1.79729	0.000407839	0.0203767	-
ENST00000370938	ENSG00000116761	CTH	protein_coding	3.92161	0.000442709	0.0216516	-
ENST00000620797	ENSG00000115204	MPV17	protein_coding	4.44889	0.0004444	0.0216749	-
ENST00000403712	ENSG00000035115	SH3YL1	protein_coding	3.19459	0.000454127	0.0220547	-
ENST00000312943	ENSG00000146094	DOK3	protein_coding	3.91665	0.000471511	0.0227399	-
ENST00000368551	ENSG00000148803	FUOM	protein_coding	3.36753	0.000487864	0.02327	-
ENST00000422643	ENSG00000106123	EPHB6	protein_coding	5.13131	0.000495798	0.0235514	-
ENST00000380241	ENSG00000047230	CTPS2	protein_coding	4.50697	0.000505493	0.0238813	-
ENST00000288840	ENSG00000137834	SMAD6	protein_coding	4.18311	0.000528597	0.0248214	-
ENST00000420541	ENSG00000121858	TNFSF10	protein_coding	2.60508	0.000532629	0.0249259	-
ENST00000295962	ENSG00000163686	ABHD6	protein_coding	3.37539	0.000546331	0.02543	-
ENST00000469467	ENSG00000164889	SLC4A2	protein_coding	3.67188	0.000565448	0.0262144	-
ENST00000340828	ENSG00000113328	CCNG1	protein_coding	5.42035	0.000571982	0.0264116	-
ENST00000159111	ENSG00000127663	KDM4B	protein_coding	3.33764	0.000609926	0.0276129	-
ENST00000573320	ENSG00000185359	HGS	protein_coding	3.10317	0.000648914	0.0289254	-
ENST00000397081	ENSG00000091428	RAPGEF4	protein_coding	3.5728	0.000840413	0.0353299	-
ENST00000630983	ENSG00000186184	POLR1D	protein_coding	3.1866	0.000843022	0.0353967	-
ENST00000590665	ENSG00000152234	ATP5A1	protein_coding	5.54907	0.000876014	0.0364296	-
ENST00000524606	ENSG00000129084	PSMA1	protein_coding	3.3588	0.000883695	0.0366612	-
ENST00000392322	ENSG00000115415	STAT1	protein_coding	2.9436	0.000890521	0.0367687	-
ENST00000511946	ENSG00000189157	FAM47E	protein_coding	3.76862	0.000926391	0.0377185	-
ENST00000264663	ENSG00000112992	NNT	protein_coding	3.65402	0.000941433	0.0381451	-
ENST00000419884	ENSG00000138095	LRPPRC	protein_coding	4.58948	0.000953623	0.0384595	-
ENST00000538932	ENSG00000179195	ZNF664	protein_coding	3.64079	0.000984968	0.0395399	-
ENST00000377254	ENSG00000144115	THNSL2	protein_coding	3.97691	0.00103517	0.0410332	-
ENST00000494699	ENSG00000115694	STK25	protein_coding	2.53482	0.00119882	0.0461878	-
ENST00000444458	ENSG00000115355	CCDC88A	protein_coding	4.59157	0.00122046	0.0468798	-
ENST00000467196	ENSG00000101361	NOP56	protein_coding	5.50253	0.00124047	0.047375	-
ENST00000588281	ENSG00000087157	PGS1	protein_coding	3.33691	0.00126475	0.0479446	-
ENST00000586868	ENSG00000105254	TBCB	protein_coding	3.97753	0.00131875	0.0496663	-
ENST00000621247	ENSG00000105672	ETV2	protein_coding	1.86174	0.00132156	0.049718	-
ENST00000357121	ENSG00000122126	OCRL	protein_coding	-21.3032	2.33329e-14	2.02552e-10
ENST00000431419	ENSG00000106245	BUD31	protein_coding	-15.3745	2.61288e-12	8.36189e-09
ENST00000478396	ENSG00000136536	MARCH7	protein_coding	-15.0171	3.73091e-12	1.0272e-08
ENST00000393353	ENSG00000115641	FHL2	protein_coding	-15.3992	3.84563e-12	1.0272e-08
ENST00000605750	ENSG00000188321	ZNF559	protein_coding	-22.7805	4.54734e-12	1.10582e-08
ENST00000338844	ENSG00000172236	TPSAB1	protein_coding	-12.6573	1.78558e-11	3.64721e-08
ENST00000620651	ENSG00000196588	MKL1	protein_coding	-15.4312	3.91251e-11	6.7929e-08
ENST00000412516	ENSG00000169084	DHRSX	protein_coding	-15.7616	7.1141e-11	1.12286e-07
ENST00000380909	ENSG00000170638	TRABD	protein_coding	-9.03724	9.60911e-11	1.39028e-07
ENST00000509622	ENSG00000174720	LARP7	protein_coding	-8.18111	1.37511e-10	1.83652e-07
ENST00000581031	ENSG00000126858	RHOT1	protein_coding	-14.9619	4.46308e-10	4.69625e-07
ENST00000340666	ENSG00000008056	SYN1	protein_coding	-11.5412	5.94114e-10	5.73056e-07
ENST00000376406	ENSG00000137337	MDC1	protein_coding	-13.7263	8.18992e-10	7.48386e-07
ENST00000522566	ENSG00000164930	FZD6	protein_coding	-12.5446	8.72898e-10	7.73128e-07
ENST00000344641	ENSG00000148187	MRRF	protein_coding	-9.15441	8.90598e-10	7.73128e-07
ENST00000573947	ENSG00000072210	ALDH3A2	protein_coding	-15.398	1.13167e-09	9.02268e-07
ENST00000272065	ENSG00000143727	ACP1	protein_coding	-11.5074	1.29946e-09	9.40052e-07
ENST00000495008	ENSG00000198919	DZIP3	protein_coding	-10.8389	2.43676e-09	1.62719e-06
ENST00000261978	ENSG00000119681	LTBP2	protein_coding	-11.6111	3.13991e-09	1.91281e-06
ENST00000246194	ENSG00000125970	RALY	protein_coding	-9.98261	4.92124e-09	2.67591e-06
ENST00000253458	ENSG00000131149	GSE1	protein_coding	-7.62748	7.70593e-09	3.76874e-06
ENST00000590503	ENSG00000188283	ZNF383	protein_coding	-11.1943	1.17089e-08	5.53379e-06
ENST00000297450	ENSG00000154188	ANGPT1	protein_coding	-10.6381	1.1793e-08	5.53379e-06
ENST00000589389	ENSG00000140632	GLYR1	protein_coding	-13.7574	1.26658e-08	5.78692e-06
ENST00000611366	ENSG00000100918	REC8	protein_coding	-9.80089	2.27766e-08	9.64505e-06
ENST00000223215	ENSG00000106484	MEST	protein_coding	-6.91864	3.10852e-08	1.26632e-05
ENST00000615648	ENSG00000261150	EPPK1	protein_coding	-10.246	3.21979e-08	1.26632e-05
ENST00000557184	ENSG00000100532	CGRRF1	protein_coding	-4.50692	3.24585e-08	1.26632e-05
ENST00000355105	ENSG00000159592	GPBP1L1	protein_coding	-8.39328	3.24927e-08	1.26632e-05
ENST00000508798	ENSG00000168785	TSPAN5	protein_coding	-9.10926	3.40157e-08	1.2754e-05
ENST00000255882	ENSG00000241973	PI4KA	protein_coding	-9.16788	3.87983e-08	1.3889e-05
ENST00000409010	ENSG00000115520	COQ10B	protein_coding	-9.61497	4.80977e-08	1.67014e-05
ENST00000406567	ENSG00000138073	PREB	protein_coding	-7.20935	5.75644e-08	1.94065e-05
ENST00000508500	ENSG00000160789	LMNA	protein_coding	-10.6963	6.78299e-08	2.222e-05
ENST00000441012	ENSG00000025434	NR1H3	protein_coding	-7.92573	1.06971e-07	3.28714e-05
ENST00000519597	ENSG00000186106	ANKRD46	protein_coding	-7.48312	1.3225e-07	3.95882e-05
ENST00000502732	ENSG00000143322	ABL2	protein_coding	-4.21694	1.57478e-07	4.48218e-05
ENST00000299084	ENSG00000166068	SPRED1	protein_coding	-9.78467	1.63557e-07	4.61737e-05
ENST00000465993	ENSG00000115289	PCGF1	protein_coding	-7.83362	1.83457e-07	5.09628e-05
ENST00000263265	ENSG00000105559	PLEKHA4	protein_coding	-10.9572	2.15952e-07	5.76825e-05
ENST00000294794	ENSG00000162745	OLFML2B	protein_coding	-7.92549	2.55154e-07	6.66162e-05
ENST00000620510	ENSG00000106261	ZKSCAN1	protein_coding	-7.77475	2.60583e-07	6.70259e-05
ENST00000392585	ENSG00000183484	GPR132	protein_coding	-8.65559	2.66111e-07	6.79034e-05
ENST00000566269	ENSG00000102854	MSLN	protein_coding	-11.6021	2.68301e-07	6.79034e-05
ENST00000536159	ENSG00000164442	CITED2	protein_coding	-8.35527	2.69861e-07	6.79034e-05
ENST00000334133	ENSG00000131378	RFTN1	protein_coding	-8.94593	3.01886e-07	7.38219e-05
ENST00000556255	ENSG00000100441	KHNYN	protein_coding	-12.9719	3.21289e-07	7.68862e-05
ENST00000404032	ENSG00000119777	TMEM214	protein_coding	-9.89531	3.80687e-07	8.81264e-05
ENST00000248901	ENSG00000100055	CYTH4	protein_coding	-10.615	3.94931e-07	9.08185e-05
ENST00000584350	ENSG00000196704	AMZ2	protein_coding	-10.2172	4.58449e-07	0.000102705
ENST00000367843	ENSG00000143164	DCAF6	protein_coding	-11.5862	5.27834e-07	0.000116003
ENST00000520427	ENSG00000213523	SRA1	protein_coding	-10.2594	6.06332e-07	0.00012838
ENST00000398473	ENSG00000161813	LARP4	protein_coding	-8.04862	7.33528e-07	0.000150442
ENST00000261534	ENSG00000009830	POMT2	protein_coding	-7.80901	7.36528e-07	0.000150442
ENST00000303277	ENSG00000168936	TMEM129	protein_coding	-9.65799	7.9134e-07	0.000159759
ENST00000570917	ENSG00000153066	TXNDC11	protein_coding	-18.9634	8.22927e-07	0.000165175
ENST00000319778	ENSG00000120616	EPC1	protein_coding	-6.82139	8.3555e-07	0.000166745
ENST00000351760	ENSG00000134330	IAH1	protein_coding	-7.46311	8.62405e-07	0.000171121
ENST00000333055	ENSG00000131446	MGAT1	protein_coding	-9.05213	8.78628e-07	0.000173199
ENST00000428120	ENSG00000162585	C1orf86	protein_coding	-8.14859	9.40052e-07	0.000181346
ENST00000457309	ENSG00000164924	YWHAZ	protein_coding	-9.6262	1.08881e-06	0.000204367
ENST00000373950	ENSG00000088367	EPB41L1	protein_coding	-8.26984	1.14202e-06	0.000212742
ENST00000369038	ENSG00000143382	ADAMTSL4	protein_coding	-15.8839	1.20389e-06	0.000222361
ENST00000430412	ENSG00000196950	SLC39A10	protein_coding	-10.1745	1.39919e-06	0.00024723
ENST00000246657	ENSG00000126353	CCR7	protein_coding	-8.88502	1.84481e-06	0.000310967
ENST00000588328	ENSG00000124299	PEPD	protein_coding	-8.80259	1.93756e-06	0.000325023
ENST00000567500	ENSG00000141076	CIRH1A	protein_coding	-9.30875	2.06981e-06	0.000343886
ENST00000322940	ENSG00000119328	FAM206A	protein_coding	-8.64401	2.18537e-06	0.000357948
ENST00000359013	ENSG00000163513	TGFBR2	protein_coding	-7.0268	2.28054e-06	0.000370044
ENST00000263856	ENSG00000115561	CHMP3	protein_coding	-9.57851	2.29784e-06	0.000371117
ENST00000415497	ENSG00000112576	CCND3	protein_coding	-4.1965	2.61389e-06	0.000412567
ENST00000579793	ENSG00000264343	NOTCH2NL	protein_coding	-8.45678	2.75242e-06	0.000428697
ENST00000378364	ENSG00000198931	APRT	protein_coding	-8.26845	2.75312e-06	0.000428697
ENST00000528651	ENSG00000175356	SCUBE2	protein_coding	-10.9935	2.87256e-06	0.000441583
ENST00000343028	ENSG00000064115	TM7SF3	protein_coding	-14.7378	2.87403e-06	0.000441583
ENST00000282869	ENSG00000152926	ZNF117	protein_coding	-10.8576	3.10338e-06	0.00046449
ENST00000451085	ENSG00000173114	LRRN3	protein_coding	-6.91844	3.31361e-06	0.000493758
ENST00000515604	ENSG00000272414	FAM47E-STBD1	protein_coding	-7.93019	3.33756e-06	0.000493758
ENST00000394566	ENSG00000172716	SLFN11	protein_coding	-10.7995	3.34158e-06	0.000493758
ENST00000562075	ENSG00000064666	CNN2	protein_coding	-8.65198	3.68387e-06	0.000535225
ENST00000292562	ENSG00000198169	ZNF251	protein_coding	-7.90622	3.77352e-06	0.000543701
ENST00000530003	ENSG00000117676	RPS6KA1	protein_coding	-9.62355	3.86824e-06	0.000555045
ENST00000395118	ENSG00000129009	ISLR	protein_coding	-7.27762	4.28657e-06	0.000607539
ENST00000446916	ENSG00000088812	ATRN	protein_coding	-9.38187	4.73258e-06	0.000659976
ENST00000405074	ENSG00000084764	MAPRE3	protein_coding	-8.20652	4.98513e-06	0.00068151
ENST00000397147	ENSG00000100365	NCF4	protein_coding	-7.93852	5.03128e-06	0.000685122
ENST00000436743	ENSG00000203747	FCGR3A	protein_coding	-12.665	5.2507e-06	0.000706074
ENST00000574671	ENSG00000184009	ACTG1	protein_coding	-14.208	5.26648e-06	0.000706074
ENST00000369486	ENSG00000143061	IGSF3	protein_coding	-7.11913	6.29052e-06	0.000824271
ENST00000373779	ENSG00000060656	PTPRU	protein_coding	-7.0046	6.32973e-06	0.000826292
ENST00000486234	ENSG00000115307	AUP1	protein_coding	-9.12593	6.51344e-06	0.000840791
ENST00000292357	ENSG00000187800	PEAR1	protein_coding	-6.1078	7.33384e-06	0.000922683
ENST00000318560	ENSG00000097007	ABL1	protein_coding	-7.97532	7.51372e-06	0.000935148
ENST00000562606	ENSG00000178802	MPI	protein_coding	-7.42855	7.92371e-06	0.000972236
ENST00000581161	ENSG00000176225	RTTN	protein_coding	-5.07898	8.09424e-06	0.000986191
ENST00000616577	ENSG00000133112	TPT1	protein_coding	-8.6189	8.21849e-06	0.000997828
ENST00000524677	ENSG00000146067	FAM193B	protein_coding	-6.72323	8.84001e-06	0.00106215
ENST00000308158	ENSG00000175309	PHYKPL	protein_coding	-7.49603	9.003e-06	0.0010743
ENST00000625284	ENSG00000198185	ZNF334	protein_coding	-5.94157	9.54945e-06	0.00113172
ENST00000450127	ENSG00000115539	PDCL3	protein_coding	-7.15788	9.76916e-06	0.00115382
ENST00000372725	ENSG00000156650	KAT6B	protein_coding	-7.23232	9.88133e-06	0.00115919
ENST00000367940	ENSG00000162745	OLFML2B	protein_coding	-4.99162	1.02873e-05	0.00120274
ENST00000393230	ENSG00000106459	NRF1	protein_coding	-9.38563	1.05847e-05	0.00122924
ENST00000377346	ENSG00000171608	PIK3CD	protein_coding	-1.24634	1.29733e-05	0.00147217
ENST00000622429	ENSG00000179361	ARID3B	protein_coding	-8.50228	1.30185e-05	0.00147249
ENST00000418924	ENSG00000100599	RIN3	protein_coding	-7.74605	1.36313e-05	0.00152688
ENST00000450168	ENSG00000166816	LDHD	protein_coding	-7.47378	1.39543e-05	0.00155305
ENST00000311234	ENSG00000102786	INTS6	protein_coding	-7.11978	1.54587e-05	0.00170409
ENST00000396330	ENSG00000104497	SNX16	protein_coding	-9.9387	1.65107e-05	0.00179723
ENST00000266269	ENSG00000100105	PATZ1	protein_coding	-8.41072	1.68262e-05	0.00182016
ENST00000263012	ENSG00000103226	NOMO3	protein_coding	-6.09324	1.73504e-05	0.00187104
ENST00000611957	ENSG00000167110	GOLGA2	protein_coding	-6.80553	1.78446e-05	0.00190073
ENST00000519487	ENSG00000154582	TCEB1	protein_coding	-8.20094	1.99251e-05	0.00205917
ENST00000545796	ENSG00000131196	NFATC1	protein_coding	-12.1062	2.15248e-05	0.00216716
ENST00000266304	ENSG00000167074	TEF	protein_coding	-7.5518	2.15318e-05	0.00216716
ENST00000480673	ENSG00000162613	FUBP1	protein_coding	-8.37072	2.21945e-05	0.00222099
ENST00000432329	ENSG00000118260	CREB1	protein_coding	-2.64097	2.27034e-05	0.00226538
ENST00000617871	ENSG00000010278	CD9	protein_coding	-6.75119	2.32597e-05	0.0023059
ENST00000510864	ENSG00000164306	PRIMPOL	protein_coding	-8.64081	2.35782e-05	0.00232594
ENST00000553774	ENSG00000125375	ATP5S	protein_coding	-5.49251	2.49053e-05	0.00243086
ENST00000267229	ENSG00000139746	RBM26	protein_coding	-10.9104	2.49219e-05	0.00243086
ENST00000361842	ENSG00000132530	XAF1	protein_coding	-10.5166	2.59024e-05	0.00251239
ENST00000289431	ENSG00000158480	SPATA2	protein_coding	-4.02806	2.61023e-05	0.00252225
ENST00000253934	ENSG00000131634	TMEM204	protein_coding	-7.43216	2.74826e-05	0.00262894
ENST00000605337	ENSG00000116221	MRPL37	protein_coding	-8.41623	2.87796e-05	0.00273793
ENST00000546020	ENSG00000178921	PFAS	protein_coding	-6.9144	2.9432e-05	0.00278473
ENST00000588385	ENSG00000105254	TBCB	protein_coding	-5.16809	3.1605e-05	0.00293381
ENST00000512148	ENSG00000205403	CFI	protein_coding	-8.53623	3.17e-05	0.00293381
ENST00000371083	ENSG00000079739	PGM1	protein_coding	-7.82612	3.1768e-05	0.00293381
ENST00000409857	ENSG00000005436	GCFC2	protein_coding	-6.20163	3.20278e-05	0.00294215
ENST00000379340	ENSG00000168255	POLR2J3	protein_coding	-11.6528	3.53805e-05	0.00319936
ENST00000278224	ENSG00000110619	CARS	protein_coding	-5.81556	3.71288e-05	0.00334006
ENST00000230914	ENSG00000112996	MRPS30	protein_coding	-12.817	3.75974e-05	0.00336477
ENST00000296783	ENSG00000164329	PAPD4	protein_coding	-5.82613	3.88195e-05	0.0034387
ENST00000544964	ENSG00000072110	ACTN1	protein_coding	-7.38528	3.93559e-05	0.00346852
ENST00000614500	ENSG00000116117	PARD3B	protein_coding	-8.74757	4.03479e-05	0.00353798
ENST00000421699	ENSG00000167110	GOLGA2	protein_coding	-6.32984	4.12709e-05	0.00360073
ENST00000257694	ENSG00000135241	PNPLA8	protein_coding	-9.72487	4.35621e-05	0.00378162
ENST00000401827	ENSG00000205268	PDE7A	protein_coding	-8.57929	4.40471e-05	0.00380377
ENST00000609923	ENSG00000122912	SLC25A16	protein_coding	-7.0043	4.54373e-05	0.00387108
ENST00000553708	ENSG00000100968	NFATC4	protein_coding	-8.73933	4.57965e-05	0.00388811
ENST00000485852	ENSG00000164904	ALDH7A1	protein_coding	-7.0105	4.72725e-05	0.0039939
ENST00000261654	ENSG00000111452	GPR133	protein_coding	-7.23542	4.77194e-05	0.00401212
ENST00000460236	ENSG00000129292	PHF20L1	protein_coding	-5.69669	4.93988e-05	0.0041433
ENST00000553325	ENSG00000126214	KLC1	protein_coding	-8.20986	5.05464e-05	0.00422933
ENST00000383177	ENSG00000166278	C2	protein_coding	-5.23805	5.08872e-05	0.00424762
ENST00000556184	ENSG00000100650	SRSF5	protein_coding	-7.06998	5.26036e-05	0.00434567
ENST00000264868	ENSG00000091490	SEL1L3	protein_coding	-10.313	5.26877e-05	0.00434567
ENST00000504114	ENSG00000244754	N4BP2L2	protein_coding	-7.87074	5.52098e-05	0.00445901
ENST00000460031	ENSG00000117385	P3H1	protein_coding	-1.37824	5.59532e-05	0.00449749
ENST00000447873	ENSG00000127990	SGCE	protein_coding	-7.79686	5.89624e-05	0.00469589
ENST00000514151	ENSG00000172869	DMXL1	protein_coding	-7.58156	5.92708e-05	0.00470704
ENST00000567607	ENSG00000140682	TGFB1I1	protein_coding	-10.4749	6.02461e-05	0.00475451
ENST00000219345	ENSG00000103066	PLA2G15	protein_coding	-10.2306	6.04207e-05	0.00475748
ENST00000545521	ENSG00000103495	MAZ	protein_coding	-7.38481	6.75883e-05	0.00518088
ENST00000372836	ENSG00000137161	CNPY3	protein_coding	-6.39681	6.87879e-05	0.00523814
ENST00000311601	ENSG00000174705	SH3PXD2B	protein_coding	-7.67949	7.07458e-05	0.00533734
ENST00000490035	ENSG00000185565	LSAMP	protein_coding	-7.83394	7.18166e-05	0.00538609
ENST00000394709	ENSG00000126803	HSPA2	protein_coding	-6.63793	7.50803e-05	0.00560664
ENST00000503731	ENSG00000104723	TUSC3	protein_coding	-6.20606	8.25124e-05	0.00605742
ENST00000275635	ENSG00000086730	LAT2	protein_coding	-6.70743	8.34216e-05	0.00611125
ENST00000327697	ENSG00000164068	RNF123	protein_coding	-6.02401	8.4352e-05	0.00615344
ENST00000379730	ENSG00000145703	IQGAP2	protein_coding	-4.70829	8.48263e-05	0.00615399
ENST00000300849	ENSG00000167394	ZNF668	protein_coding	-7.26669	8.48911e-05	0.00615399
ENST00000458595	ENSG00000120549	KIAA1217	protein_coding	-6.61635	8.52555e-05	0.00616752
ENST00000427177	ENSG00000184640	SEPT9	protein_coding	-9.34963	8.58588e-05	0.0061854
ENST00000305046	ENSG00000196616	ADH1B	protein_coding	-9.11195	8.64974e-05	0.0062185
ENST00000379802	ENSG00000096696	DSP	protein_coding	-5.09229	8.89865e-05	0.00634663
ENST00000439918	ENSG00000185624	P4HB	protein_coding	-8.92962	9.318e-05	0.00657639
ENST00000340020	ENSG00000186063	AIDA	protein_coding	-16.0652	9.44726e-05	0.00662721
ENST00000583848	ENSG00000072778	ACADVL	protein_coding	-4.47245	9.59249e-05	0.006702
ENST00000568865	ENSG00000064666	CNN2	protein_coding	-5.58754	9.99947e-05	0.00694443
ENST00000565316	ENSG00000188603	CLN3	protein_coding	-6.19965	0.000100599	0.00697246
ENST00000467229	ENSG00000137210	TMEM14B	protein_coding	-5.8467	0.000100957	0.00698335
ENST00000535698	ENSG00000060237	WNK1	protein_coding	-5.26863	0.000102009	0.0070421
ENST00000369047	ENSG00000143369	ECM1	protein_coding	-9.73016	0.000102936	0.0070779
ENST00000475061	ENSG00000083750	RRAGB	protein_coding	-6.88864	0.000105199	0.007205
ENST00000578758	ENSG00000108654	DDX5	protein_coding	-5.15345	0.000107879	0.00737397
ENST00000471232	ENSG00000115760	BIRC6	protein_coding	-10.3907	0.00010923	0.00743705
ENST00000344987	ENSG00000154889	MPPE1	protein_coding	-7.95218	0.0001104	0.00750203
ENST00000261789	ENSG00000100926	TM9SF1	protein_coding	-6.72068	0.0001143	0.00768126
ENST00000598962	ENSG00000105223	PLD3	protein_coding	-13.1488	0.000116684	0.0078068
ENST00000409644	ENSG00000167716	WDR81	protein_coding	-12.9072	0.000117373	0.00783782
ENST00000484266	ENSG00000100288	CHKB	protein_coding	-5.83316	0.000118153	0.00787477
ENST00000538028	ENSG00000103591	AAGAB	protein_coding	-5.57332	0.000119596	0.00794423
ENST00000452621	ENSG00000117625	RCOR3	protein_coding	-5.95427	0.000123412	0.00814705
ENST00000303068	ENSG00000135063	FAM189A2	protein_coding	-8.67992	0.000126661	0.00829844
ENST00000565092	ENSG00000103249	CLCN7	protein_coding	-6.37597	0.000127183	0.00831695
ENST00000589664	ENSG00000183077	AFMID	protein_coding	-3.76631	0.000130444	0.00851417
ENST00000296522	ENSG00000164120	HPGD	protein_coding	-8.1733	0.000133184	0.00866044
ENST00000375561	ENSG00000106809	OGN	protein_coding	-4.07012	0.000133672	0.00867593
ENST00000590994	ENSG00000249115	HAUS5	protein_coding	-8.79186	0.00013886	0.00896238
ENST00000622629	ENSG00000116062	MSH6	protein_coding	-6.10484	0.000141084	0.00908904
ENST00000467111	ENSG00000168961	LGALS9	protein_coding	-6.88543	0.000147096	0.00940656
ENST00000368086	ENSG00000162729	IGSF8	protein_coding	-7.06972	0.000148263	0.00944642
ENST00000482446	ENSG00000189050	RNFT1	protein_coding	-6.7452	0.000148814	0.00945549
ENST00000560468	ENSG00000182718	ANXA2	protein_coding	-9.21654	0.000149223	0.00945549
ENST00000484697	ENSG00000117480	FAAH	protein_coding	-8.3252	0.000149761	0.00945602
ENST00000336126	ENSG00000180628	PCGF5	protein_coding	-14.6417	0.000150941	0.0095123
ENST00000460472	ENSG00000155657	TTN	protein_coding	-7.53178	0.000152123	0.00956945
ENST00000327374	ENSG00000183597	TANGO2	protein_coding	-9.74536	0.000153531	0.0096405
ENST00000370345	ENSG00000075826	SEC31B	protein_coding	-7.86772	0.000154088	0.00964063
ENST00000308595	ENSG00000173020	ADRBK1	protein_coding	-9.76265	0.000156338	0.00974598
ENST00000409036	ENSG00000091428	RAPGEF4	protein_coding	-8.03266	0.000157236	0.00976719
ENST00000585281	ENSG00000265190	ANXA8	protein_coding	-4.94801	0.000158165	0.00978986
ENST00000427012	ENSG00000183337	BCOR	protein_coding	-6.22523	0.00016682	0.0103072
ENST00000354546	ENSG00000197043	ANXA6	protein_coding	-10.2645	0.000168595	0.0103616
ENST00000216274	ENSG00000129465	RIPK3	protein_coding	-4.94504	0.000189176	0.0113847
ENST00000539496	ENSG00000003096	KLHL13	protein_coding	-8.78466	0.000189569	0.0113885
ENST00000321955	ENSG00000077616	NAALAD2	protein_coding	-5.73266	0.000205652	0.0121471
ENST00000325144	ENSG00000181472	ZBTB2	protein_coding	-2.70402	0.000209082	0.0123053
ENST00000292303	ENSG00000160791	CCR5	protein_coding	-5.49632	0.000213859	0.0125228
ENST00000610563	ENSG00000188811	NHLRC3	protein_coding	-7.15047	0.000218263	0.0127164
ENST00000475430	ENSG00000186310	NAP1L3	protein_coding	-4.92358	0.000225751	0.012957
ENST00000557609	ENSG00000100600	LGMN	protein_coding	-8.86665	0.000227099	0.0129914
ENST00000433983	ENSG00000140374	ETFA	protein_coding	-6.09633	0.000232674	0.0132885
ENST00000393910	ENSG00000141698	NT5C3B	protein_coding	-6.07168	0.00025008	0.0140698
ENST00000370558	ENSG00000097033	SH3GLB1	protein_coding	-8.27918	0.000250407	0.0140698
ENST00000304552	ENSG00000172215	CXCR6	protein_coding	-5.30594	0.000251806	0.0141255
ENST00000247291	ENSG00000126878	AIF1L	protein_coding	-7.4344	0.000255795	0.0143031
ENST00000238875	ENSG00000119862	LGALSL	protein_coding	-3.2303	0.000264719	0.0147073
ENST00000520470	ENSG00000188938	FAM120AOS	protein_coding	-4.73641	0.00026628	0.0147705
ENST00000367483	ENSG00000116690	PRG4	protein_coding	-8.67737	0.000271013	0.0149613
ENST00000327237	ENSG00000140688	C16orf58	protein_coding	-12.741	0.0002729	0.0150177
ENST00000236937	ENSG00000072694	FCGR2B	protein_coding	-5.25027	0.000275043	0.0150679
ENST00000377991	ENSG00000137103	TMEM8B	protein_coding	-7.3545	0.000275114	0.0150679
ENST00000333202	ENSG00000184277	TM2D3	protein_coding	-5.70938	0.000291047	0.0158655
ENST00000463574	ENSG00000234745	HLA-B	protein_coding	-4.70618	0.00029269	0.01593
ENST00000372106	ENSG00000101888	NXT2	protein_coding	-6.46527	0.000294941	0.0159908
ENST00000444201	ENSG00000187210	GCNT1	protein_coding	-6.44314	0.000305563	0.016404
ENST00000360814	ENSG00000120820	GLT8D2	protein_coding	-6.52456	0.00030557	0.016404
ENST00000550333	ENSG00000133641	C12orf29	protein_coding	-6.60285	0.000309586	0.0165386
ENST00000310054	ENSG00000167600	CYP2S1	protein_coding	-3.83024	0.000327412	0.0171998
ENST00000381846	ENSG00000121897	LIAS	protein_coding	-6.8923	0.000332819	0.0173938
ENST00000551812	ENSG00000076108	BAZ2A	protein_coding	-5.29822	0.000337001	0.0175442
ENST00000426925	ENSG00000131370	SH3BP5	protein_coding	-4.8876	0.000342097	0.0177563
ENST00000369478	ENSG00000116824	CD2	protein_coding	-6.2725	0.000353122	0.0182547
ENST00000453527	ENSG00000164733	CTSB	protein_coding	-6.88828	0.000353276	0.0182547
ENST00000452106	ENSG00000100395	L3MBTL2	protein_coding	-5.41525	0.000368595	0.0189335
ENST00000417220	ENSG00000041880	PARP3	protein_coding	-5.82118	0.000373653	0.0191368
ENST00000310496	ENSG00000169733	RFNG	protein_coding	-12.6997	0.00038152	0.0193838
ENST00000474864	ENSG00000137404	NRM	protein_coding	-5.98084	0.000381825	0.0193838
ENST00000287878	ENSG00000106617	PRKAG2	protein_coding	-8.71882	0.000383704	0.0194507
ENST00000261368	ENSG00000064692	SNCAIP	protein_coding	-6.85433	0.000397337	0.0200374
ENST00000381707	ENSG00000184923	NUTM2A	protein_coding	-5.02685	0.000404909	0.020347
ENST00000378858	ENSG00000125872	LRRN4	protein_coding	-4.10228	0.000405488	0.020347
ENST00000445964	ENSG00000168918	INPP5D	protein_coding	-4.4358	0.000406852	0.0203566
ENST00000612719	ENSG00000251247	ZNF345	protein_coding	-6.38283	0.000411346	0.0205224
ENST00000470705	ENSG00000132681	ATP1A4	protein_coding	-5.49505	0.000427203	0.0211451
ENST00000552049	ENSG00000161835	GRASP	protein_coding	-8.19354	0.000427639	0.0211451
ENST00000590869	ENSG00000129351	ILF3	protein_coding	-5.42517	0.000428245	0.0211451
ENST00000287916	ENSG00000157224	CLDN12	protein_coding	-4.96289	0.000429205	0.0211451
ENST00000393080	ENSG00000196136	SERPINA3	protein_coding	-6.60593	0.000429307	0.0211451
ENST00000358813	ENSG00000115009	CCL20	protein_coding	-5.81991	0.000436045	0.0214161
ENST00000263864	ENSG00000118640	VAMP8	protein_coding	-6.71189	0.000453805	0.0220547
ENST00000617869	ENSG00000155100	OTUD6B	protein_coding	-7.53608	0.000458608	0.0222412
ENST00000215790	ENSG00000099992	TBC1D10A	protein_coding	-6.33084	0.000460595	0.0222753
ENST00000256969	ENSG00000134548	SPX	protein_coding	-4.97411	0.0004735	0.0227616
ENST00000534326	ENSG00000137216	TMEM63B	protein_coding	-6.53764	0.000473927	0.0227616
ENST00000452392	ENSG00000250264	XXbac-BPG246D15.9	protein_coding	-3.45005	0.000485317	0.0232123
ENST00000373383	ENSG00000094841	UPRT	protein_coding	-3.59492	0.000491878	0.0234198
ENST00000542278	ENSG00000165195	PIGA	protein_coding	-7.99116	0.000492352	0.0234198
ENST00000475833	ENSG00000124253	PCK1	protein_coding	-5.28536	0.000501952	0.0237463
ENST00000340736	ENSG00000072071	LPHN1	protein_coding	-4.33945	0.000514746	0.0242854
ENST00000344980	ENSG00000197647	ZNF433	protein_coding	-7.31539	0.000519913	0.0244959
ENST00000389447	ENSG00000172775	FAM192A	protein_coding	-8.32821	0.000528968	0.0248214
ENST00000597512	ENSG00000130475	FCHO1	protein_coding	-10.0728	0.000558942	0.0259822
ENST00000367309	ENSG00000174307	PHLDA3	protein_coding	-5.90399	0.000568875	0.0263238
ENST00000554980	ENSG00000119699	TGFB3	protein_coding	-3.58431	0.000581669	0.0267522
ENST00000201031	ENSG00000087510	TFAP2C	protein_coding	-4.09563	0.000593264	0.0271698
ENST00000433667	ENSG00000122515	ZMIZ2	protein_coding	-5.78557	0.000593879	0.0271698
ENST00000407997	ENSG00000239713	APOBEC3G	protein_coding	-4.91826	0.000601678	0.0274542
ENST00000394235	ENSG00000109381	ELF2	protein_coding	-5.27612	0.00060524	0.0275444
ENST00000508579	ENSG00000153113	CAST	protein_coding	-4.94989	0.000620738	0.0279929
ENST00000271324	ENSG00000143119	CD53	protein_coding	-4.9327	0.000624057	0.0281061
ENST00000368804	ENSG00000159450	TCHH	protein_coding	-4.06649	0.000626195	0.0281294
ENST00000360957	ENSG00000104881	PPP1R13L	protein_coding	-6.03201	0.00063337	0.0283052
ENST00000559608	ENSG00000140332	TLE3	protein_coding	-5.95189	0.000641439	0.028629
ENST00000381039	ENSG00000122257	RBBP6	protein_coding	-7.64506	0.000662484	0.0294547
ENST00000282701	ENSG00000152785	BMP3	protein_coding	-4.67776	0.000666481	0.0295945
ENST00000589454	ENSG00000130811	EIF3G	protein_coding	-10.6371	0.000688792	0.0304296
ENST00000259470	ENSG00000136943	CTSV	protein_coding	-5.12806	0.000692812	0.0305405
ENST00000306999	ENSG00000106524	ANKMY2	protein_coding	-6.74822	0.00069442	0.0305405
ENST00000445930	ENSG00000100519	PSMC6	protein_coding	-11.001	0.000694711	0.0305405
ENST00000493306	ENSG00000136826	KLF4	protein_coding	-5.84325	0.000716648	0.0312232
ENST00000317677	ENSG00000214078	CPNE1	protein_coding	-3.65966	0.000719499	0.0313081
ENST00000541903	ENSG00000141252	VPS53	protein_coding	-6.15016	0.000721284	0.0313403
ENST00000527481	ENSG00000105397	TYK2	protein_coding	-5.99537	0.000722044	0.0313403
ENST00000542580	ENSG00000172037	LAMB2	protein_coding	-4.27148	0.000730682	0.0316361
ENST00000427123	ENSG00000115234	SNX17	protein_coding	-5.12455	0.000734203	0.031749
ENST00000548033	ENSG00000004455	AK2	protein_coding	-9.09675	0.000737655	0.031819
ENST00000438792	ENSG00000126777	KTN1	protein_coding	-10.2405	0.000741231	0.0319045
ENST00000500704	ENSG00000123552	USP45	protein_coding	-5.00148	0.00074848	0.0321661
ENST00000618804	ENSG00000148541	FAM13C	protein_coding	-8.5632	0.000750618	0.0322029
ENST00000368013	ENSG00000186517	ARHGAP30	protein_coding	-5.41834	0.000758101	0.0324191
ENST00000602153	ENSG00000105193	RPS16	protein_coding	-5.23449	0.000770337	0.0328614
ENST00000558018	ENSG00000140545	MFGE8	protein_coding	-5.79583	0.000796896	0.0338451
ENST00000430334	ENSG00000225190	PLEKHM1	protein_coding	-5.87734	0.00079796	0.0338451
ENST00000618940	ENSG00000006125	AP2B1	protein_coding	-4.86275	0.00079827	0.0338451
ENST00000356284	ENSG00000112562	SMOC2	protein_coding	-3.48769	0.000802331	0.0339758
ENST00000527898	ENSG00000019144	PHLDB1	protein_coding	-7.33536	0.000804266	0.0340162
ENST00000380605	ENSG00000088882	CPXM1	protein_coding	-6.64301	0.000810066	0.0341783
ENST00000547568	ENSG00000011465	DCN	protein_coding	-7.27394	0.000824193	0.0347321
ENST00000236412	ENSG00000117751	PPP1R8	protein_coding	-7.79144	0.000828899	0.0348881
ENST00000569566	ENSG00000102854	MSLN	protein_coding	-5.41549	0.000844675	0.0354233
ENST00000319331	ENSG00000175928	LRRN1	protein_coding	-3.87126	0.000856543	0.0358777
ENST00000472059	ENSG00000072210	ALDH3A2	protein_coding	-5.09919	0.000874024	0.0364183
ENST00000402291	ENSG00000162929	KIAA1841	protein_coding	-6.20233	0.000883472	0.0366612
ENST00000605660	ENSG00000196422	PPP1R26	protein_coding	-4.83079	0.00088517	0.0366786
ENST00000286096	ENSG00000155666	KDM8	protein_coding	-7.07101	0.000896071	0.0368663
ENST00000555698	ENSG00000129538	RNASE1	protein_coding	-3.41573	0.00089769	0.0368892
ENST00000477601	ENSG00000144802	NFKBIZ	protein_coding	-4.21534	0.00090456	0.0370838
ENST00000599857	ENSG00000062822	POLD1	protein_coding	-7.85958	0.00092656	0.0377185
ENST00000392587	ENSG00000112290	WASF1	protein_coding	-9.98266	0.000948704	0.0383502
ENST00000509606	ENSG00000133835	HSD17B4	protein_coding	-6.66184	0.000950528	0.0383792
ENST00000372230	ENSG00000080189	SLC35C2	protein_coding	-8.11087	0.000969231	0.0389984
ENST00000561736	ENSG00000172236	TPSAB1	protein_coding	-5.5617	0.00098857	0.0396221
ENST00000347055	ENSG00000172086	KRCC1	protein_coding	-5.27602	0.000989296	0.0396221
ENST00000442215	ENSG00000163832	ELP6	protein_coding	-5.01057	0.00101777	0.0406218
ENST00000347587	ENSG00000128918	ALDH1A2	protein_coding	-6.60263	0.00102707	0.0409003
ENST00000575318	ENSG00000120071	KANSL1	protein_coding	-2.76908	0.00102914	0.0409254
ENST00000297195	ENSG00000164638	SLC29A4	protein_coding	-7.17191	0.00103638	0.0410343
ENST00000547997	ENSG00000028203	VEZT	protein_coding	-5.49121	0.0010596	0.0418586
ENST00000285381	ENSG00000164879	CA3	protein_coding	-6.36983	0.00108964	0.0429475
ENST00000434821	ENSG00000115170	ACVR1	protein_coding	-6.26399	0.00109476	0.0431002
ENST00000411828	ENSG00000183527	PSMG1	protein_coding	-6.13869	0.00110026	0.0432679
ENST00000583590	ENSG00000198231	DDX42	protein_coding	-7.72135	0.00111029	0.0435878
ENST00000379573	ENSG00000125843	AP5S1	protein_coding	-6.78513	0.00111265	0.0436069
ENST00000412309	ENSG00000110077	MS4A6A	protein_coding	-6.02975	0.00115529	0.045058
ENST00000263636	ENSG00000054219	LY75	protein_coding	-6.18365	0.001162	0.0452328
ENST00000409780	ENSG00000153208	MERTK	protein_coding	-8.96707	0.00116325	0.0452328
ENST00000438257	ENSG00000211448	DIO2	protein_coding	-10.0564	0.00116582	0.0452816
ENST00000543355	ENSG00000167272	POP5	protein_coding	-4.29083	0.00118352	0.0458667
ENST00000370466	ENSG00000162645	GBP2	protein_coding	-6.02951	0.00119979	0.0461878
ENST00000470588	ENSG00000082014	SMARCD3	protein_coding	-4.0908	0.00121777	0.046828
ENST00000377967	ENSG00000147050	KDM6A	protein_coding	-4.22741	0.00123247	0.0472366
ENST00000320895	ENSG00000049656	CLPTM1L	protein_coding	-7.72752	0.00123852	0.047375
ENST00000555365	ENSG00000100445	SDR39U1	protein_coding	-5.94625	0.00124048	0.047375
ENST00000397910	ENSG00000181143	MUC16	protein_coding	-4.03315	0.00124844	0.0475861
ENST00000396231	ENSG00000186976	EFCAB6	protein_coding	-5.46567	0.00125174	0.0476594
ENST00000622299	ENSG00000214087	ARL16	protein_coding	-7.56875	0.00128429	0.0486321
ENST00000404760	ENSG00000100425	BRD1	protein_coding	-14.1479	0.00130556	0.0492765
ENST00000613549	ENSG00000272636	DOC2B	protein_coding	-4.46575	0.00130798	0.0493139
ENST00000308344	ENSG00000106404	CLDN15	protein_coding	-5.49348	0.00132409	0.0497593

## Sheet:  ObCRC_NwCRC
Supplemental Data 4:GO and KEGG pathway enrichment analysis of DET in the diﬀerent comparisons
TranscriptRecID	EnsG	GeneSymbol	GeneType	logFC	PValue	FDR		Category	Term	Count	%	PValue	FDR	Genes
ENST00000433129	ENSG00000064687	ABCA7	protein_coding	11.1751	2.75935e-07	7.85375e-05		GOTERM_BP_DIRECT	GO:0098609~cell-cell adhesion	19	4.48113	3.78069e-05	0.0012096	CAST, YWHAZ, MYO6, STK24, TBC1D10A, PDLIM5, KTN1, TXNDC9, RAB1A, TMEM2, ATXN2L, EPB41L1, SH3GLB1, IST1, USO1, NDRG1, CC2D1A, EHD1, SEPT9
ENST00000435683	ENSG00000064687	ABCA7	protein_coding	-5.08835	0.000295065	0.0163103		GOTERM_BP_DIRECT	GO:0002479~antigen processing and presentation of exogenous peptide antigen via MHC class I, TAP-dependent	7	1.65094	0.00269954	0.0263156	PSMF1, ITGAV, PSMB3, HLA-A, HLA-B, PSMA7, HLA-F
ENST00000269080	ENSG00000141338	ABCA8	protein_coding	13.741	1.88646e-07	5.79693e-05		GOTERM_BP_DIRECT	GO:1904491~protein localization to ciliary transition zone	3	0.707547	0.00286646	0.0263156	CC2D2A, TCTN1, C5ORF42
ENST00000515655	ENSG00000118777	ABCG2	protein_coding	10.2062	5.18551e-05	0.00425677		GOTERM_BP_DIRECT	GO:0030198~extracellular matrix organization	12	2.83019	0.00447741	0.0263156	DDR1, CD47, LAMA4, ITGAV, ADAMTSL4, ICAM2, NF1, NID2, SPARC, ITGB1, GFOD2, ERCC2
ENST00000318560	ENSG00000097007	ABL1	protein_coding	9.13157	3.15416e-05	0.00283743		GOTERM_BP_DIRECT	GO:0046777~protein autophosphorylation	11	2.59434	0.00516698	0.0263156	STK16, NTRK3, DDR1, STK24, CAMK2D, WNK1, MKNK1, MINK1, PRKACA, ABL1, SIK2
ENST00000232744	ENSG00000114626	ABTB1	protein_coding	8.73003	2.60343e-05	0.0024473		GOTERM_BP_DIRECT	GO:0006470~protein dephosphorylation	9	2.12264	0.00712712	0.0263156	PTPRK, TNS2, SSH1, PPP2R5D, CYCS, DUSP22, PTPRU, PPP1CC, DLG1
ENST00000281182	ENSG00000151498	ACAD8	protein_coding	5.82864	0.000400098	0.0208269		GOTERM_BP_DIRECT	GO:0043547~positive regulation of GTPase activity	23	5.42453	0.00799519	0.0263156	LAMTOR5, CYTH1, NF1, SIPA1L2, DOCK8, OCRL, ARHGAP24, RIC8B, ITGB1, LLGL2, RASAL2, P2RY12, RASGRF2, CAMK2D, RABGEF1, CALM3, GNAS, DENND4A, PLCB1, BCAS3, KALRN, RIN3, ARHGAP10
ENST00000272065	ENSG00000143727	ACP1	protein_coding	11.1427	2.09627e-07	6.27507e-05		GOTERM_BP_DIRECT	GO:0060314~regulation of ryanodine-sensitive calcium-release channel activity	4	0.943396	0.00808844	0.0263156	CAMK2D, CALM3, PRKACA, ASPH
ENST00000574671	ENSG00000184009	ACTG1	protein_coding	8.6906	5.02689e-06	0.000709568		GOTERM_BP_DIRECT	GO:0010881~regulation of cardiac muscle contraction by regulation of the release of sequestered calcium ion	4	0.943396	0.00808844	0.0263156	CAMK2D, CALM3, PRKACA, ASPH
ENST00000476854	ENSG00000243989	ACY1	protein_coding	11.9664	7.66617e-07	0.000181448		GOTERM_BP_DIRECT	GO:0090630~activation of GTPase activity	7	1.65094	0.00822363	0.0263156	NTRK3, RALGAPA1, TBC1D10A, BCAS3, TAX1BP3, AKT2, TBC1D9B
ENST00000369038	ENSG00000143382	ADAMTSL4	protein_coding	8.95372	0.000550351	0.026954		GOTERM_BP_DIRECT	GO:0001561~fatty acid alpha-oxidation	3	0.707547	0.00959809	0.0279217	SLC27A2, PHYH, ALDH3A2
ENST00000473512	ENSG00000133597	ADCK2	protein_coding	5.07706	0.0010943	0.0452176		GOTERM_BP_DIRECT	GO:0090316~positive regulation of intracellular protein transport	4	0.943396	0.0122394	0.0326383	OAZ2, ASPH, BCAS3, TPR
ENST00000609540	ENSG00000170222	ADPRM	protein_coding	-11.7329	2.16394e-11	3.41549e-08		GOTERM_BP_DIRECT	GO:0030155~regulation of cell adhesion	5	1.17925	0.0149512	0.03652	LAMA4, EMCN, CYTH1, PKD1, ABL1
ENST00000265343	ENSG00000072364	AFF4	protein_coding	5.3931	0.000576163	0.0278136		GOTERM_BP_DIRECT	GO:0002480~antigen processing and presentation of exogenous peptide antigen via MHC class I, TAP-independent	3	0.707547	0.0159775	0.03652	HLA-A, HLA-B, HLA-F
ENST00000340020	ENSG00000186063	AIDA	protein_coding	7.38013	0.000767249	0.0343324		GOTERM_BP_DIRECT	GO:0001952~regulation of cell-matrix adhesion	3	0.707547	0.0196815	0.0390474	DDR1, NF1, MINK1
ENST00000247291	ENSG00000126878	AIF1L	protein_coding	7.48319	0.000742601	0.0334593		GOTERM_BP_DIRECT	GO:0016192~vesicle-mediated transport	9	2.12264	0.0203647	0.0390474	TRAPPC12, VAMP8, AP3M1, CYTH1, STX16, JAGN1, BCAS3, RAB1A, KALRN
ENST00000548033	ENSG00000004455	AK2	protein_coding	15.6083	2.97413e-09	2.15154e-06		GOTERM_BP_DIRECT	GO:0060333~interferon-gamma-mediated signaling pathway	6	1.41509	0.0207439	0.0390474	HLA-A, CAMK2D, HLA-DRB5, HLA-B, GBP2, HLA-F
ENST00000486368	ENSG00000105221	AKT2	protein_coding	31.4731	1.71985e-09	1.42191e-06		GOTERM_BP_DIRECT	GO:0030334~regulation of cell migration	6	1.41509	0.0243347	0.0427202	SGK1, LAMA4, ENPP2, LMNA, MINK1, AKT2
ENST00000573947	ENSG00000072210	ALDH3A2	protein_coding	10.6159	5.34855e-06	0.000739932		GOTERM_BP_DIRECT	GO:0006468~protein phosphorylation	18	4.24528	0.0263545	0.0427202	FASTKD1, SGK1, STK24, PRKAG2, WNK1, RPS6KB2, PKN1, MINK1, MKNK1, ILF3, CDK7, ADCK2, CAMK2D, PRKACA, CDK11B, SIK2, KALRN, ERCC2
ENST00000614444	ENSG00000086848	ALG9	protein_coding	6.8543	0.000652943	0.0302708		GOTERM_BP_DIRECT	GO:0036066~protein O-linked fucosylation	3	0.707547	0.0280351	0.0427202	SLC35C2, ADAMTSL4, POFUT2
ENST00000423048	ENSG00000116127	ALMS1	protein_coding	9.61565	1.01645e-05	0.00120461		GOTERM_BP_DIRECT	GO:0040015~negative regulation of multicellular organism growth	3	0.707547	0.0280351	0.0427202	LGMN, ALMS1, GNAS
ENST00000355264	ENSG00000185009	AP3M1	protein_coding	-6.20902	7.09106e-05	0.00536449		GOTERM_BP_DIRECT	GO:0016045~detection of bacterium	3	0.707547	0.0326534	0.0427224	HLA-A, HLA-DRB5, HLA-B
ENST00000379573	ENSG00000125843	AP5S1	protein_coding	16.2914	3.80456e-07	0.000102662		GOTERM_BP_DIRECT	GO:0042994~cytoplasmic sequestering of transcription factor	3	0.707547	0.0326534	0.0427224	MDFI, THRA, PKD1
ENST00000423585	ENSG00000154856	APCDD1	protein_coding	-6.50531	1.39412e-05	0.00148952		GOTERM_BP_DIRECT	GO:0001558~regulation of cell growth	6	1.41509	0.0326587	0.0427224	DDR1, SGK1, WISP2, EPB41L1, CAMK2D, CDK11B
ENST00000409652	ENSG00000221963	APOL6	protein_coding	6.17089	5.51021e-05	0.00446006		GOTERM_BP_DIRECT	GO:0000086~G2/M transition of mitotic cell cycle	8	1.88679	0.0333769	0.0427224	CALM3, ALMS1, PRKACA, ODF2, CEP164, CDK7, PLCB1, DCTN3
ENST00000395528	ENSG00000172901	AQPEP	protein_coding	11.1291	2.02991e-07	6.18304e-05		GOTERM_BP_DIRECT	GO:0016032~viral process	13	3.06604	0.0358448	0.0441166	NUP98, POLR2E, CREBBP, HLA-A, HLA-B, PSMA7, DDX11, KLC1, MDFIC, PSMB3, TPR, ERCC2, DLG1
ENST00000507661	ENSG00000071205	ARHGAP10	protein_coding	12.024	3.12017e-08	1.4028e-05		GOTERM_BP_DIRECT	GO:0030207~chondroitin sulfate catabolic process	3	0.707547	0.0375459	0.0444988	IDS, CSPG5, IDUA
ENST00000395183	ENSG00000138639	ARHGAP24	protein_coding	3.85404	0.00107474	0.0445339		GOTERM_BP_DIRECT	GO:0001822~kidney development	6	1.41509	0.0425659	0.045351	TNS2, BAG6, SERPINF1, PKD1, C5ORF42, TET2
ENST00000355431	ENSG00000032219	ARID4A	protein_coding	40.5227	1.16174e-11	2.09653e-08		GOTERM_BP_DIRECT	GO:0046037~GMP metabolic process	3	0.707547	0.0426982	0.045351	GMPR2, GUK1, DLG1
ENST00000622299	ENSG00000214087	ARL16	protein_coding	9.18331	1.08904e-05	0.00126475		GOTERM_BP_DIRECT	GO:0097089~methyl-branched fatty acid metabolic process	2	0.471698	0.0439338	0.045351	SLC27A2, PHYH
ENST00000268314	ENSG00000140691	ARMC5	protein_coding	12.3105	5.42225e-08	2.11553e-05		GOTERM_BP_DIRECT	GO:0051046~regulation of secretion	2	0.471698	0.0439338	0.045351	MYO6, POFUT2
ENST00000519234	ENSG00000198363	ASPH	protein_coding	10.4591	7.72915e-07	0.000181448		GOTERM_BP_DIRECT	GO:0001736~establishment of planar polarity	3	0.707547	0.0480965	0.0480965	ALMS1, C5ORF42, FZD6
ENST00000429957	ENSG00000197785	ATAD3A	protein_coding	5.43692	0.00100797	0.0424249
ENST00000247178	ENSG00000126775	ATG14	protein_coding	8.30787	3.89795e-05	0.00338381		Category	Term	Count	%	PValue	FDR	Genes
ENST00000590665	ENSG00000152234	ATP5A1	protein_coding	-12.7839	3.54338e-07	9.84324e-05		GOTERM_MF_DIRECT	GO:0098641~cadherin binding involved in cell-cell adhesion	21	4.95283	6.92181e-06	9.688e-05	CAST, YWHAZ, MYO6, STK24, TBC1D10A, PDLIM5, KTN1, TXNDC9, ITGB1, RAB1A, TMEM2, ATXN2L, EPB41L1, SH3GLB1, IST1, USO1, NDRG1, CC2D1A, EHD1, SEPT9, DLG1
ENST00000392541	ENSG00000154518	ATP5G3	protein_coding	7.05666	0.000655091	0.0303298		GOTERM_MF_DIRECT	GO:0005515~protein binding	233	54.9528	2.42773e-05	0.0001701	CHMP3, RPL13, PDLIM5, RSRP1, PPP2R5D, USE1, SELENBP1, ERLEC1, RAB1A, ACTG1, CD47, DDX11, RPLP0, CFI, JAGN1, TBC1D9B, PTPRK, OPA1, RCOR3, RPUSD3, WNK1, TXNDC9, PTPRU, DCTN3, TRAPPC12, LETM1, RPS16, DCAF8, SERPINF1, TRAPPC5, TGFB1I1, SCAF8, MRPL43, RBP4, NFKBIB, WDR60, CEP164, OCRL, ACP1, STX16, FCHO1, LAMTOR5, MDFI, S100A16, SPHK2, CREBBP, ALMS1, TAX1BP3, ECM1, ABCG2, NTRK3, SYNE1, LAMA4, HSPA12B,…
ENST00000589970	ENSG00000105341	ATP5SL	protein_coding	46.406	3.15049e-11	4.75642e-08		GOTERM_MF_DIRECT	GO:0017137~Rab GTPase binding	10	2.35849	0.00284577	0.0101129	AP3M1, TBC1D10A, RPH3AL, RABGEF1, ODF2, NDRG1, EHD1, LLGL2, TBC1D9B, RIN3
ENST00000264449	ENSG00000124406	ATP8A1	protein_coding	9.1154	1.77295e-05	0.0018007		GOTERM_MF_DIRECT	GO:0005524~ATP binding	50	11.7925	0.00304745	0.0101129	CLPB, PRKAG2, RPS6KB2, TTN, ACTG1, ATAD3A, MCM8, ADCK2, DDX11, PRKACA, SIK2, AKT2, SGK1, MYO6, PFKL, STK24, WNK1, NDUFA13, PKN1, MINK1, CDK7, MCM3, TIMM44, DDR1, PNPLA8, CDK11B, SLC27A2, CBWD5, KALRN, ABCA8, STK16, ABCA7, MKNK1, UBE2D3, HSPA2, CAMK2D, EHD1, ERCC2, SPHK2, GARS, AK2, ABCG2, NTRK3, HSPA12B, MYO19, ATP5A1, ABL1, GUK1, CLCN7, ATP8A1
ENST00000446916	ENSG00000088812	ATRN	protein_coding	10.0859	6.59253e-06	0.000867117		GOTERM_MF_DIRECT	GO:0005096~GTPase activator activity	15	3.53774	0.00361175	0.0101129	TBC1D10A, NF1, SIPA1L2, OCRL, ARHGAP24, RIC8B, LLGL2, RASAL2, ELMOD3, RALGAPA1, PLCB1, ARHGAP10, TBC1D9B, RIN3, KALRN
ENST00000564304	ENSG00000168488	ATXN2L	protein_coding	-3.65444	0.000452307	0.0229955		GOTERM_MF_DIRECT	GO:0004672~protein kinase activity	17	4.00943	0.00608875	0.0142071	STK16, FASTKD1, STK24, WNK1, RPS6KB2, PKN1, MINK1, MKNK1, CDK7, TTN, DDR1, ADCK2, CDK11B, ABL1, AKT2, ERCC2, KALRN
ENST00000375964	ENSG00000204463	BAG6	protein_coding	13.722	8.06658e-08	2.88767e-05		GOTERM_MF_DIRECT	GO:0004674~protein serine/threonine kinase activity	17	4.00943	0.00926805	0.0185361	STK16, SGK1, STK24, WNK1, RPS6KB2, PKN1, MINK1, MKNK1, CDK7, TTN, ADCK2, CAMK2D, CDK11B, PRKACA, SIK2, AKT2, KALRN
ENST00000408905	ENSG00000141376	BCAS3	protein_coding	-1.21664	0.000104465	0.00714066		GOTERM_MF_DIRECT	GO:0003954~NADH dehydrogenase activity	3	0.707547	0.0123561	0.0216232	NDUFV1, NDUFA13, NDUFS3
ENST00000404760	ENSG00000100425	BRD1	protein_coding	13.5333	2.3012e-09	1.7371e-06		GOTERM_MF_DIRECT	GO:0042605~peptide antigen binding	4	0.943396	0.0229712	0.035733	HLA-A, HLA-DRB5, HLA-B, HLA-F
ENST00000327705	ENSG00000165810	BTNL9	protein_coding	9.85357	2.66356e-06	0.000455614		GOTERM_MF_DIRECT	GO:0044325~ion channel binding	7	1.65094	0.0385512	0.0490937	FXYD1, FHL1, CAMK2D, PKD1, CALM3, ASPH, DLG1
ENST00000431419	ENSG00000106245	BUD31	protein_coding	4.60077	0.000529796	0.0261316		GOTERM_MF_DIRECT	GO:0005521~lamin binding	3	0.707547	0.0418812	0.0490937	SYNE1, PLCB1, PPP1CC
ENST00000343736	ENSG00000005379	BZRAP1	protein_coding	9.32758	9.89395e-06	0.00118468		GOTERM_MF_DIRECT	GO:0000166~nucleotide binding	14	3.30189	0.0447542	0.0490937	RALY, RBM24, RBM23, MOCS2, RBM41, NT5C3B, RBM7, RBPMS, EIF3B, NT5M, CIRBP, RBM39, SCAF8, NELFE
ENST00000550333	ENSG00000133641	C12orf29	protein_coding	7.17402	8.8819e-05	0.00630706		GOTERM_MF_DIRECT	GO:0005085~guanyl-nucleotide exchange factor activity	7	1.65094	0.0459914	0.0490937	LAMTOR5, P2RY12, RASGRF2, TBC1D10A, DOCK8, RIC8B, KALRN
ENST00000327237	ENSG00000140688	C16orf58	protein_coding	18.3232	1.24339e-13	7.19589e-10		GOTERM_MF_DIRECT	GO:0005102~receptor binding	14	3.30189	0.0490937	0.0490937	SSFA2, HLA-A, CNPY3, HLA-B, WIPI1, HLA-F, TNFSF10, LAMA4, NUDT7, HSD17B4, LEPROT, ABL1, SLC27A2, IDUA
ENST00000397881	ENSG00000130813	C19orf66	protein_coding	3.81878	0.000505009	0.025163
ENST00000514429	ENSG00000197603	C5orf42	protein_coding	10.9607	6.36625e-07	0.000160059		Category	Term	Count	%	PValue	FDR	Genes
ENST00000394990	ENSG00000186577	C6orf1	protein_coding	5.10587	0.000863154	0.0377008		GOTERM_CC_DIRECT	GO:0005829~cytosol	108	0.160235	7.62e-06	0.00016764	CAST, GMPR2, THRA, CHMP3, RPL13, NT5C3B, PPP2R5D, PDLIM5, SELENBP1, TTN, RAB1A, ACTG1, RPLP0, PRKACA, MYO6, STK24, WNK1, RIC8B, DCTN3, PPP1CC, RPS16, RASGRF2, VAMP8, CC2D2A, USO1, TRAPPC5, NFE2L2, RNF135, GBP2, KALRN, RBP4, NFKBIB, CEP164, OCRL, PSMA7, RASAL2, OAZ2, UBE2D3, EIF3B, PSMB3, STX16, TCTN1, NDRG1, NDRG2, DOPEY1, LAMTOR5, SYS1, SREBF1, GPD1, ACY1, S100A16, MOCS2, SPHK2, ADPRM, TBC1D10A,…
ENST00000614363	ENSG00000204387	C6orf48	protein_coding	12.464	8.64855e-07	0.000196282		GOTERM_CC_DIRECT	GO:0005913~cell-cell adherens junction	21	0.0311568	2.85e-05	0.000308733	CAST, YWHAZ, MYO6, STK24, TBC1D10A, PDLIM5, KTN1, TXNDC9, ITGB1, RAB1A, TMEM2, ATXN2L, EPB41L1, SH3GLB1, IST1, USO1, NDRG1, CC2D1A, EHD1, SEPT9, DLG1
ENST00000344417	ENSG00000146576	C7orf26	protein_coding	10.0048	7.21184e-06	0.000927496		GOTERM_CC_DIRECT	GO:0070062~extracellular exosome	92	0.136496	4.21e-05	0.000308733	CHMP3, TM7SF3, LGMN, HP, SELENBP1, TTN, RAB1A, ACTG1, CD47, WISP2, FAM49B, DDX11, RPLP0, AIF1L, PRKACA, CFI, PLCB1, FCGR3A, DLG1, IDUA, MYO6, PEPD, RBL2, PFKL, STK24, ICAM2, HLA-A, NDUFA13, MINK1, HLA-B, HDAC11, DECR1, DDR1, RPS16, SERPINF1, DNPH1, VAMP8, GNAS, WASL, MFAP4, SLC27A2, UGP2, KALRN, RBP4, MEGF8, YWHAZ, WDR60, CLDN11, PSMA7, OCRL, ITGB1, ACP1, ALDH3A2, UBE2D3, EIF3B, NHLRC3, HSPA2, SH…
ENST00000519791	ENSG00000189376	C8orf76	protein_coding	9.47142	1.22558e-05	0.00136839		GOTERM_CC_DIRECT	GO:0016020~membrane	75	0.111274	7.9e-05	0.0004345	CAST, RPL13, PDLIM5, SELENBP1, CSPG5, ALG9, ACTG1, CLPTM1L, FAM49B, NISCH, SRPX, BAG6, RNF141, ITPRIP, RPLP0, PRKACA, PARD3B, ASPH, CFI, SLC4A3, PIGA, PTPRK, PHRF1, OPA1, MYO6, PFKL, STK24, ICAM2, HLA-A, WNK1, KTN1, PIGT, HLA-B, MCM3, HLA-F, PNPLA8, DDR1, RPS16, FAM120A, VAMP8, USO1, GNAS, C16ORF58, STK16, SFXN3, ITGB1, PSMF1, KIAA2013, ATXN2L, HSPA2, SH3GLB1, KLC1, ITGAV, STX16, MSLN, CAMK2D, HL…
ENST00000594523	ENSG00000160014	CALM3	protein_coding	7.78941	0.000115817	0.0077488		GOTERM_CC_DIRECT	GO:0048471~perinuclear region of cytoplasm	27	0.0400588	0.00115037	0.00457796	STK16, RAB40C, ITGB1, NXT2, PSMF1, STX16, CAMK2D, NDRG1, NDRG2, EHD1, DLG1, MYO6, TAF8, LMNA, CDK7, DCTN3, MCM3, RHBDD2, PNPLA8, SERPINF1, VAMP8, USO1, GNAS, ABL1, GBP2, SEPT9, ARHGAP10
ENST00000513132	ENSG00000145349	CAMK2D	protein_coding	8.23078	2.69311e-05	0.00250869		GOTERM_CC_DIRECT	GO:0000139~Golgi membrane	26	0.0385751	0.00124853	0.00457796	ABCA7, CYTH1, CSPG5, RAB1A, SH3GLB1, STX16, PKD1, HLA-DRB5, HS6ST1, DOPEY1, LEPROT, SREBF1, SYS1, TMEM167A, HLA-A, HLA-B, WIPI1, HLA-F, RHBDD2, PNPLA8, NOTCH4, TRAPPC5, USO1, PMEPA1, GBP2, ATP8A1
ENST00000518979	ENSG00000105483	CARD8	protein_coding	8.05422	5.5917e-05	0.00451075		GOTERM_CC_DIRECT	GO:0005739~mitochondrion	46	0.0682482	0.00208681	0.00655854	FASTKD1, ATP5SL, YWHAZ, MRPS15, CLPB, MRPS11, SFXN3, ECHDC2, WDR81, ATAD3A, HSPA2, NT5M, SH3GLB1, PSMB3, FITM2, LIAS, PRKACA, XAF1, HSD17B4, GUF1, ACAD8, NDUFS3, GPD1, SGK1, OPA1, RPUSD3, PSAP, CYCS, JTB, NDUFA13, ILF3, DECR1, CDK7, SPARC, PPP1CC, TIMM44, PHYH, P2RY12, LETM1, HEBP2, ATP5A1, USP48, MYO19, ABL1, SLC27A2, IQCE
ENST00000309190	ENSG00000153113	CAST	protein_coding	15.6419	1.03026e-10	1.32499e-07		GOTERM_CC_DIRECT	GO:0031901~early endosome membrane	9	0.0133529	0.00383174	0.0105373	ABCA7, VAMP8, SNX16, HLA-A, HLA-B, OCRL, EHD1, PMEPA1, HLA-F
ENST00000395812	ENSG00000153113	CAST	protein_coding	7.55326	0.000701535	0.0319686		GOTERM_CC_DIRECT	GO:0012507~ER to Golgi transport vesicle membrane	6	0.00890194	0.00531185	0.0129845	SREBF1, USO1, HLA-A, HLA-DRB5, HLA-B, HLA-F
ENST00000377384	ENSG00000147996	CBWD5	protein_coding	-7.14015	0.000316731	0.0171732		GOTERM_CC_DIRECT	GO:0030496~midbody	9	0.0133529	0.00722065	0.0158854	SSH1, DDX11, SH3GLB1, IST1, JTB, PKN1, TXNDC9, PPP1CC, DCTN3
ENST00000216133	ENSG00000100307	CBX7	protein_coding	-10.6784	2.41406e-05	0.00231563		GOTERM_CC_DIRECT	GO:0005737~cytoplasm	136	0.201777	0.00986318	0.0195056	CAST, GMPR2, NT5C3B, LMO3, PDLIM5, RPS6KB2, CBX7, DDX11, MDFIC, RPLP0, RNF38, AIF1L, OPA1, MYO6, RBL2, STK24, WNK1, TXNDC9, RIC8B, PPP1CC, RALGAPA1, RBPMS, DCAF8, VAMP8, TGFB1I1, NFE2L2, RNF135, SEPT9, STK16, SSH1, TMEM214, NTAN1, OCRL, PSMA7, ACP1, ITGB1, LLGL2, RASAL2, OAZ2, EIF3B, KBTBD4, PSMB3, STX16, NDRG1, UBAP2L, NDRG2, SREBF1, MDFI, CARD8, MOCS2, ACY1, S100A16, PODXL, CREBBP, JTB, GARS, D…
ENST00000318003	ENSG00000132024	CC2D1A	protein_coding	7.88172	0.000172926	0.0107418		GOTERM_CC_DIRECT	GO:0016023~cytoplasmic, membrane-bounded vesicle	9	0.0133529	0.0106394	0.0195056	CHMP3, MYO6, KLC1, IST1, PKN1, PIGT, WASL, GGNBP2, RIN3
ENST00000503292	ENSG00000048342	CC2D2A	protein_coding	16.0424	3.45743e-08	1.4986e-05		GOTERM_CC_DIRECT	GO:0005813~centrosome	18	0.0267058	0.0124078	0.0209979	JTB, ALMS1, CEP164, TXNDC9, MCM3, RIC8B, DCTN3, WDR81, PCGF5, DDX11, IST1, MZT2A, CALM3, NDRG1, ODF2, PRKACA, NFE2L2, NDRG2
ENST00000370491	ENSG00000137944	CCBL2	protein_coding	8.01978	0.000104847	0.00715267		GOTERM_CC_DIRECT	GO:0034704~calcium channel complex	4	0.00593463	0.0164293	0.0240963	CAMK2D, CALM3, PRKACA, ASPH
ENST00000451521	ENSG00000204536	CCHCR1	protein_coding	10.546	4.90285e-06	0.000701569		GOTERM_CC_DIRECT	GO:0000421~autophagosome membrane	4	0.00593463	0.0164293	0.0240963	TM9SF1, SH3GLB1, ATG14, WIPI1
ENST00000368034	ENSG00000122223	CD244	protein_coding	6.8408	0.000848497	0.0371541		GOTERM_CC_DIRECT	GO:0032154~cleavage furrow	5	0.00741829	0.018785	0.0253588	SSH1, PKN1, PPP1CC, DCTN3, ITGB1
ENST00000355354	ENSG00000196776	CD47	protein_coding	8.47473	0.00086758	0.0377991		GOTERM_CC_DIRECT	GO:0005654~nucleoplasm	77	0.114242	0.0195954	0.0253588	THRA, ARID4A, PPP2R5D, PRKAG2, HR, RPS6KB2, RBM7, CBX7, MCM8, DCAF11, BAG6, DDX11, PRMT7, MDFIC, RNF38, PRKACA, TPR, MKL1, AKT2, SGK1, OPA1, MYO6, SNAPC2, RBL2, STK24, TLE3, NDUFA13, PKN1, SEL1L3, VEZT, DECR1, CDK7, MCM3, RBPMS, RPS16, RBM39, SCAF8, PMEPA1, NUP98, YWHAZ, POLR2E, SSH1, MKNK1, CEP164, PSMA7, LLGL2, NXT2, PSMF1, UBE2D3, EIF3B, PSMB3, CAMK2D, NDRG2, ERCC2, POLR3G, SREBF1, BRD1, CARD8…
ENST00000615951	ENSG00000248333	CDK11B	protein_coding	2.39769	0.000969985	0.041323		GOTERM_CC_DIRECT	GO:0042612~MHC class I protein complex	3	0.00445097	0.0227536	0.02781	HLA-A, HLA-B, HLA-F
ENST00000508726	ENSG00000134058	CDK7	protein_coding	10.9248	9.02059e-07	0.000200789		GOTERM_CC_DIRECT	GO:0071556~integral component of lumenal side of endoplasmic reticulum membrane	4	0.00593463	0.0244944	0.0283619	HLA-A, HLA-DRB5, HLA-B, HLA-F
ENST00000533706	ENSG00000110274	CEP164	protein_coding	6.26992	0.000188274	0.0115915		GOTERM_CC_DIRECT	GO:0005778~peroxisomal membrane	5	0.00741829	0.0296205	0.0325825	PNPLA8, HMGCR, HSD17B4, SLC27A2, ALDH3A2
ENST00000512148	ENSG00000205403	CFI	protein_coding	12.0179	4.21646e-05	0.00362407		GOTERM_CC_DIRECT	GO:0032587~ruffle membrane	6	0.00890194	0.0330465	0.0346201	ABCA7, MYO6, ITGAV, AIF1L, ITGB1, AKT2
ENST00000263856	ENSG00000115561	CHMP3	protein_coding	7.82729	0.000650566	0.0302009		GOTERM_CC_DIRECT	GO:0043209~myelin sheath	8	0.0118693	0.0484612	0.0484612	ACTG1, HSPA2, NDRG1, ATP5A1, CLDN11, PLCB1, EHD1, NDUFS3
ENST00000591935	ENSG00000099622	CIRBP	protein_coding	6.54481	8.1136e-05	0.00590643
ENST00000567836	ENSG00000103249	CLCN7	protein_coding	7.36897	0.000340775	0.0182791		Category	Term	Count	%	PValue	FDR	Genes
ENST00000489485	ENSG00000013297	CLDN11	protein_coding	-4.83469	0.000263578	0.0149795		KEGG_PATHWAY	hsa04922:Glucagon signaling pathway	9	2.12264	0.00156257	0.0197384	PRKAG2, CREBBP, CAMK2D, CALM3, PRKACA, GNAS, PLCB1, SIK2, AKT2
ENST00000340729	ENSG00000162129	CLPB	protein_coding	15.233	2.67275e-07	7.73404e-05		KEGG_PATHWAY	hsa05416:Viral myocarditis	7	1.65094	0.00157907	0.0197384	ACTG1, CYCS, HLA-A, HLA-DRB5, HLA-B, ABL1, HLA-F
ENST00000320895	ENSG00000049656	CLPTM1L	protein_coding	7.72809	1.48091e-05	0.00156301		KEGG_PATHWAY	hsa04919:Thyroid hormone signaling pathway	9	2.12264	0.00379519	0.0316266	ACTG1, THRA, DIO2, ITGAV, NOTCH4, CREBBP, PRKACA, PLCB1, AKT2
ENST00000546466	ENSG00000257727	CNPY2	protein_coding	4.10181	0.000676093	0.0310949		KEGG_PATHWAY	hsa04611:Platelet activation	9	2.12264	0.00831477	0.0386594	ACTG1, P2RY12, VAMP8, PRKACA, GNAS, PLCB1, PPP1CC, ITGB1, AKT2
ENST00000372836	ENSG00000137161	CNPY3	protein_coding	8.95842	1.47117e-05	0.00155747		KEGG_PATHWAY	hsa05169:Epstein-Barr virus infection	11	2.59434	0.00973352	0.0386594	POLR3G, YWHAZ, POLR2E, HSPA2, NFKBIB, CREBBP, HLA-A, PRKACA, HLA-B, AKT2, HLA-F
ENST00000380605	ENSG00000088882	CPXM1	protein_coding	9.5032	0.000237467	0.013812		KEGG_PATHWAY	hsa05016:Huntington's disease	11	2.59434	0.0104348	0.0386594	NRF1, POLR2E, NDUFV1, CYCS, CREBBP, NDUFC2, NDUFA13, ATP5A1, PLCB1, NDUFS3, ATP5G3
ENST00000262367	ENSG00000005339	CREBBP	protein_coding	-10.9354	1.80606e-10	1.9598e-07		KEGG_PATHWAY	hsa05414:Dilated cardiomyopathy	7	1.65094	0.0108315	0.0386594	ACTG1, ITGAV, LMNA, PRKACA, GNAS, TTN, ITGB1
ENST00000456150	ENSG00000114646	CSPG5	protein_coding	8.43364	9.39628e-05	0.00661819		KEGG_PATHWAY	hsa05131:Shigellosis	6	1.41509	0.0136665	0.0386594	ACTG1, NFKBIB, WASF1, WASL, ABL1, ITGB1
ENST00000487179	ENSG00000244693	CTAGE8	protein_coding	12.6036	6.40716e-07	0.000160059		KEGG_PATHWAY	hsa05164:Influenza A	10	2.35849	0.0154508	0.0386594	ACTG1, TNFSF10, NUP98, HSPA2, NFKBIB, CYCS, CREBBP, HLA-DRB5, AKT2, NXT2
ENST00000409764	ENSG00000172115	CYCS	protein_coding	3.4102	0.0011124	0.0456585		KEGG_PATHWAY	hsa04720:Long-term potentiation	6	1.41509	0.0154638	0.0386594	CREBBP, CAMK2D, CALM3, PRKACA, PLCB1, PPP1CC
ENST00000361101	ENSG00000108669	CYTH1	protein_coding	-8.18694	0.000990393	0.0419395		KEGG_PATHWAY	hsa04916:Melanogenesis	7	1.65094	0.0238143	0.0445451	CREBBP, CAMK2D, CALM3, PRKACA, GNAS, PLCB1, FZD6
ENST00000446197	ENSG00000100897	DCAF11	protein_coding	-11.2028	1.28776e-08	6.77518e-06		KEGG_PATHWAY	hsa04728:Dopaminergic synapse	8	1.88679	0.0238857	0.0445451	PPP2R5D, CAMK2D, CALM3, PRKACA, GNAS, PLCB1, PPP1CC, AKT2
ENST00000610139	ENSG00000132716	DCAF8	protein_coding	-12.921	1.86785e-08	9.1351e-06		KEGG_PATHWAY	hsa04612:Antigen processing and presentation	6	1.41509	0.0268154	0.0445451	HSPA2, LGMN, HLA-A, HLA-DRB5, HLA-B, HLA-F
ENST00000259632	ENSG00000137100	DCTN3	protein_coding	9.33128	6.27436e-05	0.00488499		KEGG_PATHWAY	hsa05410:Hypertrophic cardiomyopathy (HCM)	6	1.41509	0.0295872	0.0445451	ACTG1, ITGAV, PRKAG2, LMNA, TTN, ITGB1
ENST00000376568	ENSG00000204580	DDR1	protein_coding	7.01485	6.3368e-05	0.00491158		KEGG_PATHWAY	hsa05100:Bacterial invasion of epithelial cells	6	1.41509	0.0295872	0.0445451	ACTG1, WASF1, WASL, ITGB1, SEPT9, ARHGAP10
ENST00000545668	ENSG00000013573	DDX11	protein_coding	-7.69688	3.94822e-07	0.00010546		KEGG_PATHWAY	hsa05010:Alzheimer's disease	9	2.12264	0.0336947	0.0445451	NDUFV1, CYCS, NDUFC2, NDUFA13, CALM3, ATP5A1, PLCB1, NDUFS3, ATP5G3
ENST00000520148	ENSG00000104325	DECR1	protein_coding	8.46378	0.00027807	0.0156241		KEGG_PATHWAY	hsa04910:Insulin signaling pathway	8	1.88679	0.0341306	0.0445451	SREBF1, PRKAG2, MKNK1, CALM3, RPS6KB2, PRKACA, PPP1CC, AKT2
ENST00000443035	ENSG00000174485	DENND4A	protein_coding	-13.3135	8.88107e-08	3.05753e-05		KEGG_PATHWAY	hsa04114:Oocyte meiosis	7	1.65094	0.0344348	0.0445451	REC8, YWHAZ, PPP2R5D, CAMK2D, CALM3, PRKACA, PPP1CC
ENST00000412516	ENSG00000169084	DHRSX	protein_coding	6.7819	0.000639326	0.0298387		KEGG_PATHWAY	hsa05332:Graft-versus-host disease	4	0.943396	0.0363549	0.0445451	HLA-A, HLA-DRB5, HLA-B, HLA-F
ENST00000438257	ENSG00000211448	DIO2	protein_coding	8.07981	5.96086e-06	0.000808535		KEGG_PATHWAY	hsa04514:Cell adhesion molecules (CAMs)	8	1.88679	0.038941	0.0445451	ITGAV, ICAM2, HLA-A, HLA-DRB5, CLDN11, HLA-B, ITGB1, HLA-F
ENST00000346964	ENSG00000075711	DLG1	protein_coding	11.3187	1.37171e-06	0.000275325		KEGG_PATHWAY	hsa05012:Parkinson's disease	8	1.88679	0.038941	0.0445451	NDUFV1, CYCS, NDUFC2, NDUFA13, PRKACA, ATP5A1, NDUFS3, ATP5G3
ENST00000230431	ENSG00000112667	DNPH1	protein_coding	5.19457	0.000699726	0.0319281		KEGG_PATHWAY	hsa05203:Viral carcinogenesis	10	2.35849	0.0391997	0.0445451	EGR3, YWHAZ, RBL2, CREBBP, HLA-A, PRKACA, HDAC11, HLA-B, DLG1, HLA-F
ENST00000382329	ENSG00000107099	DOCK8	protein_coding	7.07649	0.000429705	0.0219864		KEGG_PATHWAY	hsa04261:Adrenergic signaling in cardiomyocytes	8	1.88679	0.0441773	0.0480188	PPP2R5D, CAMK2D, CALM3, PRKACA, GNAS, PLCB1, PPP1CC, AKT2
ENST00000349129	ENSG00000083097	DOPEY1	protein_coding	4.3686	6.97122e-05	0.00532019		KEGG_PATHWAY	hsa05145:Toxoplasmosis	7	1.65094	0.0477274	0.0485696	LAMA4, HSPA2, NFKBIB, CYCS, HLA-DRB5, ITGB1, AKT2
ENST00000344450	ENSG00000112679	DUSP22	protein_coding	8.89736	8.24411e-05	0.00596966		KEGG_PATHWAY	hsa05330:Allograft rejection	4	0.943396	0.0485696	0.0485696	HLA-A, HLA-DRB5, HLA-B, HLA-F
ENST00000622875	ENSG00000164330	EBF1	protein_coding	10.0029	1.74755e-06	0.000326246
ENST00000460612	ENSG00000121310	ECHDC2	protein_coding	-7.31035	0.000108752	0.0074045
ENST00000369047	ENSG00000143369	ECM1	protein_coding	11.741	4.10131e-08	1.689e-05
ENST00000396231	ENSG00000186976	EFCAB6	protein_coding	6.94471	0.000528113	0.0260856
ENST00000317216	ENSG00000179388	EGR3	protein_coding	9.8545	1.12911e-05	0.00129834
ENST00000320631	ENSG00000110047	EHD1	protein_coding	6.45655	6.32409e-05	0.00491158
ENST00000397011	ENSG00000106263	EIF3B	protein_coding	8.96797	2.02737e-05	0.00199996
ENST00000315658	ENSG00000115459	ELMOD3	protein_coding	9.44707	1.74781e-05	0.00179029
ENST00000419198	ENSG00000100908	EMC9	protein_coding	7.1784	0.000589797	0.0281916
ENST00000506300	ENSG00000164035	EMCN	protein_coding	7.95998	0.000393229	0.020533
ENST00000522167	ENSG00000136960	ENPP2	protein_coding	16.1067	7.6579e-05	0.00569253
ENST00000373941	ENSG00000088367	EPB41L1	protein_coding	6.07976	5.87492e-10	5.66668e-07
ENST00000391944	ENSG00000104884	ERCC2	protein_coding	8.72494	1.29984e-05	0.00143221
ENST00000378239	ENSG00000068912	ERLEC1	protein_coding	5.30021	0.000486077	0.0244972
ENST00000572514	ENSG00000120705	ETF1	protein_coding	7.69922	0.00013547	0.00874358
ENST00000233379	ENSG00000115042	FAHD2A	protein_coding	8.5333	2.36275e-05	0.002279
ENST00000277165	ENSG00000048828	FAM120A	protein_coding	9.12591	0.000126739	0.00832413
ENST00000618804	ENSG00000148541	FAM13C	protein_coding	8.33735	6.09589e-05	0.00478166
ENST00000372955	ENSG00000138286	FAM149B1	protein_coding	10.0676	8.60525e-05	0.00614833
ENST00000509613	ENSG00000179304	FAM156B	protein_coding	9.1786	4.6745e-05	0.00391126
ENST00000615744	ENSG00000172366	FAM195A	protein_coding	-10.2113	8.59432e-06	0.00106203
ENST00000517654	ENSG00000153310	FAM49B	protein_coding	-4.09584	0.00103479	0.0429807
ENST00000449319	ENSG00000176973	FAM89B	protein_coding	5.65249	0.00061423	0.0289397
ENST00000453153	ENSG00000138399	FASTKD1	protein_coding	-10.5452	3.65744e-09	2.44233e-06
ENST00000436743	ENSG00000203747	FCGR3A	protein_coding	6.74906	0.000608717	0.0287646
ENST00000597512	ENSG00000130475	FCHO1	protein_coding	8.09613	3.03654e-05	0.00275332
ENST00000394153	ENSG00000022267	FHL1	protein_coding	20.6474	2.18846e-09	1.68871e-06
ENST00000396825	ENSG00000197296	FITM2	protein_coding	11.7409	1.0766e-07	3.60679e-05
ENST00000242209	ENSG00000122642	FKBP9	protein_coding	9.86757	0.000762233	0.034152
ENST00000369272	ENSG00000131781	FMO5	protein_coding	5.52355	0.00110418	0.0454472
ENST00000507873	ENSG00000075539	FRYL	protein_coding	-5.18195	6.06307e-05	0.00477402
ENST00000351325	ENSG00000266964	FXYD1	protein_coding	7.96586	0.000362318	0.0191786
ENST00000522566	ENSG00000164930	FZD6	protein_coding	7.60416	0.0001172	0.0078112
ENST00000389266	ENSG00000106105	GARS	protein_coding	10.3416	5.07723e-07	0.000131568
ENST00000370466	ENSG00000162645	GBP2	protein_coding	6.96899	2.59831e-05	0.0024473
ENST00000602496	ENSG00000141098	GFOD2	protein_coding	7.36961	0.000319076	0.0172384
ENST00000620927	ENSG00000278311	GGNBP2	protein_coding	-11.5681	3.45083e-05	0.00304128
ENST00000589389	ENSG00000140632	GLYR1	protein_coding	9.74593	0.000920451	0.0397534
ENST00000559910	ENSG00000100938	GMPR2	protein_coding	-5.82912	0.000670965	0.0309822
ENST00000265620	ENSG00000087460	GNAS	protein_coding	8.62263	1.75372e-05	0.00179106
ENST00000511473	ENSG00000204628	GNB2L1	protein_coding	9.47597	7.01814e-05	0.00534425
ENST00000376817	ENSG00000204628	GNB2L1	protein_coding	8.51895	0.000262555	0.0149459
ENST00000375896	ENSG00000204438	GPANK1	protein_coding	-12.3558	4.38377e-07	0.00011532
ENST00000547190	ENSG00000167588	GPD1	protein_coding	8.89083	0.000193638	0.0118796
ENST00000392585	ENSG00000183484	GPR132	protein_coding	8.47928	0.000558913	0.027258
ENST00000253458	ENSG00000131149	GSE1	protein_coding	9.59974	8.29091e-06	0.00103559
ENST00000506793	ENSG00000151806	GUF1	protein_coding	1.76722	0.00029289	0.0162206
ENST00000312726	ENSG00000143774	GUK1	protein_coding	12.254	1.03634e-06	0.000222134
ENST00000294973	ENSG00000162882	HAAO	protein_coding	7.48947	0.000509245	0.0253339
ENST00000437379	ENSG00000163517	HDAC11	protein_coding	9.04874	3.03686e-05	0.00275332
ENST00000367697	ENSG00000051620	HEBP2	protein_coding	8.06468	8.47473e-05	0.00608009
ENST00000012134	ENSG00000010818	HIVEP2	protein_coding	8.80493	0.000399632	0.0208269
ENST00000376809	ENSG00000206503	HLA-A	protein_coding	4.83258	0.000953908	0.0407925
ENST00000463574	ENSG00000234745	HLA-B	protein_coding	5.50537	0.00102424	0.0427471
ENST00000374975	ENSG00000198502	HLA-DRB5	protein_coding	5.74305	0.000729137	0.0329677
ENST00000434407	ENSG00000204642	HLA-F	protein_coding	6.30309	0.000228974	0.013465
ENST00000486194	ENSG00000204642	HLA-F	protein_coding	5.24817	0.00063581	0.0297145
ENST00000287936	ENSG00000113161	HMGCR	protein_coding	11.3685	2.06896e-08	9.84147e-06
ENST00000613459	ENSG00000113716	HMGXB3	protein_coding	7.60611	0.000929642	0.0399516
ENST00000565574	ENSG00000257017	HP	protein_coding	9.89362	6.64373e-05	0.00510392
ENST00000381418	ENSG00000168453	HR	protein_coding	7.15559	0.000576713	0.0278136
ENST00000259241	ENSG00000136720	HS6ST1	protein_coding	11.3547	7.81008e-08	2.82497e-05
ENST00000503168	ENSG00000133835	HSD17B4	protein_coding	3.73521	8.05409e-06	0.00101698
ENST00000509606	ENSG00000133835	HSD17B4	protein_coding	9.22847	1.77871e-05	0.0018007
ENST00000254963	ENSG00000132622	HSPA12B	protein_coding	7.14062	0.000341114	0.0182791
ENST00000394709	ENSG00000126803	HSPA2	protein_coding	8.31435	0.000171766	0.0106889
ENST00000579788	ENSG00000108622	ICAM2	protein_coding	10.342	1.40343e-06	0.00027689
ENST00000340855	ENSG00000010404	IDS	protein_coding	-8.26413	3.20772e-06	0.000518069
ENST00000247933	ENSG00000127415	IDUA	protein_coding	9.03836	3.16013e-06	0.000514812
ENST00000238609	ENSG00000119632	IFI27L2	protein_coding	-7.30622	3.8139e-07	0.000102662
ENST00000369486	ENSG00000143061	IGSF3	protein_coding	8.11069	5.95796e-05	0.00470191
ENST00000590869	ENSG00000129351	ILF3	protein_coding	8.40939	0.000818615	0.0361189
ENST00000452361	ENSG00000274049	INO80B-WBP1	protein_coding	8.38965	0.000490478	0.0246118
ENST00000402050	ENSG00000106012	IQCE	protein_coding	9.98037	2.7203e-06	0.000463038
ENST00000439924	ENSG00000182149	IST1	protein_coding	9.56112	4.18435e-06	0.000626281
ENST00000374907	ENSG00000138448	ITGAV	protein_coding	9.38722	6.1194e-05	0.00478581
ENST00000396033	ENSG00000150093	ITGB1	protein_coding	-4.36994	0.000674443	0.0310601
ENST00000278071	ENSG00000148841	ITPRIP	protein_coding	7.52347	5.29007e-05	0.00431202
ENST00000616966	ENSG00000171135	JAGN1	protein_coding	7.51268	0.000280646	0.0157434
ENST00000368589	ENSG00000143543	JTB	protein_coding	9.83333	3.17273e-06	0.000514812
ENST00000460856	ENSG00000160145	KALRN	protein_coding	7.70751	0.000114326	0.00769352
ENST00000371153	ENSG00000132854	KANK4	protein_coding	12.0602	1.30751e-08	6.77643e-06
ENST00000526005	ENSG00000123444	KBTBD4	protein_coding	7.10984	0.000878758	0.0381425
ENST00000159111	ENSG00000127663	KDM4B	protein_coding	-3.96254	0.000714748	0.0325281
ENST00000423313	ENSG00000235750	KIAA0040	protein_coding	3.14496	0.000817259	0.036105
ENST00000376572	ENSG00000116685	KIAA2013	protein_coding	8.75245	1.67616e-06	0.000316321
ENST00000553325	ENSG00000126214	KLC1	protein_coding	7.91293	0.000201952	0.0123461
ENST00000567298	ENSG00000104731	KLHDC4	protein_coding	10.5034	7.56497e-07	0.000181163
ENST00000438792	ENSG00000126777	KTN1	protein_coding	13.7135	7.48414e-09	4.33132e-06
ENST00000230538	ENSG00000112769	LAMA4	protein_coding	4.9779	0.000696659	0.03183
ENST00000602318	ENSG00000134248	LAMTOR5	protein_coding	5.35091	0.000746411	0.033573
ENST00000371065	ENSG00000213625	LEPROT	protein_coding	13.506	1.5824e-07	4.95021e-05
ENST00000302787	ENSG00000168924	LETM1	protein_coding	16.1749	4.84049e-09	3.05602e-06
ENST00000557609	ENSG00000100600	LGMN	protein_coding	10.6043	2.91252e-06	0.000483897
ENST00000381846	ENSG00000121897	LIAS	protein_coding	6.60886	0.000833433	0.0365868
ENST00000578638	ENSG00000073350	LLGL2	protein_coding	-1.53885	0.000319212	0.0172384
ENST00000508500	ENSG00000160789	LMNA	protein_coding	10.01	0.000113287	0.00764253
ENST00000447609	ENSG00000048540	LMO3	protein_coding	6.01236	0.00108838	0.0450451
ENST00000446859	ENSG00000171757	LRRC34	protein_coding	11.6706	9.73165e-06	0.00117334
ENST00000490035	ENSG00000185565	LSAMP	protein_coding	18.0977	1.49974e-08	7.54738e-06
ENST00000478396	ENSG00000136536	MARCH7	protein_coding	12.1471	1.38307e-06	0.000276009
ENST00000421471	ENSG00000112118	MCM3	protein_coding	8.20909	0.000131051	0.00852173
ENST00000265187	ENSG00000125885	MCM8	protein_coding	-8.32595	1.06794e-05	0.00124859
ENST00000230321	ENSG00000112559	MDFI	protein_coding	5.92625	0.000489858	0.0246118
ENST00000257724	ENSG00000135272	MDFIC	protein_coding	5.8318	0.000151001	0.00959222
ENST00000378073	ENSG00000105429	MEGF8	protein_coding	10.9109	2.06122e-07	6.2238e-05
ENST00000480046	ENSG00000165055	METTL2B	protein_coding	8.39105	0.00102358	0.0427471
ENST00000395592	ENSG00000166482	MFAP4	protein_coding	6.06267	0.000194392	0.0119049
ENST00000347992	ENSG00000141503	MINK1	protein_coding	-12.7539	3.65604e-06	0.000566752
ENST00000620651	ENSG00000196588	MKL1	protein_coding	8.49554	3.27373e-05	0.00292229
ENST00000371945	ENSG00000079277	MKNK1	protein_coding	11.0583	1.24845e-06	0.000258042
ENST00000396954	ENSG00000164172	MOCS2	protein_coding	9.05853	3.0187e-05	0.00275122
ENST00000448244	ENSG00000055950	MRPL43	protein_coding	-6.43763	9.43102e-05	0.00662921
ENST00000353598	ENSG00000181991	MRPS11	protein_coding	9.21161	0.000100154	0.0069278
ENST00000477040	ENSG00000116898	MRPS15	protein_coding	4.91127	0.000369326	0.0193583
ENST00000412309	ENSG00000110077	MS4A6A	protein_coding	7.2668	0.000364261	0.0192228
ENST00000566269	ENSG00000102854	MSLN	protein_coding	12.6013	5.38155e-05	0.00437632
ENST00000320736	ENSG00000176945	MUC20	protein_coding	7.70203	0.000218267	0.0130002
ENST00000610930	ENSG00000278259	MYO19	protein_coding	9.08417	8.12804e-06	0.00101891
ENST00000369977	ENSG00000196586	MYO6	protein_coding	10.6762	0.000115602	0.0077488
ENST00000309451	ENSG00000173272	MZT2A	protein_coding	7.4118	0.000409499	0.021223
ENST00000321955	ENSG00000077616	NAALAD2	protein_coding	6.24235	0.000314214	0.0171015
ENST00000521026	ENSG00000104419	NDRG1	protein_coding	9.05962	0.00114013	0.0465765
ENST00000298684	ENSG00000165795	NDRG2	protein_coding	13.9186	3.19128e-07	8.9366e-05
ENST00000606722	ENSG00000186010	NDUFA13	protein_coding	8.31019	5.84536e-05	0.00463731
ENST00000281031	ENSG00000151366	NDUFC2	protein_coding	-7.67878	0.000502087	0.0251217
ENST00000263774	ENSG00000213619	NDUFS3	protein_coding	5.59063	0.00101192	0.0424884
ENST00000415352	ENSG00000167792	NDUFV1	protein_coding	7.04995	8.24283e-05	0.00596966
ENST00000375425	ENSG00000204356	NELFE	protein_coding	16.9586	1.41514e-07	4.54995e-05
ENST00000456735	ENSG00000196712	NF1	protein_coding	6.29864	3.08986e-05	0.00279407
ENST00000464747	ENSG00000116044	NFE2L2	protein_coding	1.47122	0.00103196	0.0429147
ENST00000313582	ENSG00000104825	NFKBIB	protein_coding	9.57927	1.30336e-05	0.00143221
ENST00000556483	ENSG00000129460	NGDN	protein_coding	10.8418	6.45354e-07	0.000160066
ENST00000610563	ENSG00000188811	NHLRC3	protein_coding	7.83717	0.00022928	0.013465
ENST00000556572	ENSG00000087303	NID2	protein_coding	-8.39502	2.2362e-05	0.00218118
ENST00000479054	ENSG00000010322	NISCH	protein_coding	-7.20792	0.00082725	0.0364074
ENST00000375023	ENSG00000204301	NOTCH4	protein_coding	10.9174	1.60646e-05	0.00168527
ENST00000618101	ENSG00000119508	NR4A3	protein_coding	11.4246	0.00112712	0.0461535
ENST00000393230	ENSG00000106459	NRF1	protein_coding	9.85498	2.28258e-06	0.00040439
ENST00000393910	ENSG00000141698	NT5C3B	protein_coding	17.129	4.61664e-09	2.96867e-06
ENST00000389022	ENSG00000205309	NT5M	protein_coding	7.27155	0.000462806	0.0234606
ENST00000287706	ENSG00000157045	NTAN1	protein_coding	10.0812	6.14628e-06	0.000823478
ENST00000317501	ENSG00000140538	NTRK3	protein_coding	6.95754	0.00100265	0.0423037
ENST00000564031	ENSG00000140876	NUDT7	protein_coding	11.733	6.7201e-06	0.000880561
ENST00000429801	ENSG00000110713	NUP98	protein_coding	-13.6231	8.4144e-08	2.98144e-05
ENST00000372106	ENSG00000101888	NXT2	protein_coding	8.73418	6.23938e-07	0.000158143
ENST00000326005	ENSG00000180304	OAZ2	protein_coding	4.47111	0.000117657	0.00782664
ENST00000597836	ENSG00000099330	OCEL1	protein_coding	6.4852	0.000941299	0.0403201
ENST00000357121	ENSG00000122126	OCRL	protein_coding	10.2144	1.55651e-05	0.00163782
ENST00000393527	ENSG00000136811	ODF2	protein_coding	9.77828	1.20271e-05	0.00135049
ENST00000482865	ENSG00000198836	OPA1	protein_coding	8.19682	6.77644e-05	0.00519437
ENST00000454497	ENSG00000164164	OTUD4	protein_coding	3.41741	0.000832499	0.0365868
ENST00000617869	ENSG00000155100	OTUD6B	protein_coding	9.67347	2.96423e-06	0.00048782
ENST00000302632	ENSG00000169313	P2RY12	protein_coding	8.47725	8.40985e-05	0.00604759
ENST00000507634	ENSG00000163138	PACRGL	protein_coding	-3.98979	0.000351158	0.0187594
ENST00000614500	ENSG00000116117	PARD3B	protein_coding	10.7364	1.18877e-05	0.00134458
ENST00000511044	ENSG00000156453	PCDH1	protein_coding	7.45953	3.70572e-05	0.00323537
ENST00000336126	ENSG00000180628	PCGF5	protein_coding	76.9457	1.88827e-16	6.55684e-12
ENST00000317968	ENSG00000163110	PDLIM5	protein_coding	1.63652	0.00114972	0.0469128
ENST00000591968	ENSG00000124299	PEPD	protein_coding	7.99042	0.000100703	0.00695193
ENST00000361923	ENSG00000049246	PER3	protein_coding	-12.0893	0.000165745	0.0103818
ENST00000221480	ENSG00000104883	PEX11G	protein_coding	8.79894	0.000115117	0.00773176
ENST00000349048	ENSG00000141959	PFKL	protein_coding	8.51296	0.000215475	0.0129449
ENST00000488958	ENSG00000136147	PHF11	protein_coding	11.2011	8.93698e-06	0.00109656
ENST00000367309	ENSG00000174307	PHLDA3	protein_coding	6.1191	0.000191093	0.0117443
ENST00000527898	ENSG00000019144	PHLDB1	protein_coding	7.98957	5.91343e-06	0.000805838
ENST00000416188	ENSG00000070047	PHRF1	protein_coding	8.61644	1.29307e-06	0.000262576
ENST00000396913	ENSG00000107537	PHYH	protein_coding	7.32378	0.00054486	0.0267606
ENST00000542278	ENSG00000165195	PIGA	protein_coding	8.26929	4.64248e-06	0.000678362
ENST00000543458	ENSG00000124155	PIGT	protein_coding	-10.392	6.86849e-05	0.00525334
ENST00000569031	ENSG00000234465	PINLYP	protein_coding	7.24363	0.000250567	0.014436
ENST00000487932	ENSG00000008710	PKD1	protein_coding	9.8754	1.61243e-07	4.99912e-05
ENST00000342216	ENSG00000123143	PKN1	protein_coding	11.7329	1.64881e-05	0.0017245
ENST00000586237	ENSG00000123143	PKN1	protein_coding	7.4155	0.000309518	0.0169139
ENST00000617005	ENSG00000182621	PLCB1	protein_coding	22.1458	1.16855e-11	2.09653e-08
ENST00000341744	ENSG00000124225	PMEPA1	protein_coding	9.16704	6.10414e-06	0.000823289
ENST00000216259	ENSG00000100417	PMM1	protein_coding	4.7637	0.000807234	0.0357987
ENST00000257694	ENSG00000135241	PNPLA8	protein_coding	23.8189	4.23227e-07	0.000112184
ENST00000446198	ENSG00000128567	PODXL	protein_coding	8.23947	8.95068e-05	0.00634292
ENST00000334538	ENSG00000186866	POFUT2	protein_coding	-10.0318	0.00102996	0.0428831
ENST00000586746	ENSG00000099817	POLR2E	protein_coding	18.1307	1.97966e-08	9.54744e-06
ENST00000504930	ENSG00000113356	POLR3G	protein_coding	9.20411	1.31586e-05	0.00143757
ENST00000551676	ENSG00000186298	PPP1CC	protein_coding	7.7117	0.000205927	0.0124662
ENST00000394110	ENSG00000112640	PPP2R5D	protein_coding	-8.80603	7.43163e-09	4.33132e-06
ENST00000308677	ENSG00000072062	PRKACA	protein_coding	9.45201	1.33559e-05	0.00144512
ENST00000287878	ENSG00000106617	PRKAG2	protein_coding	12.9499	2.50539e-07	7.31068e-05
ENST00000441236	ENSG00000132600	PRMT7	protein_coding	-9.71589	1.34262e-05	0.00144786
ENST00000394934	ENSG00000197746	PSAP	protein_coding	-5.19842	0.000903988	0.039091
ENST00000442551	ENSG00000101182	PSMA7	protein_coding	4.46225	0.000216885	0.0129623
ENST00000619426	ENSG00000277791	PSMB3	protein_coding	9.41984	1.04542e-05	0.00122667
ENST00000333082	ENSG00000125818	PSMF1	protein_coding	9.21583	0.000630428	0.0295429
ENST00000392449	ENSG00000152894	PTPRK	protein_coding	5.09238	0.00111024	0.0456236
ENST00000373779	ENSG00000060656	PTPRU	protein_coding	7.36022	0.000284124	0.015901
ENST00000398529	ENSG00000138069	RAB1A	protein_coding	12.0899	4.90961e-06	0.000701569
ENST00000538492	ENSG00000197562	RAB40C	protein_coding	9.93419	5.23351e-06	0.000729833
ENST00000284957	ENSG00000154710	RABGEF1	protein_coding	4.70776	0.000927057	0.03992
ENST00000354869	ENSG00000079974	RABL2B	protein_coding	9.64322	0.000151104	0.00959222
ENST00000389698	ENSG00000174373	RALGAPA1	protein_coding	8.39368	9.22929e-05	0.00651377
ENST00000246194	ENSG00000125970	RALY	protein_coding	7.89771	0.000368801	0.0193583
ENST00000589683	ENSG00000131477	RAMP2	protein_coding	7.56475	0.000522563	0.0258483
ENST00000462775	ENSG00000075391	RASAL2	protein_coding	3.35858	0.000620177	0.0291803
ENST00000265080	ENSG00000113319	RASGRF2	protein_coding	12.8105	1.21597e-08	6.59739e-06
ENST00000396912	ENSG00000146587	RBAK	protein_coding	9.98589	4.26551e-06	0.000632972
ENST00000262133	ENSG00000103479	RBL2	protein_coding	8.97599	2.93354e-05	0.00268064
ENST00000346528	ENSG00000100461	RBM23	protein_coding	14.856	2.61893e-09	1.93488e-06
ENST00000379052	ENSG00000112183	RBM24	protein_coding	8.41268	2.44877e-07	7.20602e-05
ENST00000397370	ENSG00000131051	RBM39	protein_coding	-11.0985	4.85349e-06	0.000699305
ENST00000434854	ENSG00000089682	RBM41	protein_coding	6.96281	0.000736544	0.0332585
ENST00000542140	ENSG00000076053	RBM7	protein_coding	6.5475	0.000182204	0.0112378
ENST00000371469	ENSG00000138207	RBP4	protein_coding	6.73938	7.99585e-05	0.00585755
ENST00000519359	ENSG00000157110	RBPMS	protein_coding	9.53182	1.14406e-05	0.00131111
ENST00000452621	ENSG00000117625	RCOR3	protein_coding	8.06554	5.78445e-05	0.00461746
ENST00000611366	ENSG00000100918	REC8	protein_coding	11.5698	0.000165358	0.0103818
ENST00000295802	ENSG00000042445	RETSAT	protein_coding	-13.2965	5.77945e-14	4.01371e-10
ENST00000310496	ENSG00000169733	RFNG	protein_coding	7.73794	0.00117272	0.0477392
ENST00000318622	ENSG00000005486	RHBDD2	protein_coding	9.45894	2.87793e-06	0.000480448
ENST00000462949	ENSG00000111785	RIC8B	protein_coding	5.72408	0.000893737	0.0387442
ENST00000418924	ENSG00000100599	RIN3	protein_coding	-10.8358	7.18399e-06	0.000927349
ENST00000535306	ENSG00000181481	RNF135	protein_coding	8.00612	5.61296e-05	0.00451167
ENST00000265981	ENSG00000110315	RNF141	protein_coding	9.81806	6.56215e-05	0.00505242
ENST00000353739	ENSG00000137075	RNF38	protein_coding	-4.1766	0.000978764	0.0415484
ENST00000587843	ENSG00000067836	ROGDI	protein_coding	6.59373	0.000599141	0.0284215
ENST00000546267	ENSG00000233024	RP11-1212A22.4	protein_coding	-9.25727	4.80248e-10	4.76461e-07
ENST00000331302	ENSG00000181031	RPH3AL	protein_coding	8.55579	3.23598e-05	0.00289604
ENST00000452368	ENSG00000167526	RPL13	protein_coding	-1.17953	1.86254e-05	0.00186913
ENST00000551150	ENSG00000089157	RPLP0	protein_coding	6.55389	0.000342456	0.0183227
ENST00000602153	ENSG00000105193	RPS16	protein_coding	6.08577	0.000383356	0.0200477
ENST00000528964	ENSG00000175634	RPS6KB2	protein_coding	5.30467	0.000575176	0.0278136
ENST00000383820	ENSG00000156990	RPUSD3	protein_coding	7.02528	0.000429384	0.0219864
ENST00000243189	ENSG00000117616	RSRP1	protein_coding	9.67529	3.35647e-06	0.000527376
ENST00000286777	ENSG00000156253	RWDD2B	protein_coding	8.52384	1.86784e-05	0.00186913
ENST00000368704	ENSG00000188643	S100A16	protein_coding	12.2882	3.49576e-08	1.4986e-05
ENST00000417268	ENSG00000213079	SCAF8	protein_coding	10.3471	3.23618e-06	0.000520246
ENST00000555365	ENSG00000100445	SDR39U1	protein_coding	12.0398	0.000728366	0.0329677
ENST00000264868	ENSG00000091490	SEL1L3	protein_coding	12.1697	7.73362e-07	0.000181448
ENST00000470345	ENSG00000143416	SELENBP1	protein_coding	10.8486	8.48517e-07	0.000195125
ENST00000514985	ENSG00000250722	SEPP1	protein_coding	7.89745	0.000227411	0.0134534
ENST00000427177	ENSG00000184640	SEPT9	protein_coding	10.5074	3.30389e-06	0.000523556
ENST00000573763	ENSG00000132386	SERPINF1	protein_coding	8.36417	0.000126618	0.00832413
ENST00000481477	ENSG00000185917	SETD4	protein_coding	8.2069	7.67222e-05	0.00569253
ENST00000406341	ENSG00000168137	SETD5	protein_coding	14.4691	1.15908e-08	6.38857e-06
ENST00000224807	ENSG00000107819	SFXN3	protein_coding	5.97868	0.000104347	0.00714066
ENST00000472326	ENSG00000127990	SGCE	protein_coding	-6.2157	9.7796e-05	0.00680535
ENST00000367857	ENSG00000118515	SGK1	protein_coding	36.422	1.08399e-12	4.18226e-09
ENST00000370558	ENSG00000097033	SH3GLB1	protein_coding	9.80449	0.000794939	0.035389
ENST00000356721	ENSG00000196470	SIAH1	protein_coding	8.17135	0.000178203	0.0110499
ENST00000304987	ENSG00000170145	SIK2	protein_coding	7.60944	0.000358194	0.0190474
ENST00000262861	ENSG00000116991	SIPA1L2	protein_coding	-8.05298	7.47862e-05	0.00559948
ENST00000393587	ENSG00000126903	SLC10A3	protein_coding	6.95247	0.000866344	0.0377926
ENST00000266771	ENSG00000139370	SLC15A4	protein_coding	10.0818	1.50147e-06	0.000289651
ENST00000397260	ENSG00000092096	SLC22A17	protein_coding	8.00749	0.000142408	0.00916876
ENST00000267842	ENSG00000140284	SLC27A2	protein_coding	8.25526	0.00014568	0.00933319
ENST00000297195	ENSG00000164638	SLC29A4	protein_coding	8.34784	1.00959e-05	0.00120461
ENST00000372230	ENSG00000080189	SLC35C2	protein_coding	10.148	5.31006e-06	0.000737546
ENST00000317151	ENSG00000114923	SLC4A3	protein_coding	-10.5448	6.14562e-05	0.00479552
ENST00000251303	ENSG00000132207	SLX1A	protein_coding	7.93449	7.87273e-05	0.0057918
ENST00000229570	ENSG00000111850	SMIM8	protein_coding	6.52373	0.00119838	0.0486698
ENST00000361956	ENSG00000198732	SMOC1	protein_coding	8.17702	0.000724366	0.0328796
ENST00000221573	ENSG00000104976	SNAPC2	protein_coding	8.12147	2.58422e-05	0.00244508
ENST00000396330	ENSG00000104497	SNX16	protein_coding	10.2109	1.27676e-05	0.00141643
ENST00000520687	ENSG00000113140	SPARC	protein_coding	10.9753	1.20566e-05	0.00135049
ENST00000599748	ENSG00000063176	SPHK2	protein_coding	8.23916	0.000118065	0.00783878
ENST00000395757	ENSG00000072310	SREBF1	protein_coding	3.50363	0.000721353	0.0327857
ENST00000479015	ENSG00000101955	SRPX	protein_coding	7.39741	0.00120744	0.0489803
ENST00000470654	ENSG00000138434	SSFA2	protein_coding	-8.39304	1.38413e-07	4.49182e-05
ENST00000546433	ENSG00000084112	SSH1	protein_coding	-4.66585	0.000362915	0.0191809
ENST00000369669	ENSG00000007341	ST7L	protein_coding	2.52178	0.000276964	0.0155872
ENST00000444874	ENSG00000272752	STAG3L5P-PVRIG2P-PILRB	protein_coding	8.20041	0.000212047	0.0127832
ENST00000396738	ENSG00000115661	STK16	protein_coding	9.14244	0.0001456	0.00933319
ENST00000444574	ENSG00000102572	STK24	protein_coding	10.5078	5.68582e-06	0.000780373
ENST00000358029	ENSG00000124222	STX16	protein_coding	8.36835	0.000649257	0.0302009
ENST00000272902	ENSG00000144455	SUMF1	protein_coding	8.49787	4.29772e-05	0.00367571
ENST00000367248	ENSG00000131018	SYNE1	protein_coding	7.40796	0.000248191	0.0143397
ENST00000453003	ENSG00000204070	SYS1	protein_coding	-10.2558	1.70364e-05	0.00175133
ENST00000372977	ENSG00000137413	TAF8	protein_coding	-5.75579	2.18491e-05	0.00213715
ENST00000611779	ENSG00000213977	TAX1BP3	protein_coding	10.0576	3.29825e-06	0.000523556
ENST00000215790	ENSG00000099992	TBC1D10A	protein_coding	8.0156	9.49032e-05	0.00665741
ENST00000519746	ENSG00000197226	TBC1D9B	protein_coding	7.1862	0.000593063	0.0282103
ENST00000480648	ENSG00000204852	TCTN1	protein_coding	7.09978	0.000729155	0.0329677
ENST00000266304	ENSG00000167074	TEF	protein_coding	9.15478	0.00062389	0.0293152
ENST00000265149	ENSG00000168769	TET2	protein_coding	11.7091	8.98133e-08	3.05753e-05
ENST00000567607	ENSG00000140682	TGFB1I1	protein_coding	11.5558	6.035e-08	2.30285e-05
ENST00000612200	ENSG00000176946	THAP4	protein_coding	-11.4906	6.91301e-09	4.13875e-06
ENST00000584985	ENSG00000126351	THRA	protein_coding	-5.22581	7.40297e-05	0.00556408
ENST00000595565	ENSG00000104980	TIMM44	protein_coding	-11.0456	1.16359e-05	0.00132474
ENST00000559608	ENSG00000140332	TLE3	protein_coding	7.83637	0.000109679	0.00745303
ENST00000343028	ENSG00000064115	TM7SF3	protein_coding	19.1958	3.42075e-08	1.4986e-05
ENST00000261789	ENSG00000100926	TM9SF1	protein_coding	6.66519	0.000127505	0.00833888
ENST00000434316	ENSG00000150403	TMCO3	protein_coding	12.3957	0.000229562	0.013465
ENST00000511118	ENSG00000174695	TMEM167A	protein_coding	8.85671	0.000284371	0.015901
ENST00000474495	ENSG00000135048	TMEM2	protein_coding	8.66913	2.72053e-05	0.00252588
ENST00000377043	ENSG00000135048	TMEM2	protein_coding	8.33563	8.25203e-05	0.00596966
ENST00000404032	ENSG00000119777	TMEM214	protein_coding	8.79661	7.81447e-05	0.0057734
ENST00000556422	ENSG00000070269	TMEM260	protein_coding	8.55241	8.08243e-05	0.0058961
ENST00000378602	ENSG00000178821	TMEM52	protein_coding	8.28232	0.000291842	0.0162143
ENST00000310991	ENSG00000178821	TMEM52	protein_coding	-6.80052	1.39973e-06	0.00027689
ENST00000416695	ENSG00000188167	TMPPE	protein_coding	8.58126	3.9391e-05	0.003411
ENST00000420541	ENSG00000121858	TNFSF10	protein_coding	-9.23679	5.9932e-07	0.00015302
ENST00000549311	ENSG00000111077	TNS2	protein_coding	6.94243	9.87723e-05	0.00684584
ENST00000611016	ENSG00000168477	TNXB	protein_coding	7.75569	0.000558584	0.027258
ENST00000474486	ENSG00000158882	TOMM40L	protein_coding	-12.2993	1.15948e-11	2.09653e-08
ENST00000467810	ENSG00000047410	TPR	protein_coding	-10.4251	1.11151e-05	0.00128653
ENST00000416918	ENSG00000171853	TRAPPC12	protein_coding	9.47911	3.99565e-06	0.000608531
ENST00000426877	ENSG00000181029	TRAPPC5	protein_coding	13.7011	3.62982e-06	0.000565211
ENST00000508798	ENSG00000168785	TSPAN5	protein_coding	7.59224	0.000446771	0.0227473
ENST00000613904	ENSG00000129696	TTI2	protein_coding	2.85956	0.000669831	0.030971
ENST00000460472	ENSG00000155657	TTN	protein_coding	8.7247	2.32681e-05	0.00225059
ENST00000409434	ENSG00000115514	TXNDC9	protein_coding	-3.46354	0.000549931	0.026954
ENST00000428595	ENSG00000143569	UBAP2L	protein_coding	-6.68232	1.89894e-05	0.00189479
ENST00000394801	ENSG00000109332	UBE2D3	protein_coding	8.91377	1.70143e-05	0.00175133
ENST00000588595	ENSG00000198258	UBL5	protein_coding	-4.40784	7.85254e-05	0.00578921
ENST00000337130	ENSG00000169764	UGP2	protein_coding	8.43146	0.000591245	0.0282011
ENST00000594724	ENSG00000053501	USE1	protein_coding	-12.519	6.94948e-07	0.000168751
ENST00000264904	ENSG00000138768	USO1	protein_coding	9.67402	9.01433e-06	0.00110216
ENST00000483667	ENSG00000172046	USP19	protein_coding	6.80611	0.000596317	0.0283263
ENST00000496518	ENSG00000123552	USP45	protein_coding	8.91651	1.40987e-05	0.00150173
ENST00000308271	ENSG00000090686	USP48	protein_coding	7.69127	0.000845113	0.0370527
ENST00000263864	ENSG00000118640	VAMP8	protein_coding	3.96663	0.000592721	0.0282103
ENST00000547997	ENSG00000028203	VEZT	protein_coding	5.73029	0.000204186	0.0123954
ENST00000392587	ENSG00000112290	WASF1	protein_coding	9.54216	8.44694e-07	0.000195125
ENST00000223023	ENSG00000106299	WASL	protein_coding	10.4164	1.4386e-06	0.000282226
ENST00000542471	ENSG00000176473	WDR25	protein_coding	7.13989	0.000576586	0.0278136
ENST00000407559	ENSG00000126870	WDR60	protein_coding	6.7691	1.46413e-05	0.00155475
ENST00000409644	ENSG00000167716	WDR81	protein_coding	14.6038	6.69798e-10	6.28596e-07
ENST00000423565	ENSG00000105875	WDR91	protein_coding	-11.1462	2.21545e-10	2.33119e-07
ENST00000585393	ENSG00000070540	WIPI1	protein_coding	8.5244	0.000101881	0.00700536
ENST00000190983	ENSG00000064205	WISP2	protein_coding	8.50456	3.44406e-05	0.00304128
ENST00000535698	ENSG00000060237	WNK1	protein_coding	5.52947	0.000971075	0.041323
ENST00000448232	ENSG00000151718	WWC2	protein_coding	8.16909	0.000503676	0.025163
ENST00000361842	ENSG00000132530	XAF1	protein_coding	25.4726	2.40087e-07	7.12545e-05
ENST00000457309	ENSG00000164924	YWHAZ	protein_coding	10.0245	4.17152e-06	0.000626281
ENST00000463847	ENSG00000156639	ZFAND3	protein_coding	11.7625	0.00101149	0.0424884
ENST00000620510	ENSG00000106261	ZKSCAN1	protein_coding	8.95344	0.000460728	0.0233894
ENST00000282869	ENSG00000152926	ZNF117	protein_coding	10.5639	3.30967e-06	0.000523556
ENST00000335870	ENSG00000170260	ZNF212	protein_coding	6.29782	1.15433e-05	0.00131852
ENST00000300823	ENSG00000167380	ZNF226	protein_coding	8.92127	2.90862e-05	0.00266488
ENST00000357328	ENSG00000198105	ZNF248	protein_coding	5.97262	0.000400655	0.0208269
ENST00000292530	ENSG00000160961	ZNF333	protein_coding	30.4418	2.13495e-12	6.73945e-09
ENST00000438182	ENSG00000198342	ZNF442	protein_coding	8.10781	0.000297524	0.0163469
ENST00000300849	ENSG00000167394	ZNF668	protein_coding	7.58482	2.60585e-06	0.000447948

## Sheet: ObCRC_Ob
Supplemental Data 4:GO and KEGG pathway enrichment analysis of DET in the diﬀerent comparisons
TranscriptRecID	EnsG	GeneSymbol	GeneType	logFC	PValue	FDR		Category	Term	Count	%	PValue	FDR	Genes
ENST00000327238	ENSG00000155229	MMS19	protein_coding	16.8327	3.68779e-16	2.88591e-12		GOTERM_BP_DIRECT	GO:0016032~viral process	26	4.40678	9.8198e-06	0.00045172	NACA, POLR2E, IL6ST, UNG, NUP93, PSMB5, DDX11, KLC1, RBCK1, RALA, NUP54, PIK3R1, DLG1, MPDZ, CREB1, CREBBP, ACKR3, MFGE8, SPEN, YWHAE, PDCL3, FYN, EIF4A1, MDM2, BIN1, C9ORF69
ENST00000324894	ENSG00000130299	GTPBP3	protein_coding	12.25	1.13981e-12	2.19882e-09		GOTERM_BP_DIRECT	GO:0001822~kidney development	11	1.86441	0.00037114	0.008533	TNS2, ASS1, SERPINF1, GATA3, ITGA8, TIPARP, PKD1, PYGO2, TET2, PPAT, MPST
ENST00000597620	ENSG00000079435	LIPE	protein_coding	14.2188	1.68879e-12	3.08639e-09		GOTERM_BP_DIRECT	GO:1900121~negative regulation of receptor binding	4	0.677966	0.000995213	0.0117714	ADIPOQ, ANXA2, ADAM15, B2M
ENST00000521015	ENSG00000134014	ELP3	protein_coding	11.8449	2.17782e-12	3.60108e-09		GOTERM_BP_DIRECT	GO:0098609~cell-cell adhesion	20	3.38983	0.0010236	0.0117714	COBLL1, CAST, DBNL, ZC3H15, TBC1D10A, EPS15L1, EIF2A, KLC2, RPS2, PPP1R13L, YWHAE, ANXA2, TMEM2, ATXN2L, CSNK1D, IST1, NOP56, CC2D1A, EHD1, EHD4
ENST00000480987	ENSG00000096746	HNRNPH3	protein_coding	11.363	3.92844e-12	5.93092e-09		GOTERM_BP_DIRECT	GO:0000398~mRNA splicing, via spliceosome	17	2.88136	0.00189625	0.0174455	SRSF1, POLR2E, CWC27, TRA2B, PTBP1, SPEN, U2AF1L4, HNRNPU, UBL5, HNRNPL, HNRNPM, HNRNPH3, GTF2F1, SRRM2, SNRNP35, CWC22, TXNL4A
ENST00000382952	ENSG00000159692	CTBP1	protein_coding	11.0744	4.63208e-12	6.70184e-09		GOTERM_BP_DIRECT	GO:0030097~hemopoiesis	8	1.35593	0.00247251	0.0189559	PDGFB, CRIP2, TAZ, NOTCH4, TIPARP, ROGDI, CD164, SOD2
ENST00000381022	ENSG00000107186	MPDZ	protein_coding	11.2453	6.8249e-12	8.77732e-09		GOTERM_BP_DIRECT	GO:0006281~DNA repair	17	2.88136	0.00331538	0.0217868	MMS19, REV1, PDS5B, UNG, TRIM28, CEP164, INTS3, ATRX, UBE2D3, XPC, CSNK1D, DDX11, RUVBL2, SLX1A, OGG1, PARP2, FANCC
ENST00000375425	ENSG00000204356	NELFE	protein_coding	11.8584	7.90921e-12	9.80855e-09		GOTERM_BP_DIRECT	GO:0010467~gene expression	7	1.18644	0.00382895	0.0218185	HNRNPL, HNRNPM, POLR2E, GTF2F1, PTBP1, EDA, HNRNPU
ENST00000558498	ENSG00000104043	ATP8B4	protein_coding	12.6303	3.46936e-11	3.27628e-08		GOTERM_BP_DIRECT	GO:0048745~smooth muscle tissue development	4	0.677966	0.00426884	0.0218185	ITGA8, NF1, TIPARP, DLG1
ENST00000496365	ENSG00000068438	FTSJ1	protein_coding	11.2085	3.49103e-11	3.27628e-08		GOTERM_BP_DIRECT	GO:0001525~angiogenesis	16	2.71186	0.004903	0.0225538	COL18A1, FGFR1, COL4A2, ACVRL1, ACKR3, MFGE8, ANXA2, PDCL3, TYMP, HOXA3, ITGAV, NOS3, HS6ST1, TNFSF12-TNFSF13, TMEM100, ADAM15
ENST00000262971	ENSG00000105229	PIAS4	protein_coding	9.72334	8.48264e-11	7.01312e-08		GOTERM_BP_DIRECT	GO:0006357~regulation of transcription from RNA polymerase II promoter	25	4.23729	0.00702356	0.0259298	LCORL, THRA, TADA3, RFXANK, PLAGL1, FOS, ZNF704, ATP2B4, HSF2, HSF4, SREBF1, ELP3, ZMYM2, ELP2, CREB1, PKN1, SAP18, ARID1A, AHR, SOD2, MED16, DMTF1, MED18, ZSCAN18, TBX19
ENST00000381278	ENSG00000128274	A4GALT	protein_coding	3.24464	1.85648e-10	1.4014e-07		GOTERM_BP_DIRECT	GO:0045116~protein neddylation	4	0.677966	0.00705964	0.0259298	DCUN1D1, DCUN1D2, UBA3, DCUN1D3
ENST00000596548	ENSG00000125730	C3	protein_coding	10.8436	2.052e-10	1.48445e-07		GOTERM_BP_DIRECT	GO:0006306~DNA methylation	5	0.847458	0.00732798	0.0259298	ATRX, FOS, MTA2, GNAS, HEMK1
ENST00000476228	ENSG00000114354	TFG	protein_coding	11.0511	2.36124e-10	1.63984e-07		GOTERM_BP_DIRECT	GO:0007595~lactation	6	1.01695	0.0099828	0.0293316	DDR1, PRLR, CREB1, NCOR2, PPAT, APRT
ENST00000395757	ENSG00000072310	SREBF1	protein_coding	2.13809	3.07492e-10	2.01459e-07		GOTERM_BP_DIRECT	GO:0016236~macroautophagy	8	1.35593	0.0100365	0.0293316	MFN2, MAP1LC3A, ATG14, PIK3C3, MLST8, OPTN, WIPI2, RRAGB
ENST00000342193	ENSG00000082438	COBLL1	protein_coding	10.2464	3.47542e-10	2.19419e-07		GOTERM_BP_DIRECT	GO:0032869~cellular response to insulin stimulus	8	1.35593	0.0107491	0.0293316	GCLC, SLC25A33, RHOQ, ADIPOQ, PIK3R1, PPAT, AKT2, APRT
ENST00000241463	ENSG00000122035	RASL11A	protein_coding	10.2364	3.7717e-10	2.31396e-07		GOTERM_BP_DIRECT	GO:0051289~protein homotetramerization	7	1.18644	0.0113875	0.0293316	HM13, ACACA, ACACB, PPAT, DCTPP1, DCXR, SOD2
ENST00000506581	ENSG00000163682	RPL9	protein_coding	8.71731	3.7984e-10	2.31396e-07		GOTERM_BP_DIRECT	GO:0043547~positive regulation of GTPase activity	29	4.91525	0.0127669	0.0293316	FGFR1, PDGFB, AGFG1, CYTH2, DENND2D, FAM13A, CCL20, RABGEF1, FGD5, AGAP1, EIF2B5, ARHGEF1, ARHGEF7, ARHGEF18, NF1, NCKAP1L, TRIO, ARHGEF9, DOCK8, P2RY12, CCL13, ARHGAP33, RASGRF2, SGSM2, FYN, CALM3, GNAS, DENND4B, SRGAP2
ENST00000369272	ENSG00000131781	FMO5	protein_coding	10.2592	3.93462e-10	2.35562e-07		GOTERM_BP_DIRECT	GO:0045893~positive regulation of transcription, DNA-templated	27	4.57627	0.012835	0.0293316	MMS19, SMARCAD1, PTGES2, ACVRL1, PDGFB, TADA3, GPBP1, GPBP1L1, XRCC6, FOS, GATA3, WAC, NFATC2, FBXW11, NFATC1, TAF8, CREB1, TRIM28, CREBBP, IGF1, SMAD2, ARID1A, FOXN3, AHR, MED16, NOTCH4, USP22
ENST00000534557	ENSG00000149823	VPS51	protein_coding	8.89399	5.10355e-10	2.9536e-07		GOTERM_BP_DIRECT	GO:0071156~regulation of cell cycle arrest	3	0.508475	0.0137083	0.0293316	SLC25A33, BIN1, AKT2
ENST00000433129	ENSG00000064687	ABCA7	protein_coding	11.3881	7.91037e-10	4.35999e-07		GOTERM_BP_DIRECT	GO:0046326~positive regulation of glucose import	5	0.847458	0.0140282	0.0293316	IGF1, RHOQ, ADIPOQ, PIK3R1, AKT2
ENST00000301149	ENSG00000167588	GPD1	protein_coding	8.23001	1.06753e-09	5.70293e-07		GOTERM_BP_DIRECT	GO:0055072~iron ion homeostasis	5	0.847458	0.0140282	0.0293316	EIF2AK1, FBXL5, STEAP1, SOD2, B2M
ENST00000596247	ENSG00000183207	RUVBL2	protein_coding	6.06203	1.1582e-09	6.0603e-07		GOTERM_BP_DIRECT	GO:0042493~response to drug	18	3.05085	0.0167048	0.0330379	COL18A1, SREBF1, ASS1, CREB1, NCKAP1L, ACACB, SOD2, ABCG2, B2M, FOS, XPC, FYN, GATA3, MDM2, GNAS, LOX, OGG1, NFATC2
ENST00000453996	ENSG00000174177	CTU2	protein_coding	11.0842	1.16934e-09	6.0603e-07		GOTERM_BP_DIRECT	GO:0009408~response to heat	6	1.01695	0.0172372	0.0330379	GCLC, MICA, IGF1, NOS3, DNAJB4, EIF2B5
ENST00000556572	ENSG00000087303	NID2	protein_coding	18.0292	1.37347e-09	6.62392e-07		GOTERM_BP_DIRECT	GO:0010544~negative regulation of platelet activation	3	0.508475	0.0245397	0.0445248	PDGFB, C1QTNF1, NOS3
ENST00000593812	ENSG00000127526	SLC35E1	protein_coding	10.0364	1.74866e-09	7.98955e-07		GOTERM_BP_DIRECT	GO:0051056~regulation of small GTPase mediated signal transduction	10	1.69492	0.0262695	0.0445248	RALGAPA1, ARHGAP33, RASGRF2, ARHGEF7, ARHGEF18, TRIO, RHOQ, ARHGEF9, FAM13A, SRGAP2
ENST00000409836	ENSG00000136732	GYPC	protein_coding	6.51575	2.78223e-09	1.16398e-06		GOTERM_BP_DIRECT	GO:0007179~transforming growth factor beta receptor signaling pathway	8	1.35593	0.0262803	0.0445248	FOS, ACVRL1, PDGFB, LTBP2, ARHGEF18, CREB1, PML, SMAD2
ENST00000367483	ENSG00000116690	PRG4	protein_coding	8.29621	3.05125e-09	1.24649e-06		GOTERM_BP_DIRECT	GO:0009791~post-embryonic development	7	1.18644	0.02758	0.0445248	GATA3, TIPARP, PYGO2, SMAD2, TET2, PPP1R13L, SOD2
ENST00000494852	ENSG00000134871	COL4A2	protein_coding	9.77796	3.75258e-09	1.4641e-06		GOTERM_BP_DIRECT	GO:0010629~negative regulation of gene expression	10	1.69492	0.0297397	0.0445248	ACVRL1, PDGFB, SERPINF1, FYN, CREB1, TIPARP, NDFIP2, SMAD2, ACACB, MIF
ENST00000352480	ENSG00000130707	ASS1	protein_coding	9.27998	4.70589e-09	1.75707e-06		GOTERM_BP_DIRECT	GO:0002098~tRNA wobble uridine modification	3	0.508475	0.0309002	0.0445248	ELP3, GTPBP3, CTU2
ENST00000401000	ENSG00000163125	RPRD2	protein_coding	11.643	6.06464e-09	2.14886e-06		GOTERM_BP_DIRECT	GO:0034976~response to endoplasmic reticulum stress	7	1.18644	0.0309737	0.0445248	P4HB, HSP90B1, SRPX, UBE4B, TMEM259, PIK3R1, EIF2B5
ENST00000538492	ENSG00000197562	RAB40C	protein_coding	10.6133	7.41584e-09	2.54958e-06		GOTERM_BP_DIRECT	GO:1900034~regulation of cellular response to heat	7	1.18644	0.0309737	0.0445248	BAG1, CREBBP, NUP93, MLST8, NUP54, YWHAE, CCAR2
ENST00000341744	ENSG00000124225	PMEPA1	protein_coding	8.09648	9.13157e-09	3.01986e-06		GOTERM_BP_DIRECT	GO:0008360~regulation of cell shape	10	1.69492	0.0335183	0.0456875	PALM, CCL13, PALM2-AKAP2, CSNK1D, C21ORF2, FYN, ARHGEF18, RHOQ, FGD5, DLG1
ENST00000439924	ENSG00000182149	IST1	protein_coding	9.81604	1.01741e-08	3.27116e-06		GOTERM_BP_DIRECT	GO:0006396~RNA processing	8	1.35593	0.033769	0.0456875	HNRNPL, HNRNPH3, SUGP2, TRMT2B, PABPC4, DHX36, RBM39, HNRNPU
ENST00000379070	ENSG00000101290	CDS2	protein_coding	7.68122	1.21171e-08	3.75674e-06		GOTERM_BP_DIRECT	GO:0016055~Wnt signaling pathway	12	2.0339	0.0353482	0.0464576	CSNK1D, PIAS4, CSNK2B, LEO1, CTNND1, PYGO2, RNF138, APCDD1, FBXW11, CCAR2, MARK1, BCL7B
ENST00000309733	ENSG00000174749	C4orf32	protein_coding	7.70325	1.23901e-08	3.77399e-06		GOTERM_BP_DIRECT	GO:0051639~actin filament network formation	3	0.508475	0.0378306	0.0473473	COBLL1, FHOD3, ACTN1
ENST00000334668	ENSG00000204642	HLA-F	protein_coding	8.14167	1.42223e-08	4.15004e-06		GOTERM_BP_DIRECT	GO:0035023~regulation of Rho protein signal transduction	7	1.18644	0.0427466	0.0473473	ARHGEF1, RASGRF2, ARHGEF7, ARHGEF18, TRIO, ARHGEF9, FGD5
ENST00000594001	ENSG00000105402	NAPA	protein_coding	9.4024	1.46954e-08	4.24075e-06		GOTERM_BP_DIRECT	GO:0046686~response to cadmium ion	4	0.677966	0.042969	0.0473473	GCLC, SPARC, SOD2, B2M
ENST00000223215	ENSG00000106484	MEST	protein_coding	9.02754	1.47774e-08	4.24075e-06		GOTERM_BP_DIRECT	GO:0002576~platelet degranulation	8	1.35593	0.0444767	0.0473473	CD9, LGALS3BP, PDGFB, CALM3, IGF1, ACTN1, SERPING1, SPARC
ENST00000471538	ENSG00000065526	SPEN	protein_coding	10.666	1.49813e-08	4.26401e-06		GOTERM_BP_DIRECT	GO:0050731~positive regulation of peptidyl-tyrosine phosphorylation	7	1.18644	0.0449472	0.0473473	CSF3, PDGFB, IGF1, MLST8, ADIPOQ, EHD4, MIF
ENST00000376568	ENSG00000204580	DDR1	protein_coding	7.57561	1.65356e-08	4.59344e-06		GOTERM_BP_DIRECT	GO:0050852~T cell receptor signaling pathway	10	1.69492	0.045183	0.0473473	FYB, PSMB5, PSMD11, FYN, GATA3, RBCK1, HLA-DPB1, UBE2D1, FBXW11, PIK3R1
ENST00000376817	ENSG00000204628	GNB2L1	protein_coding	8.70452	2.71192e-08	7.13398e-06		GOTERM_BP_DIRECT	GO:0034497~protein localization to pre-autophagosomal structure	3	0.508475	0.0452887	0.0473473	MFN2, PIK3C3, WIPI2
ENST00000370177	ENSG00000125534	PPDPF	protein_coding	7.5062	2.8175e-08	7.31595e-06		GOTERM_BP_DIRECT	GO:0032206~positive regulation of telomere maintenance	3	0.508475	0.0452887	0.0473473	ATRX, PML, DHX36
ENST00000485290	ENSG00000134452	FBXO18	protein_coding	9.25086	2.82323e-08	7.31595e-06		GOTERM_BP_DIRECT	GO:0031065~positive regulation of histone deacetylation	3	0.508475	0.0452887	0.0473473	SREBF1, CTBP1, PML
ENST00000293826	ENSG00000248871	TNFSF12-TNFSF13	protein_coding	9.47955	3.68486e-08	9.1395e-06		GOTERM_BP_DIRECT	GO:2001238~positive regulation of extrinsic apoptotic signaling pathway	4	0.677966	0.0474718	0.0485267	TNFSF10, PML, RBCK1, TNFSF12-TNFSF13
ENST00000265080	ENSG00000113319	RASGRF2	protein_coding	9.99169	4.91566e-08	1.17718e-05		GOTERM_BP_DIRECT	GO:0032508~DNA duplex unwinding	5	0.847458	0.0493483	0.0493483	ATRX, DDX11, FBXO18, XRCC6, RUVBL2
ENST00000420584	ENSG00000064995	TAF11	protein_coding	9.74999	5.0704e-08	1.19772e-05
ENST00000396009	ENSG00000101096	NFATC2	protein_coding	9.43057	5.96208e-08	1.38018e-05		Category	Term	Count	%	PValue	FDR	Genes
ENST00000545796	ENSG00000131196	NFATC1	protein_coding	10.0623	6.37687e-08	1.45678e-05		GOTERM_MF_DIRECT	GO:0005515~protein binding	356	60.339	1.42254e-11	2.84e-10	LDHB, HM13, SEC31A, LTBP2, IL6ST, PPP2R5D, TRMT2B, XRCC6, LDHD, PPP2R5C, CD53, INTS3, VPS51, SLC35A3, B2M, ACTG1, N4BP2L2, ATP2B4, DDX11, ATXN10, HOMER3, PIK3C3, INSIG1, AAGAB, RAB24, DHX36, JAGN1, S100A1, CCAR2, BCL7B, EIF2B5, DBNL, ZC3HC1, GTPBP3, MYH1, RPUSD3, MPDZ, VPS45, PTBP1, EXD2, SERPING1, OPTN, NCAPD2, TRAPPC12, RPS18, PGLS, DCAF8, HUWE1, SERPINF1, PIAS4, MED16, MED18, FBXL5, RPS13, LRC…
ENST00000253457	ENSG00000131148	EMC8	protein_coding	9.41894	6.90391e-08	1.5567e-05		GOTERM_MF_DIRECT	GO:0098641~cadherin binding involved in cell-cell adhesion	22	3.72881	0.000412036	0.00412	COBLL1, CAST, DBNL, ZC3H15, TBC1D10A, CTNND1, EPS15L1, EIF2A, KLC2, RPS2, PPP1R13L, YWHAE, ANXA2, TMEM2, ATXN2L, CSNK1D, IST1, NOP56, CC2D1A, EHD1, DLG1, EHD4
ENST00000265149	ENSG00000168769	TET2	protein_coding	9.05169	7.22313e-08	1.61817e-05		GOTERM_MF_DIRECT	GO:0044822~poly(A) RNA binding	56	9.49153	0.0010514	0.00526658	CAST, SRSF1, XRCC6, RPS2, MRPS30, SRRM2, TPT1, DHX36, CCAR2, ARHGEF1, SSBP1, RPUSD3, PTBP1, SPEN, HNRNPU, SARS2, TRAP1, RPS18, LARP4, HUWE1, RPS17, EIF4A1, RPS13, CDK11B, RBM39, MYBBP1A, MRPL43, GLTSCR2, ASS1, STRAP, TRA2B, PABPC4, HADHB, HNRNPL, HNRNPM, ATXN2L, DDX49, CSDE1, NSA2, P4HB, ZC3H15, TRIM28, SAP18, RPS9, ANKHD1, YWHAE, CAPRIN1, ANXA2, HNRNPH3, SUGP2, SON, GTF2F1, DDX50, NOP56, NELFE, …
ENST00000523562	ENSG00000102878	HSF4	protein_coding	9.32627	7.95428e-08	1.75926e-05		GOTERM_MF_DIRECT	GO:0005524~ATP binding	70	11.8644	0.00105332	0.00526658	ADCY3, ACVRL1, HELQ, XRCC6, TTLL5, DSTYK, ACTG1, NLRC5, ATP2B4, DDX11, NUBP2, PIK3C3, DHX36, ATP8B4, AKT2, MYH1, PKN1, PKDCC, SARS2, IQCA1, MARK1, HNRNPU, TBCK, WEE1, PANK4, TRAP1, DDR1, KIF1B, EIF2AK1, ATP2C1, FBXO18, EIF4A1, CDK11B, RUVBL2, NAIP, SMARCAD1, ABCA8, COASY, ABCA7, FGFR1, GCLC, ASS1, PFKFB3, NEK1, SKIV2L, CTPS2, ASNS, NAGK, IARS, UBE2D3, DDX49, UBE2D1, EHD1, EHD4, PDS5B, UBE4B, ACAC…
ENST00000597296	ENSG00000186230	ZNF749	protein_coding	10.3016	8.34972e-08	1.83504e-05		GOTERM_MF_DIRECT	GO:0016922~ligand-dependent nuclear receptor binding	5	0.847458	0.00393873	0.0157549	TADA3, UBA3, ARID1A, NCOR2, C1D
ENST00000520687	ENSG00000113140	SPARC	protein_coding	8.97615	8.64959e-08	1.88339e-05		GOTERM_MF_DIRECT	GO:0004386~helicase activity	9	1.52542	0.00560567	0.0186856	ATRX, SMARCAD1, HELQ, DDX11, SKIV2L, FBXO18, EIF4A1, DDX50, DHX36
ENST00000443462	ENSG00000138674	SEC31A	protein_coding	6.81817	8.78738e-08	1.89524e-05		GOTERM_MF_DIRECT	GO:0035326~enhancer binding	4	0.677966	0.00896767	0.0256219	TIPARP, SMAD2, AHR, HNRNPU
ENST00000579852	ENSG00000108342	CSF3	protein_coding	8.9364	8.87095e-08	1.90145e-05		GOTERM_MF_DIRECT	GO:0005085~guanyl-nucleotide exchange factor activity	10	1.69492	0.0130486	0.027682	P2RY12, RASGRF2, ARHGEF7, TBC1D10A, ARHGEF18, TRIO, DOCK8, ARHGEF9, FGD5, EIF2B5
ENST00000354124	ENSG00000173918	C1QTNF1	protein_coding	10.1329	9.37391e-08	1.97273e-05		GOTERM_MF_DIRECT	GO:0032182~ubiquitin-like protein binding	3	0.508475	0.0139158	0.027682	DCUN1D1, DCUN1D2, DCUN1D3
ENST00000509137	ENSG00000161243	FBXO27	protein_coding	8.71472	9.67801e-08	2.02445e-05		GOTERM_MF_DIRECT	GO:0000166~nucleotide binding	20	3.38983	0.0160473	0.027682	SRSF1, ADCY3, MOCS2, ENOX2, TRA2B, PABPC4, PTBP1, SPEN, U2AF1L4, HNRNPL, HNRNPM, ITPA, HNRNPH3, LARP4, NUBP2, AKAP7, SNRNP35, RBM39, NELFE, CYR61
ENST00000554259	ENSG00000174373	RALGAPA1	protein_coding	8.21478	9.78041e-08	2.03362e-05		GOTERM_MF_DIRECT	GO:0031624~ubiquitin conjugating enzyme binding	5	0.847458	0.0161302	0.027682	ZMYM2, DCUN1D1, DCUN1D2, RNF138, DCUN1D3
ENST00000310496	ENSG00000169733	RFNG	protein_coding	8.02459	1.19132e-07	2.42963e-05		GOTERM_MF_DIRECT	GO:0003723~RNA binding	28	4.74576	0.0166092	0.027682	SRSF1, AGFG1, SKIV2L, PABPC4, RPS2, HNRNPL, HNRNPM, DDX11, C19ORF66, RPL9, RPUSD3, PTBP1, ANKHD1, U2AF1L4, CAPRIN1, HNRNPU, IFIT3, RPS18, SON, SUGP2, HSP90B1, HNRNPH3, DDX50, NOP56, RBM39, CWC22, NELFE, C1D
ENST00000374907	ENSG00000138448	ITGAV	protein_coding	10.5517	1.24576e-07	2.51498e-05		GOTERM_MF_DIRECT	GO:0008429~phosphatidylethanolamine binding	3	0.508475	0.0249029	0.0383122	MAP1LC3A, NF1, MFGE8
ENST00000253115	ENSG00000130818	ZNF426	protein_coding	9.9082	1.27459e-07	2.55832e-05		GOTERM_MF_DIRECT	GO:0000993~RNA polymerase II core binding	4	0.677966	0.0278043	0.0397204	ELP3, ELP2, WAC, CCAR2
ENST00000287936	ENSG00000113161	HMGCR	protein_coding	11.3968	1.30676e-07	2.60093e-05		GOTERM_MF_DIRECT	GO:0019901~protein kinase binding	20	3.38983	0.0323551	0.0431401	SREBF1, KIZ, ELP2, ACVRL1, ZC3HC1, ARHGEF7, PPP1R12B, CTNND1, TRAP1, RPS18, RPS6KA3, TOM1L1, TBC1D14, PKD1, CALM3, RNF138, AKAP7, LIPE, HDAC7, DLG1
ENST00000378533	ENSG00000101955	SRPX	protein_coding	9.81384	1.48632e-07	2.85143e-05		GOTERM_MF_DIRECT	GO:0005089~Rho guanyl-nucleotide exchange factor activity	7	1.18644	0.035773	0.0447162	ARHGEF1, RASGRF2, ARHGEF7, ARHGEF18, TRIO, ARHGEF9, FGD5
ENST00000511044	ENSG00000156453	PCDH1	protein_coding	9.03327	1.50073e-07	2.86327e-05		GOTERM_MF_DIRECT	GO:0005525~GTP binding	20	3.38983	0.0389246	0.0457936	GPN1, GTPBP3, RAB40C, RHOQ, PCK2, RRAGB, MFN2, RASL11A, RAB28, RAB24, RALA, GNAS, RAB38, AGAP1, EHD1, C9ORF69, GBP2, MOCS1, ARL4A, EHD4
ENST00000397386	ENSG00000071282	LMCD1	protein_coding	11.4922	1.65777e-07	3.09487e-05		GOTERM_MF_DIRECT	GO:0005518~collagen binding	6	1.01695	0.041725	0.046054	DDR1, PDGFB, C1QTNF1, NID2, SPARC, PCOLCE2
ENST00000396664	ENSG00000122644	ARL4A	protein_coding	13.9097	1.66835e-07	3.09796e-05		GOTERM_MF_DIRECT	GO:0051539~4 iron, 4 sulfur cluster binding	5	0.847458	0.0437513	0.046054	DDX11, ACO2, NUBP2, PPAT, MOCS1
ENST00000397260	ENSG00000092096	SLC22A17	protein_coding	9.9334	1.89662e-07	3.46651e-05		GOTERM_MF_DIRECT	GO:0003684~damaged DNA binding	6	1.01695	0.0497684	0.0497684	REV1, XPC, UNG, XRCC6, CREBBP, OGG1
ENST00000513873	ENSG00000080822	CLDND1	protein_coding	8.80502	1.89678e-07	3.46651e-05
ENST00000593795	ENSG00000064607	SUGP2	protein_coding	9.39408	2.16996e-07	3.92446e-05		Category	Term	Count	%	PValue	FDR	Genes
ENST00000392249	ENSG00000082146	STRADB	protein_coding	10.1697	2.25854e-07	4.04363e-05		GOTERM_CC_DIRECT	GO:0005654~nucleoplasm	152	25.7627	1.07008e-12	2.247e-11	MMS19, THRA, PPP2R5D, PPP2R5C, XRCC6, TIRAP, INTS3, DDX11, GATA3, SRRM2, AAGAB, MLST8, CCAR2, MTA2, PTBP1, ARID1A, OPTN, PTPDC1, AHR, WEE1, HNRNPU, NCAPD2, RPS18, HUWE1, PIAS4, RPS17, MED16, PYGO2, RPS13, MYBBP1A, GPN1, SIVA1, PALM, COASY, SSH1, TADA3, PFKFB3, DUSP10, CEP164, PLAGL1, HNRNPL, PSMB5, HNRNPM, UBE2D3, HOXA3, DDX49, LEO1, SNRNP35, RCHY1, UBE2D1, SPOP, SREBF1, UAP1, TAF8, CREBBP, SRA1,…
ENST00000221222	ENSG00000051128	HOMER3	protein_coding	9.92447	2.25914e-07	4.04363e-05		GOTERM_CC_DIRECT	GO:0005829~cytosol	156	26.4407	3.31152e-08	3.4755e-07	CAST, LDHB, THRA, SEC31A, PPP2R5D, PPP2R5C, XRCC6, TIRAP, DSTYK, PGAM2, ADH1B, VPS51, OGDH, ACTG1, NLRC5, HOMER3, ATXN10, TBC1D14, PIK3C3, AAGAB, RBCK1, RAB24, DHX36, MLST8, DCTPP1, EIF2B5, DBNL, C2CD2, TAZ, ACTN1, PNPLA2, OPTN, NCAPD2, RPS18, PGLS, HUWE1, RASGRF2, RPS17, RPS13, AKAP7, RNF135, GBP2, MPST, FGFR1, GCLC, ASS1, STRAP, PFKFB3, CTPS2, CEP164, NAPA, NAGK, SESN1, PPAT, RRAGB, PSMB5, UBE2…
ENST00000595669	ENSG00000161677	JOSD2	protein_coding	8.92105	2.36944e-07	4.2193e-05		GOTERM_CC_DIRECT	GO:0016020~membrane	107	18.1356	2.45597e-06	1.722e-05	ADCY3, CAST, MMS19, LDHB, HM13, PDGFB, IL6ST, XRCC6, VPS51, NFXL1, B2M, ACTG1, ATP2B4, ATXN10, PIK3C3, RAB24, MTA2, PTBP1, PNPLA2, MFGE8, HNRNPU, HLA-F, NCAPD2, MGAT1, RPS18, HUWE1, RPS17, MED16, ATP2C1, RPS13, EDA, BIN1, MYBBP1A, PALM, NAPA, HNRNPL, HNRNPM, LGALS3BP, ITGAV, RPL9, HLA-DPB1, PALM2-AKAP2, NCKAP1L, RPS9, RFNG, DOCK8, WIPI2, DDX50, NSMF, PLA2G4C, NCOR2, TM7SF2, GYPC, ACVRL1, EPS15L1,…
ENST00000432329	ENSG00000118260	CREB1	protein_coding	5.73476	2.42266e-07	4.29206e-05		GOTERM_CC_DIRECT	GO:0031012~extracellular matrix	25	4.23729	1.97047e-05	0.000103425	COL18A1, P4HB, COL4A2, LTBP2, PDGFB, CRIP2, LMCD1, LMNA, MFGE8, NID2, HNRNPU, ANXA2, ACTG1, HNRNPM, LGALS3BP, RPS18, HSP90B1, SERPINF1, RPS17, RPL9, EIF4A1, COL12A1, RPS13, ATP5O, CYR61
ENST00000382870	ENSG00000121741	ZMYM2	protein_coding	9.37677	2.52268e-07	4.44657e-05		GOTERM_CC_DIRECT	GO:0005737~cytoplasm	205	34.7458	7.37369e-05	0.00030954	ADCY3, LDHB, SEC31A, XRCC6, B2M, MEDAG, DDX11, HOMER3, RAB28, ATXN10, AIF1L, AAGAB, DHX36, CCAR2, EIF2B5, DBNL, MPDZ, HCFC1R1, EXD2, OPTN, PTPDC1, SARS2, MARK1, NCAPD2, EIF2AK1, DCAF8, PIAS4, HUWE1, BIN1, MYBBP1A, SIVA1, PALM, COASY, NEK1, PABPC4, DUSP10, AFAP1L1, DENND2D, METTL23, RCHY1, SPOP, UAP1, ZC3H15, MOCS2, SRA1, CREBBP, ACACA, NOTCH2NL, RPS9, NDFIP2, SMAD2, KLHDC8B, U2AF1L4, DMTF1, HEBP2…
ENST00000599668	ENSG00000125730	C3	protein_coding	6.87138	2.5451e-07	4.46344e-05		GOTERM_CC_DIRECT	GO:0070062~extracellular exosome	122	20.678	8.94286e-05	0.0003129	LDHB, LTBP2, IL6ST, LGMN, PGAM2, CD53, B2M, ACTG1, N4BP2L2, DDX11, TPT1, AIF1L, RALA, COL12A1, DHX36, ITFG1, TMEM205, DBNL, PTBP1, ACTN1, TMEM132A, SERPING1, MFGE8, PCOLCE2, MGAT1, RPS18, PGLS, SERPINF1, HUWE1, RPS17, RPS13, MPST, COASY, ASS1, NAPA, NAGK, HADHB, PSMB5, HNRNPL, HNRNPM, UBE2D3, LGALS3BP, ITGAV, MEST, COL18A1, GPD1, P4HB, MOCS2, TBC1D10A, ACACA, NCKAP1L, RPS9, RFNG, TNFSF10, HEBP2, …
ENST00000215770	ENSG00000099974	DDTL	protein_coding	8.64545	2.59732e-07	4.53213e-05		GOTERM_CC_DIRECT	GO:0005634~nucleus	206	34.9153	0.000467286	0.001401	PPP2R5D, PPP2R5C, XRCC6, PGAM2, INTS3, ACTG1, N4BP2L2, DDX11, DHX36, CCAR2, ZNF391, S100A1, EIF2B5, GTPBP3, ZC3HC1, PTBP1, HCFC1R1, EXD2, OPTN, PTPDC1, NCAPD2, TRAPPC12, RPS18, DCAF8, PIAS4, HUWE1, MED16, RPS13, MYBBP1A, PALM, TADA3, GPBP1L1, NEK1, PABPC4, DUSP10, AFAP1L1, ZNF513, PLAGL1, RCHY1, SNRNP35, SPOP, MOCS1, MOCS2, SRA1, CREBBP, RPS9, SMAD2, ACACB, ABCG2, PAXIP1, DMTF1, NOTCH4, UBA3, YBE…
ENST00000356644	ENSG00000080546	SESN1	protein_coding	9.44368	3.0361e-07	5.14271e-05		GOTERM_CC_DIRECT	GO:0005913~cell-cell adherens junction	22	3.72881	0.00124703	0.00327345	COBLL1, CAST, DBNL, ZC3H15, TBC1D10A, CTNND1, EPS15L1, EIF2A, KLC2, RPS2, PPP1R13L, YWHAE, ANXA2, TMEM2, ATXN2L, CSNK1D, IST1, NOP56, CC2D1A, EHD1, DLG1, EHD4
ENST00000268314	ENSG00000140691	ARMC5	protein_coding	8.30122	3.09017e-07	5.20889e-05		GOTERM_CC_DIRECT	GO:0016363~nuclear matrix	10	1.69492	0.00323038	0.0071738	SMARCAD1, HNRNPM, PAXIP1, PIAS4, PML, RUVBL2, NSMF, SPARC, OGG1, NCOR2
ENST00000513665	ENSG00000157510	AFAP1L1	protein_coding	9.37648	3.13397e-07	5.2572e-05		GOTERM_CC_DIRECT	GO:0000139~Golgi membrane	32	5.42373	0.0034161	0.0071738	ABCA7, GALNT1, PTGES2, SEC31A, CLSTN2, PDGFB, TFG, CYTH2, NAPA, SLC35A3, B2M, ST6GALNAC6, PKD1, AP3D1, NOS3, HS6ST1, HLA-DPB1, SREBF1, DBNL, VPS45, TMEM132A, NDFIP2, OPTN, C6ORF89, HLA-F, MGAT1, CSNK1D, ATP2C1, NOTCH4, PSEN2, PMEPA1, GBP2
ENST00000555365	ENSG00000100445	SDR39U1	protein_coding	2.38065	3.45853e-07	5.77375e-05		GOTERM_CC_DIRECT	GO:0030496~midbody	11	1.86441	0.00707628	0.0135093	HSP90B1, SSH1, DDX11, IST1, PIK3C3, SPG20, CTNND1, PKN1, RALA, C6ORF89, ANXA2
ENST00000523338	ENSG00000145901	TNIP1	protein_coding	7.8698	3.49972e-07	5.81236e-05		GOTERM_CC_DIRECT	GO:0009986~cell surface	28	4.74576	0.0113062	0.0197859	ABCA7, HM13, ACVRL1, MICA, CLSTN2, PDGFB, RER1, CD53, MIF, SRPX, ITGAV, RALA, PKD1, CLDND1, HLA-DPB1, ACKR3, SPARC, ADIPOQ, HNRNPU, ANXA2, HLA-F, P2RY12, PRLR, ITGA8, NOTCH4, NLGN4X, IGSF3, ADAM15
ENST00000487179	ENSG00000244693	CTAGE8	protein_coding	8.44931	4.13783e-07	6.71412e-05		GOTERM_CC_DIRECT	GO:0005739~mitochondrion	57	9.66102	0.0129686	0.0209493	LDHB, MRPS34, PTGES2, CMC1, AGTPBP1, TRMT2B, LDHD, OGDH, MRPS30, HIBADH, MSRA, C7ORF55-LUC7L2, CTU2, RAB24, ATP5O, HEMK1, GTPBP3, ACO2, SSBP1, RPUSD3, TAZ, SARS2, ACADVL, MFN2, TRAP1, EMC8, ALDH7A1, KIF1B, MPST, GPN1, SIVA1, UNG, CTPS2, CHCHD6, HADHB, MGME1, GPD1, AMACR, ACACA, NDFIP2, ACACB, SPARC, PCK2, YWHAE, SOD2, IFIT3, P2RY12, SDHA, C21ORF2, OXLD1, FYN, HEBP2, YBEY, RAB38, USP48, OGG1, SCP2
ENST00000331925	ENSG00000184009	ACTG1	protein_coding	6.63614	4.35687e-07	6.97179e-05		GOTERM_CC_DIRECT	GO:0005776~autophagosome	7	1.18644	0.0144145	0.0216218	SRPX, MAP1LC3A, ATG14, TBC1D14, RAB24, OPTN, WIPI2
ENST00000400337	ENSG00000182871	COL18A1	protein_coding	11.1249	5.66122e-07	8.73689e-05		GOTERM_CC_DIRECT	GO:0022627~cytosolic small ribosomal subunit	6	1.01695	0.0163093	0.022833	RPS18, RPS17, RPS13, RPS9, EIF2A, RPS2
ENST00000369683	ENSG00000108039	XPNPEP1	protein_coding	6.41369	6.00961e-07	9.15254e-05		GOTERM_CC_DIRECT	GO:0000151~ubiquitin ligase complex	9	1.52542	0.0194959	0.0255884	DCUN1D1, DCUN1D2, MED18, UBE4B, FBXL5, RCHY1, UBE2D1, DCUN1D3, FBXW11
ENST00000400919	ENSG00000162585	C1orf86	protein_coding	4.6707	6.71751e-07	0.000100543		GOTERM_CC_DIRECT	GO:0016607~nuclear speck	13	2.20339	0.0237159	0.0292961	SRSF1, LMNA, SAP18, U2AF1L4, SON, ATXN2L, SRRM2, WAC, RBM39, RCHY1, OGG1, CWC22, SPOP
ENST00000491994	ENSG00000204351	SKIV2L	protein_coding	8.23958	6.81658e-07	0.000101588		GOTERM_CC_DIRECT	GO:0017053~transcriptional repressor complex	6	1.01695	0.0278025	0.0324362	N4BP2L2, ELP2, CTBP1, SPEN, NCOR2, C1D
ENST00000557450	ENSG00000126214	KLC1	protein_coding	11.6481	6.92406e-07	0.000102748		GOTERM_CC_DIRECT	GO:0048471~perinuclear region of cytoplasm	29	4.91525	0.0325168	0.0359396	GALNT1, PTGES2, SEC31A, TRA2B, RAB40C, ATXN10, HECTD3, TMEM100, EHD1, MT1G, EHD4, DLG1, TAF8, LMNA, NDFIP2, ACKR3, OPTN, ANXA2, HSP90B1, CSNK1D, SERPINF1, GNB2, PSEN2, FBXL5, GNAS, TNFSF12-TNFSF13, DCUN1D3, SELE, GBP2
ENST00000586237	ENSG00000123143	PKN1	protein_coding	8.17766	8.33889e-07	0.000117231		GOTERM_CC_DIRECT	GO:0005925~focal adhesion	20	3.38983	0.0378468	0.0397391	P4HB, ARHGEF7, ACTN1, RPS9, RPS2, YWHAE, B2M, ACTG1, CD9, RPS18, HSP90B1, TNS2, GNB2, RPS17, ITGAV, RPL9, ITGA8, AIF1L, RALA, RPS13
ENST00000251303	ENSG00000132207	SLX1A	protein_coding	7.88587	8.78312e-07	0.000121994		GOTERM_CC_DIRECT	GO:0043209~myelin sheath	10	1.69492	0.0482875	0.0482875	SDHA, ACTG1, LDHB, GNB2, ACO2, RALA, NAPA, EHD1, SOD2, MIF
ENST00000426997	ENSG00000237651	C2orf74	protein_coding	9.15036	9.59878e-07	0.000132265
ENST00000542471	ENSG00000176473	WDR25	protein_coding	7.80849	9.8538e-07	0.00013471		Category	Term	Count	%	PValue	FDR	Genes
ENST00000353979	ENSG00000171307	ZDHHC16	protein_coding	6.76991	1.06891e-06	0.000144423		KEGG_PATHWAY	hsa04152:AMPK signaling pathway	14	2.37288	0.000451646	0.005424	SREBF1, PFKFB3, HMGCR, CREB1, PPP2R5D, PPP2R5C, ACACA, IGF1, STRADB, PCK2, ADIPOQ, LIPE, PIK3R1, AKT2
ENST00000462630	ENSG00000101361	NOP56	protein_coding	6.00397	1.13725e-06	0.000151408		KEGG_PATHWAY	hsa00620:Pyruvate metabolism	7	1.18644	0.00294033	0.017642	LDHB, ALDH7A1, LDHD, ACACA, ALDH2, ACACB, PCK2
ENST00000588328	ENSG00000124299	PEPD	protein_coding	4.88974	1.16404e-06	0.000154276		KEGG_PATHWAY	hsa04122:Sulfur relay system	4	0.677966	0.00470112	0.0188045	MOCS2, CTU2, MOCS1, MPST
ENST00000380909	ENSG00000170638	TRABD	protein_coding	6.62028	1.21246e-06	0.000158812		KEGG_PATHWAY	hsa04915:Estrogen signaling pathway	10	1.69492	0.00956044	0.0201824	ADCY3, FOS, HSP90B1, FKBP5, CREB1, CALM3, NOS3, GNAS, PIK3R1, AKT2
ENST00000560229	ENSG00000182774	RPS17	protein_coding	8.75529	1.25945e-06	0.000163184		KEGG_PATHWAY	hsa04922:Glucagon signaling pathway	10	1.69492	0.00956044	0.0201824	LDHB, CREB1, CREBBP, ACACA, CALM3, PGAM2, GNAS, ACACB, PCK2, AKT2
ENST00000538259	ENSG00000182809	CRIP2	protein_coding	8.65032	1.4178e-06	0.000183018		KEGG_PATHWAY	hsa01130:Biosynthesis of antibiotics	16	2.71186	0.0100912	0.0201824	TM7SF2, LDHB, UAP1, ASS1, ACO2, HMGCR, PGAM2, OGDH, PCK2, PPAT, HADHB, SDHA, PGLS, ALDH7A1, ALDH2, UGP2
ENST00000468404	ENSG00000013374	NUB1	protein_coding	5.75314	1.44879e-06	0.000185637		KEGG_PATHWAY	hsa04520:Adherens junction	8	1.35593	0.0140978	0.0213313	ACTG1, FGFR1, FYN, CREBBP, CSNK2B, CTNND1, ACTN1, SMAD2
ENST00000280699	ENSG00000151092	NGLY1	protein_coding	6.12898	1.49483e-06	0.000190134		KEGG_PATHWAY	hsa05215:Prostate cancer	9	1.52542	0.0142209	0.0213313	FGFR1, HSP90B1, PDGFB, CREB1, CREBBP, MDM2, IGF1, PIK3R1, AKT2
ENST00000613488	ENSG00000275993	CH507-42P11.8	protein_coding	13.099	1.50493e-06	0.000190618		KEGG_PATHWAY	hsa04151:PI3K-Akt signaling pathway	21	3.55932	0.0254121	0.0338828	CSF3, FGFR1, COL4A2, PDGFB, CREB1, PPP2R5D, PPP2R5C, IGF1, PKN1, PCK2, YWHAE, HSP90B1, GNB2, PRLR, ITGAV, ITGA8, MDM2, NOS3, MLST8, PIK3R1, AKT2
ENST00000261978	ENSG00000119681	LTBP2	protein_coding	6.99856	1.50962e-06	0.000190618		KEGG_PATHWAY	hsa04330:Notch signaling pathway	6	1.01695	0.0291727	0.0350073	CTBP1, PSEN2, NOTCH4, CREBBP, RFNG, NCOR2
ENST00000374553	ENSG00000158813	EDA	protein_coding	3.69833	1.70878e-06	0.000212673		KEGG_PATHWAY	hsa05169:Epstein-Barr virus infection	13	2.20339	0.0434797	0.0465234	EIF2AK1, POLR2E, PSMD11, CREBBP, CSNK2B, MDM2, PTMA, YWHAE, NCOR2, PIK3R1, POLR2J3, AKT2, HLA-F
ENST00000288078	ENSG00000157353	FUK	protein_coding	6.69725	1.79292e-06	0.000220303		KEGG_PATHWAY	hsa04611:Platelet activation	10	1.69492	0.0465234	0.0465234	ADCY3, ACTG1, P2RY12, ARHGEF1, FYN, NOS3, GNAS, PLA2G4C, PIK3R1, AKT2
ENST00000423894	ENSG00000187118	CMC1	protein_coding	8.65675	1.83599e-06	0.000223695
ENST00000586868	ENSG00000105254	TBCB	protein_coding	8.59237	2.08844e-06	0.000250066
ENST00000541650	ENSG00000118507	AKAP7	protein_coding	8.00568	2.19927e-06	0.000261533
ENST00000199389	ENSG00000086232	EIF2AK1	protein_coding	7.63926	2.29041e-06	0.000269601
ENST00000398473	ENSG00000161813	LARP4	protein_coding	6.72879	2.43738e-06	0.000283062
ENST00000264771	ENSG00000127419	TMEM175	protein_coding	6.47557	2.53171e-06	0.000291096
ENST00000372858	ENSG00000090621	PABPC4	protein_coding	8.50068	2.70923e-06	0.000309459
ENST00000378543	ENSG00000162585	C1orf86	protein_coding	6.16151	2.7526e-06	0.00031274
ENST00000402914	ENSG00000172264	MACROD2	protein_coding	1.50118	2.93796e-06	0.000330154
ENST00000586790	ENSG00000173581	CCDC106	protein_coding	7.7012	3.02958e-06	0.000338261
ENST00000498385	ENSG00000240972	MIF	protein_coding	6.3381	3.28388e-06	0.000363152
ENST00000622724	ENSG00000054523	KIF1B	protein_coding	7.27101	3.41014e-06	0.000370043
ENST00000340852	ENSG00000101294	HM13	protein_coding	6.2096	3.71762e-06	0.000398428
ENST00000398997	ENSG00000130772	MED18	protein_coding	8.90251	3.98014e-06	0.00042525
ENST00000623834	ENSG00000279457	FO538757.2	protein_coding	9.00345	4.08262e-06	0.000433531
ENST00000356207	ENSG00000077782	FGFR1	protein_coding	4.98823	4.22784e-06	0.000447584
ENST00000439128	ENSG00000137601	NEK1	protein_coding	5.80735	4.37171e-06	0.00045862
ENST00000565574	ENSG00000257017	HP	protein_coding	5.32608	4.4679e-06	0.000467299
ENST00000346964	ENSG00000075711	DLG1	protein_coding	6.59859	4.51018e-06	0.000470305
ENST00000409675	ENSG00000081177	EXD2	protein_coding	8.02579	4.57101e-06	0.000472392
ENST00000403325	ENSG00000185838	GNB1L	protein_coding	8.68187	5.36455e-06	0.000540481
ENST00000367697	ENSG00000051620	HEBP2	protein_coding	7.9294	6.08205e-06	0.000598281
ENST00000426744	ENSG00000205189	ZBTB10	protein_coding	7.20918	6.16883e-06	0.000605103
ENST00000620924	ENSG00000102471	NDFIP2	protein_coding	6.48037	6.3687e-06	0.000616008
ENST00000343028	ENSG00000064115	TM7SF3	protein_coding	7.76416	6.43345e-06	0.000620542
ENST00000468694	ENSG00000136279	DBNL	protein_coding	7.53662	6.63605e-06	0.000638311
ENST00000243662	ENSG00000123892	RAB38	protein_coding	7.28839	6.83253e-06	0.000650007
ENST00000546433	ENSG00000084112	SSH1	protein_coding	8.07972	6.99365e-06	0.00066171
ENST00000470196	ENSG00000160226	C21orf2	protein_coding	6.38038	7.23082e-06	0.00068229
ENST00000421200	ENSG00000167615	LENG8	protein_coding	8.14931	7.42156e-06	0.000696503
ENST00000381093	ENSG00000146938	NLGN4X	protein_coding	7.86821	7.48958e-06	0.000700993
ENST00000336898	ENSG00000158555	GDPD5	protein_coding	5.64804	7.52331e-06	0.000701717
ENST00000369752	ENSG00000162777	DENND2D	protein_coding	6.09803	7.53774e-06	0.000701717
ENST00000396941	ENSG00000100897	DCAF11	protein_coding	5.43226	8.19533e-06	0.000750856
ENST00000510818	ENSG00000164172	MOCS2	protein_coding	6.86071	8.98532e-06	0.00081677
ENST00000404393	ENSG00000128309	MPST	protein_coding	7.20525	9.3147e-06	0.000844501
ENST00000575734	ENSG00000166292	TMEM100	protein_coding	6.928	9.56647e-06	0.000865068
ENST00000244576	ENSG00000124613	ZNF391	protein_coding	5.36838	9.59247e-06	0.000865166
ENST00000253513	ENSG00000131203	IDO1	protein_coding	8.74346	1.01321e-05	0.000902116
ENST00000235329	ENSG00000116688	MFN2	protein_coding	6.68126	1.05724e-05	0.000931765
ENST00000448507	ENSG00000132405	TBC1D14	protein_coding	7.55976	1.12334e-05	0.000975171
ENST00000418933	ENSG00000241837	ATP5O	protein_coding	6.02602	1.20252e-05	0.00103102
ENST00000306869	ENSG00000169738	DCXR	protein_coding	6.53825	1.23322e-05	0.00104769
ENST00000535306	ENSG00000181481	RNF135	protein_coding	6.20668	1.29847e-05	0.00109172
ENST00000259043	ENSG00000136527	TRA2B	protein_coding	4.99805	1.30553e-05	0.001095
ENST00000462699	ENSG00000081803	CADPS2	protein_coding	5.64558	1.35867e-05	0.00112867
ENST00000431676	ENSG00000132321	IQCA1	protein_coding	5.17774	1.45437e-05	0.00119107
ENST00000247178	ENSG00000126775	ATG14	protein_coding	8.10972	1.46402e-05	0.00119506
ENST00000450168	ENSG00000166816	LDHD	protein_coding	6.43363	1.48492e-05	0.00120403
ENST00000409400	ENSG00000136717	BIN1	protein_coding	5.1067	1.56487e-05	0.00125493
ENST00000264220	ENSG00000128059	PPAT	protein_coding	6.28168	1.69091e-05	0.00133443
ENST00000581497	ENSG00000136450	SRSF1	protein_coding	6.76894	1.70576e-05	0.0013431
ENST00000502268	ENSG00000121073	SLC35B1	protein_coding	3.53626	1.73717e-05	0.00136474
ENST00000595782	ENSG00000130313	PGLS	protein_coding	5.17651	1.79733e-05	0.00140564
ENST00000396593	ENSG00000153048	CARHSP1	protein_coding	6.07867	1.90826e-05	0.00148238
ENST00000520738	ENSG00000158941	CCAR2	protein_coding	6.17728	1.92782e-05	0.00149316
ENST00000329043	ENSG00000170448	NFXL1	protein_coding	7.61409	1.96682e-05	0.00150431
ENST00000577734	ENSG00000141627	DYM	protein_coding	7.03867	2.00079e-05	0.00152358
ENST00000484746	ENSG00000058668	ATP2B4	protein_coding	5.30694	2.05996e-05	0.00155839
ENST00000373910	ENSG00000072401	UBE2D1	protein_coding	9.11868	2.13246e-05	0.00159991
ENST00000438666	ENSG00000133104	SPG20	protein_coding	9.47573	2.13327e-05	0.00159991
ENST00000613904	ENSG00000129696	TTI2	protein_coding	4.71963	2.3333e-05	0.00170572
ENST00000506128	ENSG00000087206	UIMC1	protein_coding	5.49318	2.44285e-05	0.00177089
ENST00000537526	ENSG00000124422	USP22	protein_coding	11.0205	2.72859e-05	0.00194865
ENST00000448471	ENSG00000261408	TEN1-CDK3	protein_coding	8.31278	2.95175e-05	0.00208211
ENST00000370203	ENSG00000152078	TMEM56	protein_coding	6.16516	2.95612e-05	0.00208211
ENST00000426395	ENSG00000104870	FCGRT	protein_coding	5.57623	3.14043e-05	0.00217661
ENST00000586746	ENSG00000099817	POLR2E	protein_coding	5.62324	3.26367e-05	0.00224411
ENST00000395938	ENSG00000109099	PMP22	protein_coding	5.85121	3.32283e-05	0.00227259
ENST00000549311	ENSG00000111077	TNS2	protein_coding	7.24862	3.33652e-05	0.00227259
ENST00000254722	ENSG00000132386	SERPINF1	protein_coding	7.88194	3.42339e-05	0.00231723
ENST00000574671	ENSG00000184009	ACTG1	protein_coding	5.42152	3.66019e-05	0.0024536
ENST00000359280	ENSG00000143537	ADAM15	protein_coding	6.53673	3.68791e-05	0.00246267
ENST00000421097	ENSG00000068120	COASY	protein_coding	8.87907	3.82306e-05	0.00253343
ENST00000379707	ENSG00000107262	BAG1	protein_coding	6.18196	4.06237e-05	0.00267162
ENST00000303251	ENSG00000169228	RAB24	protein_coding	4.62689	4.11123e-05	0.00269356
ENST00000591968	ENSG00000124299	PEPD	protein_coding	6.04241	4.19428e-05	0.00274177
ENST00000301724	ENSG00000167965	MLST8	protein_coding	6.3915	4.20831e-05	0.00274177
ENST00000535459	ENSG00000112096	SOD2	protein_coding	7.37487	4.33561e-05	0.00281401
ENST00000374870	ENSG00000131089	ARHGEF9	protein_coding	7.51121	4.61689e-05	0.00296334
ENST00000412573	ENSG00000164647	STEAP1	protein_coding	5.66038	4.99024e-05	0.00317947
ENST00000616966	ENSG00000171135	JAGN1	protein_coding	7.69363	5.01042e-05	0.00318648
ENST00000432183	ENSG00000119729	RHOQ	protein_coding	7.18694	5.10373e-05	0.00323398
ENST00000593068	ENSG00000182087	TMEM259	protein_coding	4.84157	5.15637e-05	0.00326138
ENST00000447699	ENSG00000196305	IARS	protein_coding	4.92254	5.18297e-05	0.00327225
ENST00000404032	ENSG00000119777	TMEM214	protein_coding	6.21222	5.27812e-05	0.00330837
ENST00000331163	ENSG00000100311	PDGFB	protein_coding	5.22793	5.32675e-05	0.00332673
ENST00000466265	ENSG00000107625	DDX50	protein_coding	5.33137	5.35212e-05	0.00333657
ENST00000505228	ENSG00000157881	PANK4	protein_coding	6.33039	5.56188e-05	0.00344261
ENST00000533706	ENSG00000110274	CEP164	protein_coding	4.89189	5.70585e-05	0.00350672
ENST00000479802	ENSG00000231500	RPS18	protein_coding	4.28326	5.79696e-05	0.00353768
ENST00000614363	ENSG00000204387	C6orf48	protein_coding	5.31372	6.65227e-05	0.00398952
ENST00000588560	ENSG00000105518	TMEM205	protein_coding	5.84602	6.72641e-05	0.00402703
ENST00000037869	ENSG00000035141	FAM136A	protein_coding	6.64731	6.83844e-05	0.00408004
ENST00000418931	ENSG00000223865	HLA-DPB1	protein_coding	6.22773	6.85532e-05	0.00408309
ENST00000543601	ENSG00000154783	FGD5	protein_coding	5.63876	6.90109e-05	0.0040965
ENST00000550595	ENSG00000166598	HSP90B1	protein_coding	5.73812	6.92388e-05	0.0040965
ENST00000005257	ENSG00000006451	RALA	protein_coding	5.11861	7.42154e-05	0.0043458
ENST00000284957	ENSG00000154710	RABGEF1	protein_coding	4.43992	7.65038e-05	0.00447225
ENST00000526772	ENSG00000198561	CTNND1	protein_coding	4.4285	8.18441e-05	0.0047445
ENST00000538028	ENSG00000103591	AAGAB	protein_coding	6.67308	8.30985e-05	0.00480918
ENST00000360957	ENSG00000104881	PPP1R13L	protein_coding	5.49259	8.58307e-05	0.00493441
ENST00000393445	ENSG00000135945	REV1	protein_coding	7.32596	8.71053e-05	0.00498294
ENST00000410053	ENSG00000163510	CWC22	protein_coding	5.32303	8.98739e-05	0.00509932
ENST00000242576	ENSG00000076248	UNG	protein_coding	7.38868	9.03209e-05	0.00509968
ENST00000394308	ENSG00000070669	ASNS	protein_coding	5.64016	9.25046e-05	0.00518923
ENST00000404704	ENSG00000157954	WIPI2	protein_coding	5.05087	9.50409e-05	0.00530579
ENST00000587843	ENSG00000067836	ROGDI	protein_coding	7.57249	0.000100632	0.00559093
ENST00000433686	ENSG00000121413	ZSCAN18	protein_coding	6.29511	0.000102623	0.00568341
ENST00000426907	ENSG00000086758	HUWE1	protein_coding	5.91849	0.000107336	0.00589734
ENST00000411955	ENSG00000177409	SAMD9L	protein_coding	4.23439	0.000107815	0.00591435
ENST00000497404	ENSG00000143119	CD53	protein_coding	4.54317	0.000108389	0.00593643
ENST00000487577	ENSG00000025708	TYMP	protein_coding	5.81483	0.000108835	0.00595147
ENST00000338432	ENSG00000076555	ACACB	protein_coding	4.73734	0.000110086	0.00598624
ENST00000544417	ENSG00000166710	B2M	protein_coding	4.79162	0.000115811	0.00625413
ENST00000242057	ENSG00000106546	AHR	protein_coding	7.73917	0.00011751	0.00633605
ENST00000617871	ENSG00000010278	CD9	protein_coding	5.98877	0.000121787	0.00648607
ENST00000372172	ENSG00000126107	HECTD3	protein_coding	9.10734	0.000126172	0.0066991
ENST00000431081	ENSG00000149577	SIDT2	protein_coding	7.5659	0.000126411	0.00670153
ENST00000462582	ENSG00000185909	KLHDC8B	protein_coding	5.45558	0.000128114	0.00677112
ENST00000563465	ENSG00000102900	NUP93	protein_coding	5.68653	0.000138472	0.0072414
ENST00000555895	ENSG00000100804	PSMB5	protein_coding	4.86202	0.000142214	0.00736672
ENST00000391881	ENSG00000105443	CYTH2	protein_coding	4.54561	0.000142493	0.00736672
ENST00000379328	ENSG00000107485	GATA3	protein_coding	5.66264	0.000144735	0.00745665
ENST00000602875	ENSG00000213523	SRA1	protein_coding	3.79682	0.000145976	0.00747623
ENST00000382226	ENSG00000178177	LCORL	protein_coding	8.20214	0.000148962	0.0075622
ENST00000612484	ENSG00000086758	HUWE1	protein_coding	4.575	0.000149383	0.00757254
ENST00000428120	ENSG00000162585	C1orf86	protein_coding	5.69933	0.000151453	0.00765509
ENST00000536985	ENSG00000170525	PFKFB3	protein_coding	6.43865	0.000154068	0.0077654
ENST00000626989	ENSG00000143801	PSEN2	protein_coding	6.51172	0.00016017	0.00803719
ENST00000383820	ENSG00000156990	RPUSD3	protein_coding	8.04886	0.000164586	0.00822316
ENST00000397709	ENSG00000101460	MAP1LC3A	protein_coding	6.02049	0.000164973	0.00822581
ENST00000323703	ENSG00000163795	ZNF513	protein_coding	7.86625	0.000165495	0.00823304
ENST00000493802	ENSG00000162645	GBP2	protein_coding	5.56876	0.000170111	0.00842997
ENST00000480184	ENSG00000077157	PPP1R12B	protein_coding	5.40226	0.000175095	0.00864863
ENST00000515815	ENSG00000073578	SDHA	protein_coding	5.19104	0.000185132	0.00905428
ENST00000278823	ENSG00000149480	MTA2	protein_coding	5.98231	0.000195936	0.00944957
ENST00000539887	ENSG00000023734	STRAP	protein_coding	4.25047	0.000196637	0.00947019
ENST00000507634	ENSG00000163138	PACRGL	protein_coding	5.90997	0.000203583	0.00972384
ENST00000594790	ENSG00000105499	PLA2G4C	protein_coding	5.56993	0.000206594	0.00978688
ENST00000373475	ENSG00000116497	S100PBP	protein_coding	9.3493	0.000207793	0.00981163
ENST00000515524	ENSG00000164346	NSA2	protein_coding	4.52888	0.000209489	0.00985678
ENST00000582050	ENSG00000161960	EIF4A1	protein_coding	4.67468	0.00021197	0.0099331
ENST00000451137	ENSG00000142871	CYR61	protein_coding	5.00483	0.000213247	0.00997952
ENST00000545000	ENSG00000153015	CWC27	protein_coding	3.83875	0.000224453	0.0104196
ENST00000405975	ENSG00000115970	THADA	protein_coding	4.83277	0.000225274	0.0104438
ENST00000317201	ENSG00000105997	HOXA3	protein_coding	6.2633	0.000229566	0.0105863
ENST00000540977	ENSG00000064490	RFXANK	protein_coding	4.81632	0.000247881	0.011281
ENST00000400247	ENSG00000125826	RBCK1	protein_coding	4.57662	0.000248712	0.0112893
ENST00000455140	ENSG00000127527	EPS15L1	protein_coding	9.64343	0.000252509	0.0113724
ENST00000379565	ENSG00000177189	RPS6KA3	protein_coding	6.0458	0.000254161	0.0114214
ENST00000245382	ENSG00000125319	C17orf53	protein_coding	7.32411	0.000255423	0.0114324
ENST00000413852	ENSG00000001617	SEMA3F	protein_coding	5.4339	0.000255444	0.0114324
ENST00000540709	ENSG00000135679	MDM2	protein_coding	4.44363	0.000255487	0.0114324
ENST00000614860	ENSG00000132952	USPL1	protein_coding	6.89371	0.000266237	0.0118675
ENST00000243347	ENSG00000123610	TNFAIP6	protein_coding	3.39348	0.000268126	0.0119212
ENST00000419198	ENSG00000100908	EMC9	protein_coding	6.45714	0.000271841	0.0120554
ENST00000310300	ENSG00000077454	LRCH4	protein_coding	4.64398	0.000280211	0.0123792
ENST00000465289	ENSG00000117620	SLC35A3	protein_coding	6.69364	0.000280991	0.0123844
ENST00000394801	ENSG00000109332	UBE2D3	protein_coding	5.45143	0.000284584	0.0125246
ENST00000380482	ENSG00000102802	MEDAG	protein_coding	4.9418	0.000286481	0.0125763
ENST00000380412	ENSG00000169957	ZNF768	protein_coding	4.22377	0.000286483	0.0125763
ENST00000623691	ENSG00000169727	GPS1	protein_coding	4.09488	0.000294689	0.0128391
ENST00000254963	ENSG00000132622	HSPA12B	protein_coding	4.22966	0.000309759	0.0133782
ENST00000294964	ENSG00000162878	PKDCC	protein_coding	6.24977	0.000315697	0.013584
ENST00000366857	ENSG00000143771	CNIH4	protein_coding	7.32898	0.000326369	0.01398
ENST00000520781	ENSG00000104763	ASAH1	protein_coding	4.73724	0.00032651	0.01398
ENST00000461915	ENSG00000204351	SKIV2L	protein_coding	5.49953	0.000332566	0.0141821
ENST00000392904	ENSG00000017427	IGF1	protein_coding	4.54798	0.00033704	0.0143248
ENST00000216254	ENSG00000100412	ACO2	protein_coding	9.42665	0.000337601	0.0143311
ENST00000468085	ENSG00000143507	DUSP10	protein_coding	6.73357	0.00034413	0.0145727
ENST00000529601	ENSG00000149809	TM7SF2	protein_coding	5.67164	0.000346568	0.0146307
ENST00000215790	ENSG00000099992	TBC1D10A	protein_coding	5.34986	0.000346764	0.0146307
ENST00000469475	ENSG00000108671	PSMD11	protein_coding	4.63101	0.000349737	0.0147203
ENST00000460495	ENSG00000114098	ARMC8	protein_coding	4.03441	0.000353088	0.0148434
ENST00000261789	ENSG00000100926	TM9SF1	protein_coding	5.34052	0.000356813	0.0149818
ENST00000525828	ENSG00000110700	RPS13	protein_coding	5.52305	0.000375609	0.0156763
ENST00000302692	ENSG00000171612	SLC25A33	protein_coding	6.05616	0.00037691	0.0156827
ENST00000220325	ENSG00000103966	EHD4	protein_coding	5.82393	0.000377455	0.0156827
ENST00000611412	ENSG00000136631	VPS45	protein_coding	5.05974	0.000391588	0.0160727
ENST00000373144	ENSG00000160408	ST6GALNAC6	protein_coding	6.18036	0.000402039	0.016424
ENST00000504114	ENSG00000244754	N4BP2L2	protein_coding	5.14791	0.000414277	0.0168053
ENST00000563426	ENSG00000168701	TMEM208	protein_coding	4.02148	0.000425363	0.0172148
ENST00000557434	ENSG00000100600	LGMN	protein_coding	4.11313	0.000426939	0.0172545
ENST00000300051	ENSG00000166816	LDHD	protein_coding	7.4219	0.000427337	0.0172545
ENST00000613271	ENSG00000167992	VWCE	protein_coding	4.17466	0.000429688	0.0173091
ENST00000405506	ENSG00000196419	XRCC6	protein_coding	4.49658	0.000431037	0.0173434
ENST00000520547	ENSG00000253626	EIF5AL1	protein_coding	3.6369	0.000441545	0.0176842
ENST00000449934	ENSG00000204520	MICA	protein_coding	7.86514	0.000446352	0.0178356
ENST00000398519	ENSG00000141551	CSNK1D	protein_coding	5.8494	0.000458059	0.0181987
ENST00000309190	ENSG00000153113	CAST	protein_coding	8.3629	0.000461625	0.0183194
ENST00000225844	ENSG00000181374	CCL13	protein_coding	5.00495	0.00049332	0.0192472
ENST00000508500	ENSG00000160789	LMNA	protein_coding	3.64003	0.000494676	0.0192569
ENST00000413644	ENSG00000135535	CD164	protein_coding	5.17448	0.000505406	0.0195649
ENST00000441698	ENSG00000175806	MSRA	protein_coding	4.84348	0.000508575	0.0196438
ENST00000356853	ENSG00000187736	NHEJ1	protein_coding	4.36671	0.000510368	0.0196764
ENST00000343262	ENSG00000140988	RPS2	protein_coding	3.31222	0.000514196	0.0197729
ENST00000318364	ENSG00000055950	MRPL43	protein_coding	7.27344	0.000520403	0.0199234
ENST00000247291	ENSG00000126878	AIF1L	protein_coding	9.29841	0.000521081	0.0199273
ENST00000378364	ENSG00000198931	APRT	protein_coding	9.56756	0.000523649	0.019979
ENST00000382329	ENSG00000107099	DOCK8	protein_coding	5.23529	0.000524159	0.019979
ENST00000344135	ENSG00000038382	TRIO	protein_coding	4.72935	0.00053108	0.0202206
ENST00000591650	ENSG00000065000	AP3D1	protein_coding	5.04883	0.000537113	0.0203419
ENST00000418388	ENSG00000238227	C9orf69	protein_coding	5.24606	0.000542818	0.0204656
ENST00000405867	ENSG00000138029	HADHB	protein_coding	5.45236	0.000549313	0.0206407
ENST00000318003	ENSG00000132024	CC2D1A	protein_coding	4.5154	0.00054984	0.0206407
ENST00000347934	ENSG00000095787	WAC	protein_coding	5.70412	0.000552241	0.0206996
ENST00000361684	ENSG00000198792	TMEM184B	protein_coding	5.47701	0.000552601	0.0206996
ENST00000574980	ENSG00000103145	HCFC1R1	protein_coding	5.14437	0.000560736	0.02095
ENST00000262384	ENSG00000102921	N4BP1	protein_coding	7.17655	0.000578188	0.0215062
ENST00000568834	ENSG00000095906	NUBP2	protein_coding	3.2216	0.000582302	0.0216024
ENST00000297494	ENSG00000164867	NOS3	protein_coding	3.36292	0.000591372	0.0219155
ENST00000548386	ENSG00000196531	NACA	protein_coding	4.85086	0.000597005	0.0221007
ENST00000410067	ENSG00000197223	C1D	protein_coding	3.88779	0.00062071	0.0227839
ENST00000530175	ENSG00000166483	WEE1	protein_coding	4.55965	0.000623576	0.0228649
ENST00000505105	ENSG00000163743	RCHY1	protein_coding	4.13332	0.000629187	0.0230463
ENST00000388922	ENSG00000139567	ACVRL1	protein_coding	4.56018	0.000638537	0.0232661
ENST00000375023	ENSG00000204301	NOTCH4	protein_coding	3.83144	0.00064705	0.0235269
ENST00000591084	ENSG00000161265	U2AF1L4	protein_coding	3.82613	0.000648477	0.0235355
ENST00000229570	ENSG00000111850	SMIM8	protein_coding	5.06135	0.000655851	0.0237474
ENST00000590161	ENSG00000099864	PALM	protein_coding	6.30986	0.000662728	0.0239465
ENST00000594665	ENSG00000104880	ARHGEF18	protein_coding	4.00112	0.000664887	0.0239746
ENST00000573786	ENSG00000204237	OXLD1	protein_coding	2.45495	0.000673785	0.02422
ENST00000568675	ENSG00000125144	MT1G	protein_coding	3.59255	0.000682264	0.0244741
ENST00000367924	ENSG00000117143	UAP1	protein_coding	4.63529	0.000685245	0.0245557
ENST00000492449	ENSG00000156931	VPS8	protein_coding	4.85835	0.000710587	0.0253331
ENST00000608548	ENSG00000070413	DGCR2	protein_coding	3.24356	0.000719969	0.0255887
ENST00000298705	ENSG00000165807	PPP1R36	protein_coding	4.82973	0.000738482	0.0260928
ENST00000375736	ENSG00000102606	ARHGEF7	protein_coding	4.33754	0.000741978	0.0261547
ENST00000517334	ENSG00000104219	ZDHHC2	protein_coding	4.86553	0.000742672	0.0261547
ENST00000470985	ENSG00000111716	LDHB	protein_coding	4.03541	0.000746325	0.026218
ENST00000397145	ENSG00000123243	ITIH5	protein_coding	5.02791	0.000754222	0.0264541
ENST00000586575	ENSG00000130733	YIPF2	protein_coding	5.01996	0.000756569	0.0265097
ENST00000419755	ENSG00000256349	CTD-3074O7.11	protein_coding	6.30182	0.000809887	0.0280262
ENST00000264779	ENSG00000062194	GPBP1	protein_coding	6.18495	0.000826393	0.0284962
ENST00000324856	ENSG00000117713	ARID1A	protein_coding	4.12271	0.000827751	0.0285147
ENST00000449570	ENSG00000114026	OGG1	protein_coding	4.84181	0.000829984	0.0285633
ENST00000508465	ENSG00000138750	NUP54	protein_coding	6.4978	0.00083414	0.0286718
ENST00000268942	ENSG00000141219	C17orf80	protein_coding	5.40721	0.000834787	0.0286718
ENST00000269033	ENSG00000141298	SSH2	protein_coding	3.20138	0.000839923	0.02877
ENST00000377043	ENSG00000135048	TMEM2	protein_coding	6.23753	0.000840133	0.02877
ENST00000457098	ENSG00000115207	GTF3C2	protein_coding	4.19037	0.000852806	0.0290892
ENST00000545638	ENSG00000123338	NCKAP1L	protein_coding	3.8237	0.000859474	0.0292305
ENST00000392679	ENSG00000150455	TIRAP	protein_coding	5.53057	0.000868819	0.0294618
ENST00000331588	ENSG00000184545	DUSP8	protein_coding	3.46774	0.000871353	0.0295019
ENST00000382366	ENSG00000174373	RALGAPA1	protein_coding	4.76323	0.00087255	0.0295019
ENST00000296933	ENSG00000072803	FBXW11	protein_coding	6.82681	0.000901045	0.0302591
ENST00000561006	ENSG00000078304	PPP2R5C	protein_coding	4.64025	0.000908445	0.0304487
ENST00000563241	ENSG00000198848	CES1	protein_coding	10.1146	0.000910555	0.03049
ENST00000333360	ENSG00000007908	SELE	protein_coding	3.68815	0.000915845	0.0306081
ENST00000301964	ENSG00000171148	TADA3	protein_coding	4.38939	0.000934776	0.0310477
ENST00000485852	ENSG00000164904	ALDH7A1	protein_coding	4.51078	0.000935257	0.0310477
ENST00000586720	ENSG00000108679	LGALS3BP	protein_coding	3.24749	0.00094058	0.0311648
ENST00000437034	ENSG00000153113	CAST	protein_coding	4.03138	0.000943169	0.0312208
ENST00000348411	ENSG00000068438	FTSJ1	protein_coding	5.74869	0.000975783	0.0321676
ENST00000302632	ENSG00000169313	P2RY12	protein_coding	4.2939	0.000977331	0.0321676
ENST00000595143	ENSG00000105373	GLTSCR2	protein_coding	3.95978	0.000981162	0.0322326
ENST00000371837	ENSG00000107798	LIPA	protein_coding	4.60577	0.000991802	0.0325513
ENST00000411832	ENSG00000106635	BCL7B	protein_coding	4.8366	0.000999784	0.0327589
ENST00000253934	ENSG00000131634	TMEM204	protein_coding	3.85477	0.00100001	0.0327589
ENST00000579287	ENSG00000172057	ORMDL3	protein_coding	5.67972	0.00102988	0.0334847
ENST00000368457	ENSG00000163348	PYGO2	protein_coding	3.46527	0.00105813	0.0342429
ENST00000428288	ENSG00000106049	HIBADH	protein_coding	3.71523	0.00106442	0.0343504
ENST00000469123	ENSG00000106028	SSBP1	protein_coding	7.0578	0.00106989	0.0344949
ENST00000486241	ENSG00000108953	YWHAE	protein_coding	3.46601	0.00107473	0.0346186
ENST00000394601	ENSG00000011304	PTBP1	protein_coding	6.38151	0.00108933	0.0349349
ENST00000508274	ENSG00000157869	RAB28	protein_coding	4.22106	0.00108959	0.0349349
ENST00000592164	ENSG00000072071	LPHN1	protein_coding	5.12667	0.00110624	0.0352996
ENST00000375305	ENSG00000158169	FANCC	protein_coding	4.86991	0.00111396	0.0354872
ENST00000412582	ENSG00000139684	ESD	protein_coding	4.01215	0.00112633	0.0358483
ENST00000007390	ENSG00000007520	TSR3	protein_coding	5.46659	0.00113803	0.0361878
ENST00000436227	ENSG00000159140	SON	protein_coding	4.17364	0.00115598	0.0366912
ENST00000431969	ENSG00000143178	TBX19	protein_coding	4.24491	0.00116598	0.0369748
ENST00000325180	ENSG00000100083	GGA1	protein_coding	3.619	0.00117165	0.0371208
ENST00000272928	ENSG00000144476	ACKR3	protein_coding	5.3958	0.00117651	0.0372409
ENST00000343090	ENSG00000130939	UBE4B	protein_coding	4.75246	0.00119516	0.0376595
ENST00000397192	ENSG00000157212	PAXIP1	protein_coding	4.30924	0.00119653	0.0376683
ENST00000369486	ENSG00000143061	IGSF3	protein_coding	4.41762	0.00120609	0.0379254
ENST00000613414	ENSG00000165821	SALL2	protein_coding	4.58887	0.00123169	0.0384321
ENST00000515655	ENSG00000118777	ABCG2	protein_coding	5.34427	0.00125867	0.0390931
ENST00000351578	ENSG00000082074	FYB	protein_coding	4.29756	0.00126645	0.0392687
ENST00000594171	ENSG00000104835	SARS2	protein_coding	4.8185	0.00127869	0.0396002
ENST00000392404	ENSG00000179195	ZNF664	protein_coding	13.764	0.0012807	0.0396002
ENST00000567298	ENSG00000104731	KLHDC4	protein_coding	7.36708	0.00130208	0.0401897
ENST00000418587	ENSG00000145908	ZNF300	protein_coding	4.46738	0.00130983	0.0403931
ENST00000278407	ENSG00000149131	SERPING1	protein_coding	3.81292	0.00131231	0.0404336
ENST00000572925	ENSG00000141258	SGSM2	protein_coding	4.98799	0.00134199	0.0411654
ENST00000366917	ENSG00000116141	MARK1	protein_coding	6.644	0.00136079	0.0416685
ENST00000498288	ENSG00000138031	ADCY3	protein_coding	3.61889	0.0013637	0.0417207
ENST00000612460	ENSG00000102125	TAZ	protein_coding	4.49143	0.00137607	0.0419658
ENST00000612719	ENSG00000251247	ZNF345	protein_coding	4.32024	0.00138833	0.0422879
ENST00000415383	ENSG00000155229	MMS19	protein_coding	6.03377	0.00140197	0.0426287
ENST00000547630	ENSG00000111412	C12orf49	protein_coding	4.14963	0.0014169	0.0430075
ENST00000308271	ENSG00000090686	USP48	protein_coding	3.69847	0.00142655	0.0432246
ENST00000261438	ENSG00000109787	KLF3	protein_coding	8.52126	0.00145724	0.0440487
ENST00000331242	ENSG00000135164	DMTF1	protein_coding	8.54126	0.00147764	0.0445395
ENST00000371120	ENSG00000125703	ATG4C	protein_coding	3.69635	0.00148339	0.0446071
ENST00000445547	ENSG00000065548	ZC3H15	protein_coding	5.43273	0.00150314	0.0450797
ENST00000564428	ENSG00000140464	PML	protein_coding	4.34069	0.00151093	0.0452128
ENST00000291722	ENSG00000160325	CACFD1	protein_coding	6.11841	0.0015132	0.0452128
ENST00000397375	ENSG00000074071	MRPS34	protein_coding	7.48126	0.0015143	0.0452128
ENST00000446859	ENSG00000171757	LRRC34	protein_coding	4.87537	0.00152749	0.0454893
ENST00000367161	ENSG00000133059	DSTYK	protein_coding	6.57558	0.00153694	0.0456925
ENST00000299601	ENSG00000166477	LEO1	protein_coding	4.57498	0.00155754	0.0461468
ENST00000473642	ENSG00000115009	CCL20	protein_coding	2.96761	0.00159651	0.0471005
ENST00000465535	ENSG00000144895	EIF2A	protein_coding	8.17255	0.00160041	0.0471753
ENST00000377704	ENSG00000125871	MGME1	protein_coding	4.89855	0.00160551	0.0472056
ENST00000486533	ENSG00000111799	COL12A1	protein_coding	3.65191	0.00161317	0.0473105
ENST00000478924	ENSG00000133131	MORC4	protein_coding	5.28867	0.00163429	0.0478088
ENST00000376377	ENSG00000137331	IER3	protein_coding	3.57937	0.00166839	0.0486017
ENST00000495891	ENSG00000163659	TIPARP	protein_coding	3.67374	0.00168888	0.0490752
ENST00000290913	ENSG00000159685	CHCHD6	protein_coding	4.32393	0.00171438	0.0496586
ENST00000295802	ENSG00000042445	RETSAT	protein_coding	-15.4734	2.79111	7.3439e-15
ENST00000447382	ENSG00000196083	IL1RAP	protein_coding	-10.6816	2.2777	2.9644e-11
ENST00000262367	ENSG00000005339	CREBBP	protein_coding	-11.7464	3.10637	6.0824e-11
ENST00000616577	ENSG00000133112	TPT1	protein_coding	-7.71317	2.60873	6.21812e-10
ENST00000503556	ENSG00000138640	FAM13A	protein_coding	-6.86814	2.6993	1.11822e-09
ENST00000262039	ENSG00000078142	PIK3C3	protein_coding	-7.16635	2.51855	3.62995e-09
ENST00000423585	ENSG00000154856	APCDD1	protein_coding	-5.44754	0.798569	2.6348e-08
ENST00000394110	ENSG00000112640	PPP2R5D	protein_coding	-8.3843	1.62588	4.67464e-08
ENST00000359827	ENSG00000221866	PLXNA4	protein_coding	-4.84715	1.49955	7.42124e-08
ENST00000358303	ENSG00000091732	ZC3HC1	protein_coding	-4.51322	1.47472	1.40529e-07
ENST00000545668	ENSG00000013573	DDX11	protein_coding	-8.6762	0.633542	1.78114e-07
ENST00000421510	ENSG00000110047	EHD1	protein_coding	-8.91673	3.69912	2.51668e-07
ENST00000355105	ENSG00000159592	GPBP1L1	protein_coding	-6.26966	1.6463	3.28305e-07
ENST00000450127	ENSG00000115539	PDCL3	protein_coding	-9.90672	-0.731165	6.46421e-07
ENST00000574547	ENSG00000132382	MYBBP1A	protein_coding	-11.8787	0.87736	6.46421e-07
ENST00000357884	ENSG00000160392	C19orf47	protein_coding	-9.48912	-1.08359	8.72223e-07
ENST00000428334	ENSG00000157985	AGAP1	protein_coding	-5.54012	2.87755	1.01992e-06
ENST00000458420	ENSG00000158258	CLSTN2	protein_coding	-1.90799	3.07689	1.02674e-06
ENST00000488546	ENSG00000087460	GNAS	protein_coding	-1.70416	3.69059	1.59786e-06
ENST00000598681	ENSG00000105373	GLTSCR2	protein_coding	-7.39742	4.56537	1.91794e-06
ENST00000456182	ENSG00000146963	C7orf55-LUC7L2	protein_coding	-7.63219	1.85348	1.98323e-06
ENST00000420541	ENSG00000121858	TNFSF10	protein_coding	-7.61033	1.60472	2.13932e-06
ENST00000511115	ENSG00000189184	PCDH18	protein_coding	-12.4817	2.2098	2.52334e-06
ENST00000423565	ENSG00000105875	WDR91	protein_coding	-8.13265	0.693933	3.75674e-06
ENST00000378748	ENSG00000123240	OPTN	protein_coding	-7.24386	2.28319	3.75674e-06
ENST00000511573	ENSG00000138640	FAM13A	protein_coding	-5.16193	1.80472	3.81781e-06
ENST00000619546	ENSG00000278540	ACACA	protein_coding	-6.27772	2.58516	3.96658e-06
ENST00000481332	ENSG00000174953	DHX36	protein_coding	-6.43231	-0.338674	5.67412e-06
ENST00000340692	ENSG00000124615	MOCS1	protein_coding	-3.40819	3.33084	7.07868e-06
ENST00000457823	ENSG00000163104	SMARCAD1	protein_coding	-6.80196	1.33972	7.92441e-06
ENST00000261534	ENSG00000009830	POMT2	protein_coding	-2.14453	1.07856	1.05457e-05
ENST00000495946	ENSG00000137404	NRM	protein_coding	-7.13932	-0.960988	1.67256e-05
ENST00000336909	ENSG00000134352	IL6ST	protein_coding	-6.48937	9.1089	1.91522e-05
ENST00000610139	ENSG00000132716	DCAF8	protein_coding	-11.6227	0.202791	1.97273e-05
ENST00000288976	ENSG00000158079	PTPDC1	protein_coding	-7.51799	0.346249	2.05723e-05
ENST00000435345	ENSG00000116171	SCP2	protein_coding	-2.78526	3.98171	2.27449e-05
ENST00000506882	ENSG00000145241	CENPC	protein_coding	-6.41727	1.14656	2.60093e-05
ENST00000262850	ENSG00000083750	RRAGB	protein_coding	-6.4359	-0.932808	2.76841e-05
ENST00000456735	ENSG00000196712	NF1	protein_coding	-3.15763	2.17409	2.82404e-05
ENST00000506060	ENSG00000168255	POLR2J3	protein_coding	-5.86701	0.486863	3.46651e-05
ENST00000397370	ENSG00000131051	RBM39	protein_coding	-9.15967	-0.546845	3.79432e-05
ENST00000373344	ENSG00000085224	ATRX	protein_coding	-6.26057	1.18612	5.07408e-05
ENST00000546267	ENSG00000233024	RP11-1212A22.4	protein_coding	-7.55732	3.13014	5.1297e-05
ENST00000563934	ENSG00000188215	DCUN1D3	protein_coding	-6.28975	2.42739	5.81236e-05
ENST00000361055	ENSG00000144744	UBA3	protein_coding	-6.59744	1.33415	5.86883e-05
ENST00000517379	ENSG00000164684	ZNF704	protein_coding	-6.2231	-0.973543	0.000100215
ENST00000232854	ENSG00000114735	HEMK1	protein_coding	-5.40868	0.437539	0.000112008
ENST00000376839	ENSG00000072110	ACTN1	protein_coding	-5.71344	5.5351	0.000119563
ENST00000488245	ENSG00000169764	UGP2	protein_coding	-2.00329	3.17162	0.000120772
ENST00000529750	ENSG00000023171	GRAMD1B	protein_coding	-4.8573	0.722193	0.000151408
ENST00000597618	ENSG00000130726	TRIM28	protein_coding	-6.17715	1.61682	0.000157087
ENST00000375403	ENSG00000150401	DCUN1D2	protein_coding	-5.747	1.16446	0.000158812
ENST00000261443	ENSG00000009307	CSDE1	protein_coding	-5.69345	8.91231	0.00022706
ENST00000539144	ENSG00000140853	NLRC5	protein_coding	-6.41552	2.80946	0.000238473
ENST00000226207	ENSG00000109061	MYH1	protein_coding	-4.30578	3.50978	0.000259844
ENST00000589189	ENSG00000141429	GALNT1	protein_coding	-5.82868	3.0756	0.000269226
ENST00000229416	ENSG00000001084	GCLC	protein_coding	-6.01501	2.20511	0.000335375
ENST00000579793	ENSG00000264343	NOTCH2NL	protein_coding	-4.57361	-0.627377	0.000363412
ENST00000593678	ENSG00000125651	GTF2F1	protein_coding	-5.05959	1.56088	0.000363504
ENST00000584985	ENSG00000126351	THRA	protein_coding	-6.4513	1.09197	0.000389956
ENST00000320741	ENSG00000181092	ADIPOQ	protein_coding	-4.82272	4.30456	0.000451091
ENST00000601166	ENSG00000105221	AKT2	protein_coding	-5.21279	0.839748	0.000456455
ENST00000539068	ENSG00000096060	FKBP5	protein_coding	-5.16265	1.90989	0.000471276
ENST00000476998	ENSG00000130638	ATXN10	protein_coding	-2.90552	0.25667	0.000490525
ENST00000372936	ENSG00000188917	TRMT2B	protein_coding	-4.32213	-0.364098	0.000561615
ENST00000493382	ENSG00000114698	PLSCR4	protein_coding	-2.92992	-0.0229912	0.000609337
ENST00000504948	ENSG00000017260	ATP2C1	protein_coding	-5.43158	2.09222	0.000647547
ENST00000560468	ENSG00000182718	ANXA2	protein_coding	-6.65597	2.01589	0.000647547
ENST00000259241	ENSG00000136720	HS6ST1	protein_coding	-4.47549	1.23356	0.000660534
ENST00000584838	ENSG00000169733	RFNG	protein_coding	-4.78051	0.959986	0.00071728
ENST00000435794	ENSG00000131503	ANKHD1	protein_coding	-7.46629	2.08227	0.000757575
ENST00000592273	ENSG00000123144	C19orf43	protein_coding	-4.80118	3.79194	0.000939193
ENST00000367571	ENSG00000118495	PLAGL1	protein_coding	-6.1026	-1.79274	0.000957248
ENST00000372977	ENSG00000137413	TAF8	protein_coding	-6.45904	2.74322	0.00097402
ENST00000412157	ENSG00000184209	SNRNP35	protein_coding	-5.43604	-0.736632	0.000977461
ENST00000462132	ENSG00000106484	MEST	protein_coding	-4.64522	0.859666	0.00101399
ENST00000492245	ENSG00000150459	SAP18	protein_coding	-5.48362	1.79746	0.00101876
ENST00000337665	ENSG00000076928	ARHGEF1	protein_coding	-5.79357	4.09659	0.00104425
ENST00000481797	ENSG00000143624	INTS3	protein_coding	-5.25077	0.266858	0.00104769
ENST00000479870	ENSG00000198420	TCAF1	protein_coding	-1.4838	2.61604	0.00109172
ENST00000600873	ENSG00000104824	HNRNPL	protein_coding	-1.36027	4.38185	0.00110368
ENST00000473474	ENSG00000134255	CEPT1	protein_coding	-5.01771	-0.762684	0.00112867
ENST00000230914	ENSG00000112996	MRPS30	protein_coding	-6.05991	2.00694	0.00117185
ENST00000594523	ENSG00000160014	CALM3	protein_coding	-3.33149	1.01973	0.00119506
ENST00000559228	ENSG00000128923	FAM63B	protein_coding	-4.81924	3.94897	0.00119944
ENST00000448244	ENSG00000055950	MRPL43	protein_coding	-5.89039	0.866798	0.00129811
ENST00000554589	ENSG00000165516	KLHDC2	protein_coding	-6.31997	1.06397	0.00131264
ENST00000472519	ENSG00000124357	NAGK	protein_coding	-4.98526	0.240978	0.00139887
ENST00000470354	ENSG00000172354	GNB2	protein_coding	-4.7725	4.69364	0.00149316
ENST00000583217	ENSG00000161960	EIF4A1	protein_coding	-5.46749	-0.677909	0.00152154
ENST00000512781	ENSG00000109736	MFSD10	protein_coding	-4.55192	0.387851	0.00153984
ENST00000376083	ENSG00000135049	AGTPBP1	protein_coding	-4.7401	1.99563	0.00157026
ENST00000470310	ENSG00000163710	PCOLCE2	protein_coding	-6.61359	-1.53104	0.00157503
ENST00000503719	ENSG00000249437	NAIP	protein_coding	-3.70649	0.82173	0.00169453
ENST00000492898	ENSG00000198837	DENND4B	protein_coding	-5.37435	-0.8127	0.00179937
ENST00000556195	ENSG00000184990	SIVA1	protein_coding	-4.24406	1.28634	0.00187535
ENST00000492563	ENSG00000043093	DCUN1D1	protein_coding	-4.69082	0.242333	0.00188918
ENST00000621366	ENSG00000088970	KIZ	protein_coding	-5.23201	0.682669	0.00192954
ENST00000536554	ENSG00000141198	TOM1L1	protein_coding	-2.40058	0.85519	0.00195109
ENST00000592484	ENSG00000130881	LRP3	protein_coding	-6.27735	1.34807	0.00211718
ENST00000320694	ENSG00000145675	PIK3R1	protein_coding	-8.06566	0.248618	0.00214734
ENST00000548938	ENSG00000061273	HDAC7	protein_coding	-4.29647	2.32903	0.00214734
ENST00000604423	ENSG00000266028	SRGAP2	protein_coding	-5.67333	-0.451144	0.00217782
ENST00000441983	ENSG00000171853	TRAPPC12	protein_coding	-4.50876	-0.133796	0.00228869
ENST00000560937	ENSG00000140545	MFGE8	protein_coding	-3.36491	-0.0813386	0.00245623
ENST00000450460	ENSG00000083642	PDS5B	protein_coding	-5.07679	2.70397	0.00248345
ENST00000542927	ENSG00000196498	NCOR2	protein_coding	-4.78978	-0.291828	0.00253343
ENST00000538171	ENSG00000126602	TRAP1	protein_coding	-4.62595	3.93806	0.0026325
ENST00000238609	ENSG00000119632	IFI27L2	protein_coding	-5.7737	1.30282	0.00263378
ENST00000561457	ENSG00000238227	C9orf69	protein_coding	-4.48522	4.39612	0.00331907
ENST00000497833	ENSG00000170262	MRAP	protein_coding	-5.93776	4.99833	0.00339078
ENST00000430424	ENSG00000125734	GPR108	protein_coding	-5.4683	1.60358	0.00352485
ENST00000370935	ENSG00000165675	ENOX2	protein_coding	-4.89108	-0.981405	0.00368116
ENST00000257190	ENSG00000134758	RNF138	protein_coding	-5.74931	1.30354	0.00377629
ENST00000453848	ENSG00000006118	TMEM132A	protein_coding	-4.96428	1.31005	0.00471243
ENST00000436645	ENSG00000183628	DGCR6	protein_coding	-4.4295	1.94801	0.00488194
ENST00000491885	ENSG00000010810	FYN	protein_coding	-5.1487	-0.271975	0.00494262
ENST00000543127	ENSG00000134759	ELP2	protein_coding	-4.3431	1.01878	0.00497189
ENST00000306688	ENSG00000169683	LRRC45	protein_coding	-3.26411	1.54725	0.00509968
ENST00000371482	ENSG00000165802	NSMF	protein_coding	-4.27666	-0.426607	0.00512642
ENST00000358187	ENSG00000148841	ITPRIP	protein_coding	-3.70724	4.64574	0.0051645
ENST00000340855	ENSG00000010404	IDS	protein_coding	-5.04385	0.114633	0.00521343
ENST00000588595	ENSG00000198258	UBL5	protein_coding	-4.18688	0.0671965	0.00567015
ENST00000481054	ENSG00000145191	EIF2B5	protein_coding	-4.16125	0.876613	0.00598624
ENST00000397881	ENSG00000130813	C19orf66	protein_coding	-4.31474	1.62769	0.00609342
ENST00000394144	ENSG00000036054	TBC1D23	protein_coding	-4.0609	5.20231	0.00619545
ENST00000396150	ENSG00000083828	ZNF586	protein_coding	-4.2224	1.32388	0.00634975
ENST00000550660	ENSG00000111077	TNS2	protein_coding	-4.21276	2.21951	0.00746836
ENST00000340368	ENSG00000186480	INSIG1	protein_coding	-4.20599	4.14129	0.00750584
ENST00000555353	ENSG00000053254	FOXN3	protein_coding	-3.10437	0.766212	0.00843502
ENST00000476581	ENSG00000154767	XPC	protein_coding	-5.12314	1.43349	0.00917962
ENST00000476655	ENSG00000148334	PTGES2	protein_coding	-4.34944	1.02877	0.00919727
ENST00000464538	ENSG00000138074	SLC5A6	protein_coding	-4.66956	-1.85291	0.00972744
ENST00000559250	ENSG00000100889	PCK2	protein_coding	-3.97412	0.813305	0.00975566
ENST00000416293	ENSG00000111275	ALDH2	protein_coding	-3.29027	7.87322	0.00981163
ENST00000298832	ENSG00000119685	TTLL5	protein_coding	-4.97396	1.70401	0.0098477
ENST00000375882	ENSG00000204435	CSNK2B	protein_coding	-4.21795	3.01324	0.00990698
ENST00000480447	ENSG00000101361	NOP56	protein_coding	-3.72706	0.499727	0.010129
ENST00000378944	ENSG00000004777	ARHGAP33	protein_coding	-5.01695	0.103116	0.0104764
ENST00000549106	ENSG00000111275	ALDH2	protein_coding	-4.04035	5.49574	0.0107359
ENST00000292169	ENSG00000160678	S100A1	protein_coding	-3.27763	4.38785	0.010884
ENST00000541961	ENSG00000254986	DPP3	protein_coding	-4.2721	2.27774	0.0112709
ENST00000506651	ENSG00000196616	ADH1B	protein_coding	-3.41768	9.89901	0.0112893
ENST00000374643	ENSG00000181704	YIPF6	protein_coding	-3.72977	1.1946	0.0114214
ENST00000587421	ENSG00000175387	SMAD2	protein_coding	-3.88799	-0.189713	0.0123377
ENST00000378076	ENSG00000077943	ITGA8	protein_coding	-3.78122	2.2417	0.0131131
ENST00000570907	ENSG00000185624	P4HB	protein_coding	-3.88121	2.8077	0.0132161
ENST00000590592	ENSG00000134775	FHOD3	protein_coding	-2.68256	-0.626248	0.0140929
ENST00000508591	ENSG00000163312	HELQ	protein_coding	-5.22001	0.625783	0.015428
ENST00000457641	ENSG00000146826	C7orf43	protein_coding	-2.70371	2.21357	0.01548
ENST00000475649	ENSG00000101251	SEL1L2	protein_coding	-3.79528	1.07708	0.0159913
ENST00000462129	ENSG00000157916	RER1	protein_coding	-3.73613	1.32285	0.0160253
ENST00000382072	ENSG00000242110	AMACR	protein_coding	-3.62682	1.19167	0.0169618
ENST00000554698	ENSG00000100445	SDR39U1	protein_coding	-2.85539	0.673092	0.0181082
ENST00000371818	ENSG00000119917	IFIT3	protein_coding	-3.26775	1.31629	0.0186623
ENST00000511257	ENSG00000183323	CCDC125	protein_coding	-4.6403	-0.766458	0.0189675
ENST00000590964	ENSG00000181038	METTL23	protein_coding	-3.9944	1.08483	0.0191183
ENST00000610189	ENSG00000198522	GPN1	protein_coding	-7.03665	1.38118	0.0197466
ENST00000615951	ENSG00000248333	CDK11B	protein_coding	-4.51287	2.25707	0.0204422
ENST00000598367	ENSG00000099783	HNRNPM	protein_coding	-3.86587	1.81994	0.0204567
ENST00000507700	ENSG00000118564	FBXL5	protein_coding	-4.41266	0.781776	0.0205322
ENST00000465271	ENSG00000143771	CNIH4	protein_coding	-3.40149	2.36694	0.0207512
ENST00000568434	ENSG00000179958	DCTPP1	protein_coding	-3.377	0.272476	0.0211212
ENST00000332132	ENSG00000182518	FAM104B	protein_coding	-4.15113	0.697581	0.0215062
ENST00000468027	ENSG00000187514	PTMA	protein_coding	-3.33589	0.665146	0.0215062
ENST00000354769	ENSG00000167701	GPT	protein_coding	-3.7298	0.603365	0.0223129
ENST00000338624	ENSG00000125505	MBOAT7	protein_coding	-4.94872	2.35789	0.0226685
ENST00000463512	ENSG00000163512	AZI2	protein_coding	-3.96417	-0.0284925	0.0232103
ENST00000544001	ENSG00000129636	ITFG1	protein_coding	-3.8025	2.72254	0.0236294
ENST00000368696	ENSG00000160678	S100A1	protein_coding	-3.32841	-0.110521	0.0241822
ENST00000586539	ENSG00000141338	ABCA8	protein_coding	-3.21891	3.72564	0.0241822
ENST00000465214	ENSG00000025156	HSF2	protein_coding	-3.09589	-0.423358	0.0246365
ENST00000564304	ENSG00000168488	ATXN2L	protein_coding	-3.48587	1.76901	0.0246437
ENST00000483966	ENSG00000153187	HNRNPU	protein_coding	-3.36969	1.34914	0.0253775
ENST00000577134	ENSG00000121067	SPOP	protein_coding	-4.09949	-0.75401	0.0260928
ENST00000631326	ENSG00000105953	OGDH	protein_coding	-4.17107	3.09243	0.0272445
ENST00000394066	ENSG00000174996	KLC2	protein_coding	-3.60732	2.60849	0.0280262
ENST00000626547	ENSG00000170889	RPS9	protein_coding	-3.69298	3.35589	0.0306081
ENST00000573311	ENSG00000167978	SRRM2	protein_coding	-3.49253	0.964025	0.0308461
ENST00000350303	ENSG00000072778	ACADVL	protein_coding	-3.27273	5.43504	0.0308503
ENST00000359276	ENSG00000047230	CTPS2	protein_coding	-2.96707	0.440789	0.0309607
ENST00000297283	ENSG00000164708	PGAM2	protein_coding	-3.17691	-0.440462	0.0321676
ENST00000455664	ENSG00000125877	ITPA	protein_coding	-4.15593	1.55661	0.032831
ENST00000616387	ENSG00000175221	MED16	protein_coding	-2.07227	0.719617	0.0329069
ENST00000618582	ENSG00000135387	CAPRIN1	protein_coding	-3.29252	5.50046	0.0329069
ENST00000355190	ENSG00000198663	C6orf89	protein_coding	-3.47097	2.21683	0.0334847
ENST00000458212	ENSG00000173744	AGFG1	protein_coding	-3.92197	1.56372	0.0335398
ENST00000393340	ENSG00000131446	MGAT1	protein_coding	-3.51882	4.08782	0.0342429
ENST00000539930	ENSG00000129484	PARP2	protein_coding	-3.88785	-0.21558	0.0343504
ENST00000374530	ENSG00000157654	PALM2-AKAP2	protein_coding	-3.18005	3.10029	0.0349349
ENST00000423118	ENSG00000008710	PKD1	protein_coding	-4.28235	3.02768	0.0349349
ENST00000585474	ENSG00000141759	TXNL4A	protein_coding	-1.39782	-0.944879	0.0349349
ENST00000484662	ENSG00000162616	DNAJB4	protein_coding	-3.86826	-1.75266	0.0381377
ENST00000531923	ENSG00000177666	PNPLA2	protein_coding	-2.80853	4.00979	0.0382009
ENST00000395756	ENSG00000072310	SREBF1	protein_coding	-4.14474	4.28442	0.0384321
ENST00000614450	ENSG00000278540	ACACA	protein_coding	-3.07673	-0.272751	0.0386188
ENST00000289431	ENSG00000158480	SPATA2	protein_coding	-2.9677	0.332958	0.0396002
ENST00000555242	ENSG00000170345	FOS	protein_coding	-3.03753	0.268192	0.041864
ENST00000492864	ENSG00000182362	YBEY	protein_coding	-2.7529	-0.739736	0.0423695
ENST00000539084	ENSG00000010292	NCAPD2	protein_coding	-3.45986	1.23904	0.0430105
ENST00000620785	ENSG00000113494	PRLR	protein_coding	-4.31099	-1.32985	0.045195
ENST00000618257	ENSG00000140400	MAN2C1	protein_coding	-3.9674	3.3455	0.0457074
ENST00000505593	ENSG00000113083	LOX	protein_coding	-4.33868	3.0235	0.0457781
ENST00000482186	ENSG00000157617	C2CD2	protein_coding	-3.23731	-0.448859	0.0472836
ENST00000247003	ENSG00000105671	DDX49	protein_coding	-3.78315	2.68493	0.0476724
ENST00000394706	ENSG00000145348	TBCK	protein_coding	-4.01387	2.23417	0.0489123
ENST00000256689	ENSG00000134294	SLC38A2	protein_coding	-3.34257	4.84876	0.0495377

## Sheet: Ob_Nw
Supplemental Data 4:GO and KEGG pathway enrichment analysis of DET in the diﬀerent comparisons
TranscriptRecID	EnsG	GeneSymbol	GeneType	logFC	PValue	FDR		Category	Term	Count	%	PValue	FDR	Genes
ENST00000345254	ENSG00000176986	SEC24C	protein_coding	11.7812	1.07514e-16	1.86667e-12		GOTERM_BP_DIRECT	GO:0006511~ubiquitin-dependent protein catabolic process	11	3.98551	0.000396002	0.00673204	PSMA2, PSMA1, UBE2D3, HERPUD1, USP3, CUL9, UBR5, USP48, UBE2H, USP16, UBE2D1
ENST00000539068	ENSG00000096060	FKBP5	protein_coding	5.20153	2.56174e-14	1.27077e-10		GOTERM_BP_DIRECT	GO:1990000~amyloid fibril formation	3	1.08696	0.00315844	0.0268468	CD36, RIPK3, FKBP1A
ENST00000568434	ENSG00000179958	DCTPP1	protein_coding	6.50561	3.05346e-12	6.89681e-09		GOTERM_BP_DIRECT	GO:0002098~tRNA wobble uridine modification	3	1.08696	0.00736072	0.0337543	ELP3, GTPBP3, CTU2
ENST00000354719	ENSG00000134602	STK26	protein_coding	8.1652	1.17056e-11	1.93555e-08		GOTERM_BP_DIRECT	GO:0046326~positive regulation of glucose import	4	1.44928	0.00973359	0.0337543	CAPN10, ADIPOR2, IGF1, RHOQ
ENST00000259241	ENSG00000136720	HS6ST1	protein_coding	2.06713	3.08002e-10	3.48572e-07		GOTERM_BP_DIRECT	GO:0051726~regulation of cell cycle	7	2.53623	0.010461	0.0337543	LEP, FIGNL1, MASTL, LIN54, USP16, CCNDBP1, CABLES1
ENST00000379052	ENSG00000112183	RBM24	protein_coding	11.029	3.41521e-10	3.59363e-07		GOTERM_BP_DIRECT	GO:0019886~antigen processing and presentation of exogenous peptide antigen via MHC class II	6	2.17391	0.0119133	0.0337543	CLTA, AP2B1, SEC31A, ARF1, KLC1, SEC24C
ENST00000588328	ENSG00000124299	PEPD	protein_coding	6.5481	4.27359e-10	4.36459e-07		GOTERM_BP_DIRECT	GO:0002576~platelet degranulation	6	2.17391	0.0186262	0.0389746	CD9, CD36, CALM3, IGF1, ACTN1, ECM1
ENST00000278968	ENSG00000149591	TAGLN	protein_coding	6.14179	1.03754e-09	9.73715e-07		GOTERM_BP_DIRECT	GO:0008206~bile acid metabolic process	3	1.08696	0.0229192	0.0389746	LEP, ARV1, AKR1C1
ENST00000560540	ENSG00000138606	SHF	protein_coding	8.42533	2.83316e-09	2.04956e-06		GOTERM_BP_DIRECT	GO:0009791~post-embryonic development	5	1.81159	0.0231536	0.0389746	PSEN1, MECP2, PYGO2, PRDM1, PPP1R13L
ENST00000367854	ENSG00000198771	RCSD1	protein_coding	5.74059	3.25685e-09	2.14424e-06		GOTERM_BP_DIRECT	GO:0006886~intracellular protein transport	9	3.26087	0.0251312	0.0389746	CLTA, AP2B1, KLC1, TBC1D10A, TBC1D14, NAPA, TBC1D1, SEC24C, RIC1
ENST00000538545	ENSG00000072110	ACTN1	protein_coding	3.49279	3.26511e-09	2.14424e-06		GOTERM_BP_DIRECT	GO:0032869~cellular response to insulin stimulus	5	1.81159	0.0275115	0.0389746	CAPN10, SLC25A33, DENND4C, RHOQ, RAB10
ENST00000357103	ENSG00000006831	ADIPOR2	protein_coding	5.90106	3.3864e-09	2.1447e-06		GOTERM_BP_DIRECT	GO:0007005~mitochondrion organization	5	1.81159	0.0275115	0.0389746	HTRA2, SSBP1, SLC25A33, RHOT1, RAB38
ENST00000357710	ENSG00000080815	PSEN1	protein_coding	8.09596	1.1009e-08	5.37216e-06		GOTERM_BP_DIRECT	GO:0070936~protein K48-linked ubiquitination	4	1.44928	0.0323721	0.0423327	UBE2E3, UBE2D3, UBE2H, UBE2D1
ENST00000570322	ENSG00000170291	ELP5	protein_coding	7.83927	1.44151e-08	6.49199e-06		GOTERM_BP_DIRECT	GO:0046777~protein autophosphorylation	7	2.53623	0.0434227	0.0496759	STK25, STK11, STK26, TRIM28, RIPK3, MAP3K10, MAP3K13
ENST00000476364	ENSG00000077157	PPP1R12B	protein_coding	7.79501	1.47698e-08	6.49199e-06		GOTERM_BP_DIRECT	GO:0042094~interleukin-2 biosynthetic process	2	0.724638	0.0438316	0.0496759	IL18, IL1RAP
ENST00000594523	ENSG00000160014	CALM3	protein_coding	5.73397	2.16826e-08	8.72299e-06		GOTERM_BP_DIRECT	GO:0051056~regulation of small GTPase mediated signal transduction	6	2.17391	0.0494386	0.0499052	GDI2, RASGRF2, RHOT1, RHOQ, ARHGEF9, ARAP1
ENST00000318282	ENSG00000186260	MKL2	protein_coding	1.85077	3.4475e-08	1.28721e-05		GOTERM_BP_DIRECT	GO:0038095~Fc-epsilon receptor signaling pathway	7	2.53623	0.0499052	0.0499052	PSMA2, PSMA1, LAT2, CALM3, NFATC2, UBE2D1, NFATC1
ENST00000351079	ENSG00000105669	COPE	protein_coding	3.12366	4.52347e-08	1.53993e-05
ENST00000618940	ENSG00000006125	AP2B1	protein_coding	8.60346	1.02376e-07	3.01264e-05		Category	Term	Count	%	PValue	FDR	Genes
ENST00000581031	ENSG00000126858	RHOT1	protein_coding	5.73155	1.87147e-07	4.96069e-05		GOTERM_MF_DIRECT	GO:0005515~protein binding	167	60.5072	5.24436e-06	4.71992e-05	MMS19, LDHB, HM13, THRA, SEC31A, LTBP2, NT5C3B, IL18, SNRPD3, LDHD, FSTL1, GATA2, HTRA2, HOMER3, FBXO27, CUL9, TBC1D14, ORC4, JAGN1, DDAH2, DCTPP1, AUP1, GTPBP3, STK25, STK26, ZNF501, MECP2, ACTN1, GSE1, PSMA2, ISCU, PSMA1, LAT2, CD36, TAGLN, MED15, RFC2, UBR5, RIPK3, PYGO2, PDE4DIP, LRCH4, PRDM1, RAB10, SPATA13, IQCE, SRM, STK11, NAPA, WT1, RIC1, UBE2D3, EIF3G, STAMBPL1, UBE2D1, NR1H3, HERPUD1, …
ENST00000448876	ENSG00000073803	MAP3K13	protein_coding	6.1236	3.29285e-07	7.94034e-05		GOTERM_MF_DIRECT	GO:0061631~ubiquitin conjugating enzyme activity	4	1.44928	0.00901902	0.0361709	UBE2E3, UBE2D3, UBE2H, UBE2D1
ENST00000357022	ENSG00000173209	AHSA2	protein_coding	5.99998	4.47181e-07	0.00010149		GOTERM_MF_DIRECT	GO:0050660~flavin adenine dinucleotide binding	5	1.81159	0.0153108	0.0361709	FMO5, LDHD, DUS1L, ACAD10, ACOX3
ENST00000470404	ENSG00000184007	PTP4A2	protein_coding	5.30988	5.95801e-07	0.000130112		GOTERM_MF_DIRECT	GO:0008134~transcription factor binding	10	3.62319	0.0271749	0.0361709	GATA2, THRA, ENPP2, NAB1, GTF2A2, MECP2, KCTD1, FHL2, NFATC2, PPP1R13L
ENST00000543669	ENSG00000022267	FHL1	protein_coding	2.37397	9.90939e-07	0.000198898		GOTERM_MF_DIRECT	GO:0044325~ion channel binding	6	2.17391	0.0272311	0.0361709	HERPUD1, FYN, FHL1, CALM3, ACTN1, FKBP1A
ENST00000439515	ENSG00000132405	TBC1D14	protein_coding	3.58226	1.20684e-06	0.000230254		GOTERM_MF_DIRECT	GO:0042802~identical protein binding	19	6.88406	0.0321785	0.0361709	LDHB, SRM, STK26, KCTD1, ADIPOR2, FHL2, TFG, PPP1R13L, SAFB2, FYN, NUDT21, RIPK3, PYCARD, GPSM2, THAP1, TNIP1, MAP3K13, GRASP, DCTPP1
ENST00000481673	ENSG00000100288	CHKB	protein_coding	5.04348	1.29988e-06	0.000242672		GOTERM_MF_DIRECT	GO:0000287~magnesium ion binding	8	2.89855	0.0337528	0.0361709	NT5C3A, ARF1, NT5C3B, FIGNL1, STK11, STK26, DIS3L2, DCTPP1
ENST00000620116	ENSG00000186446	ZNF501	protein_coding	6.00145	1.33504e-06	0.00024528		GOTERM_MF_DIRECT	GO:0005528~FK506 binding	3	1.08696	0.0353419	0.0361709	FKBP5, FKBP1A, NFATC1
ENST00000503715	ENSG00000124795	DEK	protein_coding	4.57155	3.04783e-06	0.000499212		GOTERM_MF_DIRECT	GO:0042393~histone binding	6	2.17391	0.0361709	0.0361709	L3MBTL2, USP3, PYGO2, PKN1, DEK, USP16
ENST00000402093	ENSG00000219200	RNASEK	protein_coding	5.49126	3.60007e-06	0.000578745
ENST00000402849	ENSG00000100028	SNRPD3	protein_coding	2.56027	4.40591e-06	0.000692266		Category	Term	Count	%	PValue	FDR	Genes
ENST00000594258	ENSG00000076928	ARHGEF1	protein_coding	3.14676	7.39726e-06	0.0010977		GOTERM_CC_DIRECT	GO:0005829~cytosol	83	30.0725	1.71218e-07	1.19853e-06	LDHB, CLTA, SEC31A, THRA, GMPR2, NT5C3A, NT5C3B, IL18, SNRPD3, RHOQ, ACOT1, AP2B1, HTRA2, HOMER3, TBC1D14, CTU2, DDAH2, SEC24C, DUS1L, AKR1C1, CABLES1, DCTPP1, CCDC88A, ARHGEF1, STK26, MECP2, ACTN1, PKN1, ARHGEF9, PSMA2, PSMA1, ISCU, ALDH7A1, CAPN10, RASGRF2, RPS17, RIPK3, CA3, COPE, FUOM, NUP98, SRM, STK11, FHL1, CHKB, PPP1R12B, CYTH4, TFG, FKBP1A, NAPA, RIC1, NGLY1, IARS, UBE2D3, EIF3G, KLC1, P…
ENST00000473035	ENSG00000084733	RAB10	protein_coding	3.96536	9.1266e-06	0.00131499		GOTERM_CC_DIRECT	GO:0005654~nucleoplasm	69	25	4.70078e-06	1.64527e-05	MMS19, THRA, SNRPD3, UTP15, VPS37A, DEK, FUBP1, GATA2, GTF2A2, ORC4, MASTL, CCDC106, TNIP1, ZNF45, PKN1, MBNL1, PSMA2, PSMA1, MED15, RPS17, FANCD2, RFC2, UBR5, PYGO2, NCAPH2, LIN54, PRDM1, SPATA13, MDH2, COPE, NUP98, FKBP5, STK11, PPP1R12B, RNH1, FHL2, WT1, IARS, UBE2D3, NELFCD, NUDT21, UBE2D1, NFATC2, NR1H3, NFATC1, TM2D1, L3MBTL2, SRA1, TRIM28, MPHOSPH10, LMCD1, ILF3, PPP1R13L, SAFB2, IRF9, PAX…
ENST00000391983	ENSG00000142330	CAPN10	protein_coding	5.83523	9.4522e-06	0.00134799		GOTERM_CC_DIRECT	GO:0005739~mitochondrion	36	13.0435	0.000382603	0.000892741	LDHB, MRPS34, CMC1, NT5C3A, STK11, LDHD, ECHDC2, ACOX3, ACOT9, HTRA2, TPP1, CTU2, PYCARD, XAF1, DDAH2, GTPBP3, SSBP1, MECP2, NDFIP2, ILF3, ACACB, OCIAD1, ISCU, EMC8, ALDH7A1, CAPN10, PSEN1, FYN, RIPK3, RHOT1, RAB38, USP48, SCP2, ACAD10, MDH2, IQCE
ENST00000529750	ENSG00000023171	GRAMD1B	protein_coding	3.51375	1.01797e-05	0.0014196		GOTERM_CC_DIRECT	GO:0005737~cytoplasm	99	35.8696	0.00127204	0.00222607	MMS19, LDHB, SEC31A, GMPR2, NT5C3A, NT5C3B, SNRPD3, MEDAG, HOMER3, CUL9, ORC4, DDAH2, STK25, STK26, ACTN1, HCFC1R1, PSMA2, PSMA1, ISCU, TAGLN, MED15, UBR5, ZNF383, PDE4DIP, PRDM1, SPATA13, STK11, WT1, EIF3G, UBE2D1, S100A16, SRA1, LMCD1, ALMS1, NDFIP2, U2AF1L4, SAFB2, UBE2E3, RNF7, AIDA, DMTF1, CCNDBP1, FIGNL1, VPS37A, UTP15, CTU2, SPG20, MASTL, USP16, CCDC106, TNIP1, ELP3, ARHGEF1, ELP5, PKN1, U…
ENST00000392807	ENSG00000136003	ISCU	protein_coding	4.61711	1.06342e-05	0.00147117		GOTERM_CC_DIRECT	GO:0016020~membrane	49	17.7536	0.00202164	0.0028303	MMS19, LDHB, GYPC, CLTA, HM13, FKBP5, STK11, DNAJC10, FKBP1A, NAPA, RIC1, ACOX3, IARS, CD9, AP2B1, SRPX, HTRA2, KLC1, IL1RAP, NELFCD, STAMBPL1, SPRED3, TCTN1, AGO3, AGPAT3, AUP1, HERPUD1, GDI2, CCDC88A, ITGA1, ILF3, RFNG, OCIAD1, HLA-F, EMC8, RASL11A, CD36, AIDA, PSEN1, MED15, RPS17, UBR5, DDX50, RHOT1, NCAPH2, RAB38, SCP2, GRAMD1B, MAP3K13
ENST00000488206	ENSG00000162604	TM2D1	protein_coding	6.25811	1.51882e-05	0.00203628		GOTERM_CC_DIRECT	GO:0000139~Golgi membrane	17	6.15942	0.0120509	0.0140593	SEC31A, STK25, STK26, CYTH4, NDFIP2, TFG, NAPA, PAQR3, RIC1, HLA-F, PSEN1, ARF1, HS6ST1, RAB10, SEC24C, AGPAT3, COPE
ENST00000301935	ENSG00000162191	UBXN1	protein_coding	6.3467	1.67293e-05	0.00221721		GOTERM_CC_DIRECT	GO:0005794~Golgi apparatus	20	7.24638	0.043547	0.043547	ARV1, GDI2, CCDC88A, STK25, STK26, NDFIP2, PKDCC, GOLGA6L4, PAQR3, CD36, ZDHHC16, PSEN1, TBC1D14, YIPF2, PDE4DIP, RAB38, CWC22, RAB10, ARAP1, COPE
ENST00000557894	ENSG00000213928	IRF9	protein_coding	6.05638	1.77353e-05	0.0023416
ENST00000261978	ENSG00000119681	LTBP2	protein_coding	1.55841	2.02459e-05	0.00260377		Category	Term	Count	%	PValue	FDR	Genes
ENST00000296522	ENSG00000164120	HPGD	protein_coding	3.02004	2.20387e-05	0.00277272		KEGG_PATHWAY	hsa00620:Pyruvate metabolism	6	2.17391	0.000393914	0.00196957	LDHB, ALDH7A1, LDHD, ACACB, ALDH3A2, MDH2
ENST00000587802	ENSG00000130254	SAFB2	protein_coding	4.78628	2.96822e-05	0.00352974		KEGG_PATHWAY	hsa04152:AMPK signaling pathway	7	2.53623	0.0129093	0.0249632	LEP, CD36, STK11, ADIPOR2, IGF1, TBC1D1, RAB10
ENST00000584985	ENSG00000126351	THRA	protein_coding	3.47612	3.18665e-05	0.00373829		KEGG_PATHWAY	hsa04141:Protein processing in endoplasmic reticulum	8	2.89855	0.017881	0.0249632	NGLY1, UBE2E3, UBE2D3, HERPUD1, SEC31A, DNAJC10, UBE2D1, SEC24C
ENST00000578907	ENSG00000169718	DUS1L	protein_coding	4.26186	4.113e-05	0.00469802		KEGG_PATHWAY	hsa03320:PPAR signaling pathway	5	1.81159	0.0216327	0.0249632	CD36, SLC27A6, SCP2, NR1H3, ACOX3
ENST00000518929	ENSG00000154263	ABCA10	protein_coding	3.20341	4.61808e-05	0.00509074		KEGG_PATHWAY	hsa04920:Adipocytokine signaling pathway	5	1.81159	0.0249632	0.0249632	LEP, CD36, STK11, ADIPOR2, ACACB
ENST00000489987	ENSG00000179348	GATA2	protein_coding	2.30119	5.31664e-05	0.00573339
ENST00000567110	ENSG00000167005	NUDT21	protein_coding	3.51276	5.80881e-05	0.00616835
ENST00000352222	ENSG00000115317	HTRA2	protein_coding	4.02874	7.68456e-05	0.00771602
ENST00000072516	ENSG00000196083	IL1RAP	protein_coding	3.08692	8.96213e-05	0.0087416
ENST00000504669	ENSG00000213949	ITGA1	protein_coding	4.22078	9.47289e-05	0.00916258
ENST00000438666	ENSG00000133104	SPG20	protein_coding	3.59534	0.00010712	0.0101352
ENST00000338502	ENSG00000188766	SPRED3	protein_coding	3.01764	0.00011646	0.0108417
ENST00000483792	ENSG00000213722	DDAH2	protein_coding	3.39368	0.000118122	0.0109087
ENST00000317502	ENSG00000148824	MTG1	protein_coding	5.14138	0.000125651	0.0114517
ENST00000420554	ENSG00000100938	GMPR2	protein_coding	1.53334	0.000141907	0.0127328
ENST00000396076	ENSG00000111716	LDHB	protein_coding	2.82326	0.000152418	0.0133989
ENST00000355460	ENSG00000152601	MBNL1	protein_coding	4.02866	0.000155478	0.0135308
ENST00000476100	ENSG00000187134	AKR1C1	protein_coding	3.94367	0.00017635	0.0150087
ENST00000533863	ENSG00000149591	TAGLN	protein_coding	2.86113	0.000189049	0.0158564
ENST00000508491	ENSG00000164338	UTP15	protein_coding	3.95173	0.000243268	0.0195332
ENST00000575948	ENSG00000010539	ZNF200	protein_coding	5.21892	0.000246831	0.0196566
ENST00000489651	ENSG00000099917	MED15	protein_coding	2.71492	0.000261787	0.0204276
ENST00000429801	ENSG00000110713	NUP98	protein_coding	1.02423	0.000292082	0.0223891
ENST00000521829	ENSG00000155975	VPS37A	protein_coding	3.02625	0.000298807	0.0226546
ENST00000244230	ENSG00000124383	MPHOSPH10	protein_coding	1.07025	0.000313149	0.0234708
ENST00000522483	ENSG00000161277	THAP8	protein_coding	4.4174	0.00031363	0.0234708
ENST00000491443	ENSG00000126070	AGO3	protein_coding	2.73464	0.000345727	0.0254344
ENST00000308868	ENSG00000174697	LEP	protein_coding	2.80606	0.000376924	0.0273242
ENST00000392951	ENSG00000149591	TAGLN	protein_coding	2.80461	0.00045856	0.0322329
ENST00000368551	ENSG00000148803	FUOM	protein_coding	2.86532	0.000477539	0.0334316
ENST00000533371	ENSG00000166340	TPP1	protein_coding	3.74535	0.000584951	0.0389863
ENST00000373585	ENSG00000107625	DDX50	protein_coding	1.27251	0.000605466	0.0401225
ENST00000615798	ENSG00000111799	COL12A1	protein_coding	3.72172	0.000609629	0.0403214
ENST00000267869	ENSG00000140307	GTF2A2	protein_coding	2.9603	0.000697783	0.0446221
ENST00000369351	ENSG00000178104	PDE4DIP	protein_coding	2.69696	0.000720725	0.0456963
ENST00000392955	ENSG00000099204	ABLIM1	protein_coding	2.37166	0.000752007	0.0470499
ENST00000378529	ENSG00000116151	MORN1	protein_coding	4.54046	0.000770599	0.0475608
ENST00000340020	ENSG00000186063	AIDA	protein_coding	1.27849	0.000788162	0.0484279
ENST00000480648	ENSG00000204852	TCTN1	protein_coding	4.98623	0.000789373	0.0484279
ENST00000525701	ENSG00000023191	RNH1	protein_coding	2.04004	0.00082302	0.0499625
ENST00000253458	ENSG00000131149	GSE1	protein_coding	-20.731	6.95677e-16	5.71405e-12
ENST00000542471	ENSG00000176473	WDR25	protein_coding	-13.092	9.71076e-12	1.85101e-08
ENST00000367483	ENSG00000116690	PRG4	protein_coding	-12.1844	2.8828e-11	4.35228e-08
ENST00000241463	ENSG00000122035	RASL11A	protein_coding	-8.88423	3.023e-11	4.37378e-08
ENST00000522167	ENSG00000136960	ENPP2	protein_coding	-10.1615	3.11189e-10	3.48572e-07
ENST00000295633	ENSG00000163430	FSTL1	protein_coding	-8.74832	1.4301e-09	1.27331e-06
ENST00000397375	ENSG00000074071	MRPS34	protein_coding	-9.56515	1.51629e-09	1.31629e-06
ENST00000442461	ENSG00000189308	LIN54	protein_coding	-9.3472	2.38027e-09	1.87847e-06
ENST00000223215	ENSG00000106484	MEST	protein_coding	-9.53969	2.55342e-09	1.97033e-06
ENST00000265080	ENSG00000113319	RASGRF2	protein_coding	-10.7341	2.75332e-09	2.04956e-06
ENST00000520427	ENSG00000213523	SRA1	protein_coding	-9.77069	3.18621e-09	2.14424e-06
ENST00000518189	ENSG00000198624	CCDC69	protein_coding	-9.21861	3.2373e-09	2.14424e-06
ENST00000396009	ENSG00000101096	NFATC2	protein_coding	-9.20278	4.4314e-09	2.69957e-06
ENST00000380750	ENSG00000205572	SERF1B	protein_coding	-9.29419	5.86898e-09	3.40791e-06
ENST00000410053	ENSG00000163510	CWC22	protein_coding	-10.0556	7.08062e-09	3.90266e-06
ENST00000521015	ENSG00000134014	ELP3	protein_coding	-11.5128	8.25433e-09	4.40959e-06
ENST00000448471	ENSG00000261408	TEN1-CDK3	protein_coding	-9.22804	9.5134e-09	5.0052e-06
ENST00000480908	ENSG00000114125	RNF7	protein_coding	-9.4066	9.97582e-09	5.17016e-06
ENST00000308271	ENSG00000090686	USP48	protein_coding	-6.13912	1.05255e-08	5.22124e-06
ENST00000340736	ENSG00000072071	LPHN1	protein_coding	-7.51859	1.47529e-08	6.49199e-06
ENST00000594001	ENSG00000105402	NAPA	protein_coding	-8.94612	1.52688e-08	6.57117e-06
ENST00000253024	ENSG00000130726	TRIM28	protein_coding	-7.99271	1.53285e-08	6.57117e-06
ENST00000466828	ENSG00000107960	OBFC1	protein_coding	-8.65558	1.64613e-08	6.97075e-06
ENST00000251303	ENSG00000132207	SLX1A	protein_coding	-8.336	2.05995e-08	8.41524e-06
ENST00000478396	ENSG00000136536	MARCH7	protein_coding	-12.2137	2.49859e-08	9.74844e-06
ENST00000476228	ENSG00000114354	TFG	protein_coding	-8.34373	2.60329e-08	1.00441e-05
ENST00000311148	ENSG00000184227	ACOT1	protein_coding	-10.7841	3.67281e-08	1.35268e-05
ENST00000394566	ENSG00000172716	SLFN11	protein_coding	-6.82323	3.79738e-08	1.35938e-05
ENST00000302692	ENSG00000171612	SLC25A33	protein_coding	-8.10336	4.04581e-08	1.39364e-05
ENST00000360957	ENSG00000104881	PPP1R13L	protein_coding	-3.98338	4.04834e-08	1.39364e-05
ENST00000401827	ENSG00000205268	PDE7A	protein_coding	-5.96848	4.88808e-08	1.6479e-05
ENST00000447699	ENSG00000196305	IARS	protein_coding	-8.02247	5.6983e-08	1.88445e-05
ENST00000402050	ENSG00000106012	IQCE	protein_coding	-8.7326	6.95137e-08	2.21861e-05
ENST00000461665	ENSG00000146701	MDH2	protein_coding	-8.23951	7.64058e-08	2.39701e-05
ENST00000616966	ENSG00000171135	JAGN1	protein_coding	-6.05842	9.23892e-08	2.83905e-05
ENST00000452106	ENSG00000100395	L3MBTL2	protein_coding	-6.6974	1.00508e-07	3.00867e-05
ENST00000469123	ENSG00000106028	SSBP1	protein_coding	-7.24023	1.66996e-07	4.56597e-05
ENST00000375425	ENSG00000204356	NELFE	protein_coding	-9.4802	1.68914e-07	4.58233e-05
ENST00000331242	ENSG00000135164	DMTF1	protein_coding	-8.32733	1.85864e-07	4.96069e-05
ENST00000515604	ENSG00000272414	FAM47E-STBD1	protein_coding	-9.02324	1.91265e-07	5.03144e-05
ENST00000397260	ENSG00000092096	SLC22A17	protein_coding	-11.9788	2.1464e-07	5.60389e-05
ENST00000337386	ENSG00000138386	NAB1	protein_coding	-7.33732	2.16707e-07	5.61562e-05
ENST00000591084	ENSG00000161265	U2AF1L4	protein_coding	-5.32683	2.27716e-07	5.8572e-05
ENST00000557450	ENSG00000126214	KLC1	protein_coding	-8.41388	2.62425e-07	6.60323e-05
ENST00000352131	ENSG00000049541	RFC2	protein_coding	-8.13708	3.17616e-07	7.71251e-05
ENST00000262384	ENSG00000102921	N4BP1	protein_coding	-8.39453	3.70427e-07	8.87082e-05
ENST00000374870	ENSG00000131089	ARHGEF9	protein_coding	-8.49894	3.78925e-07	9.01217e-05
ENST00000494124	ENSG00000137145	DENND4C	protein_coding	-7.72226	3.83755e-07	9.06497e-05
ENST00000597986	ENSG00000130758	MAP3K10	protein_coding	-8.15165	3.94728e-07	9.26116e-05
ENST00000573947	ENSG00000072210	ALDH3A2	protein_coding	-10.9751	4.05601e-07	9.45241e-05
ENST00000460612	ENSG00000121310	ECHDC2	protein_coding	-7.62112	4.63805e-07	0.000104579
ENST00000455480	ENSG00000111271	ACAD10	protein_coding	-6.54095	5.01522e-07	0.000112354
ENST00000560229	ENSG00000182774	RPS17	protein_coding	-8.2277	6.03273e-07	0.000130112
ENST00000586790	ENSG00000173581	CCDC106	protein_coding	-8.74727	6.3155e-07	0.00013537
ENST00000221222	ENSG00000051128	HOMER3	protein_coding	-7.70641	7.25102e-07	0.000152078
ENST00000393545	ENSG00000042317	SPATA7	protein_coding	-7.76753	7.27019e-07	0.000152078
ENST00000309733	ENSG00000174749	C4orf32	protein_coding	-5.13301	7.84026e-07	0.000163021
ENST00000485852	ENSG00000164904	ALDH7A1	protein_coding	-6.70693	8.19515e-07	0.000168384
ENST00000327238	ENSG00000155229	MMS19	protein_coding	-9.0075	1.00127e-06	0.000199817
ENST00000324894	ENSG00000130299	GTPBP3	protein_coding	-9.34985	1.03965e-06	0.00020629
ENST00000432183	ENSG00000119729	RHOQ	protein_coding	-5.95316	1.16796e-06	0.000226571
ENST00000353979	ENSG00000171307	ZDHHC16	protein_coding	-6.19096	1.19824e-06	0.000230254
ENST00000480673	ENSG00000162613	FUBP1	protein_coding	-11.3751	1.32865e-06	0.00024528
ENST00000368704	ENSG00000188643	S100A16	protein_coding	-4.5731	1.39811e-06	0.000255516
ENST00000452863	ENSG00000184937	WT1	protein_coding	-5.68282	1.42455e-06	0.000258985
ENST00000401000	ENSG00000163125	RPRD2	protein_coding	-16.8942	1.51534e-06	0.000272636
ENST00000556572	ENSG00000087303	NID2	protein_coding	-8.25792	1.88547e-06	0.000335737
ENST00000586237	ENSG00000123143	PKN1	protein_coding	-7.91925	1.96636e-06	0.000346599
ENST00000508798	ENSG00000168785	TSPAN5	protein_coding	-9.14271	1.99633e-06	0.000350104
ENST00000264126	ENSG00000121957	GPSM2	protein_coding	-4.73795	2.18119e-06	0.000374949
ENST00000350605	ENSG00000103490	PYCARD	protein_coding	-6.08171	2.21228e-06	0.00037842
ENST00000456458	ENSG00000122643	NT5C3A	protein_coding	-8.12636	2.36342e-06	0.000402292
ENST00000372647	ENSG00000112659	CUL9	protein_coding	-9.6245	2.51774e-06	0.000426469
ENST00000248901	ENSG00000100055	CYTH4	protein_coding	-7.06888	2.5842e-06	0.000435601
ENST00000310300	ENSG00000077454	LRCH4	protein_coding	-5.5981	2.76194e-06	0.000458993
ENST00000345117	ENSG00000131931	THAP1	protein_coding	-7.02221	2.95572e-06	0.000488735
ENST00000443462	ENSG00000138674	SEC31A	protein_coding	-9.03065	3.41379e-06	0.000553927
ENST00000275635	ENSG00000086730	LAT2	protein_coding	-4.01951	3.47353e-06	0.000560999
ENST00000368457	ENSG00000163348	PYGO2	protein_coding	-4.65077	3.89637e-06	0.000617797
ENST00000373475	ENSG00000116497	S100PBP	protein_coding	-8.63984	4.38085e-06	0.000691457
ENST00000538686	ENSG00000140455	USP3	protein_coding	-3.90442	4.47812e-06	0.000700442
ENST00000620924	ENSG00000102471	NDFIP2	protein_coding	-6.68407	4.50634e-06	0.000701696
ENST00000336838	ENSG00000115355	CCDC88A	protein_coding	-1.68825	5.03718e-06	0.000773943
ENST00000253513	ENSG00000131203	IDO1	protein_coding	-18.2	5.92001e-06	0.000905578
ENST00000574980	ENSG00000103145	HCFC1R1	protein_coding	-5.07766	6.27214e-06	0.000946929
ENST00000426523	ENSG00000186635	ARAP1	protein_coding	-4.7977	6.43477e-06	0.000967277
ENST00000216274	ENSG00000129465	RIPK3	protein_coding	-6.37442	9.50608e-06	0.00134799
ENST00000488241	ENSG00000188186	LAMTOR4	protein_coding	-4.23854	9.51093e-06	0.00134799
ENST00000419198	ENSG00000100908	EMC9	protein_coding	-4.81497	1.01404e-05	0.0014196
ENST00000589454	ENSG00000130811	EIF3G	protein_coding	-7.20365	1.02376e-05	0.00142196
ENST00000586575	ENSG00000130733	YIPF2	protein_coding	-4.72411	1.11302e-05	0.00153367
ENST00000477034	ENSG00000120539	MASTL	protein_coding	-6.68452	1.21013e-05	0.00164787
ENST00000425583	ENSG00000109180	OCIAD1	protein_coding	-5.39855	1.26e-05	0.00170907
ENST00000613488	ENSG00000275993	CH507-42P11.8	protein_coding	-10.9596	1.99491e-05	0.00258475
ENST00000511044	ENSG00000156453	PCDH1	protein_coding	-6.4292	2.00385e-05	0.00258667
ENST00000426997	ENSG00000237651	C2orf74	protein_coding	-4.33907	2.13688e-05	0.00271799
ENST00000470744	ENSG00000122705	CLTA	protein_coding	-8.89592	2.23749e-05	0.00280486
ENST00000545243	ENSG00000107036	RIC1	protein_coding	-4.24521	2.32811e-05	0.00290797
ENST00000418988	ENSG00000129084	PSMA1	protein_coding	-5.93029	2.37647e-05	0.00295773
ENST00000525547	ENSG00000150782	IL18	protein_coding	-7.76735	2.40181e-05	0.00297858
ENST00000343028	ENSG00000064115	TM7SF3	protein_coding	-18.5051	2.48569e-05	0.00304993
ENST00000298171	ENSG00000165409	TSHR	protein_coding	-5.71067	2.54189e-05	0.0031079
ENST00000512733	ENSG00000163291	PAQR3	protein_coding	-3.89018	2.58977e-05	0.00315534
ENST00000397192	ENSG00000157212	PAXIP1	protein_coding	-5.90394	2.70642e-05	0.00328593
ENST00000007390	ENSG00000007520	TSR3	protein_coding	-6.18771	3.06501e-05	0.0036324
ENST00000369047	ENSG00000143369	ECM1	protein_coding	-5.94624	3.07934e-05	0.00363697
ENST00000615497	ENSG00000065882	TBC1D1	protein_coding	-9.95339	3.32472e-05	0.00387377
ENST00000392857	ENSG00000115947	ORC4	protein_coding	-5.70259	3.51932e-05	0.00405996
ENST00000394450	ENSG00000186314	PRELID2	protein_coding	-6.63975	3.60086e-05	0.00414028
ENST00000256925	ENSG00000134508	CABLES1	protein_coding	-6.4882	3.62028e-05	0.00414887
ENST00000358813	ENSG00000115009	CCL20	protein_coding	-5.02766	4.24643e-05	0.00480303
ENST00000587843	ENSG00000067836	ROGDI	protein_coding	-10.4782	4.26445e-05	0.00480775
ENST00000599668	ENSG00000125730	C3	protein_coding	-7.75882	4.57996e-05	0.00507259
ENST00000600321	ENSG00000221923	ZNF880	protein_coding	-5.18271	4.58081e-05	0.00507259
ENST00000578676	ENSG00000169733	RFNG	protein_coding	-4.99805	4.83975e-05	0.00531821
ENST00000361842	ENSG00000132530	XAF1	protein_coding	-5.40571	4.90397e-05	0.00537179
ENST00000370177	ENSG00000125534	PPDPF	protein_coding	-7.25685	5.19754e-05	0.00563998
ENST00000541182	ENSG00000143761	ARF1	protein_coding	-6.49088	5.2945e-05	0.0057273
ENST00000397386	ENSG00000071282	LMCD1	protein_coding	-12.1162	5.41729e-05	0.00582383
ENST00000373910	ENSG00000072401	UBE2D1	protein_coding	-11.0874	5.5114e-05	0.00590672
ENST00000382108	ENSG00000182957	SPATA13	protein_coding	-4.81514	5.84476e-05	0.00618761
ENST00000377848	ENSG00000076555	ACACB	protein_coding	-5.29852	6.31637e-05	0.00658648
ENST00000340852	ENSG00000101294	HM13	protein_coding	-5.89111	6.37554e-05	0.00658882
ENST00000602888	ENSG00000170035	UBE2E3	protein_coding	-4.67139	6.67536e-05	0.0068782
ENST00000280699	ENSG00000151092	NGLY1	protein_coding	-5.90861	7.21532e-05	0.00736896
ENST00000473814	ENSG00000186591	UBE2H	protein_coding	-4.82445	7.43558e-05	0.00757165
ENST00000612719	ENSG00000251247	ZNF345	protein_coding	-5.03534	7.63778e-05	0.00771602
ENST00000423894	ENSG00000187118	CMC1	protein_coding	-7.21442	7.68847e-05	0.00771602
ENST00000269973	ENSG00000124459	ZNF45	protein_coding	-5.00359	8.36384e-05	0.00832166
ENST00000453996	ENSG00000174177	CTU2	protein_coding	-8.5738	8.40865e-05	0.00834234
ENST00000380482	ENSG00000102802	MEDAG	protein_coding	-4.8929	8.45383e-05	0.00836327
ENST00000441012	ENSG00000025434	NR1H3	protein_coding	-6.97536	8.8587e-05	0.00869601
ENST00000413009	ENSG00000087008	ACOX3	protein_coding	-8.37801	9.54719e-05	0.0092088
ENST00000282701	ENSG00000152785	BMP3	protein_coding	-4.12089	0.000101816	0.00971281
ENST00000486234	ENSG00000115307	AUP1	protein_coding	-7.72025	0.00010577	0.0100349
ENST00000294964	ENSG00000162878	PKDCC	protein_coding	-7.0577	0.000113419	0.0106785
ENST00000401869	ENSG00000115694	STK25	protein_coding	-4.99201	0.000114425	0.0107387
ENST00000423048	ENSG00000116127	ALMS1	protein_coding	-5.01979	0.000122156	0.0111919
ENST00000301887	ENSG00000168062	BATF2	protein_coding	-5.0949	0.000130639	0.0118548
ENST00000426395	ENSG00000104870	FCGRT	protein_coding	-5.49399	0.000134338	0.0121478
ENST00000421200	ENSG00000167615	LENG8	protein_coding	-7.52443	0.000135081	0.0121832
ENST00000310256	ENSG00000173409	ARV1	protein_coding	-5.72976	0.000135536	0.0121926
ENST00000613602	ENSG00000132436	FIGNL1	protein_coding	-5.22	0.000151934	0.0133902
ENST00000552049	ENSG00000161835	GRASP	protein_coding	-1.98915	0.000154574	0.0135154
ENST00000523338	ENSG00000145901	TNIP1	protein_coding	-6.98073	0.000154597	0.0135154
ENST00000393353	ENSG00000115641	FHL2	protein_coding	-6.50305	0.000166911	0.0143817
ENST00000408011	ENSG00000134504	KCTD1	protein_coding	-5.57862	0.000168057	0.0144445
ENST00000538259	ENSG00000182809	CRIP2	protein_coding	-7.28092	0.000203403	0.0168971
ENST00000509137	ENSG00000161243	FBXO27	protein_coding	-8.40621	0.000204025	0.0169082
ENST00000568358	ENSG00000051108	HERPUD1	protein_coding	-5.12645	0.000217946	0.0178754
ENST00000506176	ENSG00000113396	SLC27A6	protein_coding	-5.03076	0.000218269	0.0178754
ENST00000376957	ENSG00000116649	SRM	protein_coding	-5.8133	0.000225971	0.0183332
ENST00000590869	ENSG00000129351	ILF3	protein_coding	-4.6345	0.000230106	0.0186252
ENST00000569745	ENSG00000166946	CCNDBP1	protein_coding	-4.42585	0.000237656	0.0191916
ENST00000510439	ENSG00000184206	GOLGA6L4	protein_coding	-5.14312	0.000243597	0.0195332
ENST00000617871	ENSG00000010278	CD9	protein_coding	-6.93142	0.000244136	0.0195332
ENST00000409836	ENSG00000136732	GYPC	protein_coding	-4.93486	0.000254698	0.0201003
ENST00000432207	ENSG00000135218	CD36	protein_coding	-9.54485	0.00025594	0.0201525
ENST00000417808	ENSG00000144535	DIS3L2	protein_coding	-4.69314	0.000262943	0.0204718
ENST00000371804	ENSG00000185745	IFIT1	protein_coding	-6.03608	0.000281264	0.021752
ENST00000253457	ENSG00000131148	EMC8	protein_coding	-8.33595	0.000288046	0.0221776
ENST00000371926	ENSG00000138134	STAMBPL1	protein_coding	-5.02349	0.000289665	0.022253
ENST00000327505	ENSG00000160216	AGPAT3	protein_coding	-5.33995	0.000295109	0.02251
ENST00000378533	ENSG00000101955	SRPX	protein_coding	-10.7092	0.000295604	0.02251
ENST00000037869	ENSG00000035141	FAM136A	protein_coding	-5.52567	0.000301173	0.0227842
ENST00000244576	ENSG00000124613	ZNF391	protein_coding	-7.47375	0.000306982	0.0231229
ENST00000622433	ENSG00000169057	MECP2	protein_coding	-4.24074	0.000310998	0.0233747
ENST00000369272	ENSG00000131781	FMO5	protein_coding	-4.50288	0.000315905	0.0235396
ENST00000243662	ENSG00000123892	RAB38	protein_coding	-12.0346	0.000343613	0.0253325
ENST00000298119	ENSG00000165379	LRFN5	protein_coding	-4.08451	0.000362835	0.0266365
ENST00000383807	ENSG00000144554	FANCD2	protein_coding	-4.13757	0.000364417	0.0266962
ENST00000545796	ENSG00000131196	NFATC1	protein_coding	-9.82274	0.000373614	0.027141
ENST00000544850	ENSG00000111196	MAGOHB	protein_coding	-4.64964	0.000383828	0.027666
ENST00000407246	ENSG00000116171	SCP2	protein_coding	-6.87467	0.000384028	0.027666
ENST00000300051	ENSG00000166816	LDHD	protein_coding	-9.94683	0.000385185	0.0276919
ENST00000428120	ENSG00000162585	C1orf86	protein_coding	-4.53693	0.000389099	0.0279154
ENST00000491074	ENSG00000077232	DNAJC10	protein_coding	-4.67775	0.000404257	0.0289432
ENST00000543355	ENSG00000167272	POP5	protein_coding	-4.23862	0.00041949	0.029792
ENST00000310496	ENSG00000169733	RFNG	protein_coding	-15.3925	0.000431665	0.0305901
ENST00000215790	ENSG00000099992	TBC1D10A	protein_coding	-4.06876	0.000439178	0.0310591
ENST00000590503	ENSG00000188283	ZNF383	protein_coding	-3.62927	0.000450429	0.03179
ENST00000379573	ENSG00000125843	AP5S1	protein_coding	-5.09719	0.000479059	0.0334705
ENST00000602795	ENSG00000101158	NELFCD	protein_coding	-16.842	0.000507363	0.0350533
ENST00000502268	ENSG00000121073	SLC35B1	protein_coding	-4.45398	0.000529652	0.0361961
ENST00000394801	ENSG00000109332	UBE2D3	protein_coding	-1.285	0.000545702	0.0370821
ENST00000333412	ENSG00000238083	LRRC37A2	protein_coding	-4.11896	0.000551195	0.0371997
ENST00000393910	ENSG00000141698	NT5C3B	protein_coding	-4.32334	0.000561846	0.0376632
ENST00000403140	ENSG00000163378	EOGT	protein_coding	-4.03132	0.000582463	0.0389701
ENST00000474835	ENSG00000156256	USP16	protein_coding	-3.64451	0.000588088	0.0391202
ENST00000220959	ENSG00000104517	UBR5	protein_coding	-4.31295	0.000629591	0.0413759
ENST00000593068	ENSG00000182087	TMEM259	protein_coding	-4.81454	0.000635679	0.0414332
ENST00000491885	ENSG00000010810	FYN	protein_coding	-4.79807	0.000649325	0.0421442
ENST00000430412	ENSG00000196950	SLC39A10	protein_coding	-3.27115	0.000658745	0.0426758
ENST00000285381	ENSG00000164879	CA3	protein_coding	-3.07198	0.000660097	0.0426838
ENST00000392904	ENSG00000017427	IGF1	protein_coding	-5.65405	0.000691025	0.0443533
ENST00000457444	ENSG00000106588	PSMA2	protein_coding	-6.70865	0.000693634	0.0444386
ENST00000420993	ENSG00000025770	NCAPH2	protein_coding	-3.30251	0.000705681	0.0449705
ENST00000297195	ENSG00000164638	SLC29A4	protein_coding	-6.54094	0.00070582	0.0449705
ENST00000336430	ENSG00000123130	ACOT9	protein_coding	-5.23208	0.00074041	0.0466606
ENST00000380181	ENSG00000057608	GDI2	protein_coding	-4.3789	0.000750528	0.0470421
ENST00000400137	ENSG00000088832	FKBP1A	protein_coding	-3.70134	0.000756498	0.0472113
ENST00000369096	ENSG00000057657	PRDM1	protein_coding	-5.94541	0.000760025	0.0472113
ENST00000586358	ENSG00000118046	STK11	protein_coding	-5.77227	0.000799736	0.0489771
ENST00000334668	ENSG00000204642	HLA-F	protein_coding	-5.16844	0.000802964	0.0490068
